# Supplementary material
Source: publisher figshare collection journal article supplement (https://brill.figshare.com/articles/dataset/_/27377448)
Supplement: Supplementary file 1 [file 1]

## Sheet: Table S1
Supplementary Table S1. Clinical information of CRC patient group
Basic info.														Tumor info.									Blood indicators
NO	SAMPLE ID	Data-Id	SEX	AGE	Dx	LAP	OP_DATE	ASA	PRE_CEA(ng/mL)	PRE_CA19 (ng/mL)	HAR_LN (Harvested lymph node count)	MET_LN (Metastastic lymph node count)	HISTOLOGY	T	N	M	STAGE	MSI	RECUR	RECUR_DATE	LAST_FU	CHEMO	ALT (IU/L)	AST(IU/L)	Absolute neutrophil count	Albumin(g/dL)	Alkaline phosphatase (lU/L)	BUN (mg/dL)	Basophil (%)	Bilirubin total (mg/dL)	Chloride(serum)(mmol/L)	Creatinine(mg/dL)	Eosinophil (%)	Hb(g/dL)	Lymphocyte (%)	Monocyte (%)	PLT (10³/μL)	Potassium (serum) (mmol/L)	Protein total (g/dL)	Sodium(serum) (mmol/L)	Total Calcium (mg/dL)	WBC(10³/μL)
1	18155660	SAMPLE_18155660	0	79	ascending	0	2022-07-18	3	171.88	50.64	25	0	md (moderately-differentiated adenocarcinomas)	3	0	0	2a	0					9	50	8092	4.7	384	9.1	1.2	1.3	99	2.34	9.4	16.5	9.3	9.8	364	4.9	7.3	142	8.8	9
2	19836717	SAMPLE_19836717	1	58	cecal	0	2022-01-18	2	1.73	3.14	23	0	wd (well-differentiated adenocarcinomas)	1	0	0	1	0			2022-08-17		27	23	8051	4.6	285	9.2	0.8	0.9	106	0.57	2.1	14	46.3	6.2	399	4.2	7.5	140	9.2	7.9
3	10074983	SAMPLE_10074983	0	45	sigmoid	0	2020-09-24	2	5.48	83.15	22	1	md	4a	1a	0	3b	0	0				13	16	2350	4.2	218	17.1	0.8	0.4	104	0.94	4	13.5	39	8.7	270	4.2	6.7	141	8.7	5
4	11132008	SAMPLE_11132008	1	53	rectosigmoid junction	1	2021-12-07	1	1.73	2.06	25	0	md	3	0	0	2a	0			2022-07-20		21	26	2957	4.7	205	8.6	0.7	0.5	106	0.82	2.6	13.3	38.6	7.2	285	4.9	7.6	143	10.4	5.8
5	11359740	SAMPLE_11359740	0	83	ascending	0	2021-09-15	2	5.07	4.7	13	4	pd (poorly-differentiated adenocarcinomas)	4	2a	0	3c	0	1	2022-06-01	2022-08-28		16	19	7032	4.4	219	36.6	0.6	0.6	108	1.51	3.9	9.8	30.4	8.7	414	4.7	7.5	140	8.7	9.1
6	18740107	SAMPLE_18740107	1	64	sigmoid	0	2020-07-21	1	3.66	32.59	29	0	md	1	0	0	1	0					23	23	1840	4.2	148	11.2	1.5	0.9	106	0.66	5.8	13.7	46.1	6.7	244	4.5	7.4	145	9.2	4.6
7	19840760	SAMPLE_19840760	0	61	ascending	0	2021-09-14	1	13.33	2	50	1	md	3	1a	0	3b	0	0		2022-08-04		14	18	8527	4.5	481	20.7	0.5	0.8	104	0.98	4.8	15.8	26	5.7	274	4.3	7	140	8.5	8.4
8	399610	SAMPLE_00399610	0	76	sigmoid	0	2020-07-10	2	7.9	0.01	25	2	md	4	1b	0	3a	0				xelox	16	15	3730	4	188	19.9	1.3	0.5	108	0.99	2.2	10.4	32.6	7.7	413	4.6	6.6	145	9.6	6.5
9	379119	SAMPLE_00379119	1	81	sigmoid	0	2020-02-18	2	_	8.52	26	2	md	4b	1b	0	3c	0					13	21	9390	3.9	167	53.2	0.6	0.6	107	1.29	3.4	13	6.3	7.8	439	4.2	7.4	143	8.6	6.7
10	19808873	SAMPLE_19808873	0	3c	rectal	0	2021-06-11	1	52.39	39.68	16	5	md	3	2a	0	3c	0	0				13	15	4040	3.7	213	16.5	0.4	0.4	106	0.88	2.5	11.6	24.6	9.2	307	3.9	6	140	8.1	6.3
11	10735682	SAMPLE_10735682	1	92	transverse	0	2021-10-15	3	5.52	14.31	22	0	md	4a	0	0	2b	0			2022-01-20		8	25	6883	3.9	348	46.2	0.9	0.5	111	1.87	7.1	8.4	5	6.8	525	4.2	6.9	144	9	8.5
12	19829135	SAMPLE_19829135	0	67	cecal	0	2021-06-23	3	2.53	4.36	22	0	wd	4a	0	0	2b	0					21	24	2784	5.2	169	18.8	0.9	0.7	109	0.91	3.4	11.3	21.8	8.7	235	4.7	6.8	141	9.1	4.8
13	19423777	SAMPLE_19423777	0	39	sigmoid	0	2020-07-09	1	1.73	2.75	34	0	md	1	0	0	1	0			2022-03-03		13	18	1630	4	158	19.4	0.5	0.6	106	0.91	4.9	14.3	43	9.1	242	4.3	6.7	139	8.8	3.8
14	506507	SAMPLE_00506507	1	70	rectal	0	2020-08-28	2	2.27	_	11	0	wd	2	0	0	1	0					21	29	4140	4.5	182	13.5	0.4	0.9	109	0.81	1.1	11.9	46.6	7	316	4.4	7.3	145	9.4	7.4
15	10355257	SAMPLE_10355257	0	82	descending	0	2020-07-10	2	2.38	5.71	17	0	md	3	0	0	2a	0			2022-06-13		15	21	4040	4.1	120	23.3	0.3	0.6	102	1.28	2.4	14.6	37.4	9.1	262	4.3	7.2	140	9.5	7.7
16	18822597	SAMPLE_18822597	0	56	sigmoid	0	2020-10-06	1	<1.73	4.97	32	0	md	3	0	0	2a	0				folfox	84	194	5750	4.2	229	8.6	0.6	1.2	108	0.93	6.6	15.2	27.2	8.5	271	4.8	6.8	143	8.9	7.8
17	18620791	SAMPLE_18620791	0	76	ascending	0	2021-09-28	2	2.92	2	32	3	md	3	1b	0	3b	0	0		2022-08-16		30	29	4231	4.6	225	14	0.4	0.6	101	0.79	1.5	15.1	40.8	7.4	247	4.3	8	139	9.2	8.5
18	370083	SAMPLE_00370083	1	80	ascending		2021-12-29	3	6.42	2.44	18	0	md	1	0	0	1	0			2022-03-07		9	68	9282	3.8	99	47.8	0.5	1.9	111	0.88	3.1	14.1	9.3	8.6	343	5.3	6.6	144	8.5	9.8
19	17704122	SAMPLE_17704122	0	62	rectal	0	2020-02-21	2	3.09	5.51	20	1	pd	3	1a	0	3b	0	0				20	19	2720	4.4	207	11.7	0.7	0.6	101	0.94	1.6	14.4	25.4	11.8	204	4.2	7.1	140	9.5	4.5
20	19740744	SAMPLE_19740744	0	68	rectal	0	2021-06-23	2	1.75	2.34	19	0	wd	3	0	0	2a	0					40	34	9480	4.2	321	9.4	0.4	1.1	108	1.09	1.9	14.2	6.3	7.8	281	4.2	7.4	141	8.5	9.6
21	19078850	SAMPLE_19078850	0	65	ascending	0	2020-08-04	2	111.45	2.06	49	8	md	3	2b	0	3b	0				folfox	20	22	5170	3.9	180	16.6	0.8	0.3	102	0.93	4.8	8.4	21	9.4	450	4.4	7.8	141	9.6	7.1
22	10633630	SAMPLE_10633630	0	85	sigmoid	0	2020-02-21	3	2.73	10.57	33	0	md	4a	0	0	2b	0					23	29	7660	4.4	336	27.5	0.5	0.9	105	0.89	3.4	14.7	26.8	9.7	277	3.7	7.6	140	8.9	9.1
23	361833	SAMPLE_00361833	0	89	sigmoid	0	2021-08-27	3	7.39	2.06	41	0	wd	3	0	0	2a	0					15	21	4669	3.5	299	22.1	0.2	0.2	106	1.21	0.6	13.6	16.6	8.6	184	4.3	5.9	142	7.9	6.3
24	17439860	SAMPLE_17439860	0	76	ascending	0	2020-06-09	2	4.04	3.37	17	0	wd	3	0	0	2a	0					38	49	9290	4	361	21.3	0.4	2	102	1.26	4.2	16.4	9.7	9.1	280	4.5	6.5	140	9.1	9.8
25	17663524	SAMPLE_17663524	1	78	ascending	0	2021-08-17	3	3.38	567.92	27	10	mucinous	3	2b	0	3c	0	1	2021-10-01	2022-09-05		11	16	6436	3.8	199	9	0.5	0.6	111	0.92	2.5	9.7	24.3	9.2	410	4.7	6.7	142	8.2	8.6
26	19830700	SAMPLE_19830700	1	48	sigmoid	0	2021-07-02	1	1.73	4.08	27	0	md	1	0	0	1	0			2021-11-11		16	17	4690	4.5	184	7.7	0.1	0.7	103	0.66	0.6	10.6	26.3	5.7	204	4.6	7.4	139	8.5	7
27	18438846	SAMPLE_18438846	1	44	sigmoid	0	2022-07-31	1	15.98	1164	65	57	signet (signet ring cell carcinoma )	4	2b	0	3c	0	1	2021-10-11	2022-08-01		36	31	2930	4.7	224	12.5	1.2	0.9	104	1.04	1	14.9	31.7	7.5	360	4.2	7.2	141	8.8	6.7
28	19334783	SAMPLE_19334783	0	3c	sigmoid	0	2020-03-31	1	4.29	2.66	16	16	signet	3	2a	0	3c	0	0				15	16	7280	4.3	242	5.6	0.6	0.5	104	0.87	1	8	24.2	8.1	551	3.9	7.3	141	9.9	6.1
29	10040959	SAMPLE_10040959	0	75	sigmoid	0	2021-12-03	2	1.87	4.65	14	0	md	1	0	0	1	0			2022-07-04		46	40	4012	4.1	379	18.8	0.8	0.7	107	1.24	9.6	14	39.2	8	304	4.4	7.1	142	8.6	7.3
30	19485542	SAMPLE_19485542	1	64	sigmoid	0	2020-04-10	1	2.5	10.79	12	0	md	1	0	0	1	0					25	29	2890	4.4	245	14.7	0.8	0.8	105	0.62	2.2	14.4	30	8.9	218	4.4	7.3	141	9.8	5
31	19472717	SAMPLE_19472717	1	79	ascending	0	2020-07-07	3	5.12	39.66	27	4	md	4b	2a	0	3b	0					27	46	6120	3.8	279	19.4	0.5	0.3	104	1.04	5	9.6	29.5	9.3	348	4.7	6.8	141	8.6	8.9
32	17347257	SAMPLE_17347257	0	62	rectosigmoid junction	0	2020-07-17	1	2.26	4.07	13	0	md	2	0	0	1	0					19	21	2380	4.3	261	18.3	0.8	0.4	104	0.84	12	15.9	36.5	10.6	302	4.8	7.5	140	9.1	5.9
33	10112195	SAMPLE_10112195	0	55	sigmoid	1	2022-02-04	1	1.73	3.01	15	0	md	1	0	0	1	0			2022-09-01		19	21	2693	4.2	165	18.1	0.8	0.6	107	0.9	2.1	13.4	42.9	10.4	248	4	7.4	140	9	6.2
34	417340	SAMPLE_00417340	0	86	sigmoid	0	2020-08-20	2	<1.73	4.66	25	0	md	3	0	0	2a	0					9	19	6260	3.7	227	9.5	0.5	0.8	111	1.13	7.3	9.9	5.6	9.9	277	4.2	6.8	143	9	8.3
35	19756484	SAMPLE_19756484	0	40	rectosigmoid junction	0	2021-05-21	1	1.73	5.17	12	0	md	1	0	0	1	0					71	84	3170	4.8	151	14.6	0.3	0.5	106	1.13	3	16.3	41.6	5.8	271	5.5	6.8	144	9.4	6.4
36	16857845	SAMPLE_16857845	1	46	sigmoid	0	2020-08-17	2	<1.73	<2.06	21	1	md	3	1a	0	3b	0				xelox	10	14	4750	3.9	100	9.5	0.5	0.4	108	0.66	1.1	9.4	31.6	8.4	447	4.6	7.3	141	8.9	8.1
37	347423	SAMPLE_00347423	1	48	rectal	0	2021-09-17	1	23.16	8.7	20	0	md	2	0	0	1	0			2022-09-01		9	18	3537	4.3	164	8.6	0.3	0.4	106	0.67	1.9	10.8	34.5	9.6	259	4.1	6.6	141	8.4	5.8
38	17069401	SAMPLE_17069401	1	55	ascending	0	2022-01-25	1	19.08	2028.43	22	0	md	3	0	0	2a	0					17	22	3392	3.9	160	9.3	0.2	0.4	101	0.61	4.3	10.1	26	5.5	267	3.8	6.2	136	7.9	5.3
39	19593289	SAMPLE_19593289	0	76	rectosigmoid junction	0	2020-09-10	2	4.85	27.42	18	13	pd	2	2b	0	3b	0	1	2022-06-20			10	12	4320	3.8	312	18.8	0.3	1.3	106	0.93	2	13.4	23.8	5.8	249	4.2	7.1	141	8.6	6.4
40	19504049	SAMPLE_19504049	0	49	sigmoid	0	2020-06-30	1	3.47	2.06	15	1	md	3	1a	0	3b	0	1	2022-04-15		av+folfox	31	30	3320	4.4	202	13.1	0.4	0.9	103	0.87	2.6	16	41.4	6.9	302	4.3	8.2	142	9	6.8
41	19846049	SAMPLE_19846049	0	61	sigmoid	0	2021-11-12	1	6.11	7.96	23	0	wd	3	0	0	2a	0					9	13	5392	4.3	102	13.8	0.8	0.4	101	0.66	3.2	14.5	34.4	5.6	288	3.9	6.5	140	8.5	9.6
42	19445582	SAMPLE_19445582	0	70	rectal	0	2020-02-14	2	13.27	8.32	8	0	md	3	0	0	2a	0					11	17	4070	5.1	214	13.2	0.8	1.1	102	1.07	2.3	10.1	21.5	9	211	4.8	8.2	139	8.4	6.8
43	468963	SAMPLE_00468963	1	51	ascending	0	2021-06-29	1	1.73	2.77	31	0	md	1	0	0	1	0			2022-06-14		21	18	3220	4.9	336	11.4	0.5	0.6	106	0.56	1.7	14	34.7	7	178	4.2	8.1	143	9.1	5.7
44	468931	SAMPLE_00468931	0	74	rectosigmoid junction		2022-01-07	2	3.21	3.22	14	0	md	2	0	0	1	0					32	37	7701	5.1	324	13.5	2.1	1.6	104	1.07	1.3	13.2	38.7	7.5	376	4.4	6.8	140	8.6	6.4
45	19841184	SAMPLE_19841184	0	84	ascending	0	2021-09-17	3	1.73	4	21	0	md	2	0	0	1	0					6	13	5421	3.1	215	20.7	0.3	0.4	105	1.55	2	9.2	29.7	7.9	155	4.1	5.9	139	8.3	7.2
46	19847886	SAMPLE_19847886	1	52	sigmoid	1	2021-12-21	2	3	2.06	37	0	md	4a	0	0	2b	0			2022-08-26		18	15	4843	3.6	186	9.6	0.3	0.4	107	0.62	3.7	11.2	21.2	6.9	358	4.4	5.8	139	8.1	6.4
47	349011	SAMPLE_00349011	0	76	ascending	0	2020-06-16	2	5.76	0.1	33	0	md	3	0	0	2	0					12	18	4770	3.8	280	13.5	0.7	0.3	107	0.79	5.7	10.7	34.5	8	349	4.6	6.8	142	8.6	9.3
48	10760448	SAMPLE_10760448	1	65	hepatic flexure	0	2020-03-05	1	2.55	3.24	31	0	wd	1	0	0	1	0					15	25	3460	4.2	199	9.1	0.6	0.7	105	0.63	0.5	13.1	45.1	7.6	262	4	8	140	8.9	6.7
49	19540038	SAMPLE_19540038	0	57	sigmoid	0	2020-06-29	1	1.19	1.18	15	0	md	1	0	0	1	0					48	29	3540	4.2	257	10.5	0.7	0.4	106	0.74	1.9	14.9	43	5.9	298	4.3	6.8	141	9	7.3
50	18522424	SAMPLE_18522424	0	69	ascending	0	2021-06-29	2	1.78	2.35	28	0	wd	3	0	0	2a	0			2022-06-09		9	15	4426	3.8	281	11.4	1.1	0.4	107	0.89	4.3	8.3	32	9	392	4.3	6.9	140	9.4	7.4
51	17667711	SAMPLE_17667711	0	56	cecal	0	2020-04-01	1	3.57	7.4	14	0	wd	1	0	0	1	0					46	29	7170	4.3	179	17	0.6	0.6	107	1.1	5.6	16.7	33.4	8.4	219	4.7	7.2	141	9.7	9.1
52	17190468	SAMPLE_17190468	0	47	ascending	0	2022-01-25	2	13.3	58.61	19	13	mucinous	3	1b	0	3a	0	0		2022-08-30		19	23	4269	4.4	213	18.3	0.4	0.3	107	0.88	3.7	9.8	46.5	6.3	434	4.6	7.4	142	8.8	9.2
53	10996704	SAMPLE_10996704	0	84	ascending	0	2020-07-28	2	1.82	6.41	16	2	md	3	1b	0	3b	0	1				18	32	6911	4.5	171	18.9	0.4	0.8	109	1	2.1	9.9	10.1	9	301	4.4	7	131	8.7	8.8
54	10136540	SAMPLE_10136540	0	85	ascending	0	2020-09-17	2	3.99	<2.06	15	0	md	3	0	0	2a	0					9	45	3120	3.6	370	31.9	0.8	0.6	110	1.54	5	9.4	37.6	17.4	218	5.2	6.7	143	8.8	5.5
55	467498	SAMPLE_00467498	1	73	sigmoid	0	2020-04-06	2	4.49	1.39	14	0	md	2	0	0	1	0					28	29	5490	4.4	196	21.5	0.7	0.6	108	0.84	3.4	13.2	36.7	8.7	260	3.9	8	144	9.6	8
56	17491123	SAMPLE_17491123	1	81	ascending	0	2021-11-12	3	9.81	1009.76	35	1	pd	4b	1a	0	3b	0	0				12	46	6324	2.8	521	12	0.4	0.5	106	0.49	3.5	9.2	20.2	7.6	514	4.3	5.9	138	7.4	9.3
57	450834	SAMPLE_00450834	0	78	sigmoid	0	2020-08-18	3	4.8	15.4	16	3	md	3	1	0	3b	0	0				27	21	6990	4	385	13.6	0.4	0.9	106	0.94	3.1	14.1	34.5	7	254	4.6	7	145	9.1	8.7
58	400004	SAMPLE_00400004	1	75	rectal	0	2020-04-29	3	6.08	9.51	18	8	md	3	2b	0	3c	0				xeloda	52	49	3840	4.1	399	20.4	0.5	0.8	107	0.7	0.3	15.1	33.4	6.8	212	3.9	7.3	141	9.2	6.5
59	11144342	SAMPLE_11144342	1	74	sigmoid	0	2020-03-17	2	1.77	0.22	10	0	md	3	0	0	2	0					40	49	5940	3.7	282	8.6	0.6	0.6	116	5.17	2.6	9.7	5.8	9.6	99	4.9	6.6	142	8.9	7.5
60	409698	SAMPLE_00409698	0	78	rectal	0	2020-03-13	2	2.42	1528	12	6	md	3	2a	0	3c	0	1	2020-05-14		av+folfi	13	23	4490	4.5	325	9	0.5	0.8	99	1.14	4.3	15.8	32.2	8.4	241	4.2	7.9	142	9.5	7.2
61	19837933	SAMPLE_19837933	0	55	ascending	0	2021-08-27	1	2.31	432.62	28	3	md	4a	1b	0	3b	0	1	2022-04-02			46	31	3100	4.3	232	11.8	0.2	0.5	95	1.12	0.9	14.2	34	10.5	318	3.9	6.9	137	8.8	5.7
62	11294843	SAMPLE_11294843	1	67	ascending	0	2020-04-08	2	1,85	5.24	22	7	mucinous	3	2b	0	3b	0					16	20	4010	4.3	341	18.8	0.7	0.5	105	0.7	4.3	13.2	25.2	9.3	277	4	7.4	144	9.5	6.2
63	16959020	SAMPLE_16959020	1	77	ascending	0	2021-06-16	2	37.46	2.87	36	12	md	4b	2b	0	3c	0	1	2022-04-01	2022-08-22		23	24	2680	4.5	254	13.3	0.6	0.8	106	0.6	1.4	13.3	35.9	8.2	172	3.9	7.2	141	8.7	5
64	10249840	SAMPLE_10249840	0	55	rectal	0	2020-07-24	2	14.24	17.88	25	0	md	3	0	0	2a	0					22	18	5030	4.2	246	7.9	0.5	0.4	103	0.75	3.8	13	27.9	10.2	249	4	7.5	140	8.7	5.8
65	10875814	SAMPLE_10875814	1	79	rectal	0	2020-10-06	2	0.92	2.65	8	3	nd	3	1b	0	3b	0				xeloda	33	19	2701	3.9	149	15.8	0.7	0.9	109	0.66	5.4	14.3	23.6	8.1	214	4.3	5.3	141	8.9	6.8
66	10850985	SAMPLE_10850985	1	68	ascending	0	2021-10-13	3	22.22	282.02	26	0	md	3	0	0	2a	0			2022-07-27		23	26	2480	5.1	119	15.2	0.4	0.7	114	0.87	6.2	13.1	26.2	9.9	261	4.2	7.2	144	8.8
67	471082	SAMPLE_00471082	1	85	sigmoid	0	2020-04-20	1	6.96	11.25	32	0	pd	3	0	0	2a	0					13	19	8190	3.8	194	18.7	1.4	0.5	106	0.79	2.9	12.3	41.2	8.8	363	4.4	6.8	140	9.7	9.5
68	430592	SAMPLE_00430592	0	83	ascending	0	2020-07-09	2	5.08	3.56	29	2	md	3	1b	0	3a	0					8	31	4090	4	340	19.7	0.6	0.7	99	0.91	0.7	13.3	26.7	9.6	354	4.5	6.8	139	9	5.9
69	10974898	SAMPLE_10974898	0	87	ascending	0	2020-04-24	2	6.49	5.25	26	0	md	3	0	0	2a	0					13	39	5250	3.4	156	9.9	0.3	1.4	99	0.68	3.3	9.6	30.1	9.4	267	4.6	6	141	9.2	6.3
70	16920705	SAMPLE_16920705	0	85	sigmoid	0	2021-10-15	2	3.14	3.26	24	4	md	3	2a	0	3c	0	0		2022-04-25		8	26	7692	3.7	203	32.6	0.7	0.5	108	1.68	1.5	9.5	6.1	8.9	333	4.7	7.6	136	8.4	9.1
71	19576772	SAMPLE_19576772	0	53	rectosigmoid junction	0	2020-08-05	1	58.35	254.9	20	0	md	3	0	0	2	0					13	16	6630	3.7	306	11	1	0.4	101	0.74	6.6	12.3	21.6	9.1	385	4.8	7.6	140	9.1	9.7
72	19010025	SAMPLE_19010025	0	62	ascending	0	2020-03-17	2	48.98	2.09	38	0	mucinous	4	0	0	2b	0					12	15	6540	4	160	20.1	0.6	0.4	102	1	1.2	13.4	29.4	7.1	456	4.8	6.9	143	9.3	10.6
73	19177764	SAMPLE_19177764	0	82	sigmoid	0	2021-12-28	3	8.9	14.63	34	5	md	4a	2a	0	3c	0	0		2022-07-01		9	16	4810	4.2	164	20.3	0.6	0.6	106	1.02	1.4	13	26.9	9.5	241	4.5	7.4	140	8.8	7.2
74	19737250	SAMPLE_19737250	1	77	sigmoid	0	2022-01-14	3	13.21	46.87	31	0	md	3	0	0	2a	0			2022-08-29		83	79	5930	4.4	243	19.1	0.4	0.7	105	1.06	0.3	14	33.2	4	212	5	7.7	144	9.1	9.6
75	18903667	SAMPLE_18903667	0	67	transverse	0	2022-02-04	1	2.3	3.12	25	16	wd	4	2b	0	3c	0	0		2022-06-13		8	27	4294	3.9	271	8.6	0.8	1	107	0.79	5.3	9.7	33.3	8.7	469	4.3	6.6	139	8.2	7
76	17973120	SAMPLE_17973120	0	51	sigmoid	0	2021-09-10	1	1.73	2.04	23	0	md	1	0	0	1	0			2022-09-05		15	15	3803	4.6	233	13	0.6	0.4	103	0.97	1.2	14.5	29.5	10	239	4.6	7.3	141	8.9	6.5
77	428069	SAMPLE_00428069	0	76	ascending	0	2020-06-23	3	1.77	4.51	32	0	md	3	0	0	3b	0					24	32	2440	4	310	20.6	1.7	1.9	107	1.28	4	9.5	45.3	9.4	334	4.3	6.5	142	9	5.1
78	16647606	SAMPLE_16647606	0	78	ascending	0	2022-01-26	1	1.9	26.98	34	3	md	3	1b	0	3c	0	0		2022-08-13		30	32	3671	3.9	225	15.2	0.9	0.5	105	0.94	3.9	14.2	26.5	12.9	325	4.2	7.2	141	8.5	5.8
79	16511459	SAMPLE_16511459	1	84	ascending	0	2022-01-10	3	3.29	14.25	14	0	md	1	0	0	1	0			2022-08-05		27	24	6742	3.3	273	8.3	0.9	0.5	114	0.64	5.3	9.8	26.2	9.2	209	4.1	6.2	144	8.6	8.5
80	19828808	SAMPLE_19828808	0	40	rectal	0	2021-07-30	1	2.14	2.06	28	1	md	1	1	0	3a	0					30	23	3410	4.3	142	13.5	0.6	0.5	106	0.88	3.1	13.9	37.5	8.2	297	3.9	6.8	141	8.4	6.7
81	17033387	SAMPLE_17033387	1	79	sigmoid	0	2021-05-04	1	5.81	14.49	31	6	md	3	2a	0	3c	0	0		2022-08-16		8	46	6750	4	268	52.8	0.8	0.7	99	1.59	4.1	9.4	36.3	8.9	283	4.4	6.9	146	8.6	9.5
82	19476175	SAMPLE_19476175	0	67	ascending	0	2020-05-12	2	2.23	2.02	12	0	we	1	0	0	1	0			2022-09-01		35	49	9860	4.3	98	72.1	0.6	0.9	99	2.93	4.1	9.8	9.6	9.1	367	5.5	7.9	154	9.2	9.7
83	313848	SAMPLE_00313848	0	60	rectosigmoid junction	0	2020-02-11	2	889.73	4322.47	13	4	pd	3	2a	0	3b	0	1			ava+folfox	11	26	2920	4.2	175	11.1	0.4	0.4	106	0.85	3.1	13.1	50.7	8.2	341	4.5	7	142	9.8	7.8
84	10786589	SAMPLE_10786589	0	74	ascending	0	2021-09-28	1	1.73	2.06	32	0	wd	1	0	0	1	0			2022-04-18		14	21	3549	4.6	215	26.5	0.4	0.4	112	1.71	2.4	8.4	35.6	8.8	238	4.9	7.4	139	8.6	5.2
85	19012627	SAMPLE_19012627	0	83	ascending	0	2020-04-24	3	6.91	5.08	18	0	md	3	0	0	2a	0					35	36	4680	3.9	311	34.2	0.4	1.4	110	1.28	4.1	17.2	8	8.3	260	4.7	6.9	143	9.2	7.7
86	322035	SAMPLE_00322035	1	84	ascending	0	2020-05-03	3	4.59	11.96	13	0	md	3	0	0	2a	0					21	32	9910	2.9	343	9.7	0.4	0.5	98	0.65	2.3	8.9	9.8	9	375	4.1	5.7	139	8.1	8.3
87	18310575	SAMPLE_18310575	1	79	rectosigmoid junction	0	2021-06-29	1	125	11	26	4	pd	4a	2a	0	3c	0	0				13	22	7030	4.2	124	19.8	0.2	0.2	100	1.01	1.9	9.7	8.8	9	294	4.1	6.4	133	8.5	8.7
88	456567	SAMPLE_00456567	0	66	rectal	0	2020-03-27	2	1.46	29.8	17	0	md	2	0	0	1	0					19	21	2620	4.4	152	16.6	0.2	0.6	103	0.96	2.6	14.7	40.1	7.7	248	3.9	7	140	9.1	5.3
89	19590336	SAMPLE_19590336	1	86	sigmoid	0	2020-09-23	3	8.7	28.4	18	0	md	3	0	0	2	0					8	17	3970	3.7	185	14.7	0.5	0.5	105	0.8	0.9	9.5	29.5	7.6	293	4	7.1	139	8.6	5.8
90	18803921	SAMPLE_18803921	1	75	rectal	0	2020-06-05	2	0.91	3.07	17	0	md	2	0	0	1	0					23	22	3630	4.5	160	9.9	0.1	0.7	103	0.65	1.3	14	39.3	5.7	271	4	7.4	143	9.8	6.8
91	19832009	SAMPLE_19832009	0	2a	sigmoid	0	2022-08-23	1	2.05	17.03	26	0	wd	2	0	0	1	0			2022-05-31		25	20	2823	4.6	172	17	1.1	1.5	105	0.74	5.1	14.5	38.9	9.9	337	5.1	7.1	140	9.1	5.2
92	19847156	SAMPLE_19847156	0	57	sigmoid	0	2021-12-03	1	2.19	2.53	15	0	md	3	0	0	2a	0			2022-06-13		31	27	3200	4.1	264	17.2	0.5	0.5	107	0.85	8.1	15.7	36.7	6.5	142	4.5	6.8	142	8.6	6.6
0 : male
1 : female

## Sheet: Table S2
Supplementary Table S2. The alpha diversity of microbiota in fecal samples from CRC patients and healthy control group
Sample-id	Observed features	Chao1 index	Shannon's index	Simpson's index	Pielou's evenness	group_type
313848	31	31.5	1.92874	0.445493	0.389315	M.CRC
322035	31	32.4286	1.3665	0.362525	0.275828	F.CRC
347423	105	105	5.04243	0.929281	0.751004	F.CRC
349011	171	182	5.7227	0.959297	0.771477	M.CRC
361833	130	142.353	4.23918	0.851523	0.603668	M.CRC
370083	198	227.176	5.54322	0.921915	0.726565	F.CRC
379119	16	16.5	0.532657	0.12105	0.133164	F.CRC
399610	118	118.6	5.70559	0.967973	0.828983	M.CRC
400004	92	92.2	5.52111	0.95507	0.846334	F.CRC
409698	35	35	3.57426	0.815766	0.696833	M.CRC
417340	84	84.75	3.63317	0.788691	0.568364	M.CRC
428069	69	73.4	2.89525	0.741808	0.473969	M.CRC
430592	46	46	4.78401	0.946923	0.866109	M.CRC
450834	236	265.118	6.22503	0.967101	0.789714	M.CRC
456567	127	133.429	5.67524	0.962295	0.812062	M.CRC
467498	81	85.5	4.26321	0.884725	0.672446	F.CRC
468931	141	149.885	4.65096	0.878547	0.651436	M.CRC
468963	61	70.5455	2.4035	0.617541	0.405262	F.CRC
471082	88	88	5.11829	0.936501	0.792374	F.CRC
506507	74	75.2	4.69479	0.927533	0.756071	F.CRC
10040959	65	71	2.93995	0.669799	0.488172	M.CRC
10074983	193	206.034	6.15162	0.971613	0.810228	M.CRC
10112195	145	150.526	5.41886	0.936989	0.754725	M.CRC
10136540	186	197.875	6.32155	0.974878	0.838495	M.CRC
10249840	77	78	4.94089	0.925345	0.788425	M.CRC
10355257	143	145.143	5.91265	0.965969	0.825804	M.CRC
10633630	107	117.909	4.34648	0.900986	0.644738	M.CRC
10735682	49	51	2.88834	0.741438	0.514424	F.CRC
10760448	127	128.111	5.64859	0.952966	0.808249	F.CRC
10786589	79	87.5	3.039	0.791412	0.482091	M.CRC
10850985	171	193.235	5.87769	0.967201	0.79237	F.CRC
10875814	83	85.1429	4.83048	0.941734	0.757717	F.CRC
10974898	28	30.5	2.04116	0.678505	0.42459	M.CRC
10996704	110	117.059	4.70866	0.917248	0.694354	M.CRC
11132008	115	125.5	5.14075	0.943446	0.750969	F.CRC
11144342	46	47.5	2.42463	0.607871	0.438962	F.CRC
11294843	55	55	3.10729	0.71971	0.537467	F.CRC
11359740	130	137.5	4.92006	0.91708	0.700626	M.CRC
16511459	41	42.5	2.65333	0.749593	0.49525	F.CRC
16647606	126	138.364	5.42624	0.955164	0.777701	M.CRC
16857845	150	157.5	5.21089	0.892215	0.72085	F.CRC
16920705	175	188.053	4.71656	0.896489	0.632992	M.CRC
16959020	249	280.571	6.12133	0.960858	0.769011	F.CRC
17033387	119	122	5.15728	0.935542	0.747993	F.CRC
17069401	136	155.25	5.5838	0.961106	0.787841	F.CRC
17190468	134	157.077	5.23182	0.937055	0.740412	M.CRC
17347257	63	64.5	4.44475	0.920211	0.743607	M.CRC
17439860	119	119.25	5.35279	0.944353	0.77635	M.CRC
17491123	125	148	5.5378	0.96482	0.795001	F.CRC
17663524	129	130.071	5.73904	0.9656	0.81855	F.CRC
17667711	144	152.571	5.12181	0.912672	0.714346	M.CRC
17704122	51	51.4615	3.05675	0.771166	0.538879	M.CRC
17973120	182	198.235	6.03797	0.967349	0.804227	M.CRC
18155660	152	157.571	5.94298	0.967581	0.819955	M.CRC
18310575	116	125.562	4.92526	0.932795	0.71818	F.CRC
18438846	202	235.476	6.20341	0.974913	0.810034	F.CRC
18522424	100	109.067	4.05316	0.884918	0.610062	M.CRC
18620791	177	192.333	5.74464	0.948358	0.769275	M.CRC
18740107	76	76.375	4.53125	0.92339	0.72524	F.CRC
18803921	145	148.438	5.52735	0.952154	0.769836	F.CRC
18822597	42	42.1667	1.9637	0.483176	0.364166	M.CRC
18903667	146	154.261	5.8195	0.97067	0.809408	M.CRC
19010025	125	128	5.57296	0.955941	0.800048	M.CRC
19012627	143	147.667	6.12688	0.975161	0.855725	M.CRC
19078850	145	147.154	6.14019	0.976328	0.85519	M.CRC
19177764	116	142.4	4.3929	0.891612	0.640553	M.CRC
19423777	135	168.067	5.14194	0.944258	0.726589	M.CRC
19445582	96	96	5.72578	0.96632	0.869524	M.CRC
19472717	10	10	1.22697	0.410803	0.369354	F.CRC
19476175	129	136.5	4.98935	0.927883	0.711623	M.CRC
19485542	68	68	5.51063	0.970981	0.905243	F.CRC
19504049	158	160.25	6.14041	0.972932	0.840717	M.CRC
19540038	35	35	3.15994	0.751237	0.61606	M.CRC
19576772	164	170	5.50259	0.926429	0.747883	M.CRC
19590336	109	114.6	5.2393	0.948149	0.774107	F.CRC
19593289	124	137	5.41029	0.943149	0.777989	M.CRC
19737250	61	64.6	3.25252	0.799668	0.548418	F.CRC
19740744	44	46.5455	1.11852	0.2577	0.204878	F.CRC
19756484	155	161.067	5.61504	0.945773	0.771707	M.CRC
19828808	50	53.5	2.24192	0.597187	0.397232	M.CRC
19829135	20	21	2.64868	0.77552	0.612846	M.CRC
19830700	133	150.273	5.06025	0.922511	0.717228	F.CRC
19836717	132	138	5.53294	0.953316	0.785438	F.CRC
19837933	116	125.625	4.47131	0.884286	0.651987	M.CRC
19840760	88	98.9091	3.92247	0.841277	0.607246	M.CRC
19841184	160	169.545	5.77285	0.958296	0.788433	M.CRC
19846049	52	52	4.50865	0.924889	0.790929	M.CRC
19847156	130	137.773	4.23121	0.880021	0.602533	M.CRC
19847886	87	87.3333	4.95634	0.94271	0.769267	F.CRC
ERS3644406	111	123	5.02545	0.941477	0.739644	F.Normal
ERS3644407	145	174	5.41386	0.954204	0.754028	F.Normal
ERS3644408	247	263.5	6.86826	0.986447	0.864109	F.Normal
ERS3644409	92	101.429	4.99493	0.948692	0.765676	F.Normal
ERS3644410	152	167.75	5.22888	0.945981	0.721431	F.Normal
ERS3644411	176	190.625	5.85862	0.960813	0.785398	F.Normal
ERS3644412	124	141.885	4.48796	0.917463	0.64536	F.Normal
ERS3644413	232	252.067	6.23749	0.974481	0.793777	F.Normal
ERS3644415	116	123.773	3.95353	0.813754	0.576486	F.Normal
ERS3644416	141	172.071	5.13534	0.929437	0.71928	F.Normal
ERS3644417	141	145.55	5.4359	0.950513	0.761378	F.Normal
ERS3644418	190	207.5	5.21991	0.922224	0.689565	F.Normal
ERS3644419	150	181.955	5.42277	0.960085	0.75016	M.Normal
ERS3644421	258	295.561	6.26221	0.964092	0.781679	F.Normal
ERS3644422	80	91	4.83967	0.942154	0.765537	F.Normal
ERS3644423	227	273.941	6.10087	0.968285	0.77951	M.Normal
ERS3644425	217	230.533	6.33946	0.976505	0.816777	F.Normal
ERS3644426	145	150.938	5.18122	0.946217	0.721627	M.Normal
ERS3644428	100	103.75	4.80652	0.90973	0.723454	F.Normal
ERS3644430	99	100.111	5.13777	0.954786	0.775003	F.Normal
ERS3644432	173	203.875	5.24134	0.9301	0.704991	F.Normal
ERS3644433	40	40	2.99644	0.73128	0.563037	F.Normal
ERS3644435	143	155.833	5.29619	0.949414	0.739705	F.Normal
ERS3644436	186	208.556	6.03685	0.969087	0.800733	F.Normal
ERS3644437	125	134.562	5.22287	0.953776	0.749789	M.Normal
ERS3644438	56	56.8571	3.78614	0.866336	0.651955	M.Normal
ERS3644441	128	147.118	4.80577	0.923655	0.686538	F.Normal
ERS3644442	87	104	4.3698	0.9128	0.67823	F.Normal
ERS3644443	124	130	5.38937	0.958553	0.774981	F.Normal
ERS3644450	135	144.545	5.48754	0.960495	0.775425	F.Normal
ERS3644451	176	206.875	5.72314	0.965819	0.767236	F.Normal
ERS3644452	242	294.528	5.82057	0.940792	0.735026	F.Normal
ERS3644453	91	94.75	4.47876	0.905239	0.688215	M.Normal
ERS3644454	168	179.111	5.5438	0.947714	0.74994	F.Normal
ERS3644455	93	105	4.1296	0.883527	0.631518	M.Normal
ERS3644456	188	213.143	6.08653	0.97222	0.805673	F.Normal
ERS3644457	109	116.333	5.24364	0.95068	0.774748	F.Normal
ERS3644462	84	87.4615	4.18567	0.891318	0.654797	M.Normal
ERS3644464	120	124.105	4.87325	0.933088	0.705564	F.Normal
ERS3644465	71	71.7143	3.97251	0.886766	0.645963	F.Normal
ERS3644467	139	168.333	5.30527	0.954457	0.745233	F.Normal
ERS3644468	110	114.875	5.01381	0.944134	0.739352	F.Normal
ERS3644469	131	146.261	4.69914	0.897663	0.668115	M.Normal
ERS3644470	191	212.12	6.07504	0.968543	0.801728	F.Normal
ERS3644472	116	132.235	4.39265	0.876411	0.640516	M.Normal
ERS3644474	143	151.903	4.87465	0.922983	0.680829	F.Normal
ERS3644475	121	138.769	4.98592	0.937216	0.720627	F.Normal
ERS3644476	153	166.636	5.75008	0.965636	0.792308	M.Normal
ERS3644478	151	182.955	5.0532	0.934881	0.69811	F.Normal
ERS3644479	185	232.045	5.71331	0.962668	0.758601	F.Normal
ERS3644483	171	186.529	5.31835	0.952445	0.716966	F.Normal
ERS3644484	231	259.12	6.24945	0.961458	0.795931	F.Normal
ERS3644485	130	145.812	4.78388	0.908333	0.681234	F.Normal
ERS3644486	113	113.316	5.11974	0.940362	0.750675	F.Normal
ERS3644487	166	215.789	5.69439	0.968275	0.772116	F.Normal
ERS3644489	220	237	6.34618	0.976244	0.815561	F.Normal
ERS3644492	231	251.086	6.31896	0.973531	0.804783	F.Normal
ERS3644493	227	263.833	5.87669	0.958076	0.750866	F.Normal
ERS3644495	266	301	6.53784	0.975783	0.811622	M.Normal
ERS3644497	175	199	5.35096	0.934142	0.718133	M.Normal
ERS3644498	231	250	6.40838	0.977912	0.816172	M.Normal
ERS3644499	270	312.977	6.47308	0.975001	0.801439	F.Normal
ERS3644500	183	203.667	6.04704	0.973978	0.804587	F.Normal
ERS3644502	265	304.357	6.43549	0.97656	0.799455	F.Normal
ERS3644503	238	280.429	6.17248	0.963879	0.78184	M.Normal
ERS3644505	161	183	5.59531	0.960633	0.763248	F.Normal
ERS3644507	151	166.789	5.34683	0.942049	0.738675	F.Normal
ERS3644508	91	99.75	4.65374	0.927175	0.715103	M.Normal
ERS3644509	253	290.658	6.66056	0.983119	0.834344	F.Normal
ERS3644510	108	119.875	4.46129	0.897051	0.660453	F.Normal
ERS3644511	114	132.4	4.57197	0.918683	0.669111	M.Normal
ERS3644512	211	242.875	5.69537	0.953024	0.737637	F.Normal
ERS3644513	133	146.636	4.63547	0.892841	0.657021	F.Normal
ERS3644514	127	148.857	5.15394	0.921012	0.737469	F.Normal
ERS3644515	159	174.75	5.3921	0.954766	0.737343	F.Normal
ERS3644516	215	235.086	6.26884	0.975839	0.809071	M.Normal
ERS3644517	174	185.04	5.81404	0.962633	0.781148	M.Normal
ERS3644519	202	227.615	6.09691	0.971566	0.796128	F.Normal
ERS3644520	168	181.5	5.66618	0.965139	0.766495	F.Normal
ERS3644521	284	344	6.6069	0.979612	0.810687	F.Normal
ERS3644524	244	289	6.49269	0.979838	0.818674	F.Normal
ERS3644525	153	165.545	5.8132	0.968088	0.801005	F.Normal
ERS3644526	120	147.273	5.22776	0.955283	0.756891	F.Normal
ERS3644527	184	218.167	5.67658	0.95821	0.754508	F.Normal
ERS3644528	268	309.325	6.48892	0.973345	0.80447	F.Normal
ERS3644530	178	206.12	5.62966	0.955116	0.753057	F.Normal
ERS3644531	223	245.941	5.56796	0.937332	0.713759	F.Normal
ERS3644532	304	353.171	7.05303	0.987159	0.855128	M.Normal
ERS3644534	119	135.5	4.99323	0.942917	0.724201	F.Normal
ERS3644535	270	326.269	5.899	0.951287	0.730362	F.Normal
ERS3644536	214	222.775	6.04406	0.966724	0.780738	F.Normal
ERS3644540	155	188.067	4.91651	0.896777	0.675705	F.Normal
ERS3644542	193	249.4	6.14645	0.97664	0.809547	F.Normal
ERS3644543	184	201.531	5.90442	0.969901	0.784791	F.Normal
ERS3644544	162	179.652	5.68984	0.962237	0.775198	F.Normal
ERS3644545	255	310.618	6.50119	0.978724	0.813223	F.Normal
ERS3644546	229	271.5	5.90869	0.956615	0.753735	F.Normal
ERS3644547	234	291.033	6.29074	0.975689	0.799295	F.Normal
ERS3644549	237	282	6.17694	0.972049	0.783007	F.Normal
ERS3644550	188	218.273	6.00886	0.969207	0.795392	M.Normal
ERS3644554	217	248.333	5.69487	0.95439	0.733728	M.Normal
ERS3644556	203	236.786	5.78014	0.963376	0.754062	M.Normal
ERS3644557	248	278.625	6.62426	0.981402	0.8328	M.Normal
ERS3644558	110	124.438	4.99892	0.949513	0.737156	F.Normal
ERS3644559	150	158.161	5.12942	0.942312	0.709579	F.Normal
ERS3644562	97	112	4.77218	0.940934	0.723067	F.Normal
ERS3644563	170	188.37	5.47857	0.951209	0.739408	F.Normal
ERS3644566	108	138	4.78946	0.939328	0.709036	F.Normal
ERS3644567	157	188.2	5.39856	0.95377	0.740074	F.Normal
ERS3644568	195	236.25	5.97475	0.967096	0.785394	F.Normal
ERS3644569	128	147.375	4.23213	0.864452	0.60459	M.Normal
ERS3644571	154	178.391	5.38743	0.947234	0.741377	F.Normal
ERS3644572	128	144.867	4.99843	0.938672	0.714061	F.Normal
ERS3644573	150	170.778	5.1418	0.947413	0.711291	M.Normal
ERS3644574	159	189	5.31095	0.946907	0.726245	M.Normal
ERS3644575	164	195.889	5.35746	0.947392	0.728158	F.Normal
ERS3644576	138	157.25	4.81941	0.902928	0.677976	F.Normal
ERS3644577	142	167.833	5.17502	0.948308	0.723804	F.Normal
ERS3644578	80	89.5455	4.06661	0.898184	0.643255	F.Normal
ERS3644579	133	149.667	5.16164	0.935824	0.731599	F.Normal
ERS3644581	161	183.037	4.79501	0.889027	0.654081	F.Normal
ERS3644582	166	196.875	4.84762	0.890311	0.657301	F.Normal
ERS3644583	133	158.071	5.19451	0.942893	0.736258	F.Normal
ERS3644584	140	151.5	5.62384	0.965443	0.788837	F.Normal
ERS3644585	101	112.769	4.21702	0.883911	0.633356	F.Normal
ERS3644586	82	87	4.02969	0.881346	0.633844	M.Normal
ERS3644587	145	172.75	4.70977	0.916493	0.655965	F.Normal
ERS3644588	184	193.848	5.85627	0.964231	0.778391	F.Normal
ERS3644590	219	271.286	6.08702	0.972437	0.782918	F.Normal
ERS3644591	167	211.4	5.76105	0.963043	0.780239	F.Normal
ERS3644592	228	273.026	5.87784	0.953601	0.750405	F.Normal
ERS3644593	176	208.621	5.38838	0.944319	0.722358	F.Normal
ERS3644594	90	111	3.66123	0.835792	0.563972	F.Normal
ERS3644595	276	345.837	6.04871	0.953387	0.745969	F.Normal
ERS3644596	224	251.237	6.22817	0.971115	0.797731	M.Normal
ERS3644597	138	156	5.33593	0.950793	0.750638	F.Normal
ERS3644598	183	212.286	5.67876	0.962637	0.755586	F.Normal
ERS3644599	262	317.857	6.23128	0.971086	0.77567	F.Normal
ERS3644600	127	139.158	4.9822	0.921986	0.712896	F.Normal
ERS3644601	254	305.773	5.76042	0.936515	0.721072	M.Normal
ERS3644602	229	305.607	6.15385	0.973842	0.785009	M.Normal
ERS3644604	174	198	5.78078	0.966363	0.77668	F.Normal
ERS3644608	165	201.25	5.87996	0.967471	0.798222	F.Normal
ERS3644610	170	199.64	5.3141	0.941663	0.717212	F.Normal
ERS3644611	139	157.9	4.99253	0.928806	0.701302	F.Normal
ERS3644613	169	191.957	5.45381	0.947284	0.736913	F.Normal
ERS3644614	280	340.022	6.29747	0.971296	0.774665	F.Normal
ERS3644615	230	278.065	5.42447	0.933483	0.691412	F.Normal
ERS3644616	184	213.292	6.03916	0.973767	0.802699	F.Normal
ERS3644617	229	274	6.16076	0.970815	0.785891	F.Normal
ERS3644619	137	151.615	5.01914	0.932425	0.707118	M.Normal
ERS3644620	157	180.25	5.27088	0.942647	0.72257	F.Normal
ERS3644622	108	136.875	4.74065	0.921937	0.70181	F.Normal
ERS3644625	201	223.5	5.90016	0.961769	0.771157	F.Normal
ERS3644626	194	257.577	5.36364	0.935651	0.70575	F.Normal
ERS3644627	320	381.923	7.05678	0.984111	0.847975	M.Normal
ERS3644628	184	206.143	6.08606	0.973009	0.808933	F.Normal
ERS3644629	207	237.516	5.62705	0.955754	0.731404	M.Normal
ERS3644631	224	251.364	6.10242	0.968133	0.781624	F.Normal
ERS3644632	241	285.333	5.68945	0.934894	0.71901	M.Normal
ERS3644633	257	295.592	6.14465	0.965583	0.767541	M.Normal
ERS3644634	128	144.235	4.77794	0.910023	0.682564	F.Normal
ERS3644636	219	259.552	5.78705	0.962052	0.744336	F.Normal
ERS3644637	220	252.81	6.36868	0.980841	0.818454	F.Normal
ERS3644639	122	132	4.92526	0.939626	0.71064	F.Normal
ERS3644640	125	132.286	5.08784	0.939919	0.730404	F.Normal
ERS3644642	175	185.684	5.58725	0.960703	0.749844	F.Normal
ERS3644643	168	229.25	4.99641	0.912421	0.675892	F.Normal
ERS3644644	192	243.75	5.87216	0.967525	0.774184	F.Normal
ERS3644645	213	264.476	5.76881	0.942423	0.745835	F.Normal
ERS3644646	126	139.588	4.93576	0.925529	0.707405	F.Normal
ERS3644648	169	195.64	5.70518	0.96638	0.770878	M.Normal
ERS3644649	145	154.13	5.44302	0.955423	0.75809	F.Normal
ERS3644650	225	269.452	6.2347	0.973307	0.797911	F.Normal
ERS3644651	194	215.525	5.79207	0.964232	0.762123	F.Normal
ERS3644652	140	182.273	4.9494	0.92314	0.694235	F.Normal
ERS3644653	158	188.565	5.54242	0.958203	0.758842	F.Normal
ERS3644654	228	279.207	5.91669	0.956507	0.755365	F.Normal
ERS3644655	253	310.303	6.4551	0.975926	0.808607	F.Normal
ERS3644657	138	148	5.06434	0.935117	0.712432	M.Normal
ERS3644658	61	86.5	2.37451	0.664232	0.400374	M.Normal
ERS3644659	247	287.526	6.41719	0.97657	0.80736	F.Normal
ERS3644660	157	165.724	5.36335	0.948208	0.735248	M.Normal
ERS3644661	102	111.429	5.13584	0.950253	0.76971	F.Normal
ERS3644666	128	138.059	5.30926	0.956539	0.758466	F.Normal
ERS3644668	154	177.4	5.54106	0.960255	0.762519	F.Normal
ERS3644669	80	82.1538	4.58397	0.91788	0.725091	M.Normal
ERS3644671	135	141.577	4.99935	0.933746	0.70644	F.Normal
ERS3644672	130	155.667	5.44004	0.958675	0.774673	F.Normal
ERS3644673	108	113.571	4.73962	0.918865	0.701658	F.Normal
ERS3644674	203	218.03	5.61973	0.954872	0.733135	F.Normal
ERS3644676	212	235.333	6.45757	0.979913	0.835616	F.Normal
ERS3644677	94	96.5	5.43296	0.963387	0.828879	F.Normal
ERS3644679	160	170	5.89639	0.971713	0.805305	F.Normal
ERS3644680	140	169.545	5.33697	0.949828	0.748599	F.Normal
ERS3644683	143	166	5.57864	0.961601	0.779153	F.Normal
ERS3644685	196	204.25	6.00371	0.959431	0.788436	F.Normal
ERS3644686	136	146.2	5.15814	0.925662	0.727783	F.Normal
ERS3644687	197	213.034	6.02825	0.969474	0.790896	M.Normal
ERS3644688	66	66	4.95873	0.947726	0.820385	M.Normal
ERS3644689	207	219.429	6.28376	0.975267	0.816763	F.Normal
ERS3644690	226	250.7	6.16339	0.970998	0.788139	F.Normal
ERS3644691	192	218	5.90331	0.968397	0.778291	M.Normal
ERS3644692	231	270.75	6.25195	0.975095	0.796249	F.Normal
ERS3644693	138	146.636	5.48515	0.960035	0.77163	F.Normal
ERS3644694	187	202.5	5.82098	0.951541	0.771308	M.Normal
ERS3644696	211	272.034	5.80156	0.962165	0.751391	F.Normal
ERS3644697	161	176.955	5.81622	0.969771	0.793383	F.Normal
ERS3644698	204	224.812	6.10612	0.970806	0.795853	M.Normal
ERS3644700	198	212.5	6.1966	0.974799	0.812204	M.Normal
ERS3644702	175	199.391	5.43149	0.952007	0.728941	F.Normal
ERS3644703	177	197.778	5.17503	0.916028	0.692997	F.Normal
ERS3644704	265	304.75	6.75726	0.983639	0.839427	M.Normal
ERS3644705	188	206.474	6.15709	0.97578	0.815014	F.Normal
ERS3644706	88	94.4286	4.6542	0.929436	0.720529	F.Normal
ERS3644707	134	148.438	5.37545	0.952357	0.76074	F.Normal
ERS3644708	222	277.435	6.35893	0.977554	0.815831	F.Normal
ERS3644709	149	163.438	5.77272	0.967665	0.799637	F.Normal
ERS3644712	139	153.056	5.60772	0.965718	0.787718	M.Normal
ERS3644713	215	242.824	5.63743	0.94491	0.72758	F.Normal
ERS3644717	114	118.583	5.42044	0.960828	0.793287	F.Normal
ERS3644718	168	190.895	5.9199	0.972134	0.800818	F.Normal
ERS3644719	211	233.037	5.90196	0.956191	0.764394	F.Normal
ERS3644720	153	160.125	5.27215	0.943089	0.726453	F.Normal
ERS3644721	135	145.688	5.39779	0.955189	0.762743	F.Normal
ERS3644722	135	148.571	5.49684	0.960565	0.77674	M.Normal
ERS3644723	192	218.105	6.19624	0.973357	0.816911	F.Normal
ERS3644727	144	155.04	5.18225	0.944902	0.722775	F.Normal
ERS3644728	192	218.906	5.88011	0.967962	0.775232	M.Normal
ERS3644729	179	220.13	5.80696	0.964469	0.775935	F.Normal
ERS3644730	167	178.5	5.78625	0.962019	0.783651	F.Normal
ERS3644731	203	222.833	6.41763	0.980851	0.837228	F.Normal
ERS3644736	138	152.615	5.3905	0.951904	0.758314	M.Normal
ERS3644737	161	175.773	5.63616	0.954618	0.768821	F.Normal
ERS3644738	208	223	6.41333	0.977343	0.832853	F.Normal
ERS3644739	186	210.792	6.05244	0.974956	0.8028	F.Normal
ERS3644740	254	288.895	6.29352	0.96734	0.787804	F.Normal
ERS3644742	143	164.75	5.61814	0.966378	0.784671	F.Normal
ERS3644743	173	197.167	5.75807	0.960411	0.774493	M.Normal
ERS3644744	244	301.037	6.56554	0.980922	0.82786	F.Normal
ERS3644745	179	185.955	6.30006	0.978601	0.841825	F.Normal
ERS3644746	128	130.118	5.588	0.963263	0.798286	F.Normal
ERS3644749	137	157	4.98166	0.915285	0.701837	M.Normal
ERS3644751	138	159	5.27332	0.943583	0.74183	F.Normal
ERS3644753	191	252.222	5.45002	0.947466	0.719245	M.Normal
ERS3644754	197	231.871	5.51079	0.942432	0.723006	F.Normal
ERS3644755	247	290.5	6.13145	0.963217	0.77141	F.Normal
ERS3644757	190	231.353	6.11266	0.970925	0.8075	M.Normal
ERS3644758	271	312.732	6.67568	0.981412	0.825978	F.Normal
ERS3644759	140	160.778	4.98578	0.941204	0.699338	M.Normal
ERS3644760	264	318.737	6.42049	0.975357	0.798132	M.Normal
ERS3644761	206	235.69	6.03057	0.967534	0.784566	F.Normal
ERS3644762	121	138.25	4.98851	0.945085	0.721002	M.Normal
ERS3644763	187	229	6.02358	0.97449	0.798153	F.Normal
ERS3644764	192	218.64	5.84957	0.964517	0.771206	F.Normal
ERS3644765	231	277.667	6.32385	0.976186	0.805406	F.Normal
ERS3644766	268	326.4	6.23534	0.967248	0.773031	F.Normal
ERS3644767	200	232.692	5.44983	0.95172	0.712969	F.Normal
ERS3644768	220	291.87	6.23874	0.973921	0.801754	M.Normal
ERS3644769	187	223.964	5.25453	0.929004	0.696251	F.Normal
ERS3644770	223	262	5.88821	0.954269	0.754812	F.Normal
ERS3644771	186	220.44	5.48828	0.948842	0.727969	F.Normal
ERS3644772	242	287.933	5.96145	0.956646	0.752816	F.Normal
ERS3644773	136	143.5	5.13258	0.921632	0.724178	F.Normal
ERS3644774	141	157.111	4.88236	0.93182	0.683847	F.Normal
ERS3644775	181	210.286	4.48106	0.827731	0.597487	F.Normal
ERS3644776	132	148.235	4.98345	0.927071	0.707434	F.Normal
ERS3644777	192	227.875	5.9309	0.967632	0.781929	F.Normal
ERS3644778	163	187.8	5.66018	0.959457	0.770226	F.Normal
ERS3644779	192	207.529	5.85479	0.960214	0.771894	F.Normal
ERS3644781	190	229	5.98052	0.968175	0.790045	M.Normal
ERS3644782	147	163.235	5.39349	0.945747	0.74913	F.Normal
ERS3644784	138	160.143	4.69457	0.921534	0.660414	F.Normal
ERS3644785	179	196.103	5.62196	0.94503	0.751216	F.Normal
ERS3644786	171	206.286	5.70089	0.961606	0.768536	F.Normal
ERS3644787	228	281.103	6.41565	0.979216	0.819066	F.Normal
ERS3644788	104	131.083	3.74981	0.815702	0.559637	F.Normal
ERS3644789	146	185.545	5.00847	0.919567	0.696605	F.Normal
ERS3644790	146	162.435	5.22893	0.944487	0.727268	F.Normal
ERS3644791	261	290.167	6.41758	0.970777	0.799409	F.Normal
ERS3644792	147	156.625	5.37908	0.94872	0.747128	F.Normal
ERS3644793	346	418.85	6.8823	0.980445	0.815958	F.Normal
ERS3644794	232	267.25	6.21708	0.971029	0.79118	F.Normal
ERS3644795	211	243.8	5.96384	0.969426	0.772409	M.Normal
ERS3644797	184	212.636	5.75773	0.959781	0.765292	F.Normal
ERS3644798	145	164.118	5.54506	0.957601	0.772303	F.Normal
ERS3644799	246	296.324	6.5565	0.982639	0.825494	F.Normal
ERS3644800	141	147.375	5.35046	0.951999	0.749411	F.Normal
ERS3644801	301	346.182	6.86846	0.984887	0.834197	M.Normal
ERS3644802	275	332.778	6.74875	0.983511	0.832841	F.Normal
ERS3644803	171	214	5.63755	0.962521	0.759998	F.Normal
ERS3644804	310	364.185	6.79264	0.981098	0.820751	F.Normal
ERS3644806	140	178.154	5.25841	0.948791	0.737578	F.Normal
ERS3644807	236	262.906	6.37065	0.969263	0.808187	F.Normal
ERS3644808	183	250.105	5.44918	0.953037	0.72504	F.Normal
ERS3644809	251	304.625	6.20973	0.96654	0.778987	M.Normal
ERS3644810	161	198	5.74063	0.967068	0.783071	F.Normal
ERS3644811	216	267.207	6.01865	0.966743	0.776111	F.Normal
ERS3644812	129	154	5.10882	0.950348	0.728662	F.Normal
ERS3644814	183	212.333	5.9864	0.97005	0.796519	F.Normal
ERS3644815	137	166.062	5.15412	0.938013	0.726133	F.Normal
ERS3644816	187	215.219	5.64088	0.962243	0.747444	F.Normal
ERS3644817	110	122.833	3.65458	0.725551	0.538916	F.Normal
ERS3644818	168	190.143	5.64956	0.961513	0.764247	F.Normal
ERS3644819	288	328.679	6.70284	0.983209	0.820428	F.Normal
ERS3644821	131	139.5	5.34258	0.946251	0.759599	M.Normal
ERS3644822	188	219.2	5.83979	0.955522	0.773013	F.Normal
ERS3644823	109	123.25	5.05257	0.939909	0.746518	F.Normal
ERS3644824	156	174.857	5.29737	0.937098	0.727121	M.Normal
ERS3644825	182	249.562	5.6905	0.96412	0.757946	F.Normal
ERS3644826	195	234.261	5.80422	0.960719	0.762978	F.Normal
ERS3644827	197	238	6.19375	0.975531	0.81261	M.Normal
ERS3644828	213	249.033	6.25165	0.977362	0.808259	F.Normal
ERS3644829	208	229.484	6.3121	0.976435	0.819707	M.Normal
ERS3644830	238	270.344	6.5327	0.979332	0.827467	F.Normal
ERS3644831	122	138.235	4.62817	0.878636	0.667775	F.Normal
ERS3644832	118	118.375	5.17062	0.938297	0.751255	F.Normal
ERS3644833	112	122.556	4.34851	0.858498	0.638797	M.Normal
ERS3644834	246	281.417	6.32097	0.974524	0.79584	M.Normal
ERS3644835	66	72	3.85253	0.882547	0.637372	M.Normal
ERS3644836	232	282.091	6.16103	0.972995	0.784047	F.Normal
ERS3644837	238	264.906	5.93498	0.939904	0.751756	F.Normal
ERS3644839	160	181.25	4.86974	0.881332	0.66509	F.Normal
ERS3644840	246	284.278	6.58553	0.981256	0.829149	F.Normal
ERS3644841	291	331.526	6.78472	0.979573	0.828934	F.Normal
ERS3644842	165	198.3	5.84058	0.966014	0.792877	F.Normal
ERS3644843	298	383.312	6.62568	0.981139	0.806126	F.Normal
ERS3644844	190	213.429	5.97294	0.970519	0.789043	F.Normal
ERS3644845	213	239.464	6.27544	0.97365	0.811335	F.Normal
ERS3644846	247	304.441	6.06877	0.962011	0.763524	M.Normal
ERS3644847	177	198.368	5.82204	0.964781	0.779639	M.Normal
ERS3644848	304	411.763	6.8457	0.985117	0.829991	M.Normal
ERS3644849	179	208.64	5.61126	0.9581	0.749786	F.Normal
ERS3644850	164	172.885	5.48903	0.956259	0.74604	F.Normal
ERS3644851	281	330.522	6.61721	0.979145	0.813482	F.Normal
ERS3644852	218	242.6	6.25079	0.969906	0.804665	F.Normal
ERS3644854	208	250.088	5.83002	0.963805	0.757102	F.Normal
ERS3644855	210	223.533	6.24759	0.974159	0.809877	F.Normal
ERS3644856	189	225.12	5.80675	0.963658	0.767861	M.Normal
ERS3644857	208	242.5	5.96357	0.965881	0.774446	F.Normal
ERS3644859	153	171	5.38415	0.949098	0.741886	F.Normal
ERS3644860	194	225.333	5.08817	0.922998	0.669503	F.Normal
ERS3644861	208	251.24	6.09241	0.969233	0.791176	M.Normal
ERS3644862	171	179.556	5.88106	0.964005	0.792825	M.Normal
ERS3644863	276	303.025	6.76628	0.976869	0.834465	F.Normal
ERS3644864	187	199	6.23706	0.977197	0.826441	F.Normal
ERS3644865	182	208.4	5.80692	0.963906	0.773452	F.Normal
ERS3644866	124	143	5.53325	0.960504	0.795671	M.Normal
ERS3644869	263	297.22	6.11285	0.953992	0.760407	M.Normal
ERS3644870	219	259.286	6.27076	0.973059	0.806551	F.Normal
ERS3644871	124	133	5.4358	0.960583	0.781658	F.Normal
ERS3644872	163	192.176	5.53952	0.951105	0.753807	M.Normal
ERS3644873	215	241.757	6.03749	0.963704	0.779212	M.Normal
ERS3644876	222	258.387	6.32549	0.975827	0.811542	F.Normal
ERS3644882	261	301.886	6.40611	0.972647	0.797981	F.Normal
ERS3644884	336	394.892	6.59505	0.966234	0.785844	M.Normal
ERS3644885	163	180.182	5.73914	0.963893	0.780971	M.Normal
ERS3644886	204	218.5	6.30451	0.976475	0.82171	F.Normal
ERS3644888	211	314.542	5.95952	0.966321	0.771848	F.Normal
ERS3644889	264	343.167	6.21994	0.960762	0.773201	M.Normal
ERS3644891	201	240.516	5.62042	0.948084	0.734594	F.Normal
ERS3644893	210	228.529	6.16143	0.973664	0.798708	F.Normal
ERS3644894	172	198.4	5.93035	0.967189	0.798564	F.Normal
ERS3644895	212	218.652	6.40587	0.975905	0.828925	F.Normal
ERS3644897	161	208.526	4.43283	0.883439	0.604676	F.Normal
ERS3644899	110	114.588	5.47665	0.966674	0.807603	F.Normal
ERS3644901	187	254.562	5.73002	0.961235	0.759256	F.Normal
ERS3644902	167	187.217	5.38976	0.936159	0.729953	F.Normal
ERS3644904	219	244.161	5.96088	0.96253	0.766693	F.Normal
ERS3644911	191	222.2	6.07685	0.97559	0.801967	F.Normal
ERS3644917	291	330.529	6.58953	0.975592	0.805086	F.Normal
ERS3644918	235	254.5	6.47865	0.972389	0.822527	M.Normal
ERS3644919	147	158	5.2915	0.945862	0.734964	M.Normal
ERS3644920	189	212.375	5.95046	0.969718	0.786865	F.Normal
ERS3644921	163	174.111	5.3934	0.939397	0.733923	F.Normal
ERS3644923	232	250.097	6.68346	0.984119	0.850532	F.Normal
ERS3644924	182	206.667	5.82019	0.965435	0.77522	F.Normal
ERS3644925	224	259.357	6.20455	0.973831	0.794706	M.Normal
ERS3644926	66	69.6	3.93883	0.8754	0.65165	F.Normal
ERS3644927	110	121.667	4.96604	0.941686	0.732308	F.Normal
ERS3644928	181	194.034	6.01722	0.966785	0.802313	M.Normal
ERS3644930	106	122.154	4.74865	0.933966	0.705813	F.Normal
ERS3644931	157	177.714	5.44613	0.947888	0.746595	F.Normal
ERS3644932	222	253.098	5.77493	0.951093	0.740906	F.Normal
ERS3644933	245	281.029	6.56503	0.980752	0.82718	F.Normal
ERS3644934	138	151.571	5.3926	0.949633	0.75861	F.Normal
ERS3644935	180	208.889	5.00068	0.908653	0.667483	F.Normal
ERS3644937	210	251.325	5.43393	0.939357	0.704402	F.Normal
ERS3644938	135	146.4	5.67328	0.965784	0.801671	F.Normal
ERS3644939	184	199	5.65613	0.9611	0.751788	M.Normal
ERS3644940	216	248.667	6.13799	0.970837	0.791499	F.Normal
ERS3644941	188	209.5	5.1116	0.924378	0.676622	F.Normal
ERS3644943	273	325.977	6.65371	0.982013	0.822181	F.Normal
ERS3644944	171	180.677	5.75133	0.963419	0.775336	M.Normal
ERS3644946	206	221.366	5.80079	0.965966	0.754673	F.Normal
ERS3644947	186	211.615	5.64442	0.947734	0.74868	F.Normal
ERS3644948	146	156.688	5.82149	0.969143	0.809684	F.Normal
ERS3644949	204	229.161	5.93352	0.966885	0.773357	F.Normal
ERS3644950	226	263.886	6.04648	0.965902	0.773189	F.Normal
ERS3644951	191	236.15	5.71565	0.950208	0.754299	F.Normal
ERS3644953	213	249.029	6.33404	0.979099	0.818911	F.Normal
ERS3644954	142	156.056	5.51845	0.959528	0.771839	F.Normal
ERS3644958	209	250	5.97277	0.95973	0.774944	F.Normal
ERS3644960	71	76.625	4.07753	0.85515	0.66304	F.Normal
ERS3644961	190	228.077	5.79201	0.963617	0.765142	F.Normal
ERS3644962	230	260.947	6.19792	0.970592	0.789998	F.Normal
ERS3644963	217	278.107	5.78585	0.951146	0.74545	F.Normal
ERS3644964	302	384.078	6.51188	0.975056	0.79043	F.Normal
ERS3644965	112	124.353	4.99047	0.944529	0.733099	F.Normal
ERS3644966	252	315.553	6.34736	0.976423	0.795679	M.Normal
ERS3644968	158	174.731	5.40841	0.953145	0.740495	F.Normal
ERS3644969	208	244.833	5.51273	0.931747	0.715899	F.Normal
ERS3644970	275	344.158	6.57118	0.978012	0.810927	F.Normal
ERS3644971	180	200.217	5.79742	0.965118	0.77383	F.Normal
ERS3644972	278	328.732	6.77135	0.98392	0.834019	M.Normal
ERS3644973	78	81.6667	4.09427	0.893084	0.651393	F.Normal
ERS3644974	165	185.778	5.57737	0.961374	0.757144	F.Normal
ERS3644975	235	289.886	5.68254	0.955564	0.721454	M.Normal
ERS3644979	174	182.903	5.57265	0.945817	0.748716	F.Normal
ERS3644980	163	174.5	6.15748	0.977698	0.837898	F.Normal
ERS3644982	182	197	5.43872	0.923567	0.72441	M.Normal
ERS3644984	173	182.37	5.86628	0.956636	0.789049	F.Normal
ERS3644985	217	245.683	5.82687	0.956768	0.750735	F.Normal
ERS3644986	156	179.375	5.57237	0.963443	0.764868	F.Normal
ERS3644987	158	164.786	5.85818	0.96836	0.802075	F.Normal
ERS3644989	218	248.565	6.20079	0.970277	0.798229	F.Normal
ERS3644990	208	235.774	5.76942	0.941845	0.749233	F.Normal
ERS3644991	277	329	6.66561	0.978029	0.821521	F.Normal
ERS3644992	108	114.5	5.25873	0.952621	0.778508	F.Normal
ERS3644993	211	251.037	6.14766	0.971343	0.796216	F.Normal
ERS3644995	171	196.588	5.79714	0.960862	0.781512	F.Normal
ERS3644996	237	277.738	5.83464	0.9632	0.739616	F.Normal
ERS3644997	274	325.773	6.5403	0.979218	0.807641	F.Normal
ERS3644998	150	170.3	5.17945	0.942866	0.7165	F.Normal
ERS3644999	236	307.029	6.0701	0.969489	0.77006	F.Normal
ERS3645000	147	170.077	5.46057	0.957463	0.758447	F.Normal
ERS3645001	242	278.273	5.69901	0.940739	0.719675	F.Normal
ERS3645003	176	196.308	5.81323	0.962638	0.779313	F.Normal
ERS3645004	178	209.889	5.75014	0.966806	0.769174	F.Normal
ERS3645005	191	211.583	5.16396	0.914059	0.681493	F.Normal
ERS3645006	152	164.833	5.63699	0.962825	0.777739	F.Normal
ERS3645007	151	174.8	5.06963	0.934991	0.700379	F.Normal
ERS3645008	222	275.469	6.05458	0.970919	0.776784	F.Normal
ERS3645009	157	172.615	5.45816	0.949647	0.748245	F.Normal
ERS3645010	205	243.333	6.06296	0.966599	0.789502	F.Normal
ERS3645011	271	326.8	6.61306	0.97756	0.81823	F.Normal
ERS3645012	159	183.8	5.1128	0.932529	0.69915	F.Normal
ERS3645013	200	208.775	6.05636	0.967425	0.792317	F.Normal
ERS3645014	236	272.833	6.17484	0.971836	0.783346	F.Normal
ERS3645015	224	281.791	5.63239	0.962009	0.721421	F.Normal
ERS3645016	138	149.538	5.03052	0.938249	0.707674	F.Normal
ERS3645017	201	263.667	5.95279	0.966067	0.778036	F.Normal
ERS3645018	222	272.324	6.10679	0.973403	0.783483	M.Normal
ERS3645019	101	110.231	4.87976	0.94561	0.732893	M.Normal
ERS3645020	257	285.213	6.33361	0.97097	0.791145	M.Normal
ERS3645022	59	84.5	2.88321	0.747984	0.490122	F.Normal
ERS3645023	298	353.862	6.43078	0.97302	0.782413	F.Normal
ERS3645024	159	176.652	5.6477	0.962668	0.772294	F.Normal
ERS3645025	216	243.237	5.64735	0.955277	0.728231	F.Normal
ERS3645026	168	186.474	5.72552	0.960641	0.774523	F.Normal
ERS3645027	216	226.542	6.57172	0.98016	0.84743	F.Normal
ERS3645028	124	147.077	4.43434	0.868755	0.637649	F.Normal
ERS3645029	214	263.5	5.77881	0.964594	0.746474	F.Normal
ERS3645030	215	237.455	6.26165	0.97169	0.808143	M.Normal
ERS3645031	319	398.596	6.85521	0.983445	0.8242	F.Normal
ERS3645032	173	188.03	4.99239	0.915604	0.671504	M.Normal
ERS3645033	134	153.5	5.33533	0.956097	0.755061	F.Normal
ERS3645034	247	271.405	6.75681	0.983496	0.850088	F.Normal
ERS3645035	180	191.111	5.23574	0.891111	0.698858	F.Normal
ERS3645036	216	236.023	6.03408	0.971807	0.778101	M.Normal
ERS3645037	101	120.462	4.35701	0.891847	0.654381	M.Normal
ERS3645038	210	242.229	5.83947	0.96056	0.756972	F.Normal
ERS3645039	221	251.441	6.26048	0.974125	0.803872	F.Normal
ERS3645040	207	248	6.05945	0.969801	0.787607	F.Normal
ERS3645041	202	249.115	5.71374	0.963253	0.746094	F.Normal
ERS3645042	198	213.5	6.04993	0.968957	0.79298	F.Normal
ERS3645043	214	230.034	6.49649	0.979406	0.839181	F.Normal
ERS3645044	242	293.333	5.78276	0.932726	0.730251	F.Normal
ERS3645046	109	119.909	4.73169	0.922933	0.699107	M.Normal
ERS3645047	234	269.25	6.11688	0.970182	0.777204	F.Normal
ERS3645048	262	296.071	6.57292	0.979076	0.818197	M.Normal
ERS3645049	153	167.286	5.7384	0.966749	0.790698	M.Normal
ERS3645050	165	188.1	5.99321	0.966279	0.813596	F.Normal
ERS3645051	175	192.25	6.16639	0.975651	0.827569	F.Normal
ERS3645052	166	184.125	4.98367	0.889604	0.675749	M.Normal
ERS3645053	101	111	4.19708	0.881127	0.630362	M.Normal
ERS3645054	120	130.5	5.29543	0.95573	0.766688	M.Normal
ERS3645055	311	370.304	6.87915	0.984356	0.830738	M.Normal
ERS3645056	156	186.37	5.11565	0.935167	0.702178	F.Normal
ERS3645057	267	303.6	6.62059	0.981425	0.821342	F.Normal
ERS3645058	119	137.4	5.14192	0.953716	0.745766	F.Normal
ERS3645059	116	123.556	5.11328	0.942523	0.745596	F.Normal
ERS3645060	111	113.812	5.11392	0.940346	0.752666	M.Normal
ERS3645063	189	230.4	5.63518	0.951662	0.745173	F.Normal
ERS3645064	224	260.833	5.90545	0.961642	0.756396	M.Normal
ERS3645065	158	177.688	5.33467	0.95442	0.730399	F.Normal
ERS3645066	280	331.818	6.42187	0.975647	0.789968	F.Normal
ERS3645067	196	226.37	5.77788	0.951205	0.758778	F.Normal
ERS3645068	271	334	6.70021	0.980282	0.829013	M.Normal
ERS3645069	118	125.158	5.18456	0.947167	0.753281	F.Normal
ERS3645070	292	334.449	6.6543	0.977821	0.812509	F.Normal
ERS3645071	131	142.053	4.98595	0.929735	0.708893	M.Normal
ERS3645072	173	192.194	5.30927	0.942265	0.714128	F.Normal
ERS3645073	218	246	5.83397	0.96341	0.751008	F.Normal
ERS3645074	157	171.5	5.46262	0.956897	0.748855	F.Normal
ERS3645075	240	276.029	6.64177	0.983599	0.839997	F.Normal
ERS3645076	245	286.732	6.09877	0.963244	0.768432	M.Normal
ERS3645077	235	264.292	6.64619	0.982249	0.843798	F.Normal
ERS3645078	142	148.8	5.62762	0.965239	0.787108	F.Normal
ERS3645079	107	117.2	3.9349	0.797341	0.583686	F.Normal
ERS3645080	223	266.966	5.88885	0.94385	0.754894	F.Normal
ERS3645081	226	242.078	6.28934	0.976811	0.804245	F.Normal
ERS3645082	179	195.435	6.06821	0.970426	0.810845	M.Normal
ERS3645083	165	188.156	5.27963	0.946422	0.716726	F.Normal
ERS3645084	140	151.667	5.5082	0.953524	0.772616	F.Normal
ERS3645085	170	175.714	6.15836	0.975445	0.831155	F.Normal
ERS3645086	157	177.217	5.35567	0.952256	0.734194	F.Normal
ERS3645087	177	212.053	5.55265	0.944186	0.743565	F.Normal
ERS3645088	128	139.667	5.18928	0.951832	0.741326	F.Normal
ERS3645089	139	163.474	5.02756	0.923068	0.706223	F.Normal
ERS3645090	153	163	5.49633	0.945833	0.757343	F.Normal
ERS3645091	190	231.045	5.74979	0.958859	0.759564	F.Normal
ERS3645092	195	210.333	6.43043	0.980374	0.845293	M.Normal
ERS3645093	233	267.45	6.42631	0.978533	0.817162	F.Normal
ERS3645094	185	196.757	5.30327	0.923006	0.704156	F.Normal
ERS3645095	307	371.31	6.74486	0.980145	0.816362	F.Normal
ERS3645096	204	234.441	6.06578	0.972246	0.790595	F.Normal
ERS3645097	142	169.067	5.05625	0.938727	0.707193	M.Normal
ERS3645098	150	178.957	5.53914	0.961827	0.766258	F.Normal
ERS3645099	153	175.895	5.41906	0.953859	0.746695	F.Normal
ERS3645100	160	191	5.62321	0.963739	0.767996	M.Normal
ERS3645101	206	233.5	6.01205	0.971713	0.782157	M.Normal
ERS3645102	331	368.839	7.04662	0.983379	0.841821	M.Normal
ERS3645103	180	194.531	5.44474	0.946786	0.726755	F.Normal
ERS3645104	298	358.857	7.04258	0.987389	0.856849	M.Normal
ERS3645105	160	170.969	5.46371	0.945975	0.746212	F.Normal
ERS3645106	131	137.562	5.5145	0.959788	0.784041	F.Normal
ERS3645108	175	228.812	5.73729	0.964364	0.769981	M.Normal
ERS3645109	244	283.516	6.70672	0.984429	0.845662	F.Normal
ERS3645110	310	358.725	6.79944	0.981253	0.821573	M.Normal
ERS3645111	77	78.9091	3.8564	0.878729	0.615371	F.Normal
ERS3645113	153	176.619	5.40712	0.949711	0.745051	F.Normal
ERS3645114	228	262.028	6.09734	0.970194	0.778428	F.Normal
ERS3645115	174	203.129	5.33646	0.942587	0.716982	F.Normal
ERS3645116	205	248.062	5.57086	0.947474	0.725421	M.Normal
ERS3645117	119	127.5	4.89876	0.924708	0.710499	F.Normal
ERS3645118	208	271.214	6.04865	0.969825	0.785494	F.Normal
ERS3645119	153	179.105	5.62445	0.963588	0.774996	M.Normal
ERS3645120	254	301.634	6.25411	0.969626	0.782871	F.Normal
ERS3645121	158	176.913	5.38164	0.947191	0.73683	F.Normal
ERS3645122	183	213.75	5.80341	0.967138	0.772172	M.Normal
ERS3645123	182	203.577	5.36497	0.933394	0.714587	F.Normal
ERS3645124	204	233.64	5.78266	0.947912	0.753694	M.Normal
ERS3645125	267	304.66	6.31602	0.970765	0.783558	M.Normal
ERS3645126	188	227.2	5.59929	0.959698	0.741177	F.Normal
ERS3645127	182	207.161	5.47993	0.9409	0.729899	F.Normal
ERS3645128	118	121.9	5.03574	0.944924	0.731658	F.Normal
ERS3645129	105	111.5	4.96368	0.94182	0.739277	F.Normal
ERS3645130	106	118.214	4.68884	0.92877	0.696922	F.Normal
ERS3645131	228	267.6	6.45002	0.979201	0.823453	F.Normal
ERS3645133	155	178.882	5.53405	0.957704	0.760577	F.Normal
ERS3645134	115	124.562	5.05925	0.948091	0.739064	M.Normal
ERS3645135	186	207.577	5.61442	0.94853	0.744702	F.Normal
ERS3645136	187	212.552	5.44579	0.949588	0.721593	M.Normal
ERS3645137	149	191	5.22149	0.947873	0.723281	F.Normal
ERS3645138	151	169.9	5.31169	0.948192	0.733821	F.Normal
ERS3645139	219	233.385	6.30318	0.975377	0.810721	M.Normal
ERS3645140	219	239.086	6.27612	0.972324	0.80724	M.Normal
ERS3645141	269	330.568	6.34911	0.975255	0.786612	F.Normal
ERS3645142	185	226.577	5.8212	0.96721	0.772925	F.Normal
ERS3645143	100	107.059	4.10735	0.857766	0.618218	F.Normal
ERS3645144	150	165.037	5.41845	0.957665	0.749563	F.Normal
ERS3645145	160	188.636	5.52095	0.960757	0.75403	F.Normal
ERS3645146	181	216.286	5.52335	0.952687	0.736462	M.Normal
ERS3645147	304	354.25	7.01918	0.986095	0.851024	M.Normal
ERS3645148	93	102.1	4.65968	0.924075	0.71258	M.Normal
ERS3645150	102	108.316	5.13286	0.956804	0.769265	M.Normal
ERS3645151	72	75.5	3.67488	0.805174	0.595612	M.Normal
ERS3645152	126	142.25	4.75515	0.915306	0.68152	M.Normal
ERS3645153	200	225.615	6.26835	0.977702	0.820051	F.Normal
ERS3645154	275	342.029	6.62889	0.9815	0.818049	F.Normal
ERS3645156	124	142.9	5.0098	0.945284	0.7204	M.Normal
ERS3645157	238	289.484	5.91667	0.957346	0.749437	F.Normal
ERS3645158	192	212.323	5.45061	0.933089	0.718608	F.Normal
ERS3645159	167	210.043	5.26261	0.945433	0.712734	F.Normal
ERS3645160	172	191.84	5.74547	0.96618	0.773669	M.Normal
ERS3645163	265	311.5	6.57771	0.979244	0.817122	M.Normal
ERS3645164	192	215.333	6.15441	0.972818	0.811397	F.Normal
ERS3645165	180	202.545	5.6186	0.959354	0.749961	F.Normal
ERS3645166	123	139.235	4.63872	0.913094	0.668162	F.Normal
ERS3645168	68	79	4.15684	0.896834	0.682853	F.Normal
ERS3645170	110	120.929	4.88775	0.935028	0.720763	M.Normal
ERS3645171	215	278.84	6.03798	0.973312	0.779276	F.Normal
ERS3645172	141	158.652	5.493	0.963588	0.769376	F.Normal
ERS3645173	175	185.043	5.83286	0.965685	0.782807	M.Normal
ERS3645175	155	182.067	5.12674	0.928583	0.704598	F.Normal
ERS3645176	127	145.4	5.05705	0.938222	0.723606	F.Normal
ERS3645177	224	244	6.34098	0.976305	0.81218	F.Normal
ERS3645178	275	312.5	7.00142	0.987229	0.864022	F.Normal
ERS3645179	112	123.769	4.98436	0.936429	0.732203	M.Normal
ERS3645180	158	177.375	5.5996	0.961869	0.766671	F.Normal
ERS3645183	184	214.875	5.3925	0.923983	0.716748	F.Normal
ERS3645185	158	170.65	5.73095	0.958256	0.784655	F.Normal
ERS3645186	137	155	5.49404	0.959454	0.774023	F.Normal
ERS3645187	97	155.5	4.66715	0.932669	0.707153	M.Normal
ERS3645189	250	268.026	6.83078	0.984983	0.857515	F.Normal
ERS3645190	212	240.219	5.98792	0.967893	0.774842	F.Normal
ERS3645191	182	194.5	6.09744	0.972794	0.812148	F.Normal
ERS3645192	206	228.885	6.18064	0.974522	0.80409	F.Normal
ERS3645193	139	172.067	4.56853	0.868326	0.641743	M.Normal
ERS3645194	169	194.87	5.65539	0.964209	0.764151	F.Normal
ERS3645195	216	242.366	5.65379	0.942117	0.729062	M.Normal
ERS3645196	140	161.667	5.45728	0.954713	0.765474	M.Normal
ERS3645197	138	148.688	5.48883	0.959979	0.772148	F.Normal
ERS3645199	127	131.55	5.08065	0.937226	0.726983	F.Normal
ERS3645200	132	157.2	5.47496	0.962627	0.777208	M.Normal
ERS3645201	158	176.913	4.92022	0.895675	0.673654	F.Normal
ERS3645203	232	275.75	6.42988	0.977681	0.818261	M.Normal
ERS3645204	153	190.714	4.62529	0.846906	0.637321	F.Normal
ERS3645205	149	170.75	5.42789	0.949274	0.751871	F.Normal
ERS3645206	162	188.105	5.28297	0.939767	0.719765	M.Normal
ERS3645207	112	122.2	4.64085	0.902575	0.681741	M.Normal
ERS3645208	188	204.435	6.07928	0.970093	0.804713	F.Normal
ERS3645209	218	245.75	6.56856	0.98127	0.845572	F.Normal
ERS3645210	217	244.824	5.45221	0.927993	0.702464	F.Normal
ERS3645211	155	188.056	5.43175	0.952445	0.746517	F.Normal
ERS3645212	125	135.2	5.56094	0.957621	0.798322	M.Normal
ERS3645213	171	202.955	5.57504	0.962207	0.75157	F.Normal
ERS3645215	240	273.781	6.26078	0.966292	0.791813	F.Normal
ERS3645216	231	256.2	6.48462	0.977144	0.825882	M.Normal
ERS3645217	301	350.522	6.80822	0.980139	0.82688	F.Normal
ERS3645218	230	264.45	6.3938	0.980127	0.814965	F.Normal
ERS3645219	157	182.87	5.40406	0.956314	0.740828	F.Normal
ERS3645220	221	239.594	6.5466	0.982177	0.840612	F.Normal
ERS3645221	236	293.033	5.97835	0.961271	0.75842	F.Normal
ERS3645223	209	246.6	5.37837	0.937109	0.697823	M.Normal
ERS3645224	111	130	4.86216	0.936478	0.715612	M.Normal
ERS3645225	134	165.231	4.98428	0.926422	0.705381	F.Normal
ERS3645227	284	333.286	6.59771	0.978302	0.809561	M.Normal
ERS3645228	102	108	4.59421	0.913071	0.688537	M.Normal
ERS3645229	156	171.812	5.61825	0.948581	0.771166	M.Normal
ERS3645230	211	227.533	6.34659	0.975644	0.821981	M.Normal
ERS3645231	155	162.286	5.58696	0.959339	0.767848	F.Normal
ERS3645232	204	228.231	6.15971	0.972232	0.802838	M.Normal
ERS3645233	167	187	6.14158	0.975125	0.831775	F.Normal
ERS3645235	170	212	5.17531	0.931498	0.69848	M.Normal
ERS3645236	164	201.143	5.61337	0.959332	0.76294	F.Normal
ERS3645237	364	414.05	7.30727	0.987774	0.858891	F.Normal
ERS3645238	173	201.5	5.17393	0.932167	0.695923	F.Normal
ERS3645240	87	90.6667	4.08558	0.882859	0.634117	F.Normal
ERS3645241	49	54	3.72592	0.864777	0.663599	F.Normal
ERS3645242	88	107.125	4.61185	0.930953	0.713972	F.Normal
ERS3645243	326	409	6.99938	0.983323	0.838376	F.Normal
ERS3645245	184	212.5	5.57541	0.950905	0.74106	M.Normal
ERS3645246	139	156.647	5.50723	0.960262	0.773603	M.Normal
ERS3645247	187	243.4	5.33378	0.942902	0.706752	M.Normal
ERS3645248	219	266.7	5.98336	0.965407	0.769586	F.Normal
ERS3645249	131	154.882	5.30097	0.952571	0.753683	F.Normal
ERS3645250	151	182	5.74618	0.969488	0.793846	F.Normal
ERS3645251	136	161.375	5.11932	0.947416	0.722307	F.Normal
ERS3645252	201	235.138	5.64186	0.950176	0.737397	F.Normal
ERS3645254	146	167.368	5.45252	0.95535	0.758366	F.Normal
ERS3645255	189	211.885	6.07477	0.974316	0.803303	F.Normal
ERS3645256	96	99.3333	5.22708	0.950629	0.793791	F.Normal
ERS3645257	227	256.64	6.48057	0.978763	0.828024	F.Normal
ERS3645258	154	187	5.30889	0.946027	0.730569	F.Normal
ERS3645259	152	165	5.39253	0.950561	0.74401	M.Normal
ERS3645260	112	121.067	4.00641	0.82593	0.588542	F.Normal
ERS3645261	137	145.55	5.27214	0.950126	0.742761	M.Normal
ERS3645262	91	131.625	4.13772	0.885992	0.635809	F.Normal
ERS3645263	209	222.034	6.49689	0.982204	0.842946	F.Normal
ERS3645264	74	84.5	4.87296	0.943616	0.784764	F.Normal
ERS3645265	290	330.667	6.82212	0.983142	0.834009	F.Normal
ERS3645266	212	245.176	5.9303	0.963863	0.767387	F.Normal
ERS3645267	143	166.214	5.69064	0.966557	0.794796	F.Normal
ERS3645268	188	208.778	5.88875	0.960355	0.779493	M.Normal
ERS3645270	197	215.594	5.77752	0.960944	0.758	F.Normal
ERS3645271	222	271.875	6.19313	0.974164	0.79456	F.Normal
ERS3645272	80	80.6	4.57228	0.909603	0.723242	F.Normal
ERS3645273	221	243.658	6.19683	0.97428	0.795699	F.Normal
ERS3645274	306	365.442	6.9957	0.985768	0.847205	M.Normal
ERS3645275	136	156.312	5.13355	0.945344	0.724315	F.Normal
ERS3645276	203	220.575	5.63076	0.953893	0.734574	F.Normal
ERS3645277	210	246.667	6.0379	0.971463	0.782694	F.Normal
ERS3645278	175	195.647	6.10233	0.974518	0.818972	M.Normal
ERS3645279	219	235.65	6.22558	0.971374	0.80074	F.Normal
ERS3645280	103	114	4.86476	0.935995	0.727549	F.Normal
ERS3645281	138	152.438	4.54766	0.885407	0.639747	M.Normal
ERS3645285	242	290.886	6.45367	0.979117	0.814975	F.Normal
ERS3645288	110	112.333	5.14517	0.945586	0.758722	M.Normal
ERS3645290	260	309.884	6.09464	0.964167	0.759706	F.Normal
ERS3645293	156	171	4.79733	0.896678	0.658485	F.Normal
ERS3645295	300	362.341	6.75733	0.980964	0.821179	F.Normal

## Sheet: Table S3
Supplementary Table S3.The relative abundance of microbiota at the genus level in fecal samples from CRC patients and healthy control group
Taxon	SAMPLE_00313848	SAMPLE_00322035	SAMPLE_00347423	SAMPLE_00349011	SAMPLE_00361833	SAMPLE_00370083	SAMPLE_00379119	SAMPLE_00399610	SAMPLE_00400004	SAMPLE_00409698	SAMPLE_00417340	SAMPLE_00428069	SAMPLE_00430592	SAMPLE_00450834	SAMPLE_00456567	SAMPLE_00467498	SAMPLE_00468931	SAMPLE_00468963	SAMPLE_00471082	SAMPLE_00506507	SAMPLE_10040959	SAMPLE_10074983	SAMPLE_10112195	SAMPLE_10136540	SAMPLE_10249840	SAMPLE_10355257	SAMPLE_10633630	SAMPLE_10735682	SAMPLE_10760448	SAMPLE_10786589	SAMPLE_10850985	SAMPLE_10875814	SAMPLE_10974898	SAMPLE_10996704	SAMPLE_11132008	SAMPLE_11144342	SAMPLE_11294843	SAMPLE_11359740	SAMPLE_16511459	SAMPLE_16647606	SAMPLE_16857845	SAMPLE_16920705	SAMPLE_16959020	SAMPLE_17033387	SAMPLE_17069401	SAMPLE_17190468	SAMPLE_17347257	SAMPLE_17439860	SAMPLE_17491123
d__Bacteria;p__Campilobacterota;c__Campylobacteria;o__Campylobacterales;f__Campylobacteraceae;g__Campylobacter	246	0	0	169	61	26	0	0	0	0	44	0	0	481	110	96	4	0	24	15	0	712	7	453	0	13	0	0	57	49	205	64	0	263	0	0	0	30	19	4	181	33	472	98	46	9	8	0	1574
d__Bacteria;p__Firmicutes;c__Clostridia;o__Oscillospirales;f__Ruminococcaceae;g__Faecalibacterium	0	0	405	1078	90	2480	0	679	3124	144	41	0	0	946	1685	8	2743	0	1860	15	0	4019	599	2933	3618	2040	86	0	574	26	567	227	0	106	0	0	0	14	0	0	1186	617	990	33	865	1454	57	243	0
d__Bacteria;p__Firmicutes;c__Negativicutes;o__Veillonellales-Selenomonadales;f__Veillonellaceae;g__Veillonella	0	0	0	17	0	541	0	0	0	13	28	0	0	25	0	0	0	0	0	146	8	0	0	276	0	0	101	0	0	1238	83	0	0	58	675	293	0	0	333	960	18	0	88	0	103	0	0	0	0
d__Bacteria;p__Proteobacteria;c__Alphaproteobacteria;o__Rhizobiales;f__Beijerinckiaceae;g__Bosea	0	0	0	0	0	0	0	0	0	0	0	0	0	0	0	0	0	0	0	0	0	0	0	0	0	0	0	0	0	0	0	0	0	0	0	0	0	0	0	0	0	0	0	0	0	0	0	0	0
d__Bacteria;p__Firmicutes;c__Clostridia;o__Lachnospirales;f__Lachnospiraceae;g__Lachnospiraceae_UCG-004	0	0	65	46	55	144	0	0	3	0	0	0	0	0	0	0	59	0	0	0	0	4	0	0	90	0	67	0	0	0	36	0	0	0	0	0	0	8	0	0	0	0	0	0	126	47	0	0	0
d__Bacteria;p__Firmicutes;c__Clostridia;o__Lachnospirales;f__Lachnospiraceae;g__Blautia	0	0	528	796	277	2478	0	1599	1251	71	0	0	0	1818	909	13	2246	24	825	0	0	6317	134	1265	1209	4803	716	0	698	37	316	75	0	47	583	4385	0	105	21	9	645	429	657	345	3103	518	42	2198	0
d__Bacteria;p__Bacteroidota;c__Bacteroidia;o__Bacteroidales;f__Tannerellaceae;g__Parabacteroides	42	0	23	5	33	62	0	24	0	0	59	0	90	208	40	0	0	0	0	0	0	122	0	37	0	91	16	0	7	278	0	4	0	23	0	139	0	5	70	0	0	75	14	50	0	227	0	0	0
d__Bacteria;p__Firmicutes;c__Clostridia;o__Lachnospirales;f__Lachnospiraceae;g__Lachnospira	0	0	8	55	0	28	0	129	84	0	0	0	0	4	17	0	40	0	64	9	0	141	0	19	0	35	0	0	11	0	103	0	0	3	0	174	0	0	0	46	26	0	41	0	21	0	0	0	0
d__Bacteria;p__Firmicutes;c__Clostridia;o__Oscillospirales;f__Oscillospiraceae;g__UCG-002	0	0	1994	496	1828	131	0	213	101	0	6	89	0	348	369	0	113	0	90	0	0	438	0	371	0	532	185	0	522	7	0	101	0	263	0	0	0	8	7	34	30	294	418	282	0	103	0	0	244
d__Bacteria;p__Firmicutes;c__Clostridia;o__Oscillospirales;f__[Eubacterium]_coprostanoligenes_group;g__[Eubacterium]_coprostanoligenes_group	0	0	282	288	653	58	0	292	214	0	28	32	0	962	62	11	66	0	91	0	0	1025	0	235	95	291	0	0	128	13	0	13	0	95	0	0	0	95	10	0	50	118	281	50	0	50	14	0	162
d__Bacteria;p__Bacteroidota;c__Bacteroidia;o__Bacteroidales;f__Bacteroidaceae;g__Bacteroides	39	0	489	127	46	223	0	533	90	7	229	73	54	109	306	8	497	26	569	256	0	601	36	77	26	284	364	0	31	3939	310	63	0	93	0	715	13	0	1356	35	23	1006	91	209	331	777	0	528	9
d__Bacteria;p__Firmicutes;c__Clostridia;o__Peptostreptococcales-Tissierellales;f__Peptostreptococcaceae;g__Peptostreptococcus	0	0	942	75	219	0	0	401	0	0	9	1652	0	0	171	152	14	0	31	2844	0	46	87	62	0	93	205	0	99	0	143	1424	0	0	0	0	54	0	0	33	0	0	105	248	24	596	0	0	18
d__Bacteria;p__Firmicutes;c__Clostridia;o__Lachnospirales;f__Lachnospiraceae;__unclassification	0	0	96	136	4	547	0	82	397	0	125	0	558	73	0	0	339	0	91	11	0	282	0	343	13	71	3	0	65	0	123	0	0	20	2	62	0	0	0	0	3	31	194	16	117	383	0	191	2
d__Bacteria;p__Firmicutes;c__Clostridia;o__Peptococcales;f__Peptococcaceae;g__uncultured	0	0	0	0	0	0	0	0	0	0	0	0	0	0	0	0	0	0	0	0	0	0	0	0	0	0	0	0	0	0	0	0	0	0	0	0	0	0	0	0	0	0	0	0	0	0	0	0	0
d__Bacteria;p__Firmicutes;c__Clostridia;o__Oscillospirales;f__Oscillospiraceae;g__UCG-005	0	0	234	127	345	305	0	0	9	0	0	34	0	727	0	0	15	0	0	0	0	172	6	85	9	61	52	0	81	8	0	13	0	31	0	0	0	0	0	0	17	139	442	42	0	116	11	20	0
d__Bacteria;p__Firmicutes;c__Clostridia;o__Clostridiales;f__Clostridiaceae;g__Clostridium_sensu_stricto_1	0	0	0	123	15	0	0	24	46	0	0	0	228	37	88	0	111	29	0	0	12	56	33	255	0	693	34	0	0	0	177	0	9	361	16	0	0	0	0	1493	860	468	409	293	99	0	2758	524	1279
d__Bacteria;p__Firmicutes;c__Negativicutes;o__Veillonellales-Selenomonadales;f__Selenomonadaceae;g__Megamonas	0	0	0	0	0	0	0	0	0	0	0	0	0	0	276	0	2331	0	0	41	0	0	174	0	60	0	0	0	98	0	0	41	0	0	0	0	0	19	0	0	81	0	0	0	0	0	0	75	0
d__Bacteria;p__Bacteroidota;c__Bacteroidia;o__Bacteroidales;f__Muribaculaceae;g__Muribaculaceae	0	0	306	7	33	0	0	58	0	0	0	0	0	43	0	0	76	0	0	0	0	0	0	101	42	91	0	0	0	0	0	5	0	0	0	0	0	14	0	0	0	0	85	0	0	0	50	107	0
d__Bacteria;p__Firmicutes;c__Bacilli;o__Erysipelotrichales;f__Erysipelotrichaceae;__unclassification	0	0	0	0	0	0	0	0	0	0	0	0	0	0	0	0	0	0	0	0	0	0	0	0	0	0	0	0	0	0	0	0	0	0	0	0	0	0	0	0	0	0	0	0	0	0	0	0	0
d__Bacteria;p__Bacteroidota;c__Bacteroidia;o__Bacteroidales;f__Prevotellaceae;g__Prevotella	442	0	849	6462	182	6119	0	243	1462	0	769	149	21	2166	3398	14277	4410	1401	109	6	0	7188	2071	4891	728	1821	0	0	1085	232	1002	781	0	82	496	0	5238	3452	38	669	1396	141	2518	473	191	388	95	0	1264
d__Bacteria;p__Proteobacteria;c__Gammaproteobacteria;o__Pasteurellales;f__Pasteurellaceae;g__Actinobacillus	0	0	0	0	0	0	0	0	0	0	0	0	0	0	0	0	0	0	0	0	0	0	0	0	0	0	0	0	0	0	0	0	0	0	0	0	0	0	0	0	0	0	55	0	0	0	0	0	0
d__Bacteria;p__Proteobacteria;c__Gammaproteobacteria;o__Enterobacterales;f__Enterobacteriaceae;__unclassification	0	49	0	27	75	503	0	0	0	13	0	0	0	29	0	0	11	196	0	12	62	0	264	87	0	0	0	47	0	50	65	0	77	32	319	0	146	0	0	1015	2	0	0	0	46	0	0	47	0
d__Bacteria;p__Firmicutes;c__Clostridia;o__Lachnospirales;f__Lachnospiraceae;g__Lachnospiraceae_UCG-008	0	0	0	15	0	0	0	0	0	0	0	0	0	0	0	0	2	0	0	0	0	0	0	3	0	0	0	0	0	0	0	0	0	0	0	0	0	0	0	0	0	0	0	0	0	0	0	0	0
d__Bacteria;p__Firmicutes;c__Clostridia;o__Christensenellales;f__Christensenellaceae;g__Christensenellaceae_R-7_group	0	0	32	403	107	68	0	71	53	0	0	179	0	103	0	0	61	0	0	0	0	267	5	100	0	80	97	0	17	0	0	21	0	4	0	0	0	6	0	34	5	389	358	133	7	179	0	51	0
d__Bacteria;p__Firmicutes;c__Clostridia;o__Peptococcales;f__Peptococcaceae;g__Peptococcus	0	0	0	109	0	99	0	0	0	0	0	0	0	339	14	44	39	0	10	0	47	20	14	65	0	0	0	0	22	0	95	15	0	0	0	0	0	64	0	0	0	33	70	80	9	0	0	0	348
d__Bacteria;p__Firmicutes;c__Clostridia;o__Oscillospirales;f__Ruminococcaceae;g__uncultured	0	0	34	13	14	16	0	82	0	0	25	0	110	29	0	0	4	0	0	0	0	13	0	16	0	0	0	0	0	0	0	0	0	0	0	0	0	0	0	0	0	51	77	6	0	13	0	0	0
d__Bacteria;p__Proteobacteria;c__Gammaproteobacteria;o__Burkholderiales;f__Sutterellaceae;g__Sutterella	0	0	29	35	3	346	0	177	0	0	0	16	6	65	90	55	102	69	0	28	0	47	37	8	8	0	87	70	0	7	255	48	0	43	0	0	0	0	0	0	14	20	9	28	0	0	0	0	54
d__Bacteria;p__Firmicutes;c__Clostridia;o__Oscillospirales;f__Oscillospiraceae;g__uncultured	2	0	0	69	0	11	0	62	0	0	0	53	0	212	0	0	52	0	8	0	0	126	0	7	12	167	0	0	38	0	0	3	0	46	0	0	0	5	0	2	0	57	0	57	0	53	0	47	150
d__Bacteria;p__Firmicutes;c__Clostridia;o__Lachnospirales;f__Lachnospiraceae;g__[Ruminococcus]_torques_group	0	0	435	58	0	375	0	146	287	60	0	153	0	224	48	0	462	0	66	588	0	889	110	0	268	623	8212	0	135	116	2584	40	0	38	0	0	0	35	71	0	233	226	108	358	129	687	0	18	0
d__Bacteria;p__Firmicutes;c__Clostridia;o__Peptostreptococcales-Tissierellales;f__Peptostreptococcales-Tissierellales;g__Ezakiella	0	0	29	1320	0	185	0	0	0	0	0	38	0	2556	32	288	7	0	36	0	588	9	6	240	0	561	0	0	1798	0	3449	0	0	0	0	0	0	82	0	160	219	151	908	662	950	613	41	0	1786
d__Bacteria;p__Bacteroidota;c__Bacteroidia;o__Bacteroidales;f__Prevotellaceae;g__Alloprevotella	0	0	37	12	0	5394	0	0	0	0	281	0	0	36	0	0	255	0	0	0	0	409	81	534	0	60	99	0	51	0	14	0	0	0	0	0	0	0	0	0	682	0	382	0	0	595	0	0	0
d__Bacteria;p__Firmicutes;c__Clostridia;o__Clostridia_UCG-014;f__Clostridia_UCG-014;g__Clostridia_UCG-014	0	0	0	10	0	0	0	0	0	0	0	2	0	91	0	0	117	0	0	0	0	290	0	0	0	34	0	0	9	0	0	0	0	0	0	0	0	385	0	0	20	0	86	3	0	0	0	0	0
d__Bacteria;p__Firmicutes;c__Clostridia;o__Oscillospirales;__unclassification;__unclassification	0	0	0	0	0	0	0	0	0	0	0	0	0	0	0	0	0	0	0	0	0	2	0	0	0	0	0	0	0	0	0	0	0	0	0	0	0	0	0	0	0	0	0	0	0	0	0	0	0
d__Bacteria;p__Firmicutes;c__Clostridia;o__Lachnospirales;f__Lachnospiraceae;g__Lachnospiraceae_NK4A136_group	0	0	412	94	26	190	0	0	144	0	0	42	0	12	34	0	91	0	0	0	0	96	0	28	155	42	0	0	0	0	49	0	0	0	0	0	0	0	0	0	0	0	227	0	0	42	18	228	23
d__Bacteria;p__Firmicutes;c__Clostridia;o__Lachnospirales;f__Lachnospiraceae;g__Cellulosilyticum	0	0	0	0	0	0	0	0	0	0	0	0	0	0	0	0	0	0	0	0	0	0	0	6	0	0	0	0	0	0	0	0	0	57	0	0	0	0	0	0	0	0	134	0	0	0	0	0	0
d__Bacteria;p__Firmicutes;c__Clostridia;o__Christensenellales;f__Christensenellaceae;g__Christensenella	0	0	0	0	0	0	0	0	0	0	0	0	0	0	0	0	0	0	0	0	0	0	0	0	0	0	0	0	0	0	0	0	0	0	0	0	0	0	0	0	0	0	0	0	0	0	0	0	0
d__Bacteria;p__Firmicutes;c__Clostridia;o__Peptostreptococcales-Tissierellales;f__Anaerovoracaceae;g__Family_XIII_AD3011_group	0	0	53	58	30	27	0	10	0	0	0	0	0	68	0	0	0	0	0	57	0	11	0	0	0	30	42	0	6	0	0	0	0	0	0	0	0	7	0	0	3	9	22	0	0	7	7	0	0
d__Bacteria;p__Firmicutes;c__Clostridia;o__Peptostreptococcales-Tissierellales;f__Peptostreptococcales-Tissierellales;g__Anaerococcus	25	0	803	290	795	112	9	440	0	420	337	258	5	1331	437	2199	56	732	0	1171	2177	468	171	265	0	80	8	0	472	129	2765	1049	0	3492	665	0	399	1142	39	7534	336	540	8350	279	4464	1321	0	0	1981
d__Bacteria;p__Firmicutes;c__Clostridia;o__Lachnospirales;f__Lachnospiraceae;g__Lachnospiraceae_NC2004_group	0	0	0	0	0	0	0	0	0	0	20	0	69	0	0	0	0	0	0	0	0	0	0	0	0	5	0	0	0	0	0	0	0	0	0	0	0	0	0	0	0	0	0	0	0	0	0	0	0
d__Bacteria;p__Firmicutes;c__Clostridia;o__Oscillospirales;f__Butyricicoccaceae;g__UCG-009	0	0	6	0	0	0	0	0	0	0	0	0	0	0	12	0	0	0	0	0	0	11	0	0	0	0	0	0	0	0	0	0	0	8	0	0	0	0	0	0	0	0	11	0	0	0	0	0	0
d__Bacteria;p__Firmicutes;c__Clostridia;o__Peptostreptococcales-Tissierellales;f__Peptostreptococcales-Tissierellales;g__Finegoldia	5200	0	2335	1445	14309	119	0	1236	0	1671	2639	686	0	5527	655	4849	86	5537	62	2427	15663	149	1752	343	50	223	0	0	541	335	1357	963	0	7031	3270	5	10363	5705	158	3170	175	459	6861	2027	5648	430	35	0	411
d__Bacteria;p__Bacteroidota;c__Bacteroidia;o__Bacteroidales;f__Rikenellaceae;g__Rikenellaceae_RC9_gut_group	0	0	0	0	110	18	0	0	0	0	0	0	0	0	0	0	8	0	0	0	0	0	0	0	0	0	0	0	0	0	0	0	0	0	0	0	0	0	0	0	0	13	4	0	0	0	5	0	0
d__Bacteria;p__Firmicutes;c__Negativicutes;o__Veillonellales-Selenomonadales;f__Veillonellaceae;g__Dialister	0	203	0	472	7	260	0	0	89	0	36	0	0	381	277	1320	0	0	16	165	0	1688	29	25	0	11	0	0	130	0	208	44	0	0	81	14	481	241	0	163	142	66	27	132	42	168	45	10	533
d__Bacteria;p__Bacteroidota;c__Bacteroidia;o__Bacteroidales;f__Barnesiellaceae;g__Barnesiella	0	0	0	0	0	71	0	0	0	0	0	0	0	0	0	0	0	0	0	0	0	192	0	0	0	11	0	0	0	3	0	0	0	0	0	0	0	0	0	0	0	32	0	6	0	0	0	0	0
d__Bacteria;p__Bacteroidota;c__Bacteroidia;o__Bacteroidales;f__Marinifilaceae;g__Butyricimonas	0	0	13	0	0	31	0	0	0	0	0	0	0	59	0	0	0	0	0	0	0	0	0	0	0	0	36	0	0	0	0	0	0	10	0	0	0	0	0	0	0	23	0	9	0	0	0	0	0
d__Bacteria;p__Firmicutes;c__Clostridia;o__Clostridia_vadinBB60_group;f__Clostridia_vadinBB60_group;g__Clostridia_vadinBB60_group	0	0	0	0	43	5	0	0	0	0	0	0	0	0	0	0	0	0	0	0	0	123	0	0	0	0	0	0	0	0	0	0	0	0	0	0	0	0	0	0	0	11	7	0	0	9	0	0	0
d__Bacteria;p__Firmicutes;c__Clostridia;o__Oscillospirales;f__Ruminococcaceae;g__Incertae_Sedis	0	0	16	11	27	176	0	35	0	8	44	0	0	39	23	0	39	15	3	0	0	23	0	4	6	0	13	0	0	0	0	0	0	0	8	21	0	0	0	3	68	4	35	25	3	11	25	0	3
d__Bacteria;p__Firmicutes;c__Clostridia;o__Oscillospirales;f__Ruminococcaceae;g__Ruminococcus	0	0	918	206	0	59	0	355	118	0	19	0	8	207	0	0	248	2	181	0	0	953	40	105	333	297	0	0	9	0	0	29	0	20	0	0	0	0	0	0	116	4	511	0	0	0	14	73	0
d__Bacteria;p__Firmicutes;c__Bacilli;o__Lactobacillales;f__Lactobacillaceae;g__Lactobacillus	0	115	0	0	5219	92	551	0	0	0	35	0	82	433	26	0	0	80	12	0	0	4	0	710	0	0	0	364	0	23	0	0	0	43	15	150	0	0	13	38	19	3962	171	0	17	6	38	114	0
d__Bacteria;p__Firmicutes;c__Clostridia;o__Oscillospirales;f__Ruminococcaceae;g__Subdoligranulum	0	0	163	156	185	334	0	454	159	0	297	0	0	230	265	0	389	0	132	0	0	604	55	557	89	540	102	0	79	10	75	136	0	0	0	0	0	22	0	0	166	165	258	0	380	79	0	0	0
d__Bacteria;p__Firmicutes;c__Clostridia;o__Oscillospirales;f__Oscillospiraceae;g__UCG-003	0	0	66	25	66	226	0	0	0	0	0	6	0	16	0	0	0	0	20	0	0	39	0	44	0	30	34	0	25	0	0	27	0	0	10	0	0	0	0	0	0	17	50	18	0	4	0	0	0
d__Bacteria;p__Bacteroidota;c__Bacteroidia;o__Bacteroidales;f__Rikenellaceae;g__Alistipes	0	0	0	13	0	30	0	0	0	0	0	0	0	153	10	0	3	0	0	0	0	129	0	23	0	270	11	0	0	9	0	22	0	33	0	132	0	0	0	0	0	117	8	154	0	210	0	0	0
d__Bacteria;p__Bacteroidota;c__Bacteroidia;o__Bacteroidales;f__Prevotellaceae;g__uncultured	0	0	0	0	0	213	0	0	0	0	0	0	0	0	0	0	0	0	0	0	0	0	0	57	13	0	0	0	0	0	0	0	0	0	0	0	0	0	0	0	0	0	14	0	0	0	0	0	0
d__Bacteria;p__Firmicutes;c__Bacilli;o__Lactobacillales;f__Streptococcaceae;g__Streptococcus	0	0	3556	0	1113	64	48	96	57	237	422	23	173	968	998	288	38	4922	124	2461	23	6	171	2230	158	2098	731	624	124	39	1181	58	0	0	169	947	453	42	26	1981	161	83	699	3039	367	4823	7	234	191
d__Bacteria;p__Firmicutes;c__Clostridia;o__Lachnospirales;f__Lachnospiraceae;g__Roseburia	0	0	0	27	0	153	0	0	174	0	0	0	0	0	0	0	2985	0	0	0	0	137	0	240	349	48	25	0	0	35	698	0	0	0	2581	0	0	0	30	0	74	0	39	54	0	197	0	81	43
d__Bacteria;p__Bacteroidota;c__Bacteroidia;o__Bacteroidales;f__Prevotellaceae;g__Prevotellaceae_UCG-001	0	0	0	0	0	0	0	0	0	0	0	0	0	0	0	0	0	0	0	0	0	0	0	0	0	0	0	0	0	0	0	0	0	0	0	0	0	0	0	0	0	0	0	0	0	0	0	0	0
d__Bacteria;p__Firmicutes;__unclassification;__unclassification;__unclassification;__unclassification	0	0	0	0	0	0	0	0	0	0	0	0	0	0	0	0	0	0	0	0	0	0	0	0	0	0	0	0	0	0	0	0	0	0	0	0	0	0	0	0	0	0	0	0	0	0	0	0	0
d__Bacteria;p__Verrucomicrobiota;c__Lentisphaeria;o__Victivallales;f__vadinBE97;g__vadinBE97	0	0	0	0	0	0	0	0	0	0	0	0	0	0	0	0	0	0	0	0	0	0	0	0	0	0	0	0	7	0	0	0	0	0	0	0	0	0	0	0	0	0	0	0	0	0	0	0	0
d__Bacteria;p__Firmicutes;c__Clostridia;o__Oscillospirales;f__Ruminococcaceae;__unclassification	0	0	0	119	0	0	0	911	0	0	20	0	0	0	0	0	0	0	142	0	0	0	0	0	0	0	0	0	0	0	0	0	0	0	0	0	0	0	0	0	0	122	0	3	0	0	0	0	3
d__Bacteria;p__Firmicutes;c__Clostridia;o__Peptostreptococcales-Tissierellales;f__Anaerovoracaceae;__unclassification	0	0	0	0	0	0	0	0	0	0	0	0	0	0	0	0	0	0	0	0	0	0	0	0	0	0	0	0	0	0	0	0	0	0	0	0	0	0	0	0	0	0	0	0	0	0	0	0	0
d__Bacteria;p__Firmicutes;c__Clostridia;o__Oscillospirales;f__Ruminococcaceae;g__Phocea	0	0	0	0	0	0	0	0	0	0	0	0	0	0	0	0	0	0	0	0	0	0	0	0	0	0	0	0	0	0	0	0	0	0	0	0	0	0	0	0	0	0	0	0	0	0	0	0	0
d__Bacteria;p__Firmicutes;c__Clostridia;o__Lachnospirales;f__Lachnospiraceae;g__Lachnoclostridium	177	0	178	42	0	198	0	0	62	0	591	43	0	39	64	0	201	0	25	0	0	581	15	162	108	61	41	0	77	8	0	39	0	43	87	167	0	17	0	9	56	61	21	102	93	224	0	0	0
d__Bacteria;p__Firmicutes;c__Clostridia;o__Oscillospirales;f__Oscillospiraceae;g__Oscillibacter	0	0	37	0	0	0	0	47	0	0	0	0	0	0	0	0	0	0	0	0	0	14	0	0	23	0	0	0	0	0	0	0	0	0	12	0	0	0	0	0	0	0	6	0	0	7	0	0	0
d__Bacteria;p__Firmicutes;c__Clostridia;o__Oscillospirales;f__UCG-010;g__UCG-010	0	0	0	80	0	49	0	0	0	0	0	0	0	11	0	0	0	0	0	0	0	14	0	0	0	0	0	0	0	0	0	0	0	0	0	0	0	0	0	0	0	0	41	4	0	0	0	0	6
d__Bacteria;p__Bacteroidota;c__Bacteroidia;o__Bacteroidales;f__Barnesiellaceae;g__Coprobacter	0	0	0	0	0	0	0	0	0	0	0	0	0	0	0	0	0	0	0	0	0	39	0	0	0	0	0	0	0	0	0	0	0	0	0	0	0	0	0	0	0	0	0	0	0	0	0	0	0
d__Bacteria;p__Actinobacteriota;c__Coriobacteriia;o__Coriobacteriales;f__Atopobiaceae;g__Olsenella	0	0	0	10	0	0	0	17	0	0	0	12	110	23	0	0	11	0	0	0	0	0	0	0	0	0	0	0	0	0	0	5	0	0	0	0	0	19	0	0	0	0	0	0	0	27	0	0	0
d__Bacteria;p__Firmicutes;c__Bacilli;o__Erysipelotrichales;f__Erysipelatoclostridiaceae;g__Catenibacterium	0	0	0	0	0	154	0	557	33	0	0	0	0	0	0	0	910	0	0	0	0	0	81	88	26	43	0	0	62	0	0	0	0	0	0	0	0	0	0	0	298	0	88	0	0	0	0	0	0
d__Bacteria;p__Firmicutes;c__Bacilli;o__Erysipelotrichales;f__Erysipelotrichaceae;g__[Clostridium]_innocuum_group	0	0	0	0	0	0	0	0	0	0	202	0	0	0	0	0	0	0	0	0	0	0	0	0	0	0	0	31	0	112	0	0	0	0	14	15	0	0	0	72	0	0	0	84	0	13	0	0	0
d__Bacteria;p__Proteobacteria;c__Alphaproteobacteria;o__Rhizobiales;f__Xanthobacteraceae;__unclassification	0	0	0	0	0	0	0	0	0	0	0	0	0	0	0	0	0	0	0	0	0	0	0	0	0	0	0	0	0	0	0	0	0	0	0	0	0	0	0	0	0	0	0	0	0	0	0	0	0
d__Bacteria;p__Fusobacteriota;c__Fusobacteriia;o__Fusobacteriales;f__Fusobacteriaceae;g__Fusobacterium	29	0	0	8	7	0	0	0	0	256	0	373	0	0	0	19	0	0	0	230	0	9	0	0	0	654	3006	0	11	11	39	7	0	0	0	0	27	0	0	11	0	0	100	0	0	987	0	0	0
d__Bacteria;p__Firmicutes;c__Clostridia;o__Christensenellales;f__Christensenellaceae;__unclassification	0	0	0	0	0	0	0	0	0	0	0	0	0	0	0	0	0	0	0	0	0	0	0	0	0	0	0	0	0	0	0	0	0	0	0	0	0	0	0	0	0	0	0	0	0	0	0	0	0
d__Bacteria;p__Firmicutes;c__Bacilli;o__Erysipelotrichales;f__Erysipelotrichaceae;g__Dielma	0	0	0	0	0	0	0	0	0	0	0	0	0	0	0	0	0	0	0	0	0	0	0	0	0	0	0	0	0	0	0	0	0	0	0	0	0	0	0	0	0	0	0	0	0	0	0	0	0
d__Bacteria;p__Proteobacteria;c__Gammaproteobacteria;o__Burkholderiales;f__Burkholderiaceae;g__Ralstonia	0	0	0	0	0	0	0	0	0	0	0	0	0	0	0	0	0	0	0	0	0	0	0	0	0	0	0	0	0	0	0	0	0	0	0	0	0	0	0	0	0	0	0	0	0	0	0	6	0
d__Bacteria;p__Firmicutes;c__Clostridia;o__Lachnospirales;f__Lachnospiraceae;g__Coprococcus	0	0	766	269	464	637	0	36	240	0	0	0	0	174	172	20	793	0	54	49	0	777	45	255	82	292	1988	0	137	0	319	18	0	41	0	59	0	50	0	0	247	137	800	97	0	561	36	0	100
d__Bacteria;p__Firmicutes;c__Clostridia;o__Peptostreptococcales-Tissierellales;f__Peptostreptococcaceae;g__Intestinibacter	0	0	0	29	0	0	0	66	0	0	0	0	36	17	0	0	0	0	0	0	0	90	0	51	0	0	0	0	0	0	0	0	0	102	113	0	0	0	0	1104	133	142	1115	15	81	62	0	84	410
d__Bacteria;p__Proteobacteria;c__Gammaproteobacteria;o__Burkholderiales;f__Comamonadaceae;g__Pelomonas	0	0	0	0	0	0	0	0	0	0	0	0	0	0	0	0	0	0	0	0	0	0	0	0	0	0	0	0	0	0	0	0	0	0	0	0	0	0	0	0	0	0	0	0	0	0	0	0	0
d__Bacteria;p__Firmicutes;c__Clostridia;o__Lachnospirales;f__Defluviitaleaceae;g__Defluviitaleaceae_UCG-011	0	0	0	0	0	0	0	0	0	0	0	0	0	3	0	0	0	0	0	0	0	0	0	0	0	0	0	0	0	0	0	0	0	0	0	0	0	0	0	0	0	0	0	0	0	0	0	0	0
d__Bacteria;p__Firmicutes;c__Negativicutes;o__Acidaminococcales;f__Acidaminococcaceae;g__Phascolarctobacterium	9	0	192	0	94	0	0	67	0	0	45	0	0	0	0	0	142	0	35	0	0	0	29	170	62	56	62	0	0	0	50	0	0	26	0	0	0	28	0	0	0	0	74	0	0	0	0	0	0
d__Bacteria;p__Firmicutes;c__Clostridia;o__Lachnospirales;f__Lachnospiraceae;g__[Ruminococcus]_gauvreauii_group	0	0	0	72	0	409	0	0	131	0	42	0	0	102	57	0	117	0	69	0	0	294	0	117	0	208	245	0	49	0	57	0	0	0	0	14	0	0	0	16	125	30	146	0	0	0	0	0	0
d__Bacteria;p__Actinobacteriota;c__Actinobacteria;o__Corynebacteriales;f__Corynebacteriaceae;g__Corynebacterium	0	4329	0	58	338	23	0	149	0	13	1625	681	0	1615	195	250	11	86	11	199	1598	0	3594	59	0	183	0	50	0	28	1723	0	6318	4586	90	0	60	318	18	732	9	21656	1053	20	22	7	0	156	141
d__Bacteria;p__Firmicutes;c__Clostridia;o__Peptostreptococcales-Tissierellales;f__Peptostreptococcales-Tissierellales;g__Murdochiella	0	0	0	1451	0	0	0	7	0	0	6	0	0	560	9	130	9	60	63	0	35	43	0	72	0	136	0	0	627	30	195	0	0	1309	0	0	26	1894	25	517	401	41	478	0	2567	0	0	0	759
d__Bacteria;p__Firmicutes;c__Clostridia;o__Monoglobales;f__Monoglobaceae;g__Monoglobus	0	0	0	25	0	0	0	37	0	0	0	0	0	37	0	0	14	0	0	0	0	103	0	0	0	12	0	0	20	0	0	0	0	0	0	0	0	0	0	0	0	36	0	0	0	0	0	31	0
d__Bacteria;p__Firmicutes;c__Clostridia;o__Lachnospirales;f__Lachnospiraceae;g__[Eubacterium]_eligens_group	0	0	19	99	0	38	0	79	107	0	0	0	0	85	48	0	0	0	0	0	0	0	0	58	26	82	0	0	0	0	0	16	0	0	0	354	0	0	0	0	0	130	57	0	0	0	0	0	0
d__Bacteria;p__Firmicutes;c__Bacilli;o__Erysipelotrichales;f__Erysipelatoclostridiaceae;g__UCG-004	0	0	0	0	0	0	0	0	0	0	0	0	0	0	0	0	0	0	0	0	0	0	0	0	0	0	0	0	0	0	0	0	0	0	0	0	0	0	0	0	0	0	0	0	0	0	0	0	0
d__Bacteria;p__Proteobacteria;c__Gammaproteobacteria;o__Enterobacterales;f__Enterobacteriaceae;g__Escherichia-Shigella	46	510	238	107	21	11114	0	0	0	25	0	9	4	51	41	0	2	35203	1210	25	0	0	0	2068	118	37	8819	8804	8	8629	146	279	0	25	309	12225	812	0	2643	0	0	12	568	45	63	722	33	141	0
d__Bacteria;p__Desulfobacterota;c__Desulfovibrionia;o__Desulfovibrionales;f__Desulfovibrionaceae;g__Mailhella	0	0	0	0	0	0	0	0	0	0	0	0	0	0	0	0	0	0	0	0	0	0	0	0	0	0	0	0	0	0	0	0	0	0	0	0	0	0	0	0	0	0	0	0	0	0	0	0	0
d__Bacteria;__unclassification;__unclassification;__unclassification;__unclassification;__unclassification	0	0	0	0	0	0	0	0	0	0	33	0	0	0	0	19	0	0	0	0	0	0	0	31	0	0	0	0	0	0	0	10	0	0	0	0	0	0	0	0	160	2	2	0	0	6	0	229	0
d__Bacteria;p__Proteobacteria;c__Gammaproteobacteria;o__Pasteurellales;f__Pasteurellaceae;g__Haemophilus	0	0	0	0	0	243	0	0	0	44	0	0	0	8	0	0	0	0	0	49	0	0	6	14	0	0	54	0	0	0	1534	0	0	0	21	13	0	3	0	123	47	0	143	0	0	21	0	0	469
d__Bacteria;p__Firmicutes;c__Negativicutes;o__Veillonellales-Selenomonadales;f__Veillonellaceae;g__Allisonella	0	0	0	0	0	34	0	0	0	0	0	0	0	0	0	0	21	0	0	0	0	2	0	9	0	0	0	0	0	0	0	0	0	0	18	0	0	11	0	0	0	0	0	0	0	0	0	0	10
d__Bacteria;p__Spirochaetota;c__Brachyspirae;o__Brachyspirales;f__Brachyspiraceae;g__Brachyspira	0	0	0	0	0	0	0	0	0	0	0	0	0	0	0	0	0	0	0	0	0	0	0	0	0	0	0	0	0	0	0	0	0	0	0	0	0	0	0	0	0	0	0	0	0	0	0	0	0
d__Bacteria;p__Bacteroidota;c__Bacteroidia;o__Bacteroidales;f__Porphyromonadaceae;g__Porphyromonas	0	0	0	173	457	0	0	0	0	0	18	24039	0	773	312	149	37	0	62	0	24	90	0	265	0	225	33	0	198	86	409	31	0	743	186	0	4	327	0	209	544	192	137	730	675	16	73	0	6981
d__Bacteria;p__Firmicutes;c__Clostridia;o__Lachnospirales;f__Lachnospiraceae;g__uncultured	0	0	97	37	0	124	0	0	0	0	0	40	35	64	0	0	34	0	30	0	0	68	12	47	18	117	18	0	0	0	0	0	0	0	0	0	0	0	0	0	0	0	0	0	0	0	0	21	0
d__Bacteria;p__Actinobacteriota;c__Coriobacteriia;o__Coriobacteriales;f__Eggerthellaceae;__unclassification	0	0	0	0	0	0	0	0	0	0	0	0	0	23	0	0	0	0	0	0	0	0	0	0	0	0	0	0	0	0	0	0	0	0	0	0	0	0	0	0	0	22	19	0	0	0	0	0	0
d__Bacteria;p__Firmicutes;c__Clostridia;o__Oscillospirales;f__Oscillospiraceae;g__Intestinimonas	0	0	0	0	0	0	0	0	0	0	30	0	0	0	0	0	0	0	0	0	0	0	0	0	0	0	0	0	0	0	0	0	0	0	0	0	0	0	0	0	0	0	0	0	0	25	0	0	0
d__Bacteria;p__Actinobacteriota;c__Actinobacteria;o__Actinomycetales;f__Actinomycetaceae;g__Actinotignum	0	0	0	0	0	0	0	0	0	0	0	0	0	0	0	0	0	0	0	0	0	0	0	0	0	0	0	0	0	0	7	0	0	0	0	0	0	0	0	0	0	0	0	0	0	0	0	0	0
d__Bacteria;p__Firmicutes;c__Negativicutes;o__Veillonellales-Selenomonadales;f__Veillonellaceae;g__Megasphaera	47	0	0	0	0	209	0	0	0	0	0	0	0	573	95	65	30	0	0	157	0	0	10	21	30	0	0	0	0	0	0	691	0	0	132	31	0	977	0	0	3	0	0	0	0	0	80	0	0
d__Bacteria;p__Actinobacteriota;c__Actinobacteria;o__Bifidobacteriales;f__Bifidobacteriaceae;g__Scardovia	0	0	0	0	0	0	0	0	0	0	0	0	0	0	0	0	0	0	0	0	0	0	0	0	0	0	0	0	0	0	0	0	0	0	0	0	0	0	0	0	0	0	0	0	0	0	0	0	0
d__Bacteria;p__Firmicutes;c__Bacilli;o__RF39;f__RF39;g__RF39	0	0	0	0	0	0	0	0	0	0	0	0	0	0	0	0	0	0	0	0	0	32	0	0	0	0	0	0	0	0	0	0	0	0	0	0	0	0	0	0	0	0	0	0	0	0	0	0	0
d__Bacteria;p__Firmicutes;c__Clostridia;o__Oscillospirales;f__Butyricicoccaceae;g__Butyricicoccus	0	0	0	24	0	95	0	0	20	0	0	0	0	39	0	0	49	9	0	0	0	164	14	61	28	36	0	0	0	0	19	0	0	9	8	0	0	0	0	0	22	0	0	0	31	28	0	13	0
d__Bacteria;p__Proteobacteria;c__Gammaproteobacteria;o__Enterobacterales;f__Enterobacteriaceae;g__Enterobacter	0	59	0	0	196	163	0	24	0	0	0	0	0	58	0	0	9	557	0	0	169	0	792	87	14	0	35	212	0	134	146	0	184	0	2337	0	597	0	28	0	0	0	0	0	110	0	0	0	0
d__Bacteria;p__Firmicutes;c__Clostridia;o__Oscillospirales;f__Oscillospiraceae;__unclassification	0	0	316	0	198	0	0	0	0	0	0	0	0	0	0	0	0	0	0	0	0	0	10	35	0	2	0	0	3	0	0	0	0	0	0	0	0	9	0	0	0	16	70	0	0	0	0	0	0
d__Bacteria;p__Proteobacteria;c__Gammaproteobacteria;o__Pasteurellales;f__Pasteurellaceae;g__Aggregatibacter	0	0	0	0	0	0	0	0	0	0	0	0	0	0	0	0	0	0	0	0	0	0	0	0	0	0	0	0	0	0	13	0	0	0	0	0	0	0	0	0	0	0	9	0	0	32	0	0	0
d__Bacteria;p__Firmicutes;c__Clostridia;o__Peptostreptococcales-Tissierellales;f__Peptostreptococcales-Tissierellales;g__Fenollaria	0	0	0	3271	18	0	5	0	14	0	0	301	0	4506	2178	1456	46	0	146	0	155	261	0	2906	0	285	0	0	1300	62	2163	0	0	0	0	0	0	1403	33	43	7770	785	1319	241	1605	0	25	0	95
d__Bacteria;p__Firmicutes;c__Clostridia;o__Lachnospirales;f__Lachnospiraceae;g__Lachnospiraceae_ND3007_group	0	0	17	31	25	57	0	158	64	0	0	0	0	101	55	0	154	0	29	0	0	205	21	99	33	24	0	0	30	0	35	0	0	14	181	162	0	0	0	0	42	65	112	0	46	0	0	0	0
d__Bacteria;p__Proteobacteria;c__Gammaproteobacteria;o__Enterobacterales;f__Enterobacteriaceae;g__Kosakonia	0	0	0	0	0	0	0	0	0	0	0	0	0	0	0	0	0	0	0	0	0	0	0	0	0	0	0	0	0	0	0	0	0	0	20	0	0	0	0	0	0	0	0	0	0	0	0	0	0
d__Bacteria;p__Proteobacteria;c__Gammaproteobacteria;o__Aeromonadales;f__Aeromonadaceae;g__Aeromonas	0	2	0	0	22	0	0	0	0	0	0	0	0	0	0	0	0	60	0	0	30	0	63	0	0	0	0	18	0	0	16	0	19	0	45	0	0	0	0	0	0	0	0	0	0	0	0	0	0
d__Bacteria;p__Proteobacteria;c__Gammaproteobacteria;o__Pseudomonadales;f__Moraxellaceae;g__Enhydrobacter	0	0	0	0	0	0	0	0	0	0	0	0	0	0	0	0	0	0	0	0	5	0	0	0	0	0	0	0	0	0	0	0	0	0	0	0	0	0	0	0	0	0	0	0	0	0	0	8	0
d__Bacteria;p__Firmicutes;c__Clostridia;__unclassification;__unclassification;__unclassification	0	0	0	10	0	0	0	0	0	0	0	0	175	0	0	0	0	0	0	0	0	3	0	0	0	0	0	0	0	0	0	0	0	0	0	0	0	0	0	0	0	6	2	0	0	0	7	0	17
d__Bacteria;p__Firmicutes;c__Clostridia;o__Peptostreptococcales-Tissierellales;f__Anaerovoracaceae;g__S5-A14a	0	0	0	487	8	0	0	0	0	0	0	0	0	623	410	218	8	0	45	0	118	99	0	204	0	21	0	0	257	0	55	0	0	0	0	0	0	40	0	180	21	184	173	211	207	10	0	0	665
d__Bacteria;p__Proteobacteria;c__Gammaproteobacteria;o__Burkholderiales;f__Sutterellaceae;g__Parasutterella	0	0	0	0	0	6	0	0	0	0	19	0	0	0	0	0	0	0	0	0	0	330	0	5	0	0	0	0	0	0	0	0	0	0	136	32	0	2	0	0	0	0	0	0	178	55	0	9	0
d__Bacteria;p__Firmicutes;c__Clostridia;o__Oscillospirales;f__Ruminococcaceae;g__[Eubacterium]_siraeum_group	0	0	77	198	31	13	0	32	0	0	0	0	0	0	0	0	0	0	0	0	0	19	6	0	0	0	0	0	0	0	0	0	0	7	0	0	0	0	0	0	0	21	162	0	0	0	7	0	0
d__Bacteria;p__Firmicutes;c__Clostridia;o__Lachnospirales;f__Lachnospiraceae;g__Anaerostipes	0	0	16	0	0	50	0	88	73	0	0	0	0	57	19	0	282	0	0	115	0	502	129	0	0	36	0	0	16	0	71	0	0	0	51	404	0	15	0	0	124	34	91	0	367	47	0	183	76
d__Bacteria;p__Proteobacteria;c__Gammaproteobacteria;o__Pseudomonadales;f__Moraxellaceae;g__Acinetobacter	0	0	0	0	7	0	0	0	0	0	0	0	227	0	0	0	0	15	0	0	0	0	13	0	0	0	4	0	0	0	4	0	0	0	16	0	0	0	0	0	0	0	0	0	14	0	0	66	0
d__Bacteria;p__Firmicutes;c__Clostridia;o__Lachnospirales;f__Lachnospiraceae;g__Agathobacter	0	0	27	0	0	371	0	120	257	0	0	0	0	77	188	0	45	0	90	0	0	1082	0	322	367	463	91	0	178	0	41	0	0	37	0	0	0	8	0	0	38	96	116	0	137	42	28	28	0
d__Bacteria;p__Firmicutes;c__Clostridia;o__Peptostreptococcales-Tissierellales;f__Peptostreptococcales-Tissierellales;g__Peptoniphilus	101	0	351	2052	1556	0	0	18	0	94	465	394	50	5709	992	3527	58	791	416	854	4902	527	290	1434	0	711	0	0	801	226	5707	68	0	5771	1232	20	91	4343	91	5418	2246	674	4536	2322	5272	1425	19	0	6559
d__Bacteria;p__Bacteroidota;c__Bacteroidia;o__Flavobacteriales;f__Flavobacteriaceae;g__Flavobacterium	0	0	0	0	0	0	0	0	0	0	0	0	0	0	0	0	0	0	0	0	7	0	3	0	0	0	0	0	0	0	0	0	0	0	0	0	0	0	0	0	0	0	0	0	0	0	0	0	0
d__Bacteria;p__Firmicutes;c__Clostridia;o__Christensenellales;f__Christensenellaceae;g__Christensenellaceae	0	0	0	0	0	0	0	0	0	0	0	0	0	0	0	0	0	0	0	0	0	0	0	0	0	0	0	0	0	0	0	0	0	0	0	0	0	0	0	0	0	0	0	0	0	0	0	0	0
d__Bacteria;p__Firmicutes;c__Clostridia;o__Christensenellales;f__Christensenellaceae;g__Catabacter	0	0	0	0	0	0	0	0	0	0	0	0	0	0	0	0	0	0	0	0	0	0	0	0	0	0	0	0	0	0	0	0	0	0	0	0	0	0	0	0	0	0	0	0	0	0	0	0	0
d__Bacteria;p__Firmicutes;c__Clostridia;o__Lachnospirales;f__Lachnospiraceae;g__[Eubacterium]_ventriosum_group	0	0	0	144	0	0	0	0	16	0	0	0	0	0	0	0	0	0	13	0	0	0	0	15	0	0	0	0	18	0	0	0	0	54	0	0	0	0	0	0	0	6	0	0	0	0	0	0	4
d__Bacteria;p__Cyanobacteria;c__Vampirivibrionia;o__Gastranaerophilales;f__Gastranaerophilales;g__Gastranaerophilales	0	0	0	15	0	2	0	0	0	0	0	0	0	0	0	0	0	0	0	0	0	0	0	0	0	0	0	0	0	0	0	0	0	0	0	0	0	0	0	0	0	0	0	0	0	0	0	0	0
d__Bacteria;p__Actinobacteriota;c__Actinobacteria;o__Corynebacteriales;f__Corynebacteriaceae;__unclassification	0	0	0	0	0	0	0	0	0	0	0	0	0	0	0	0	0	0	0	0	0	0	0	0	0	0	0	0	0	0	2	0	0	0	0	0	0	0	0	0	0	0	0	0	3	0	0	2	0
d__Bacteria;p__Proteobacteria;c__Gammaproteobacteria;o__Enterobacterales;f__Yersiniaceae;g__Serratia	0	0	0	0	0	0	0	0	0	0	0	0	0	0	0	0	0	0	0	0	0	0	0	0	0	0	0	0	0	0	0	0	0	0	0	0	0	0	0	0	0	0	0	0	0	0	0	0	0
d__Bacteria;p__Firmicutes;c__Clostridia;o__Oscillospirales;f__Oscillospiraceae;g__NK4A214_group	0	0	0	30	48	51	0	22	18	0	0	0	0	53	0	0	0	0	13	0	0	61	0	8	53	47	20	0	0	0	0	0	0	16	0	0	0	0	0	5	0	12	50	12	0	11	32	0	8
d__Bacteria;p__Elusimicrobiota;c__Elusimicrobia;o__Elusimicrobiales;f__Elusimicrobiaceae;g__Elusimicrobium	0	0	0	50	0	0	0	0	0	0	0	0	0	0	0	0	0	0	0	0	0	0	0	0	0	0	0	0	0	0	0	0	0	0	0	0	0	0	0	0	0	0	0	0	0	0	0	0	0
d__Bacteria;p__Firmicutes;c__Bacilli;o__Erysipelotrichales;f__Erysipelotrichaceae;g__Erysipelotrichaceae_UCG-009	0	0	0	0	0	0	0	0	0	0	0	0	0	0	0	0	0	0	0	0	0	0	0	0	0	0	0	0	0	0	0	0	0	0	0	0	0	0	0	0	0	0	0	0	0	0	0	0	0
d__Bacteria;p__Myxococcota;c__Polyangia;o__Polyangiales;f__Polyangiaceae;__unclassification	0	0	0	0	0	0	0	0	0	0	0	0	0	0	0	0	0	0	0	0	0	0	0	0	0	0	0	0	0	0	0	0	0	0	0	0	0	2	0	0	0	0	0	0	0	0	0	0	0
d__Bacteria;p__Firmicutes;c__Bacilli;o__Lactobacillales;f__Aerococcaceae;g__Aerococcus	0	0	0	0	0	0	0	0	0	0	0	0	0	0	0	0	0	0	0	0	0	0	0	0	0	0	0	0	0	0	0	0	0	0	0	0	0	0	0	0	0	0	7	0	0	0	0	0	0
d__Bacteria;p__Firmicutes;c__Clostridia;o__Lachnospirales;f__Lachnospiraceae;g__[Eubacterium]_fissicatena_group	0	0	0	0	31	0	0	0	0	0	0	0	0	0	0	0	0	0	0	0	0	0	0	0	0	0	0	0	0	0	0	0	0	0	0	0	0	0	0	0	0	0	0	0	0	0	0	0	0
d__Bacteria;p__Patescibacteria;c__Saccharimonadia;o__Saccharimonadales;f__Saccharimonadaceae;g__Saccharimonadaceae	0	0	0	0	0	0	0	0	0	0	0	0	0	0	0	0	0	0	0	0	0	0	0	0	0	0	0	0	0	0	0	0	0	0	0	0	0	0	0	0	0	0	0	0	0	0	0	0	0
d__Bacteria;p__Firmicutes;c__Clostridia;o__Oscillospirales;f__Oscillospiraceae;g__Colidextribacter	3	0	17	0	15	0	0	106	0	0	0	0	0	0	0	0	0	0	0	0	0	24	0	24	26	0	7	0	0	0	29	0	0	0	0	0	0	0	0	0	0	0	16	13	0	78	0	0	0
d__Bacteria;p__Bacteroidota;c__Bacteroidia;o__Bacteroidales;f__Prevotellaceae;g__Paraprevotella	0	0	0	0	0	190	0	9	0	0	0	0	0	6	0	0	43	0	0	0	0	51	0	67	0	26	0	0	0	0	0	0	0	0	0	0	0	0	0	0	0	29	0	0	0	0	0	0	0
d__Bacteria;p__Firmicutes;c__Clostridia;o__Clostridia;f__Hungateiclostridiaceae;g__Fastidiosipila	0	0	0	395	0	0	0	0	0	0	13	0	0	645	22	0	0	0	10	0	0	0	0	33	0	0	0	0	0	0	25	0	0	488	0	0	0	154	0	19	0	32	145	0	0	0	0	0	593
d__Bacteria;p__Firmicutes;c__Bacilli;o__Erysipelotrichales;f__Erysipelotrichaceae;g__Holdemanella	0	0	0	111	69	11	0	50	0	0	0	0	0	201	24	0	0	0	0	0	0	0	207	34	0	111	0	0	19	0	32	16	0	0	0	0	0	21	0	0	10	0	84	0	0	0	0	0	0
d__Bacteria;p__Bacteroidota;c__Bacteroidia;o__Bacteroidales;f__Barnesiellaceae;g__uncultured	0	0	0	0	0	0	0	0	0	0	0	0	0	0	0	0	0	0	0	0	0	0	0	0	0	0	0	0	0	0	0	0	0	0	0	0	0	0	0	0	0	0	0	0	0	0	0	0	0
d__Bacteria;p__Actinobacteriota;c__Coriobacteriia;o__Coriobacteriales;f__Atopobiaceae;g__Atopobium	0	6058	0	0	0	0	0	0	0	0	0	0	0	202	13	310	0	0	0	0	0	0	0	0	0	13	0	0	0	0	0	0	0	0	0	0	0	0	0	0	84	0	0	0	32	64	0	0	19
d__Bacteria;p__Bacteroidota;c__Bacteroidia;o__Flavobacteriales;f__Flavobacteriaceae;g__uncultured	0	0	0	0	0	0	0	0	0	0	0	0	0	0	0	0	0	0	0	0	0	0	0	0	0	0	0	0	0	0	0	0	0	0	0	0	0	0	0	0	0	0	0	0	0	0	0	0	0
d__Bacteria;p__Firmicutes;c__Clostridia;o__Lachnospirales;f__Lachnospiraceae;g__Moryella	0	0	0	26	5	0	0	0	0	0	0	23	0	0	122	0	0	0	60	0	0	0	0	0	0	0	0	0	0	0	0	0	0	0	0	0	0	0	0	0	28	0	6	0	0	16	0	0	25
d__Bacteria;p__Actinobacteriota;c__Actinobacteria;o__Bifidobacteriales;f__Bifidobacteriaceae;g__Bifidobacterium	0	1419	0	0	0	0	1812	1107	1217	10	0	0	0	2550	439	0	16712	32	10	22	0	191	37	119	0	24	7	8	61	0	0	3199	0	22	6085	22	0	5210	0	581	465	607	26	52	906	61	0	693	42
d__Bacteria;p__Proteobacteria;c__Gammaproteobacteria;o__Xanthomonadales;f__Xanthomonadaceae;g__Stenotrophomonas	0	0	0	0	87	108	0	0	0	0	0	0	0	0	0	0	0	218	0	0	147	0	368	0	0	0	14	50	0	36	53	0	131	0	144	0	0	0	0	0	0	0	0	0	79	0	0	0	0
d__Bacteria;p__Firmicutes;c__Bacilli;o__Staphylococcales;f__Gemellaceae;g__Gemella	0	0	0	0	0	0	13	13	0	12	0	279	0	0	42	11	0	0	0	353	0	0	0	16	0	59	0	0	23	0	126	0	0	0	0	0	0	0	0	23	8	4	38	78	0	224	0	0	0
d__Bacteria;p__Proteobacteria;c__Gammaproteobacteria;o__Enterobacterales;f__Enterobacteriaceae;g__Klebsiella	13	0	0	0	10	0	0	105	0	0	0	0	0	0	0	0	0	0	0	0	0	0	0	494	0	0	313	167	0	0	227	72	0	0	60	0	389	0	0	0	31	20	0	0	0	0	0	0	0
d__Bacteria;p__Firmicutes;c__Clostridia;o__Lachnospirales;f__Lachnospiraceae;g__Dorea	0	0	110	200	160	1204	0	222	193	33	0	13	0	618	120	0	410	2	83	419	0	1049	53	448	262	903	349	0	240	13	333	32	0	49	0	0	0	133	0	0	727	35	201	33	677	195	0	0	61
d__Bacteria;p__Firmicutes;c__Clostridia;o__Oscillospirales;f__Ruminococcaceae;g__Candidatus_Soleaferrea	0	0	0	0	0	0	0	0	0	0	0	0	0	0	0	0	0	0	0	0	0	0	0	0	0	0	0	0	0	0	0	0	0	0	0	0	0	0	0	0	0	0	0	0	0	0	0	0	0
d__Bacteria;p__Firmicutes;c__Negativicutes;o__Veillonellales-Selenomonadales;f__Selenomonadaceae;g__Selenomonas	0	0	0	0	0	0	0	0	0	0	0	0	0	0	0	0	0	0	0	0	0	0	0	0	0	0	0	0	0	0	0	0	0	0	0	0	0	0	0	0	0	0	0	0	0	0	0	0	0
d__Bacteria;p__Firmicutes;c__Clostridia;o__Oscillospirales;f__Ruminococcaceae;g__Negativibacillus	0	0	92	0	0	0	0	15	0	0	0	0	0	12	0	0	4	0	52	0	0	53	0	0	28	101	9	0	0	2	0	0	0	0	0	0	0	4	0	0	11	15	14	27	0	29	0	0	0
d__Bacteria;p__Verrucomicrobiota;c__Lentisphaeria;o__Victivallales;f__Victivallaceae;g__Victivallis	0	0	0	0	0	0	0	0	0	0	0	0	0	0	0	0	0	0	0	0	0	0	0	0	0	0	0	0	0	0	0	0	0	0	0	0	0	0	0	0	0	0	0	0	0	0	0	0	0
d__Bacteria;p__Firmicutes;c__Clostridia;o__Lachnospirales;f__Lachnospiraceae;g__Tyzzerella	0	0	123	0	0	0	0	30	0	0	0	206	0	0	0	7	0	23	239	139	0	0	0	0	0	0	70	0	0	14	253	0	0	0	0	224	19	0	0	0	0	0	0	0	0	0	0	45	0
d__Bacteria;p__Firmicutes;c__Clostridia;o__Lachnospirales;f__Lachnospiraceae;g__Marvinbryantia	0	0	86	41	67	81	0	0	0	0	0	0	0	42	0	0	67	0	0	0	0	145	0	62	0	39	0	0	0	0	0	0	0	0	0	0	0	0	0	0	0	26	41	17	0	0	0	0	0
d__Bacteria;p__Firmicutes;c__Clostridia;o__Lachnospirales;f__Lachnospiraceae;g__[Ruminococcus]_gnavus_group	0	0	0	0	0	0	0	0	0	34	0	0	0	0	16	0	18	8	168	969	0	0	0	0	0	0	0	0	0	12	22	0	0	0	197	0	0	0	0	327	0	0	12	0	70	140	0	374	0
d__Bacteria;p__Actinobacteriota;c__Coriobacteriia;o__Coriobacteriales;f__Eggerthellaceae;g__Paraeggerthella	0	0	0	0	0	0	0	0	0	0	0	0	0	0	0	0	0	0	0	0	0	0	0	0	0	0	0	0	0	0	0	0	0	0	0	0	0	0	0	0	0	0	0	0	0	0	0	0	0
d__Bacteria;p__Bacteroidota;c__Bacteroidia;o__Bacteroidales;f__Prevotellaceae;g__Prevotellaceae_Ga6A1_group	0	0	0	0	0	0	0	0	0	0	0	0	0	0	0	0	0	0	0	0	0	0	0	0	0	0	0	0	0	0	0	0	0	0	0	0	0	0	0	0	0	0	0	0	0	0	0	0	0
d__Bacteria;p__Actinobacteriota;c__Actinobacteria;o__Corynebacteriales;f__Corynebacteriaceae;g__Lawsonella	0	0	0	103	0	0	0	0	0	0	0	61	22	61	0	0	0	63	0	72	0	0	22	0	0	0	0	0	7	0	34	0	0	671	44	0	29	131	0	33	18	17	27	151	319	8	0	238	351
d__Bacteria;p__Actinobacteriota;c__Coriobacteriia;o__Coriobacteriales;f__Eggerthellaceae;g__Senegalimassilia	0	0	66	24	0	94	0	0	0	0	0	0	0	92	0	0	88	4	12	0	0	0	0	34	0	48	0	0	0	0	19	0	0	10	0	0	0	0	0	0	38	0	0	0	0	0	0	0	10
d__Bacteria;p__Firmicutes;c__Clostridia;o__Lachnospirales;f__Lachnospiraceae;g__Lachnospiraceae_UCG-001	0	0	0	15	0	0	0	0	28	0	0	0	0	0	0	0	0	0	0	0	0	65	0	0	0	0	0	0	0	0	0	0	0	0	0	0	0	0	0	0	0	0	0	0	0	0	0	0	0
d__Bacteria;p__Actinobacteriota;c__Actinobacteria;o__Actinomycetales;f__Actinomycetaceae;g__Actinomyces	0	403	0	0	0	0	0	0	0	0	35	58	0	107	639	81	0	48	0	107	0	0	267	36	0	0	0	45	0	0	359	971	0	29	21	0	114	3	0	233	0	55	309	522	50	53	0	23	853
d__Bacteria;p__Proteobacteria;c__Gammaproteobacteria;o__Cardiobacteriales;f__Cardiobacteriaceae;g__Cardiobacterium	0	0	0	0	0	0	0	0	0	0	0	0	0	0	0	0	0	0	0	0	0	0	0	0	0	0	0	0	0	0	0	0	0	0	0	0	0	0	0	0	0	0	0	0	0	0	0	0	0
d__Bacteria;p__Firmicutes;c__Clostridia;o__Oscillospirales;f__Oscillospiraceae;g__Oscillospira	0	0	0	0	0	0	0	7	0	0	0	0	0	0	0	0	0	0	0	0	0	0	0	0	0	0	0	0	0	0	0	0	0	0	0	0	0	0	0	0	0	0	0	0	0	0	0	0	0
d__Bacteria;p__Firmicutes;c__Clostridia;o__Christensenellales;f__Christensenellaceae;g__uncultured	0	0	0	0	0	0	0	0	0	0	0	0	0	0	0	0	0	0	0	0	0	0	0	0	0	0	0	0	0	0	0	0	0	0	0	0	0	0	0	0	0	0	0	0	0	0	0	0	0
d__Bacteria;p__Firmicutes;c__Clostridia;o__Clostridia;f__Hungateiclostridiaceae;g__Ruminiclostridium	0	0	0	0	0	0	0	0	0	0	0	0	0	0	0	0	0	0	0	0	0	0	0	0	0	0	0	0	0	0	0	0	0	0	0	0	0	0	0	0	0	0	0	0	0	0	0	0	0
d__Bacteria;p__Firmicutes;c__Clostridia;o__Lachnospirales;f__Lachnospiraceae;g__[Eubacterium]_ruminantium_group	0	0	58	21	0	271	0	143	33	0	0	0	0	0	0	0	32	0	0	0	0	71	16	190	0	23	0	0	0	0	0	0	0	0	0	0	0	0	0	0	0	0	9	0	0	0	0	0	4
d__Bacteria;p__Firmicutes;c__Clostridia;o__Peptostreptococcales-Tissierellales;f__Anaerovoracaceae;g__Family_XIII_UCG-001	0	0	34	18	0	0	0	10	0	0	0	0	0	17	0	0	10	0	0	0	0	21	0	0	0	0	0	0	0	0	0	0	0	0	0	0	0	0	0	0	0	0	13	18	0	15	0	0	0
d__Bacteria;p__Firmicutes;c__Bacilli;o__Erysipelotrichales;f__Erysipelatoclostridiaceae;g__Erysipelotrichaceae_UCG-003	0	0	0	12	0	0	0	0	0	0	0	0	0	45	0	0	0	0	16	54	0	200	10	0	0	47	12	0	8	0	49	0	0	4	0	0	0	0	0	0	0	0	71	0	87	0	0	0	0
d__Bacteria;p__Desulfobacterota;c__Desulfovibrionia;o__Desulfovibrionales;f__Desulfovibrionaceae;g__Desulfovibrio	0	0	0	33	0	17	0	0	8	0	0	0	0	0	0	0	0	0	0	0	0	0	0	0	0	0	281	0	14	0	0	0	0	0	0	0	0	7	0	0	0	11	15	0	0	0	80	0	0
d__Bacteria;p__Firmicutes;c__Bacilli;o__Lactobacillales;f__Leuconostocaceae;g__Leuconostoc	0	0	0	0	0	0	0	0	0	0	0	0	0	8	0	0	0	0	0	0	0	0	0	0	0	0	0	0	0	0	0	0	0	0	0	0	0	0	0	0	0	0	0	0	0	0	0	0	0
d__Bacteria;p__Firmicutes;c__Clostridia;o__Peptostreptococcales-Tissierellales;f__Peptostreptococcaceae;g__Romboutsia	0	0	0	159	0	0	0	1072	43	0	14	0	1582	605	57	0	93	0	0	0	0	22	0	16	0	194	0	0	103	0	51	0	0	23	39	0	0	15	0	0	176	155	571	0	22	0	537	435	1300
d__Bacteria;p__Firmicutes;c__Bacilli;o__Lactobacillales;f__Leuconostocaceae;g__Weissella	0	0	0	0	128	0	0	37	0	0	0	0	0	31	0	0	0	0	0	0	0	0	0	0	0	40	0	0	0	11	0	0	0	0	7	0	0	0	0	0	10	5	19	0	0	0	0	0	0
d__Bacteria;p__Bacteroidota;c__Bacteroidia;o__Bacteroidales;f__Marinifilaceae;g__Odoribacter	7	0	9	0	0	0	0	0	0	0	5	0	0	0	0	0	0	0	0	0	0	16	0	0	0	0	0	0	0	0	0	2	0	0	0	0	0	0	0	0	0	15	0	31	0	103	0	0	0
d__Bacteria;p__Proteobacteria;c__Gammaproteobacteria;o__Burkholderiales;f__Comamonadaceae;__unclassification	0	0	0	0	0	0	0	0	0	0	0	0	0	0	0	0	0	0	0	0	0	0	0	0	0	0	0	0	0	0	3	0	0	0	0	0	0	0	0	0	0	0	0	0	0	0	0	10	0
d__Bacteria;p__Proteobacteria;c__Gammaproteobacteria;o__Burkholderiales;f__Comamonadaceae;g__Comamonas	0	0	0	0	0	0	0	0	0	0	0	0	0	0	0	0	0	0	0	0	0	0	0	0	0	0	0	0	0	0	0	0	0	0	0	0	0	0	0	0	0	0	0	0	0	0	0	42	0
d__Bacteria;p__Firmicutes;c__Clostridia;o__Lachnospirales;f__Lachnospiraceae;g__Lachnospiraceae_FCS020_group	0	0	0	48	0	49	0	0	16	0	0	0	0	69	0	0	106	0	0	0	0	49	0	35	17	55	0	0	0	0	8	0	0	0	0	0	0	0	0	0	29	30	0	0	23	0	0	0	0
d__Bacteria;p__Firmicutes;c__Bacilli;o__Erysipelotrichales;f__Erysipelotrichaceae;g__Holdemania	0	0	0	0	0	0	0	0	0	0	0	0	0	0	0	0	0	0	0	0	0	0	0	0	0	0	0	0	0	0	0	0	0	0	0	0	0	0	0	0	0	0	0	0	0	0	0	0	0
d__Bacteria;p__Actinobacteriota;c__Actinobacteria;o__Micrococcales;f__Micrococcaceae;g__Rothia	0	0	0	0	0	0	0	0	0	9	38	0	0	37	0	0	0	0	0	11	0	0	0	0	0	0	0	41	0	0	0	0	0	0	0	0	0	0	0	519	0	0	46	0	0	0	0	40	0
d__Bacteria;p__Bacteroidota;c__Bacteroidia;o__Bacteroidales;f__Prevotellaceae;g__Prevotellaceae_NK3B31_group	0	0	0	0	0	0	0	0	0	0	0	0	0	0	0	0	157	0	30	0	0	435	0	331	0	185	0	0	24	0	0	0	0	0	0	0	0	0	0	0	0	0	45	0	0	0	0	0	0
d__Bacteria;p__Firmicutes;c__Clostridia;o__Lachnospirales;f__Lachnospiraceae;g__Lachnospiraceae_UCG-010	0	0	23	48	18	472	0	0	0	0	0	53	0	28	68	0	30	0	27	0	0	9	3	91	0	165	156	0	0	0	0	0	0	0	0	0	0	0	0	0	0	0	0	81	0	149	0	0	0
d__Bacteria;p__Firmicutes;c__Clostridia;o__Lachnospirales;f__Lachnospiraceae;g__Lachnospiraceae_UCG-003	0	0	0	0	0	0	0	0	0	0	0	0	0	0	0	0	0	0	0	0	0	0	0	0	0	0	0	0	0	0	0	0	0	0	0	0	0	0	0	0	0	0	0	0	0	0	0	0	0
d__Bacteria;p__Actinobacteriota;c__Actinobacteria;o__Bifidobacteriales;f__Bifidobacteriaceae;g__Gardnerella	0	53309	0	0	0	0	0	0	0	0	0	0	0	0	0	0	0	0	0	0	0	0	0	0	0	0	0	0	0	0	0	0	0	0	0	0	0	0	0	0	0	0	0	0	0	0	0	0	4242
d__Bacteria;p__Firmicutes;c__Clostridia;o__Lachnospirales;f__Lachnospiraceae;g__[Eubacterium]_oxidoreducens_group	0	0	0	0	0	0	0	0	0	0	0	0	0	0	0	0	2	0	0	0	0	0	0	0	0	0	0	0	0	0	0	0	0	0	0	0	0	0	0	0	0	0	0	0	0	0	0	0	0
d__Bacteria;p__Proteobacteria;c__Alphaproteobacteria;o__Rhodospirillales;f__uncultured;g__uncultured	0	0	0	0	0	0	0	0	0	0	0	20	0	0	0	0	0	0	0	0	0	520	0	0	0	0	0	0	0	0	0	0	0	0	0	0	0	0	0	0	0	0	0	0	0	0	0	0	0
d__Bacteria;p__Firmicutes;c__Negativicutes;o__Veillonellales-Selenomonadales;f__Selenomonadaceae;g__Mitsuokella	0	0	0	0	0	0	0	0	0	0	0	0	0	184	0	0	0	0	0	27	0	0	0	0	0	0	0	0	9	0	0	0	0	0	0	0	0	126	0	0	76	2	30	0	0	0	0	0	0
d__Bacteria;p__Firmicutes;c__Bacilli;o__Lactobacillales;f__Enterococcaceae;g__Enterococcus	273	697	0	0	0	329	49513	16	0	0	6297	0	182	8	0	0	0	5979	0	0	0	0	0	0	36	0	0	7085	40	17916	0	0	18613	324	56	0	480	0	9883	1041	4	14	201	0	12	0	0	232	2916
d__Bacteria;p__Firmicutes;c__Bacilli;o__Bacillales;f__Bacillaceae;g__Calditerricola	0	0	0	0	0	0	0	0	0	0	0	0	0	0	0	0	0	0	0	0	0	20	0	0	0	0	0	0	0	0	0	0	0	0	0	0	0	0	0	0	0	0	0	0	0	0	0	0	0
d__Bacteria;p__Firmicutes;c__Clostridia;o__Lachnospirales;f__Lachnospiraceae;g__[Eubacterium]_hallii_group	0	0	76	64	62	210	0	402	114	0	0	0	0	195	53	0	342	0	26	0	0	570	16	66	122	193	185	0	75	0	31	17	0	0	0	0	0	26	0	0	134	141	48	0	284	8	45	0	0
d__Bacteria;p__Actinobacteriota;c__Actinobacteria;o__Propionibacteriales;f__Nocardioidaceae;g__Nocardioides	0	0	0	0	0	0	0	0	0	0	0	0	0	0	0	0	0	0	0	0	0	0	0	0	0	0	0	0	0	0	0	0	0	0	0	0	0	0	0	0	0	0	0	0	0	0	0	0	0
d__Bacteria;p__Firmicutes;c__Clostridia;o__Oscillospirales;f__Oscillospiraceae;g__Flavonifractor	0	0	0	0	0	0	0	0	0	0	0	0	0	0	0	0	0	0	0	0	0	0	0	0	0	0	0	0	0	0	0	0	0	0	0	0	0	0	0	0	0	0	0	0	11	0	0	37	0
d__Bacteria;p__Firmicutes;c__Clostridia;o__Lachnospirales;f__Lachnospiraceae;g__Eisenbergiella	0	0	0	0	0	0	0	0	0	0	0	51	0	0	0	0	0	0	0	0	0	0	0	0	0	0	13	0	0	0	0	0	0	0	0	0	0	0	0	0	0	0	0	94	0	20	0	29	0
d__Bacteria;p__Bacteroidota;c__Bacteroidia;o__Bacteroidales;f__Tannerellaceae;g__Tannerellaceae	0	0	0	0	0	0	0	0	0	0	0	0	0	0	0	0	0	0	0	0	0	0	0	0	0	0	0	0	0	0	0	0	0	0	0	0	0	0	0	0	0	0	2	0	0	0	0	0	0
d__Bacteria;p__Firmicutes;c__Clostridia;o__Oscillospirales;f__uncultured;g__uncultured	0	0	0	0	0	0	0	0	0	0	0	0	0	0	0	0	0	0	0	0	0	0	0	0	0	0	0	0	0	0	0	0	0	0	0	0	0	0	0	0	0	0	0	0	0	0	0	0	0
d__Bacteria;p__Firmicutes;c__Bacilli;o__Erysipelotrichales;f__Erysipelatoclostridiaceae;g__Erysipelatoclostridiaceae	0	0	0	0	0	0	0	0	0	0	0	0	0	0	0	0	0	0	0	0	0	0	0	0	0	0	0	0	0	0	0	0	0	0	0	0	0	0	0	0	0	0	0	0	0	0	0	0	0
d__Bacteria;p__Firmicutes;c__Negativicutes;o__Acidaminococcales;f__Acidaminococcaceae;g__Acidaminococcus	0	0	0	0	0	0	0	0	0	0	0	0	0	82	0	0	29	0	0	2	0	11	0	0	0	0	0	0	0	0	0	83	0	0	0	0	0	0	0	0	0	0	0	0	0	0	0	0	0
d__Bacteria;p__Firmicutes;c__Clostridia;o__Lachnospirales;f__Lachnospiraceae;g__Sellimonas	0	0	0	0	0	0	0	45	0	0	0	0	0	0	21	0	0	0	0	0	0	0	0	0	0	0	0	0	0	0	0	0	0	0	0	0	0	0	0	0	0	14	0	0	0	0	0	0	0
d__Bacteria;p__Bacteroidota;c__Bacteroidia;o__Bacteroidales;f__Prevotellaceae;__unclassification	0	0	0	0	0	0	0	0	0	0	0	55	0	8	0	0	0	0	0	0	0	0	0	0	0	0	0	0	0	0	0	0	0	0	0	0	0	0	0	0	0	0	0	0	0	0	0	0	0
d__Bacteria;p__Firmicutes;c__Clostridia;o__Lachnospirales;f__Lachnospiraceae;g__Tuzzerella	0	0	0	0	0	0	0	0	0	0	0	0	0	0	0	0	0	0	0	0	0	0	0	0	0	0	0	0	0	0	0	0	0	0	0	0	0	0	0	0	0	0	0	0	0	0	0	0	0
d__Bacteria;p__Actinobacteriota;c__Coriobacteriia;o__Coriobacteriales;f__Coriobacteriales_Incertae_Sedis;g__uncultured	0	0	0	0	0	0	0	0	0	0	0	0	0	21	0	0	0	0	0	0	0	15	0	0	0	0	0	0	0	0	0	0	0	0	0	0	0	0	0	0	0	0	0	0	0	0	0	0	0
d__Bacteria;p__Firmicutes;c__Clostridia;o__Lachnospirales;f__Lachnospiraceae;g__GCA-900066755	0	0	0	0	0	0	0	0	0	0	0	0	0	0	0	0	0	0	0	0	0	0	0	0	0	0	0	0	0	0	0	0	0	0	0	0	0	0	0	0	0	0	0	10	0	0	0	0	0
d__Bacteria;p__Firmicutes;c__Clostridia;o__Eubacteriales;f__Anaerofustaceae;g__Anaerofustis	0	0	0	0	0	0	0	0	0	0	0	0	0	0	0	0	0	0	0	0	0	0	0	0	0	0	0	0	0	0	0	0	0	0	0	0	0	0	0	0	0	0	0	0	0	0	0	0	0
d__Bacteria;p__Firmicutes;c__Bacilli;o__Lactobacillales;f__Carnobacteriaceae;g__Atopostipes	0	0	0	0	0	0	0	0	0	0	0	0	0	0	0	0	0	0	0	0	0	0	0	0	0	0	0	0	0	0	0	0	0	0	0	0	0	0	0	0	0	0	0	0	0	0	0	11	0
d__Bacteria;p__Firmicutes;c__Clostridia;o__Peptostreptococcales-Tissierellales;f__Peptostreptococcales-Tissierellales;g__Parvimonas	0	0	0	35	306	0	0	11	0	18	0	1461	0	0	0	79	18	0	19	701	0	11	0	0	0	127	353	0	222	0	33	0	0	0	0	0	363	0	0	0	0	0	158	80	0	409	0	0	15
d__Bacteria;p__Proteobacteria;c__Gammaproteobacteria;o__Burkholderiales;f__Neisseriaceae;g__Neisseria	0	0	0	0	0	0	0	0	0	0	0	0	0	0	0	0	0	0	0	0	0	0	0	0	0	0	0	0	0	0	0	0	0	0	5	0	0	0	0	281	0	0	15	0	0	0	0	0	0
d__Bacteria;p__Proteobacteria;c__Gammaproteobacteria;o__Enterobacterales;f__Morganellaceae;g__Morganella	0	0	0	0	0	0	0	0	0	0	0	0	0	0	0	0	0	6	0	0	0	0	0	0	0	0	0	324	0	0	0	0	0	0	0	0	0	0	0	0	0	0	0	0	0	0	0	0	0
d__Bacteria;p__Firmicutes;c__Bacilli;o__Erysipelotrichales;f__Erysipelotrichaceae;g__Erysipelotrichaceae	0	0	0	0	0	0	0	0	0	0	0	0	0	0	0	0	0	0	0	0	0	0	0	0	0	0	0	0	0	0	0	0	0	0	0	0	0	0	0	0	0	0	0	0	0	0	0	0	0
d__Bacteria;p__Actinobacteriota;c__Actinobacteria;o__Propionibacteriales;f__Propionibacteriaceae;g__Cutibacterium	0	8	0	0	12	13	21	0	0	20	181	0	639	0	0	16	0	12	0	47	50	0	13	0	0	0	5	188	0	22	0	41	34	153	60	0	45	306	0	42	38	0	33	0	15	67	19	628	0
d__Bacteria;p__Firmicutes;c__Clostridia;o__Lachnospirales;f__Lachnospiraceae;g__[Eubacterium]_xylanophilum_group	0	0	0	0	0	16	0	20	0	0	0	0	0	0	0	0	0	0	9	0	0	28	0	0	0	0	0	0	0	0	0	0	0	0	0	0	0	0	0	0	0	0	0	0	0	0	0	0	0
d__Bacteria;p__Actinobacteriota;c__Coriobacteriia;o__Coriobacteriales;f__Eggerthellaceae;g__Eggerthella	50	0	0	0	0	0	0	0	0	0	60	8	0	0	0	0	0	0	0	124	0	37	0	0	0	0	0	0	0	0	0	0	0	6	35	0	0	0	0	0	0	0	12	23	51	14	0	39	0
d__Bacteria;p__Actinobacteriota;c__Coriobacteriia;o__Coriobacteriales;f__Eggerthellaceae;g__Slackia	0	0	0	28	105	161	0	0	0	0	0	0	0	0	16	94	0	0	0	0	0	0	0	0	0	0	0	0	0	0	0	20	0	0	0	0	84	22	0	0	0	0	151	0	0	37	0	0	0
d__Bacteria;p__Firmicutes;c__Clostridia;o__Lachnospirales;f__Lachnospiraceae;g__Howardella	0	0	20	0	27	0	0	0	0	0	0	0	0	8	0	25	0	0	0	39	0	0	0	21	0	21	0	0	0	0	24	0	0	0	0	0	0	18	0	0	0	0	31	0	0	0	0	0	0
d__Bacteria;p__Proteobacteria;c__Gammaproteobacteria;o__Pasteurellales;f__Pasteurellaceae;__unclassification	0	0	0	0	0	0	0	0	0	0	0	0	0	0	0	0	0	0	0	0	0	0	0	0	0	0	0	0	0	0	2	0	0	0	0	0	0	0	0	0	0	0	0	0	0	0	0	0	11
d__Bacteria;p__Spirochaetota;c__Brevinematia;o__Brevinematales;f__Brevinemataceae;g__Brevinema	0	0	0	0	0	0	0	0	0	0	0	0	0	0	0	0	0	0	0	0	0	0	0	0	0	0	0	0	0	0	0	0	0	0	0	0	0	0	0	0	0	0	0	0	0	0	0	0	0
d__Bacteria;p__Firmicutes;c__Clostridia;o__Oscillospirales;f__Ruminococcaceae;g__CAG-352	0	0	0	0	0	0	0	0	16	0	0	0	0	0	0	0	0	0	0	0	0	0	9	0	0	1460	9	0	0	0	0	0	0	0	0	0	0	0	0	0	0	0	200	0	0	0	0	0	0
d__Bacteria;p__Proteobacteria;c__Gammaproteobacteria;o__Enterobacterales;f__Pectobacteriaceae;g__Lonsdalea	0	0	0	0	0	0	0	0	0	0	0	0	0	0	0	0	0	0	0	0	0	0	0	0	0	0	0	0	0	0	0	0	0	0	0	0	0	0	0	0	0	0	0	0	0	0	0	0	0
d__Bacteria;p__Actinobacteriota;c__Actinobacteria;o__Actinomycetales;f__Actinomycetaceae;g__Mobiluncus	0	0	0	0	70	0	0	0	0	0	0	0	0	1945	0	0	0	0	0	0	0	545	19	0	0	43	0	0	0	0	0	0	0	0	0	0	0	166	0	24	0	68	645	0	0	0	0	0	1412
d__Bacteria;p__Firmicutes;c__Clostridia;o__Oscillospirales;f__Ruminococcaceae;g__DTU089	0	0	0	0	0	0	0	0	0	0	0	0	0	0	0	0	0	0	0	0	0	0	0	0	0	0	0	0	0	0	0	0	0	0	0	0	0	0	0	0	0	0	0	0	0	0	0	0	0
d__Bacteria;p__Firmicutes;c__Clostridia;o__Oscillospirales;f__Ruminococcaceae;g__Anaerofilum	0	0	0	0	0	0	0	0	0	0	0	0	0	0	0	0	0	0	0	0	0	0	0	0	0	0	0	0	0	0	0	0	0	0	0	0	0	0	0	0	0	0	0	0	0	0	0	0	0
d__Bacteria;p__Fusobacteriota;c__Fusobacteriia;o__Fusobacteriales;f__Leptotrichiaceae;g__Leptotrichia	0	0	0	0	0	0	0	0	0	0	0	17	0	0	0	0	0	0	0	0	0	0	0	0	0	0	0	0	0	0	0	0	0	0	0	0	0	0	0	0	0	0	0	0	0	0	0	0	0
d__Bacteria;p__Firmicutes;c__Negativicutes;o__Veillonellales-Selenomonadales;f__Veillonellaceae;g__Negativicoccus	0	0	0	81	0	0	0	0	0	0	0	0	0	0	15	48	0	10	0	0	5	0	10	0	0	0	0	0	0	12	107	0	0	12	79	0	0	86	8	260	13	0	24	89	243	0	0	0	0
d__Bacteria;p__Proteobacteria;c__Gammaproteobacteria;o__Enterobacterales;f__Enterobacteriaceae;g__Enterobacteriaceae	0	0	0	0	0	0	0	0	0	0	0	0	0	0	0	0	0	0	0	0	0	0	0	0	0	0	0	0	0	0	0	0	0	0	0	0	0	0	0	0	0	0	0	0	0	0	0	0	0
d__Bacteria;p__Actinobacteriota;c__Coriobacteriia;o__Coriobacteriales;f__Eggerthellaceae;g__Gordonibacter	0	0	0	0	0	0	0	0	0	0	0	0	0	0	0	0	0	0	0	0	0	7	0	0	0	0	0	0	0	0	0	0	0	0	0	0	0	0	0	0	0	0	0	0	0	0	0	0	0
d__Bacteria;p__Proteobacteria;c__Gammaproteobacteria;o__Enterobacterales;__unclassification;__unclassification	0	0	0	0	0	0	0	0	0	0	0	0	0	0	0	0	0	0	0	0	0	0	0	0	0	0	0	0	0	0	0	0	0	0	8	0	0	0	0	0	0	0	0	0	2	0	0	0	0
d__Bacteria;p__Firmicutes;c__Bacilli;o__Erysipelotrichales;f__Erysipelatoclostridiaceae;g__Erysipelatoclostridium	0	0	0	6	0	0	0	0	0	0	0	9	0	0	0	0	0	0	0	0	0	0	0	0	0	0	0	0	0	0	0	0	0	0	0	51	0	0	0	0	0	0	0	6	4	7	0	0	0
d__Bacteria;p__Desulfobacterota;c__Desulfovibrionia;o__Desulfovibrionales;f__Desulfovibrionaceae;g__Bilophila	17	0	0	0	18	54	0	15	10	0	0	8	0	40	23	0	0	0	0	0	0	51	0	0	0	43	43	0	11	0	0	0	0	6	0	0	0	0	0	15	0	31	27	31	0	23	0	0	0
d__Bacteria;p__Actinobacteriota;c__Actinobacteria;o__Micrococcales;f__Dermabacteraceae;g__Dermabacter	0	0	0	0	0	0	0	0	0	0	0	0	0	0	0	0	0	0	0	0	23	0	66	0	0	0	0	0	0	0	0	0	0	0	0	0	40	0	0	33	0	11	0	0	0	0	0	0	0
d__Bacteria;p__Proteobacteria;c__Alphaproteobacteria;o__Rhizobiales;f__Xanthobacteraceae;g__Rhodopseudomonas	0	0	0	0	0	0	0	0	0	0	0	0	0	0	0	0	0	0	0	0	0	0	0	0	0	0	0	20	0	0	0	0	0	0	0	0	0	17	0	0	0	0	0	0	0	0	0	0	0
d__Bacteria;p__Bacteroidota;c__Bacteroidia;o__Bacteroidales;f__Rikenellaceae;g__Rikenella	0	0	0	0	0	0	0	0	0	0	0	0	0	0	0	0	0	0	0	0	0	0	0	0	0	0	0	0	0	0	0	0	0	0	0	0	0	0	0	0	0	0	0	0	0	0	0	0	0
d__Bacteria;p__Firmicutes;c__Clostridia;o__Eubacteriales;f__Eubacteriaceae;g__Eubacterium	0	0	0	0	0	0	0	22	0	0	0	0	0	0	0	0	0	0	0	0	0	0	0	0	0	0	0	0	0	0	0	0	0	0	0	0	0	0	0	0	0	9	0	25	0	11	0	0	0
d__Bacteria;p__Proteobacteria;c__Alphaproteobacteria;o__Rhizobiales;f__Beijerinckiaceae;g__Methylobacterium-Methylorubrum	0	0	0	0	0	0	0	0	0	0	0	0	0	0	0	0	0	0	0	0	0	0	0	0	0	0	0	0	0	0	0	0	0	0	0	0	0	0	0	0	0	0	0	0	0	0	0	1156	0
d__Bacteria;p__Firmicutes;c__Clostridia;o__Lachnospirales;f__Lachnospiraceae;g__Lachnospiraceae_UCG-007	0	0	0	0	0	0	0	0	0	0	0	0	0	0	0	0	0	0	0	0	0	0	0	0	0	0	0	0	0	0	0	0	0	0	0	0	0	0	0	0	0	0	0	0	0	0	0	0	0
d__Bacteria;p__Firmicutes;c__Clostridia;o__Lachnospirales;f__Lachnospiraceae;g__Stomatobaculum	0	0	0	0	0	0	0	0	0	0	0	0	0	0	0	0	0	0	0	0	0	0	0	0	0	0	0	0	0	0	0	0	0	0	0	0	0	0	0	0	0	0	0	0	0	0	0	0	0
d__Bacteria;p__Actinobacteriota;c__Coriobacteriia;o__Coriobacteriales;f__uncultured;g__uncultured	0	0	0	0	0	0	0	0	0	0	0	0	0	36	0	0	0	0	0	0	0	0	0	0	0	0	0	0	0	0	0	0	0	20	0	0	0	23	0	0	0	18	10	0	0	0	0	0	4
d__Bacteria;p__Proteobacteria;c__Gammaproteobacteria;o__Enterobacterales;f__Erwiniaceae;g__Pantoea	0	0	0	0	0	0	0	0	0	0	0	0	0	0	0	0	0	0	0	0	0	0	0	0	0	0	0	0	0	0	0	0	0	0	0	0	0	0	0	0	0	0	0	0	0	0	0	0	0
d__Bacteria;p__Proteobacteria;c__Gammaproteobacteria;o__Burkholderiales;f__Neisseriaceae;__unclassification	0	0	0	0	0	0	0	0	0	0	0	0	0	0	0	0	0	0	0	0	0	0	0	0	0	0	0	0	0	0	0	0	0	0	0	0	0	0	0	0	0	0	0	0	0	0	0	0	0
d__Bacteria;p__Proteobacteria;c__Gammaproteobacteria;o__Burkholderiales;f__Burkholderiaceae;g__Lautropia	0	0	0	0	0	0	0	0	0	0	0	0	0	0	0	0	0	0	0	0	0	0	0	0	0	0	0	0	0	0	0	0	0	0	0	0	0	0	0	0	0	0	0	0	0	0	0	0	0
d__Bacteria;p__Patescibacteria;c__Saccharimonadia;o__Saccharimonadales;f__Saccharimonadales;g__Saccharimonadales	0	0	0	0	0	0	0	0	0	0	0	0	0	0	0	0	0	0	0	0	0	0	0	0	0	0	0	0	0	0	0	0	0	0	0	0	0	0	0	0	0	0	0	0	0	0	0	0	35
d__Bacteria;p__Actinobacteriota;c__Actinobacteria;o__Propionibacteriales;f__Propionibacteriaceae;g__Tessaracoccus	0	0	0	0	0	0	0	0	0	0	0	0	0	0	0	0	0	0	0	0	0	0	0	0	0	0	0	0	0	0	0	0	0	0	0	0	0	0	0	0	0	23	0	0	0	0	0	0	0
d__Bacteria;p__Firmicutes;c__Clostridia;o__Lachnospirales;f__Lachnospiraceae;g__GCA-900066575	0	0	14	0	0	28	0	0	0	0	0	0	0	0	0	0	0	0	0	0	0	0	0	0	0	0	0	0	0	0	0	0	0	0	0	0	0	0	0	0	0	0	4	0	0	0	0	0	0
d__Bacteria;p__Proteobacteria;c__Gammaproteobacteria;o__Legionellales;f__Legionellaceae;g__uncultured	0	0	0	0	0	0	0	0	0	0	0	0	0	0	0	0	0	0	0	0	0	0	0	0	0	0	0	0	0	0	0	0	0	0	0	0	0	0	0	0	0	0	0	0	0	0	0	0	0
d__Bacteria;p__Firmicutes;c__Bacilli;o__Izemoplasmatales;f__Izemoplasmatales;g__Izemoplasmatales	0	0	0	0	0	0	0	0	4	0	0	0	0	0	0	0	0	0	0	0	0	0	0	0	0	0	0	0	0	0	0	0	0	0	0	0	0	0	0	0	0	0	0	0	0	0	0	0	0
d__Bacteria;p__Firmicutes;c__Bacilli;o__Lactobacillales;__unclassification;__unclassification	0	0	0	0	0	0	0	0	0	0	0	0	0	0	0	0	0	0	0	0	0	0	0	0	0	0	0	4	0	0	1232	0	3	0	0	0	0	0	0	0	0	0	0	0	0	0	0	0	0
d__Bacteria;p__Firmicutes;c__Bacilli;o__Bacillales;f__Bacillaceae;g__Anaerobacillus	0	0	0	0	0	0	0	0	0	0	0	0	0	0	0	0	0	0	0	0	0	0	0	0	0	0	0	0	0	0	0	0	0	0	0	0	0	0	0	0	0	0	0	0	0	0	0	0	0
d__Bacteria;p__Firmicutes;c__Bacilli;o__Erysipelotrichales;f__Erysipelotrichaceae;g__Faecalicoccus	0	0	0	0	0	0	0	0	0	0	0	0	0	0	0	0	0	0	0	0	0	0	0	0	0	0	0	0	0	0	0	0	0	0	0	0	0	0	0	0	0	11	0	0	0	0	0	0	0
d__Bacteria;p__Firmicutes;c__Negativicutes;o__Acidaminococcales;f__Acidaminococcaceae;g__Succiniclasticum	0	0	0	0	0	0	0	0	0	0	0	0	0	0	0	0	0	0	0	0	0	0	0	0	0	0	0	0	0	0	0	0	0	0	0	0	0	0	0	0	0	0	0	0	0	0	0	0	0
d__Bacteria;p__Actinobacteriota;c__Coriobacteriia;o__Coriobacteriales;f__Eggerthellaceae;g__Enterorhabdus	0	0	0	0	0	0	0	13	0	0	0	0	0	0	0	0	0	0	0	0	0	0	0	0	0	0	0	0	0	0	0	0	0	0	0	0	0	0	0	0	0	0	0	0	0	0	0	0	0
d__Bacteria;p__Proteobacteria;c__Gammaproteobacteria;o__Burkholderiales;f__Neisseriaceae;g__Eikenella	0	0	0	0	0	0	0	0	0	0	0	0	0	0	0	0	0	0	0	0	0	0	0	0	0	0	0	0	0	0	0	0	0	0	0	0	0	0	0	0	0	0	0	0	0	0	0	0	0
d__Bacteria;p__Bacteroidota;c__Bacteroidia;o__Bacteroidales;f__Marinifilaceae;__unclassification	0	0	0	0	0	0	0	0	0	0	0	0	0	0	0	0	0	0	0	0	0	0	0	0	0	0	0	0	0	0	0	0	0	0	0	0	0	0	0	0	0	0	0	0	0	0	0	0	0
d__Bacteria;p__Proteobacteria;c__Alphaproteobacteria;o__Sphingomonadales;f__Sphingomonadaceae;g__Sphingomonas	0	0	0	0	0	0	0	0	0	0	0	0	672	0	0	0	0	0	0	0	0	0	0	0	0	0	0	0	0	0	0	0	0	0	0	0	0	0	0	0	0	0	0	0	0	0	0	44	0
d__Bacteria;p__Firmicutes;c__Bacilli;o__Erysipelotrichales;f__Erysipelatoclostridiaceae;g__Coprobacillus	0	0	0	0	0	0	0	0	0	0	0	0	0	0	0	0	0	0	0	0	0	0	0	0	0	0	0	0	0	0	0	0	0	0	0	0	0	0	0	0	0	0	0	0	0	0	0	0	0
d__Bacteria;p__Bacteroidota;c__Bacteroidia;o__Bacteroidales;f__Rikenellaceae;__unclassification	0	0	0	0	0	0	0	0	0	0	0	0	0	0	0	0	0	0	0	0	0	0	0	0	0	0	0	0	0	0	0	0	0	0	0	0	0	0	0	0	0	0	0	0	0	0	0	0	0
d__Bacteria;p__Verrucomicrobiota;c__Verrucomicrobiae;o__Verrucomicrobiales;f__Akkermansiaceae;g__Akkermansia	0	0	0	0	0	0	0	0	0	0	0	1478	123	0	0	0	0	0	0	0	0	0	0	0	12	0	173	0	0	0	0	0	0	91	0	0	0	0	0	151	0	45	0	245	0	0	0	0	0
d__Bacteria;p__Firmicutes;c__Clostridia;o__Oscillospirales;f__Oscillospiraceae;g__Oscillospiraceae	0	0	0	0	0	0	0	0	0	0	0	0	0	0	0	0	0	0	0	0	0	0	0	0	0	0	0	0	0	0	0	0	0	0	0	0	0	0	0	0	0	0	0	0	0	0	0	0	0
d__Bacteria;p__Verrucomicrobiota;c__Verrucomicrobiae;o__Opitutales;f__Puniceicoccaceae;g__uncultured	0	0	0	0	0	0	0	0	0	0	0	0	0	0	0	0	0	0	0	0	0	0	0	0	0	0	0	0	0	0	0	0	0	0	0	0	0	0	0	0	0	0	0	0	0	0	0	0	0
d__Bacteria;p__Bacteroidota;c__Bacteroidia;o__Flavobacteriales;f__Weeksellaceae;g__Empedobacter	0	0	0	0	0	0	0	0	0	0	0	0	0	0	0	0	0	8	0	0	0	0	0	0	0	0	0	0	0	0	0	0	0	0	5	0	0	0	0	0	0	0	0	0	0	0	0	0	0
d__Bacteria;p__Firmicutes;c__Bacilli;o__Lactobacillales;f__Carnobacteriaceae;g__Granulicatella	0	93	0	0	0	0	158	0	0	0	0	0	0	0	0	0	0	0	0	95	0	0	0	0	0	0	0	0	0	0	30	0	417	0	0	0	18	0	0	67	0	11	20	0	0	12	0	0	0
d__Bacteria;p__Bacteroidota;c__Bacteroidia;o__Bacteroidales;f__Marinifilaceae;g__Sanguibacteroides	0	0	0	0	0	0	0	0	0	0	0	0	0	0	0	0	0	0	0	0	0	0	0	0	0	0	0	0	0	0	0	0	0	0	0	0	0	0	0	0	0	0	0	0	0	0	0	0	0
d__Bacteria;p__Actinobacteriota;c__Actinobacteria;o__Micrococcales;f__Microbacteriaceae;g__Microbacterium	0	0	0	0	0	0	0	0	0	0	0	0	0	0	0	0	0	0	0	0	0	0	14	0	0	0	0	0	0	0	0	0	0	0	0	0	0	0	0	0	0	0	0	0	11	0	0	0	0
d__Bacteria;p__Firmicutes;c__Clostridia;o__Lachnospirales;f__Lachnospiraceae;g__Shuttleworthia	0	0	0	0	0	0	0	0	0	0	0	0	0	5	0	0	0	0	0	0	0	0	0	0	0	0	0	0	0	0	0	0	0	0	0	0	0	0	0	0	13	0	0	0	0	0	305	0	0
d__Bacteria;p__Firmicutes;c__Bacilli;o__Staphylococcales;f__Staphylococcaceae;g__Staphylococcus	0	592	0	7	22	20	0	44	0	0	20	0	202	65	8	0	0	0	0	71	714	6	129	15	0	0	0	30	0	0	522	19	15	3234	25	0	0	114	0	560	0	0	385	9	42	32	0	374	0
d__Bacteria;p__Firmicutes;c__Clostridia;o__Oscillospirales;f__Butyricicoccaceae;g__uncultured	0	0	0	0	0	0	0	0	0	0	0	0	0	0	0	0	0	0	0	0	0	0	0	0	0	0	0	0	0	0	0	0	0	0	0	0	0	0	0	0	0	0	2	0	0	0	0	0	0
d__Bacteria;p__Proteobacteria;c__Gammaproteobacteria;o__Burkholderiales;f__Comamonadaceae;g__Hydrogenophaga	0	0	0	0	0	0	0	0	0	0	0	0	0	0	0	0	0	9	0	0	0	0	13	0	0	0	0	0	0	0	0	0	9	0	2	0	0	0	0	0	0	0	0	0	0	0	0	0	0
d__Bacteria;p__Actinobacteriota;c__Coriobacteriia;o__Coriobacteriales;f__Coriobacteriaceae;g__Collinsella	0	0	0	223	295	99	0	417	0	0	0	0	0	860	938	0	1827	0	0	107	0	1210	62	203	109	201	100	0	301	0	351	146	0	36	0	0	0	195	0	0	743	348	490	97	0	219	0	0	8
d__Bacteria;p__Proteobacteria;c__Gammaproteobacteria;o__Pseudomonadales;f__Pseudomonadaceae;g__Pseudomonas	0	15	6	0	223	192	0	0	0	0	12	0	14	153	0	0	6	532	0	0	397	116	869	0	0	0	24	114	0	99	113	0	234	1237	352	0	0	1875	5	1669	0	37	3284	18	199	8147	0	30	30
d__Bacteria;p__Synergistota;c__Synergistia;o__Synergistales;f__Synergistaceae;g__Synergistes	0	0	0	0	0	0	0	0	0	0	0	0	0	0	0	0	0	0	0	0	0	0	0	0	0	0	0	0	0	0	0	0	0	0	0	0	0	0	0	0	0	0	0	0	0	0	0	0	0
d__Bacteria;p__Firmicutes;c__Bacilli;o__Erysipelotrichales;f__Erysipelatoclostridiaceae;g__Asteroleplasma	0	0	0	0	0	0	0	0	0	0	0	0	0	0	0	0	0	0	0	0	0	0	0	0	0	0	0	0	0	0	0	0	0	0	0	0	0	0	0	0	0	0	0	0	0	0	0	0	0
d__Bacteria;p__Firmicutes;c__Incertae_Sedis;o__DTU014;f__DTU014;g__DTU014	0	0	0	0	0	0	0	0	0	0	0	0	0	0	0	0	0	0	0	0	0	0	0	0	0	0	0	0	0	0	0	0	0	0	0	0	0	0	0	0	0	0	0	0	0	0	0	0	0
d__Bacteria;p__Actinobacteriota;c__Actinobacteria;o__Micrococcales;f__Brevibacteriaceae;g__Brevibacterium	0	0	0	0	0	0	0	0	0	0	0	0	0	0	0	0	0	0	0	0	0	0	0	0	0	0	0	0	0	0	0	0	0	0	0	0	0	0	0	0	0	1645	0	0	0	0	0	0	0
d__Bacteria;p__Firmicutes;c__Clostridia;o__Peptostreptococcales-Tissierellales;f__Peptostreptococcales-Tissierellales;g__W5053	0	0	0	0	0	0	0	0	0	0	0	0	0	6	20	0	0	0	37	0	0	0	0	65	0	0	0	0	0	0	55	0	0	0	0	0	0	22	0	0	87	19	0	0	0	0	0	0	0
d__Bacteria;p__Firmicutes;c__Bacilli;o__Erysipelotrichales;f__Erysipelotrichaceae;g__Turicibacter	0	0	0	0	0	0	0	0	0	0	0	0	0	0	0	0	0	0	0	0	0	0	0	0	0	0	0	0	0	0	0	0	0	0	0	0	0	0	0	0	0	14	47	0	0	0	721	2	94
d__Bacteria;p__Firmicutes;c__Clostridia;o__Oscillospirales;f__Ruminococcaceae;g__Anaerotruncus	0	0	0	0	0	0	0	0	0	0	0	0	0	0	0	0	0	0	0	0	0	0	0	0	0	0	0	0	0	0	0	0	0	0	0	0	0	0	0	0	0	0	0	0	0	17	0	0	0
d__Bacteria;p__Proteobacteria;c__Gammaproteobacteria;o__Aeromonadales;f__Succinivibrionaceae;g__Succinatimonas	0	0	0	0	0	0	0	0	0	0	0	0	0	0	0	0	0	0	0	0	0	0	0	0	0	0	0	0	0	0	0	0	0	0	0	0	0	0	0	0	0	0	0	0	0	0	0	0	0
d__Bacteria;p__Firmicutes;c__Clostridia;o__Peptostreptococcales-Tissierellales;f__Peptostreptococcaceae;g__Filifactor	0	0	0	0	0	0	0	0	0	0	0	343	0	0	0	0	0	0	0	0	0	0	0	0	0	0	0	0	0	0	0	0	0	0	0	0	0	0	0	0	0	0	0	0	0	0	0	0	0
d__Bacteria;p__Synergistota;c__Synergistia;o__Synergistales;f__Synergistaceae;g__Jonquetella	0	0	0	0	0	0	0	0	0	0	0	0	0	0	0	0	0	0	0	0	0	0	0	0	0	0	0	0	0	0	0	0	0	0	0	0	0	0	0	0	0	0	0	0	0	0	0	0	0
d__Bacteria;p__Desulfobacterota;c__Desulfovibrionia;o__Desulfovibrionales;f__Desulfovibrionaceae;g__uncultured	0	0	0	0	0	0	0	0	0	0	0	0	0	0	0	0	3	0	0	0	0	0	0	0	0	0	0	0	0	0	0	0	0	0	0	0	0	0	0	0	0	0	0	0	0	0	0	0	0
d__Bacteria;p__Synergistota;c__Synergistia;o__Synergistales;f__Synergistaceae;g__Pyramidobacter	0	0	0	0	0	0	0	0	0	0	0	0	0	19	0	0	0	0	0	0	0	2	0	0	0	0	0	0	0	0	0	0	0	0	0	0	0	10	0	0	0	7	0	0	0	0	0	0	9
d__Bacteria;p__Firmicutes;c__Clostridia;o__Lachnospirales;f__Lachnospiraceae;g__Fusicatenibacter	0	0	0	43	0	132	0	101	321	0	0	0	0	243	90	0	63	0	0	0	0	397	17	30	164	639	59	0	57	0	405	0	0	0	1699	0	0	0	0	0	366	0	122	0	487	0	0	181	7
d__Bacteria;p__Synergistota;c__Synergistia;o__Synergistales;f__Synergistaceae;g__Cloacibacillus	13	0	0	0	0	0	0	0	0	0	0	0	0	0	0	0	0	0	0	0	0	0	0	0	0	0	9	0	0	0	0	0	0	0	0	0	0	0	0	0	0	46	0	51	0	0	0	0	0
d__Bacteria;p__Bacteroidota;c__Bacteroidia;o__Bacteroidales;f__uncultured;g__uncultured	0	0	0	8	0	0	0	0	0	0	0	0	0	0	0	0	15	0	0	0	0	0	0	0	0	0	0	0	0	0	0	0	0	0	0	0	0	0	0	0	0	8	0	0	0	0	0	0	0
d__Bacteria;p__Proteobacteria;c__Gammaproteobacteria;o__Enterobacterales;f__Enterobacteriaceae;g__Citrobacter	131	0	0	0	0	0	0	0	0	0	0	0	0	0	0	0	0	0	0	0	0	0	0	0	0	0	0	0	0	0	0	0	0	0	0	0	0	0	0	28	0	0	0	0	0	0	0	0	229
d__Bacteria;p__Patescibacteria;c__ABY1;o__Candidatus_Magasanikbacteria;f__Candidatus_Magasanikbacteria;g__Candidatus_Magasanikbacteria	0	0	0	0	0	0	0	0	0	0	0	0	0	0	0	0	0	0	0	0	0	0	0	0	0	0	0	0	0	0	0	0	0	0	0	0	0	0	0	0	0	0	0	0	0	0	0	7	0
d__Bacteria;p__Firmicutes;c__Clostridia;o__Oscillospirales;f__Ruminococcaceae;g__UBA1819	0	0	0	0	0	0	0	0	0	0	7	28	0	29	0	0	0	0	0	0	0	0	0	0	0	0	0	0	0	0	0	0	0	0	0	0	0	0	0	0	0	0	0	6	0	10	0	0	15
d__Bacteria;p__Firmicutes;c__Clostridia;o__Oscillospirales;f__Oscillospiraceae;g__UCG-007	0	0	0	0	0	0	0	0	0	0	0	0	0	0	0	0	0	0	0	0	0	0	0	0	0	0	0	0	0	0	0	0	0	0	0	0	0	0	0	0	0	0	0	0	0	0	0	0	0
d__Bacteria;p__Firmicutes;c__Negativicutes;o__Veillonellales-Selenomonadales;f__Veillonellaceae;g__Anaeroglobus	103	0	0	0	0	0	0	0	0	0	0	0	0	0	0	0	0	0	0	0	0	0	0	0	0	0	0	0	0	0	0	0	0	0	34	0	0	0	0	0	0	0	0	0	0	0	0	0	0
d__Bacteria;p__Proteobacteria;c__Alphaproteobacteria;o__Ferrovibrionales;f__Ferrovibrionales;g__Taonella	0	0	0	0	0	0	0	0	0	0	0	0	0	0	0	0	0	0	0	0	0	0	0	0	0	0	0	0	0	0	0	0	0	0	0	0	0	0	0	0	0	0	0	0	0	0	0	0	0
d__Bacteria;p__Proteobacteria;c__Gammaproteobacteria;o__Gammaproteobacteria_Incertae_Sedis;f__Unknown_Family;g__Acidibacter	0	0	0	0	0	0	0	0	0	0	0	0	0	0	0	0	0	0	0	0	0	0	0	0	0	0	0	0	0	0	0	0	0	0	0	0	0	0	0	0	0	0	0	0	0	0	0	0	0
d__Bacteria;p__Proteobacteria;c__Alphaproteobacteria;o__Caulobacterales;f__Caulobacteraceae;g__Brevundimonas	0	0	0	0	17	11	0	0	0	0	0	0	20	0	0	0	0	15	0	0	29	0	22	0	0	0	4	0	0	0	0	0	11	0	14	0	0	0	0	0	0	0	0	0	11	0	0	27	0
d__Bacteria;p__Firmicutes;c__Clostridia;o__Peptostreptococcales-Tissierellales;f__Anaerovoracaceae;g__[Eubacterium]_brachy_group	0	0	0	0	0	0	0	0	0	0	0	0	0	0	0	0	0	0	0	0	0	10	0	0	0	0	17	0	0	0	0	0	0	0	0	0	0	0	0	0	0	0	0	0	0	0	0	0	0
d__Bacteria;p__Firmicutes;c__Clostridia;o__Peptostreptococcales-Tissierellales;f__Peptostreptococcaceae;g__Peptostreptococcaceae	0	0	0	0	0	0	0	0	0	0	0	0	0	0	0	0	0	0	0	0	0	0	0	0	0	0	0	0	0	0	0	0	0	0	0	0	0	0	0	6	0	4	0	0	0	0	0	0	0
d__Bacteria;p__Firmicutes;c__Bacilli;o__Lactobacillales;f__Carnobacteriaceae;g__Carnobacterium	0	0	0	0	17	0	0	0	0	0	0	0	0	0	0	0	0	18	0	0	0	0	15	0	0	0	0	0	0	0	0	0	0	0	0	0	0	0	0	0	0	0	0	0	11	0	0	0	0
d__Bacteria;p__Bacteroidota;c__Bacteroidia;o__Bacteroidales;__unclassification;__unclassification	0	0	0	0	0	0	0	0	0	0	0	0	0	0	0	0	0	0	0	0	0	0	0	0	0	0	0	0	0	0	0	0	0	0	0	0	0	0	0	0	0	0	0	0	0	0	0	0	0
d__Bacteria;p__Firmicutes;c__Clostridia;o__Lachnospirales;f__Lachnospiraceae;g__Catenibacillus	0	0	0	0	0	0	0	0	0	0	0	0	0	0	0	0	0	0	0	0	0	0	0	0	0	0	0	0	0	0	0	0	0	0	0	0	0	0	0	0	0	0	0	0	0	0	0	0	0
d__Bacteria;p__Firmicutes;c__Clostridia;o__Lachnospirales;f__Lachnospiraceae;g__[Bacteroides]_pectinophilus_group	0	0	0	0	0	0	0	0	0	0	0	0	0	0	0	0	0	0	0	0	0	0	0	0	0	0	0	0	0	0	0	0	0	7	0	0	0	0	0	0	0	0	0	0	0	0	0	0	0
d__Bacteria;p__Firmicutes;c__Clostridia;o__Peptostreptococcales-Tissierellales;f__Peptostreptococcaceae;g__Terrisporobacter	0	0	0	0	0	0	0	0	0	0	0	0	0	0	0	0	0	0	0	0	0	0	0	0	0	0	0	0	0	0	0	0	0	0	0	0	0	0	0	0	0	0	100	0	2	0	911	48	212
d__Bacteria;p__Firmicutes;c__Clostridia;o__Peptostreptococcales-Tissierellales;f__Anaerovoracaceae;g__[Eubacterium]_nodatum_group	0	0	0	0	0	0	0	0	0	0	0	347	0	0	0	0	0	0	0	0	0	0	0	0	0	0	0	0	0	0	0	0	0	0	0	0	0	336	0	0	0	50	0	0	0	0	0	0	0
d__Bacteria;p__Firmicutes;c__Bacilli;o__Erysipelotrichales;f__Erysipelotrichaceae;g__Merdibacter	0	0	0	0	0	0	0	0	0	0	0	0	0	0	0	0	0	0	0	0	0	0	0	0	0	0	0	0	0	0	0	0	0	0	0	0	0	0	0	0	0	0	0	0	0	0	0	0	0
d__Bacteria;p__Fusobacteriota;c__Fusobacteriia;o__Fusobacteriales;f__Leptotrichiaceae;g__Sneathia	0	10	0	0	0	0	0	0	0	0	0	0	0	0	0	0	0	0	0	0	0	0	0	0	0	0	0	0	0	0	0	0	0	0	0	0	0	0	0	0	64	0	0	0	0	0	0	0	0
d__Bacteria;p__Bacteroidota;c__Bacteroidia;o__Flavobacteriales;f__Weeksellaceae;__unclassification	0	0	0	0	0	0	0	0	0	0	0	0	0	0	0	0	0	0	0	0	0	0	7	0	0	0	0	0	0	0	0	0	0	0	0	0	0	0	0	0	0	0	0	0	0	0	0	0	0
d__Bacteria;p__Firmicutes;c__Clostridia;o__Peptostreptococcales-Tissierellales;f__Peptostreptococcaceae;__unclassification	0	0	0	0	0	0	0	0	0	0	0	0	0	0	0	0	0	0	0	0	0	0	0	0	0	0	0	0	0	0	0	0	0	0	0	0	0	0	0	0	0	0	6	0	7	0	65	0	0
d__Bacteria;p__Firmicutes;c__Clostridia;o__Oscillospirales;f__Ruminococcaceae;g__Paludicola	0	0	0	0	0	0	0	0	0	0	0	0	0	0	0	0	0	0	0	0	0	0	0	0	0	0	0	0	0	0	0	0	0	0	0	0	0	0	0	0	0	0	0	0	0	0	0	0	0
d__Bacteria;p__Firmicutes;c__Bacilli;o__Erysipelotrichales;f__Erysipelotrichaceae;g__Faecalitalea	0	0	0	0	0	0	0	0	0	0	0	0	0	0	0	0	0	0	0	0	0	0	0	0	0	0	0	0	0	0	0	0	0	0	22	0	0	0	0	0	0	0	0	0	0	0	0	0	0
d__Bacteria;p__Cyanobacteria;c__Cyanobacteriia;o__Cyanobacteriales;f__Phormidiaceae;g__Tychonema_CCAP_1459-11B	0	0	0	0	0	0	0	0	0	0	0	0	0	0	0	0	0	0	0	0	0	0	0	0	0	0	0	0	0	0	0	0	0	0	0	0	0	0	0	0	0	0	0	0	0	0	0	0	0
d__Bacteria;p__Firmicutes;c__Bacilli;o__Bacillales;f__Bacillaceae;g__Bacillus	0	0	0	0	0	0	0	0	0	0	0	0	0	0	0	0	0	0	0	0	0	0	0	0	0	0	0	0	0	0	0	0	0	0	0	0	0	0	0	0	0	0	0	0	0	0	0	0	0
d__Bacteria;p__Firmicutes;c__Negativicutes;o__Veillonellales-Selenomonadales;f__Selenomonadaceae;g__uncultured	0	0	0	0	0	0	0	0	0	0	0	0	0	0	0	0	0	0	0	0	0	0	3	0	0	0	0	0	0	0	0	0	0	0	0	0	0	0	0	0	0	0	0	0	0	0	204	0	0
d__Bacteria;p__Proteobacteria;c__Gammaproteobacteria;o__Enterobacterales;f__Yersiniaceae;g__Rahnella1	0	0	0	0	0	0	0	0	0	0	0	0	0	0	0	0	0	0	0	0	0	0	0	0	0	0	0	0	0	0	0	0	0	0	0	0	0	0	0	0	0	0	0	0	0	0	0	0	0
d__Bacteria;p__Actinobacteriota;c__Coriobacteriia;o__Coriobacteriales;f__Eggerthellaceae;g__uncultured	0	0	0	13	0	0	0	30	0	0	0	0	0	0	0	0	0	0	0	0	0	0	0	17	0	0	0	0	0	0	0	0	0	0	0	0	0	0	0	0	47	0	0	0	0	0	0	0	0
d__Bacteria;p__Firmicutes;c__Syntrophomonadia;o__Syntrophomonadales;f__Syntrophomonadaceae;__unclassification	0	0	0	0	0	0	0	0	0	0	0	0	0	0	0	0	0	0	0	0	0	0	0	0	0	0	0	0	0	0	0	0	0	0	0	0	0	0	0	0	0	0	0	0	0	0	0	0	0
d__Bacteria;p__Firmicutes;c__Bacilli;o__Erysipelotrichales;f__uncultured;g__uncultured	0	0	0	0	0	0	0	0	0	0	0	0	0	0	0	0	0	0	0	0	0	0	0	0	0	0	0	0	0	0	0	0	0	0	0	0	0	0	0	0	0	0	0	0	0	0	0	0	0
d__Bacteria;p__Firmicutes;c__Clostridia;o__Lachnospirales;f__Lachnospiraceae;g__Hungatella	0	0	0	29	0	0	0	0	0	0	0	0	0	0	0	0	0	0	0	0	0	0	0	0	0	10	38	0	0	0	0	0	0	0	0	0	0	0	0	0	0	13	0	27	0	10	0	0	0
d__Bacteria;p__Firmicutes;c__Clostridia;o__uncultured;f__uncultured;g__uncultured	0	0	0	0	0	0	0	0	0	0	0	0	0	0	0	0	0	0	0	0	0	0	0	0	0	0	0	0	0	0	0	0	0	0	0	0	0	0	0	0	0	0	0	0	0	0	0	0	0
d__Bacteria;p__Firmicutes;c__Bacilli;o__Lactobacillales;f__Streptococcaceae;g__Lactococcus	0	0	0	0	0	0	0	0	0	0	0	0	0	198	0	0	0	0	0	0	0	0	0	0	0	0	0	0	0	0	0	0	0	0	0	0	0	0	0	0	0	0	30	0	0	0	0	0	0
d__Bacteria;p__Proteobacteria;c__Alphaproteobacteria;o__Sphingomonadales;f__Sphingomonadaceae;g__Qipengyuania	0	0	0	0	0	0	0	0	0	0	0	0	0	0	0	0	0	0	0	0	0	0	0	0	0	0	0	0	0	0	0	0	0	0	0	0	0	0	0	0	0	0	0	0	0	0	0	0	0
d__Bacteria;p__Firmicutes;c__Clostridia;o__Oscillospirales;f__[Clostridium]_methylpentosum_group;g__[Clostridium]_methylpentosum_group	0	0	0	0	0	0	0	0	0	0	0	0	0	0	0	0	0	0	0	0	0	0	0	0	0	0	0	0	0	0	0	0	0	0	0	0	0	0	0	0	0	0	0	0	0	0	0	0	0
d__Bacteria;p__Firmicutes;c__Bacilli;o__Paenibacillales;f__Paenibacillaceae;g__Paenibacillus	0	0	0	0	0	0	0	0	0	0	0	0	0	0	0	0	0	0	0	0	0	0	0	0	0	0	0	0	0	0	0	0	0	0	0	0	0	0	0	0	0	0	0	0	0	0	0	0	9
d__Bacteria;p__Bacteroidota;c__Bacteroidia;o__Bacteroidales;f__Dysgonomonadaceae;g__Dysgonomonas	0	0	0	0	0	0	0	0	0	0	0	0	0	0	0	0	0	0	0	0	0	0	0	0	0	0	0	0	0	0	0	0	0	0	0	0	0	0	0	0	0	0	0	0	0	0	0	0	0
d__Bacteria;p__Proteobacteria;c__Gammaproteobacteria;o__Enterobacterales;f__Enterobacteriaceae;g__Raoultella	0	0	0	0	0	757	0	0	0	964	0	0	0	0	0	0	0	0	0	0	0	0	0	0	0	0	0	0	0	0	0	0	0	0	313	0	0	0	0	0	0	0	0	0	0	0	0	0	0
d__Bacteria;p__Actinobacteriota;c__Coriobacteriia;o__Coriobacteriales;f__Eggerthellaceae;g__CHKCI002	0	0	0	0	0	0	0	0	0	0	0	0	0	0	0	0	0	0	0	0	0	0	0	0	0	0	0	0	0	0	0	0	0	0	0	0	0	0	0	0	0	0	0	0	0	0	0	0	0
d__Bacteria;p__Patescibacteria;c__Saccharimonadia;o__Saccharimonadales;f__Saccharimonadaceae;g__TM7x	0	0	0	0	0	0	0	0	0	0	0	0	0	0	0	0	0	0	0	0	0	0	0	0	0	0	0	0	0	0	0	0	0	0	0	0	0	0	0	0	0	0	0	0	0	0	0	0	0
d__Bacteria;p__Proteobacteria;c__Gammaproteobacteria;o__Burkholderiales;__unclassification;__unclassification	0	0	0	0	0	0	0	0	0	0	0	0	0	0	0	0	0	0	0	0	0	0	0	0	0	0	0	0	0	0	0	0	0	0	0	0	0	0	0	0	0	0	0	0	0	0	0	0	0
d__Bacteria;p__Firmicutes;c__Clostridia;o__Lachnospirales;f__Lachnospiraceae;g__Butyrivibrio	0	0	0	0	0	0	0	0	0	0	0	0	0	0	0	0	0	0	0	0	0	0	0	0	0	0	0	0	0	0	0	0	0	0	0	0	0	0	0	0	0	0	0	0	0	0	23	0	0
d__Bacteria;p__Firmicutes;c__Clostridia;o__Lachnospirales;f__Lachnospiraceae;g__Lachnospiraceae_NK4B4_group	0	0	0	0	0	0	0	0	0	0	0	0	0	0	0	0	0	0	0	0	0	0	0	0	0	0	0	0	0	0	0	0	0	0	0	0	0	0	0	0	0	0	0	0	0	0	0	0	0
d__Bacteria;p__Proteobacteria;c__Gammaproteobacteria;o__Pseudomonadales;f__Moraxellaceae;g__Psychrobacter	0	0	0	0	21	15	0	0	0	0	0	0	0	0	0	0	0	29	0	0	17	0	27	0	0	0	3	10	0	5	6	0	16	0	36	0	0	0	0	0	0	0	0	0	29	0	0	0	0
d__Bacteria;p__Proteobacteria;c__Alphaproteobacteria;o__Rhodobacterales;f__Rhodobacteraceae;g__Amaricoccus	0	0	0	0	0	0	0	0	0	0	0	0	0	0	0	0	0	0	0	0	0	0	0	0	0	0	0	0	0	0	0	0	0	0	0	0	0	2	0	0	0	0	0	0	0	0	0	0	0
d__Bacteria;p__Firmicutes;c__Bacilli;o__Erysipelotrichales;f__Erysipelotrichaceae;g__Solobacterium	0	0	0	0	50	0	0	0	0	0	0	0	0	0	0	0	0	0	0	0	0	0	5	0	0	0	0	0	0	0	2	0	0	0	0	0	36	0	0	0	0	0	28	124	0	0	0	0	2
d__Bacteria;p__Firmicutes;c__Clostridia;o__Lachnospirales;f__Lachnospiraceae;g__Anaerostignum	0	0	0	0	0	0	0	0	0	0	0	0	0	0	0	0	0	0	0	0	0	0	0	0	0	0	0	0	0	0	0	0	0	0	0	0	0	0	0	0	0	0	0	0	0	0	0	0	0
d__Bacteria;p__Firmicutes;c__Bacilli;o__Bacillales;f__Planococcaceae;g__Lysinibacillus	0	0	0	0	0	0	0	0	0	0	0	0	0	0	0	0	0	0	0	0	0	0	0	0	0	0	0	0	0	0	0	0	0	0	0	0	0	0	0	0	0	0	0	0	0	0	0	0	0
d__Bacteria;p__Proteobacteria;c__Gammaproteobacteria;o__Burkholderiales;f__Neisseriaceae;g__uncultured	0	0	0	0	0	0	0	0	0	0	0	0	0	0	0	0	0	0	0	0	0	0	0	0	0	0	0	0	0	0	0	0	0	0	3	0	0	0	0	0	0	0	0	0	0	0	0	12	0
d__Bacteria;p__Bacteroidota;c__Bacteroidia;o__Bacteroidales;f__Muribaculaceae;g__CAG-873	0	0	0	0	0	0	0	0	0	0	0	0	0	0	0	0	0	0	0	0	0	0	0	0	0	0	0	0	0	0	0	0	0	0	0	0	0	0	0	0	0	0	0	0	0	0	0	0	0
d__Bacteria;p__Actinobacteriota;c__Coriobacteriia;o__Coriobacteriales;f__Eggerthellaceae;g__Adlercreutzia	0	0	0	0	11	0	0	0	0	0	0	0	146	0	0	0	0	0	0	0	0	24	0	0	0	0	0	0	0	0	0	0	0	0	0	0	0	0	0	0	0	11	24	0	0	0	0	0	0
d__Bacteria;p__Firmicutes;c__Clostridia;o__Peptostreptococcales-Tissierellales;f__Peptostreptococcaceae;g__uncultured	0	0	0	0	0	0	0	0	0	0	0	0	0	0	0	0	0	0	0	0	0	0	0	0	0	0	0	0	0	0	0	0	0	0	0	0	0	0	0	0	0	0	0	0	0	0	0	0	0
d__Bacteria;p__Deferribacterota;c__Deferribacteres;o__Deferribacterales;f__Deferribacteraceae;g__Mucispirillum	0	0	0	0	0	0	0	0	0	0	0	0	0	0	0	0	0	0	0	0	0	0	0	0	0	0	0	0	0	0	0	0	0	0	0	0	0	0	0	0	0	0	0	0	0	0	0	0	0
d__Bacteria;p__Firmicutes;c__Clostridia;o__Oscillospirales;f__Ruminococcaceae;g__Ruminococcaceae	0	0	0	0	0	0	0	0	0	0	0	0	0	0	0	0	0	0	0	0	0	0	0	0	0	0	0	0	0	0	0	0	0	0	0	0	0	0	0	0	0	0	0	0	0	0	0	0	0
d__Bacteria;p__Bacteroidota;c__Bacteroidia;o__Bacteroidales;f__Prevotellaceae;g__Prevotellaceae_UCG-003	0	0	0	0	5	0	0	0	0	0	0	0	0	0	0	0	0	0	0	0	0	0	0	9	0	0	0	0	0	0	0	0	0	0	0	0	0	0	0	0	0	0	30	0	0	0	0	0	0
d__Bacteria;p__Patescibacteria;c__Saccharimonadia;o__Saccharimonadales;f__Saccharimonadaceae;g__Candidatus_Saccharimonas	0	0	0	0	0	0	0	0	0	0	0	0	0	0	0	0	0	0	0	0	0	0	0	0	0	0	0	0	0	0	0	0	0	0	0	0	0	0	0	0	0	0	0	0	0	0	0	0	0
d__Bacteria;p__Proteobacteria;c__Gammaproteobacteria;o__Burkholderiales;f__Comamonadaceae;g__Aquabacterium	0	0	0	0	0	0	0	0	0	0	0	0	0	0	0	0	0	0	0	0	0	0	0	0	0	0	0	0	0	0	0	0	0	0	0	0	0	0	0	0	0	0	0	0	0	0	0	0	0
d__Bacteria;p__Firmicutes;c__Clostridia;o__Clostridia;f__Hungateiclostridiaceae;g__Mageibacillus	0	0	0	0	0	0	0	0	0	0	0	0	0	0	0	0	0	0	0	0	0	0	0	0	0	0	0	0	0	0	0	0	0	0	0	0	0	0	0	0	22	0	0	0	0	0	0	0	0
d__Bacteria;p__Firmicutes;c__Clostridia;o__Oscillospirales;f__Ruminococcaceae;g__Fournierella	0	0	0	29	0	36	0	0	0	0	0	0	0	0	0	0	0	0	0	0	0	0	0	0	0	0	0	0	0	0	0	0	0	0	0	0	0	0	0	0	0	0	10	0	0	0	0	0	0
d__Bacteria;p__Proteobacteria;c__Alphaproteobacteria;o__Rhodobacterales;f__Rhodobacteraceae;g__Paracoccus	0	0	0	0	0	0	0	0	0	0	0	0	0	0	0	0	0	0	0	0	0	0	0	0	0	0	0	0	0	0	0	0	0	0	0	0	0	0	0	0	0	0	0	0	0	0	0	14	0
d__Bacteria;p__Proteobacteria;c__Gammaproteobacteria;o__Vibrionales;f__Vibrionaceae;g__Photobacterium	0	0	0	0	0	0	0	0	0	0	0	0	0	0	0	0	0	0	0	0	0	0	0	0	0	0	0	0	0	0	0	0	0	0	0	0	0	0	0	0	0	0	0	0	0	0	0	0	0
d__Bacteria;p__Deinococcota;c__Deinococci;o__Deinococcales;f__Deinococcaceae;g__Deinococcus	0	0	0	0	0	0	0	0	0	0	0	0	0	0	0	0	0	0	0	0	0	0	0	0	0	0	0	0	0	0	0	0	0	0	0	0	0	2	0	0	0	0	0	0	0	0	0	0	0
d__Bacteria;p__Firmicutes;c__Clostridia;o__Peptostreptococcales-Tissierellales;f__Peptostreptococcaceae;g__Paeniclostridium	0	0	0	0	0	0	0	0	0	0	0	0	0	0	0	0	0	0	0	0	0	0	0	0	0	0	0	0	0	0	0	0	0	177	0	0	0	0	0	0	0	0	0	0	0	0	0	0	0
d__Bacteria;p__Actinobacteriota;c__Coriobacteriia;o__Coriobacteriales;f__Atopobiaceae;g__uncultured	0	0	0	0	0	0	0	0	0	0	0	0	0	10	0	0	0	0	0	0	0	0	0	0	0	0	0	0	0	0	0	0	0	0	0	0	0	0	0	0	0	0	0	0	0	0	0	0	0
d__Bacteria;p__Firmicutes;c__Negativicutes;o__Veillonellales-Selenomonadales;f__Veillonellaceae;__unclassification	0	0	0	0	0	0	0	19	0	0	0	0	0	2	0	0	0	0	0	0	0	0	0	0	0	0	0	0	0	0	0	0	0	0	0	0	0	0	0	0	0	0	0	0	0	0	0	0	0
d__Bacteria;p__Spirochaetota;c__Spirochaetia;o__Spirochaetales;f__Spirochaetaceae;g__Treponema	0	0	0	0	0	0	0	0	0	0	0	0	0	0	0	0	0	0	0	0	0	0	0	0	0	0	0	0	0	0	0	0	0	0	0	0	0	0	0	0	0	0	0	0	0	0	6	0	0
d__Bacteria;p__Actinobacteriota;c__Actinobacteria;o__Actinomycetales;f__Actinomycetaceae;g__Varibaculum	0	0	0	24	0	0	0	0	0	0	5	0	0	14	52	0	0	0	0	51	13	329	15	0	0	0	0	0	0	0	67	0	0	82	0	0	0	0	0	34	28	0	11	6	113	0	0	0	414
d__Bacteria;p__Bacteroidota;c__Bacteroidia;o__Sphingobacteriales;f__Sphingobacteriaceae;g__Sphingobacterium	0	21	0	0	246	115	0	0	0	0	0	0	0	0	0	0	7	401	0	0	281	0	459	0	0	0	21	67	0	30	80	0	182	0	179	0	0	0	0	0	0	0	0	0	167	0	0	0	0
d__Bacteria;p__Firmicutes;c__Bacilli;o__Erysipelotrichales;f__Erysipelotrichaceae;g__Catenisphaera	0	0	0	0	0	0	0	0	0	0	0	0	0	0	0	0	0	0	0	0	0	0	0	0	0	0	0	0	0	0	0	0	0	0	0	0	0	0	0	0	0	4	0	0	0	0	0	0	0
d__Bacteria;p__Actinobacteriota;c__Actinobacteria;o__Micrococcales;f__Micrococcaceae;__unclassification	0	0	0	0	0	0	0	0	0	0	0	0	0	0	0	0	0	0	0	0	0	0	0	0	0	0	0	0	0	0	0	0	0	0	0	0	0	0	0	4	0	0	0	0	0	0	0	0	0
d__Bacteria;p__Firmicutes;c__Clostridia;o__Lachnospirales;f__Lachnospiraceae;g__Lachnospiraceae_AC2044_group	0	0	0	0	0	0	0	0	0	0	0	0	0	0	0	0	0	0	0	0	0	0	0	0	0	0	0	0	0	0	0	0	0	0	0	0	0	0	0	7	0	0	0	0	0	0	0	0	0
d__Bacteria;p__Proteobacteria;c__Gammaproteobacteria;o__Burkholderiales;f__Oxalobacteraceae;g__Oxalobacter	0	0	0	0	0	0	0	0	0	0	0	0	0	0	0	0	0	0	0	0	0	0	0	0	0	0	0	0	0	0	0	0	0	0	0	0	0	0	0	0	0	0	0	0	0	0	0	0	0
d__Bacteria;p__Proteobacteria;c__Gammaproteobacteria;o__Enterobacterales;f__Morganellaceae;g__Proteus	0	0	0	0	0	0	0	0	0	0	0	0	0	0	0	0	0	0	0	0	0	0	0	0	0	0	0	0	0	0	0	0	0	0	0	0	0	0	0	0	0	0	0	2	0	0	0	0	0
d__Bacteria;p__Actinobacteriota;c__Coriobacteriia;o__Coriobacteriales;f__Eggerthellaceae;g__DNF00809	0	0	0	0	0	0	0	0	0	0	0	0	0	0	29	0	0	0	0	0	0	0	0	0	0	0	0	0	0	0	0	0	0	34	0	0	0	0	0	0	0	0	0	0	6	0	0	0	0
d__Bacteria;p__Proteobacteria;c__Alphaproteobacteria;o__Rhizobiales;f__Rhizobiaceae;g__Allorhizobium-Neorhizobium-Pararhizobium-Rhizobium	0	0	0	0	0	0	0	0	0	0	0	0	0	0	0	0	0	0	0	0	0	0	7	0	0	0	0	0	0	0	0	0	0	0	0	0	0	0	0	0	0	0	0	0	0	0	0	0	0
d__Bacteria;p__Firmicutes;c__Clostridia;o__Peptostreptococcales-Tissierellales;f__Anaerovoracaceae;g__Mogibacterium	0	0	0	0	0	0	0	0	0	0	0	0	0	13	4	0	0	0	0	0	0	0	0	0	0	0	0	0	10	0	0	0	0	0	0	0	0	4	0	0	0	8	0	0	0	0	0	0	8
d__Bacteria;p__Firmicutes;c__Bacilli;o__Acholeplasmatales;f__Acholeplasmataceae;g__Acholeplasma	0	0	0	0	0	0	0	0	0	0	0	0	0	0	0	0	0	0	0	0	0	0	0	0	0	0	0	0	0	0	0	0	0	0	0	0	0	0	0	0	0	0	0	0	0	0	0	0	0
d__Bacteria;p__Campilobacterota;c__Campylobacteria;o__Campylobacterales;f__Arcobacteraceae;g__Arcobacter	0	0	0	0	0	0	0	0	0	0	0	0	0	0	0	0	0	0	0	0	0	0	0	0	0	0	0	0	0	0	0	0	0	0	0	0	0	0	0	0	0	0	0	0	0	0	0	0	0
d__Bacteria;p__Firmicutes;c__Clostridia;o__Oscillospirales;f__Ruminococcaceae;g__Angelakisella	0	0	0	0	0	0	0	0	0	0	0	0	0	0	0	0	0	0	0	0	0	0	0	0	0	0	0	0	0	0	0	0	0	0	0	0	0	0	0	0	0	0	0	0	0	0	0	0	0
d__Bacteria;p__Firmicutes;c__Bacilli;o__Erysipelotrichales;f__Erysipelotrichaceae;g__uncultured	0	0	0	0	0	0	0	0	0	0	0	0	0	0	0	0	0	0	0	0	0	0	0	0	0	0	0	0	0	0	0	0	0	5	0	0	0	0	0	0	0	0	6	0	0	0	0	0	0
d__Bacteria;p__Bacteroidota;c__Bacteroidia;o__Bacteroidales;f__Muribaculaceae;g__Muribaculum	0	0	0	0	0	0	0	0	0	0	0	0	0	0	0	0	0	0	0	0	0	0	0	0	0	0	0	0	0	0	0	0	0	0	0	0	0	0	0	0	0	0	0	0	0	0	0	0	0
d__Bacteria;p__Proteobacteria;c__Gammaproteobacteria;o__Enterobacterales;f__Erwiniaceae;__unclassification	0	0	0	0	0	0	0	0	0	0	0	0	0	0	0	0	0	0	0	0	0	0	0	0	0	0	0	0	0	0	0	0	0	0	0	0	0	0	0	0	0	0	0	0	0	0	0	0	0
d__Bacteria;p__Firmicutes;c__Clostridia;o__Lachnospirales;f__Lachnospiraceae;g__CHKCI001	0	0	0	0	0	0	0	0	0	0	0	0	0	0	0	0	0	0	0	0	0	0	0	0	0	0	0	0	0	0	0	0	0	0	0	0	0	0	0	0	0	0	0	0	0	0	0	0	0
d__Bacteria;p__Proteobacteria;c__Gammaproteobacteria;o__Enterobacterales;f__Enterobacteriaceae;g__Cronobacter	0	0	0	0	0	279	0	0	0	0	0	0	0	0	0	0	0	0	0	0	0	0	0	0	0	0	0	0	0	0	0	0	0	0	0	0	0	0	0	0	0	0	0	0	0	0	0	0	0
d__Bacteria;p__Firmicutes;c__Clostridia;o__Lachnospirales;f__Lachnospiraceae;g__Lachnotalea	0	0	0	0	0	0	0	0	0	0	0	0	0	0	0	0	0	0	0	0	0	0	0	0	0	0	0	0	0	0	0	0	0	0	0	0	0	0	0	0	0	0	0	0	0	0	0	0	0
d__Bacteria;p__Actinobacteriota;c__Actinobacteria;o__Bifidobacteriales;f__Bifidobacteriaceae;__unclassification	0	6	0	0	0	0	0	0	0	0	0	0	0	0	0	0	0	0	0	0	0	0	0	0	0	0	0	0	0	0	0	0	0	0	0	0	0	0	0	0	0	0	0	0	0	0	0	0	0
d__Bacteria;p__Proteobacteria;c__Gammaproteobacteria;o__Burkholderiales;f__Hydrogenophilaceae;g__Hydrogenophilus	0	0	0	0	0	0	0	0	0	0	16	0	175	0	0	0	0	0	0	0	0	0	0	0	0	0	0	0	0	0	0	0	0	0	0	0	0	2	0	0	2	0	0	0	0	0	0	831	0
d__Bacteria;p__Planctomycetota;c__Planctomycetes;o__Pirellulales;f__Pirellulaceae;g__uncultured	0	0	0	0	0	0	0	0	0	0	0	0	0	0	0	0	0	0	0	0	0	0	0	0	0	0	0	0	0	0	0	0	0	0	0	0	0	0	0	0	0	0	0	0	0	0	0	0	0
d__Bacteria;p__Proteobacteria;c__Gammaproteobacteria;o__Enterobacterales;f__Pectobacteriaceae;g__Dickeya	0	0	0	0	0	0	0	0	0	0	0	0	0	0	0	0	0	0	0	0	0	0	0	0	0	0	0	0	0	0	0	0	0	0	0	0	0	0	0	0	0	0	0	0	0	0	0	0	0
d__Bacteria;p__Proteobacteria;c__Gammaproteobacteria;o__Enterobacterales;f__Hafniaceae;g__Hafnia-Obesumbacterium	0	0	0	0	0	0	0	0	0	0	0	0	0	0	0	0	0	0	0	0	0	0	0	0	0	0	0	0	0	0	0	0	0	0	0	0	0	0	0	0	0	0	6	0	0	0	0	0	0
d__Bacteria;p__Proteobacteria;c__Gammaproteobacteria;o__Aeromonadales;f__Succinivibrionaceae;__unclassification	0	0	0	0	0	0	0	0	0	0	0	0	0	0	0	0	0	0	0	0	0	0	0	0	0	0	0	0	0	0	0	0	0	0	0	0	0	0	0	0	0	0	0	0	0	0	0	0	0
d__Bacteria;p__Proteobacteria;c__Gammaproteobacteria;o__Aeromonadales;f__Succinivibrionaceae;g__Succinivibrio	0	0	0	0	0	0	0	0	0	0	0	0	0	0	0	0	0	0	0	0	0	0	0	0	0	0	0	0	0	0	0	0	0	0	0	0	0	0	0	0	0	0	0	0	0	0	21	0	0
d__Bacteria;p__Fusobacteriota;c__Fusobacteriia;o__Fusobacteriales;f__Fusobacteriaceae;g__Cetobacterium	0	0	0	0	0	0	0	0	0	0	0	0	0	0	0	0	0	0	0	0	0	0	0	0	0	0	0	0	0	0	0	0	0	0	0	0	0	0	0	0	0	0	0	0	0	0	0	0	0
d__Bacteria;p__Firmicutes;c__Bacilli;o__Lactobacillales;f__Carnobacteriaceae;g__Dolosigranulum	0	0	0	0	0	0	0	0	0	0	0	0	0	0	0	0	0	0	0	0	0	0	0	0	0	0	0	0	0	0	0	0	0	0	0	0	0	0	0	0	0	0	0	0	0	0	0	0	0
d__Bacteria;p__Firmicutes;c__Clostridia;o__Oscillospirales;f__Oscillospiraceae;g__Papillibacter	0	0	0	0	0	0	0	0	0	0	0	0	0	0	0	0	0	0	0	0	0	0	0	0	0	0	0	0	0	0	0	0	0	0	0	0	0	0	0	0	0	0	0	0	0	0	0	0	0
d__Bacteria;p__Firmicutes;c__Clostridia;o__Oscillospirales;f__Oscillospiraceae;g__V9D2013_group	0	0	0	0	0	0	0	0	0	0	0	0	0	0	0	0	0	0	0	0	0	0	0	0	0	0	0	0	0	0	0	0	0	0	0	0	0	0	0	0	0	0	0	0	0	0	0	0	0
d__Bacteria;p__Firmicutes;c__Clostridia;o__Oscillospirales;f__Ruminococcaceae;g__Harryflintia	0	0	0	0	0	0	0	0	0	0	0	0	0	0	0	0	0	0	0	0	0	0	0	0	0	0	0	0	0	0	0	0	0	0	0	0	0	0	0	0	0	0	0	0	0	0	0	0	0
d__Bacteria;p__Proteobacteria;c__Alphaproteobacteria;o__Rhizobiales;f__Devosiaceae;g__Devosia	0	8	0	0	24	42	0	0	0	0	0	0	0	0	0	0	0	73	0	0	62	0	68	0	0	0	0	18	0	14	16	0	37	0	26	0	0	0	6	0	0	0	0	0	18	0	0	0	0
d__Bacteria;p__Firmicutes;c__Clostridia;o__Oscillospirales;f__Ruminococcaceae;g__Caproiciproducens	0	0	0	0	0	0	0	0	0	0	0	0	0	0	0	0	0	0	0	0	0	0	0	0	0	0	0	0	0	0	0	0	0	0	0	0	0	0	0	0	0	0	0	0	0	0	0	0	0
d__Bacteria;p__Patescibacteria;c__Saccharimonadia;o__Saccharimonadales;f__Saccharimonadaceae;__unclassification	0	0	0	0	0	0	0	0	0	0	0	0	0	0	0	0	0	0	0	0	0	0	0	0	0	0	0	0	0	0	0	0	0	0	0	0	0	0	0	0	0	0	0	0	0	0	0	0	0
d__Bacteria;p__Proteobacteria;c__Alphaproteobacteria;o__Sphingomonadales;f__Sphingomonadaceae;g__Sphingopyxis	0	0	0	0	0	0	0	0	0	0	0	0	0	0	0	0	0	0	0	0	0	0	0	0	0	0	0	0	0	0	0	0	0	0	0	0	0	0	0	0	0	0	0	0	0	0	0	4	0
d__Bacteria;p__Firmicutes;c__Bacilli;o__Lactobacillales;f__Aerococcaceae;g__Eremococcus	0	0	0	0	0	0	0	0	0	0	0	0	0	0	0	0	0	0	0	0	0	0	0	0	0	0	0	0	0	0	0	0	0	0	0	0	0	0	0	0	0	0	0	0	0	0	0	0	0
d__Bacteria;p__Firmicutes;c__Clostridia;o__Caldicoprobacterales;f__Caldicoprobacteraceae;g__Caldicoprobacter	0	0	0	0	0	0	0	0	0	0	0	0	0	0	0	0	0	0	0	0	0	0	0	0	0	0	0	0	0	0	0	0	0	0	0	0	0	0	0	0	0	0	0	0	0	0	0	0	0
d__Bacteria;p__Proteobacteria;c__Alphaproteobacteria;o__Rhizobiales;f__Rhizobiaceae;__unclassification	0	0	0	0	0	0	0	0	0	0	0	0	0	0	0	0	0	0	0	0	0	0	0	0	0	0	0	0	0	12	0	0	0	0	5	0	0	0	0	0	0	0	0	0	0	0	0	0	0
d__Bacteria;p__Actinobacteriota;c__Actinobacteria;o__Propionibacteriales;f__Nocardioidaceae;__unclassification	0	0	0	0	0	0	0	0	0	0	0	0	0	0	0	0	0	0	0	0	0	0	0	0	0	0	0	0	0	0	0	0	0	0	0	0	0	0	0	0	0	0	0	0	0	0	0	0	0
d__Bacteria;p__Firmicutes;c__Bacilli;o__Bacillales;f__Planococcaceae;g__Planomicrobium	0	0	0	0	0	0	0	0	0	0	0	0	0	0	0	0	0	0	0	0	0	0	0	0	0	0	0	0	0	0	0	0	0	0	0	0	0	0	0	0	0	0	0	0	0	0	0	0	0
d__Bacteria;p__Firmicutes;c__Clostridia;o__Lachnospirales;f__Lachnospiraceae;g__Lactonifactor	0	0	0	0	0	0	0	0	0	0	0	0	0	0	0	0	0	0	0	0	0	0	0	0	0	0	0	0	0	0	0	0	0	0	11	0	0	0	0	0	0	0	0	0	0	0	0	0	0
d__Bacteria;p__Firmicutes;c__Clostridia;o__Lachnospirales;f__Lachnospiraceae;g__Frisingicoccus	0	0	0	0	0	0	0	0	0	0	0	0	0	0	0	0	0	0	0	0	0	0	0	0	0	0	0	0	0	8	0	0	0	0	0	0	0	0	6	0	0	0	0	0	0	0	0	0	0
d__Bacteria;p__Firmicutes;c__Clostridia;o__Oscillospirales;f__Butyricicoccaceae;__unclassification	0	0	0	0	0	0	0	0	30	0	0	0	0	0	0	0	0	0	0	0	0	0	6	0	0	0	0	0	9	0	0	0	0	0	0	0	0	0	0	0	0	0	85	0	0	0	0	0	0
d__Bacteria;p__Firmicutes;c__Bacilli;o__Lactobacillales;f__Aerococcaceae;g__Facklamia	0	0	0	0	0	0	0	0	0	0	0	0	0	0	34	75	0	0	0	0	0	0	0	0	0	0	0	8	0	0	228	0	0	0	0	0	0	0	0	0	0	20	0	0	70	0	0	0	96
d__Bacteria;p__Spirochaetota;c__Spirochaetia;o__Spirochaetales;f__Spirochaetaceae;g__Sphaerochaeta	0	0	0	0	0	0	0	0	0	0	0	0	0	0	0	0	0	0	0	0	0	0	0	0	0	0	0	0	0	0	0	0	0	0	0	0	0	0	0	0	0	0	0	0	0	0	0	0	0
d__Bacteria;p__Verrucomicrobiota;c__Lentisphaeria;o__Victivallales;f__Victivallaceae;g__Victivallaceae	0	0	0	0	0	0	0	0	0	0	0	0	0	0	0	0	0	0	0	0	0	0	0	0	0	0	0	0	0	0	0	0	0	0	0	0	0	0	0	0	0	0	0	0	0	0	0	0	0
d__Bacteria;p__Actinobacteriota;c__Coriobacteriia;o__Coriobacteriales;f__Coriobacteriales_Incertae_Sedis;g__Raoultibacter	0	0	0	0	0	0	0	0	0	0	0	0	0	0	0	0	0	0	0	0	0	0	0	0	0	0	0	0	0	0	0	0	0	0	0	0	0	0	0	0	0	0	0	0	0	0	0	0	0
d__Bacteria;p__Proteobacteria;c__Alphaproteobacteria;o__Rhizobiales;f__Rhizobiaceae;g__Pseudochrobactrum	0	0	0	0	49	0	0	0	0	0	0	0	0	0	0	0	4	52	0	0	28	0	60	0	0	0	0	0	0	0	19	0	28	0	28	0	0	0	0	0	0	0	0	0	22	0	0	0	0
d__Bacteria;p__Bacteroidota;c__Bacteroidia;o__Bacteroidales;f__p-2534-18B5_gut_group;g__p-2534-18B5_gut_group	0	0	0	0	0	0	0	0	0	0	0	0	0	0	0	0	0	0	0	0	0	0	0	0	0	0	0	0	0	0	0	0	0	0	0	0	0	0	0	0	0	0	0	0	0	0	0	0	0
d__Bacteria;p__Bacteroidota;c__Bacteroidia;o__Flavobacteriales;f__Flavobacteriaceae;g__Capnocytophaga	0	0	0	0	0	0	0	0	0	0	0	0	0	0	0	0	0	0	0	0	0	0	0	0	0	0	0	0	0	0	0	0	0	0	0	0	0	0	0	0	0	0	0	0	0	0	0	0	0
d__Bacteria;p__Actinobacteriota;c__Actinobacteria;o__Micrococcales;f__Microbacteriaceae;g__Pseudoclavibacter	0	0	0	0	0	0	0	0	0	0	0	0	0	0	0	0	0	0	0	0	0	0	7	0	0	0	0	0	0	0	0	0	0	0	0	0	0	0	0	0	0	0	0	0	0	0	0	0	0
d__Bacteria;p__Proteobacteria;c__Gammaproteobacteria;o__Burkholderiales;f__Comamonadaceae;g__Acidovorax	0	0	0	0	0	0	0	0	0	0	0	0	0	0	0	0	0	0	0	0	0	0	0	0	0	0	0	0	0	0	0	0	0	0	0	0	0	0	0	0	0	0	0	0	0	0	0	0	0
d__Bacteria;p__Firmicutes;c__Bacilli;o__Acholeplasmatales;f__Acholeplasmataceae;g__Anaeroplasma	0	0	0	0	0	0	0	0	0	0	0	0	0	0	0	0	0	0	0	0	0	0	0	0	0	0	0	0	0	0	0	0	0	0	0	0	0	0	0	0	0	0	0	0	0	0	0	0	0
d__Bacteria;p__Actinobacteriota;c__Actinobacteria;o__Corynebacteriales;f__Corynebacteriaceae;g__Corynebacteriaceae	0	0	0	0	0	0	0	0	0	0	0	0	0	0	0	0	0	0	0	379	0	0	875	0	0	0	0	0	0	0	0	0	0	0	0	0	0	0	0	0	0	0	0	0	0	0	0	0	0
d__Bacteria;p__Firmicutes;c__Bacilli;o__Lactobacillales;f__Lactobacillaceae;g__Pediococcus	0	0	0	0	0	0	0	0	0	0	0	0	0	0	0	0	0	0	0	0	0	0	0	0	0	0	0	0	0	0	0	0	0	0	299	0	0	0	0	0	0	0	0	0	0	0	0	0	0
d__Bacteria;p__Firmicutes;c__Negativicutes;o__Veillonellales-Selenomonadales;f__Selenomonadaceae;__unclassification	0	0	0	0	0	0	0	0	0	0	0	0	0	0	0	0	0	0	0	0	0	0	0	0	0	0	0	0	0	0	0	0	0	0	0	0	0	0	0	0	0	0	0	0	0	0	27	0	0
d__Bacteria;p__Actinobacteriota;c__Actinobacteria;o__Pseudonocardiales;f__Pseudonocardiaceae;g__Actinomycetospora	0	0	0	0	0	0	0	0	0	0	0	0	0	0	0	0	0	0	0	0	70	0	0	0	0	0	0	0	0	0	0	0	0	0	0	0	0	0	0	0	0	0	0	0	0	0	0	0	0
d__Bacteria;p__Actinobacteriota;c__Actinobacteria;o__Corynebacteriales;f__Nocardiaceae;g__Rhodococcus	0	0	7	0	377	54	0	0	0	0	0	0	0	0	0	0	7	492	0	0	262	0	381	0	0	0	28	84	0	33	66	0	220	0	114	0	0	0	19	0	0	0	0	0	274	0	0	0	0
d__Bacteria;p__Actinobacteriota;c__Actinobacteria;o__Micrococcales;f__Sanguibacteraceae;g__Sanguibacter	0	0	0	0	0	0	0	0	0	0	0	0	0	0	0	0	0	0	0	0	0	0	10	0	0	0	0	0	0	0	0	0	0	0	0	0	0	0	0	0	0	0	0	0	0	0	0	0	0
d__Bacteria;p__Firmicutes;c__Clostridia;o__Lachnospirales;f__Lachnospiraceae;g__Lachnospiraceae	0	0	0	0	0	0	0	0	0	0	0	0	0	0	0	0	0	0	0	0	0	0	0	0	0	0	0	0	0	0	0	0	0	0	0	0	0	0	0	0	0	0	0	0	0	0	0	0	0
d__Bacteria;p__Bacteroidota;c__Bacteroidia;o__Sphingobacteriales;f__env.OPS_17;g__env.OPS_17	0	0	0	0	0	0	0	0	0	0	0	0	0	0	0	0	0	0	0	0	0	0	0	0	0	0	0	0	0	0	0	0	0	0	0	0	0	0	0	0	0	0	0	0	0	0	0	0	0
d__Bacteria;p__Proteobacteria;c__Gammaproteobacteria;o__Xanthomonadales;f__Rhodanobacteraceae;g__Chujaibacter	0	0	0	0	0	0	0	0	0	0	0	0	0	0	0	0	0	0	0	0	0	0	0	0	0	0	0	0	0	0	0	0	0	0	0	0	0	0	0	0	0	0	0	0	0	0	0	0	0
d__Bacteria;p__Actinobacteriota;c__Actinobacteria;o__Micrococcales;f__Micrococcaceae;g__Kocuria	0	0	0	0	0	0	0	0	0	0	0	0	0	0	0	0	0	0	0	0	0	10	0	0	0	0	0	0	0	0	0	0	0	0	0	0	0	0	0	0	0	0	0	0	0	0	0	0	0
d__Bacteria;p__Firmicutes;c__Clostridia;o__Clostridiales;f__Clostridiaceae;g__Clostridium_sensu_stricto_6	0	0	0	0	0	0	0	0	0	0	0	0	0	0	0	0	0	0	0	0	0	0	0	0	0	0	0	0	0	0	0	0	0	0	0	0	0	0	0	0	0	0	0	0	0	0	23	0	0
d__Bacteria;p__Proteobacteria;c__Gammaproteobacteria;o__Burkholderiales;f__Comamonadaceae;g__Delftia	0	16	0	0	145	98	0	0	0	0	0	0	0	0	0	0	6	318	0	0	197	0	404	0	0	0	14	66	0	32	72	0	132	0	176	0	0	0	13	0	0	0	0	0	69	0	0	0	0
d__Bacteria;p__Firmicutes;c__Clostridia;o__Peptostreptococcales-Tissierellales;f__Peptostreptococcales-Tissierellales;g__Gallicola	0	0	0	0	0	0	0	0	0	0	0	32	0	26	0	27	0	0	75	0	62	0	0	16	0	0	0	0	24	0	438	0	0	0	0	0	0	0	0	0	22	93	13	0	36	0	0	0	1313
d__Bacteria;p__Firmicutes;c__Clostridia;o__Oscillospirales;f__Ethanoligenenaceae;g__Acetanaerobacterium	0	0	0	0	0	0	0	0	0	0	0	0	0	0	0	0	0	0	0	0	0	0	0	0	0	0	0	0	0	0	0	0	0	0	0	0	0	0	0	0	0	0	0	0	0	0	0	0	0
d__Bacteria;p__Proteobacteria;c__Gammaproteobacteria;o__Burkholderiales;f__Oxalobacteraceae;__unclassification	0	0	0	0	4	3	0	0	0	0	0	0	0	0	0	0	0	17	0	0	0	0	9	0	0	0	0	0	0	0	0	0	0	0	0	0	0	0	0	0	0	0	0	0	0	0	0	0	0
d__Bacteria;p__Actinobacteriota;c__Actinobacteria;o__Micrococcales;f__Micrococcaceae;g__Micrococcus	0	0	0	0	17	0	0	0	0	0	0	0	0	0	0	0	0	0	0	0	0	0	0	0	0	0	0	0	0	0	0	0	0	21	0	0	0	0	0	0	0	0	0	0	0	0	0	0	0
d__Bacteria;p__Synergistota;c__Synergistia;o__Synergistales;f__Synergistaceae;g__Fretibacterium	0	0	0	0	0	0	0	0	0	0	0	0	0	0	0	0	0	0	0	0	0	0	0	0	0	0	4	0	0	0	0	0	0	0	0	0	0	0	0	0	0	0	0	0	0	0	0	0	0
d__Bacteria;p__Firmicutes;c__Clostridia;o__Lachnospirales;f__Lachnospiraceae;g__CAG-56	0	0	0	51	0	0	0	0	0	0	0	0	0	24	0	0	296	0	0	0	0	258	0	0	0	0	0	0	0	0	0	14	0	0	0	53	0	0	0	0	36	0	11	0	0	80	0	0	0
d__Bacteria;p__Firmicutes;c__Bacilli;o__Lactobacillales;f__Aerococcaceae;g__Abiotrophia	0	0	0	0	0	0	0	0	0	0	0	0	0	0	0	0	0	0	0	0	0	0	0	0	0	0	0	0	0	0	0	0	0	0	0	0	0	0	0	0	0	0	0	0	0	0	0	0	0
d__Bacteria;p__Firmicutes;c__Clostridia;o__Oscillospirales;f__Butyricicoccaceae;g__UCG-008	0	0	0	0	0	0	0	0	0	0	28	0	0	0	0	0	0	0	0	0	0	0	0	0	0	0	0	0	0	0	0	0	0	0	0	0	0	0	0	0	0	0	0	0	0	0	0	0	0
d__Bacteria;p__Proteobacteria;c__Gammaproteobacteria;o__Xanthomonadales;f__Xanthomonadaceae;g__Xanthomonas	0	0	0	0	0	0	0	0	0	0	0	0	0	0	0	0	0	0	0	0	0	0	0	0	0	0	0	0	0	0	0	0	0	0	0	0	0	0	0	0	0	0	0	0	0	0	0	74	0
d__Bacteria;p__Firmicutes;c__Clostridia;o__Oscillospirales;f__Oscillospiraceae;g__Pseudoflavonifractor	0	0	0	0	0	0	0	0	0	0	0	0	0	0	0	0	0	0	0	0	0	0	0	0	0	0	0	0	0	0	0	0	0	0	0	0	0	0	0	0	0	0	0	0	0	0	0	0	0
d__Bacteria;p__Proteobacteria;c__Alphaproteobacteria;o__Acetobacterales;f__Acetobacteraceae;g__Roseomonas	0	0	0	0	0	0	0	0	0	0	0	0	0	0	0	0	0	0	0	0	0	0	0	0	0	0	0	0	0	0	0	0	0	17	0	0	0	0	0	0	0	0	0	0	4	0	0	0	0
d__Bacteria;p__Proteobacteria;c__Alphaproteobacteria;o__Rhizobiales;f__Rhizobiaceae;g__Mesorhizobium	0	0	0	0	0	0	0	0	0	0	0	0	0	0	0	0	0	0	0	0	0	0	0	0	0	0	0	0	0	0	0	0	0	0	0	0	0	0	0	0	0	0	0	0	0	0	0	0	0
d__Bacteria;p__Bacteroidota;c__Bacteroidia;o__Flavobacteriales;f__Crocinitomicaceae;g__Fluviicola	0	0	0	0	0	0	0	0	0	0	0	0	0	0	0	0	0	9	0	0	0	0	5	0	0	0	0	0	0	0	0	0	7	0	4	0	0	0	0	0	0	0	0	0	0	0	0	0	0
d__Bacteria;p__Bacteroidota;c__Bacteroidia;__unclassification;__unclassification;__unclassification	0	0	0	0	0	0	0	0	0	0	0	0	0	0	0	0	0	0	0	0	0	0	0	0	0	0	0	0	0	0	0	0	0	0	0	0	0	0	0	0	0	0	0	0	0	0	0	0	0
d__Bacteria;p__Firmicutes;c__Clostridia;o__Oscillospirales;f__Oscillospirales;g__Hydrogenoanaerobacterium	0	0	0	0	0	0	0	0	0	0	5	0	0	0	0	0	0	0	0	0	0	0	0	0	0	0	0	0	0	0	0	0	0	0	0	0	0	0	0	0	0	6	0	25	0	0	0	0	0
d__Bacteria;p__Proteobacteria;c__Gammaproteobacteria;o__Burkholderiales;f__Comamonadaceae;g__Variovorax	0	0	0	0	0	0	0	0	0	0	0	0	0	0	0	0	0	0	0	0	0	0	0	0	0	0	0	0	0	0	0	0	0	0	0	0	0	0	0	0	0	0	0	0	0	0	0	0	0
d__Bacteria;p__Actinobacteriota;c__Actinobacteria;o__Micrococcales;f__Micrococcaceae;g__Paeniglutamicibacter	0	0	0	0	0	0	0	0	0	0	0	0	0	0	0	0	0	0	0	0	0	0	0	0	0	0	0	0	0	0	0	0	0	0	0	0	0	0	0	0	0	0	0	0	0	0	0	0	0
d__Bacteria;p__Firmicutes;c__Clostridia;o__Oscillospirales;f__Ruminococcaceae;g__Pygmaiobacter	0	0	0	0	0	0	0	0	0	0	0	0	0	0	0	0	0	0	0	0	0	0	0	0	0	0	0	0	0	0	0	0	0	0	0	0	0	0	0	0	0	0	0	0	0	0	0	0	0
d__Bacteria;p__Firmicutes;c__uncultured;o__uncultured;f__uncultured;g__uncultured	0	0	0	0	0	0	0	0	0	0	0	0	0	0	0	0	0	0	0	0	0	0	0	0	0	0	0	0	0	0	0	0	0	0	0	0	0	0	0	0	0	0	0	0	0	0	0	0	0
d__Bacteria;p__Actinobacteriota;c__Actinobacteria;o__Micrococcales;f__Dermatophilaceae;g__uncultured	0	0	0	0	0	0	0	0	0	0	0	0	0	0	0	0	0	0	0	0	0	0	0	0	0	0	0	0	0	0	0	0	0	0	0	0	0	0	0	0	0	0	0	0	0	0	0	0	0
d__Bacteria;p__Firmicutes;c__Bacilli;o__Erysipelotrichales;f__Erysipelatoclostridiaceae;g__uncultured	0	0	0	0	0	0	0	0	0	0	0	0	0	0	0	0	0	0	0	0	0	0	0	0	0	0	0	0	0	0	0	0	0	0	0	0	0	0	0	0	0	0	0	0	0	0	0	0	0
d__Bacteria;p__Bacteroidota;c__Bacteroidia;o__Bacteroidales;f__Tannerellaceae;g__Tannerella	0	0	0	0	0	0	0	0	0	0	0	0	0	0	0	0	0	0	0	0	0	0	0	0	0	0	0	0	0	0	0	0	0	0	0	0	0	0	0	0	0	0	0	0	0	0	0	5	0
d__Bacteria;p__Proteobacteria;c__Alphaproteobacteria;o__Rhizobiales;f__Xanthobacteraceae;g__Bradyrhizobium	0	0	0	0	0	0	0	0	0	0	0	0	0	0	0	0	0	0	0	0	0	0	0	0	0	0	0	0	0	0	0	0	0	0	0	0	0	0	0	0	0	0	0	0	0	0	0	0	0
d__Bacteria;p__Firmicutes;c__Clostridia;o__Lachnospirales;f__Lachnospiraceae;g__UC5-1-2E3	0	0	0	0	0	0	0	0	0	0	0	0	0	0	0	0	0	0	0	0	0	0	0	0	0	0	0	0	0	0	0	0	0	0	0	0	0	0	0	0	0	0	0	0	0	0	0	0	0
d__Bacteria;p__Firmicutes;c__Bacilli;o__Erysipelotrichales;f__Erysipelatoclostridiaceae;g__Candidatus_Stoquefichus	0	0	0	0	0	0	0	0	0	0	0	0	0	0	0	0	0	0	0	0	0	0	0	0	0	0	0	0	0	0	0	0	0	0	0	0	0	0	0	0	0	0	0	0	0	0	0	0	0
d__Bacteria;p__Bacteroidota;c__Bacteroidia;o__Flavobacteriales;f__Flavobacteriaceae;__unclassification	0	0	0	0	0	0	0	0	0	0	0	0	0	0	0	0	0	0	0	0	0	0	0	0	0	0	0	0	0	0	0	0	0	0	0	0	0	0	0	0	0	0	0	0	0	0	0	0	0
d__Bacteria;p__Firmicutes;c__Clostridia;o__Lachnospirales;f__Lachnospiraceae;g__Oribacterium	0	0	0	0	0	0	0	0	0	0	0	0	0	0	0	0	0	0	0	0	0	0	0	0	0	0	0	0	0	0	0	0	0	0	0	0	0	0	0	0	0	0	13	0	0	0	19	0	0
d__Bacteria;p__Firmicutes;c__Clostridia;o__Lachnospirales;f__Lachnospiraceae;g__Lachnospiraceae_NK3A20_group	0	0	0	0	0	0	0	0	0	0	0	0	0	0	0	0	0	0	0	0	0	0	0	0	0	0	0	0	0	0	0	0	0	0	0	0	0	0	0	0	0	0	0	0	0	0	0	0	0
d__Bacteria;p__Actinobacteriota;c__Actinobacteria;o__Bifidobacteriales;f__Bifidobacteriaceae;g__Alloscardovia	0	0	0	0	0	0	0	0	0	0	0	0	0	0	14	768	0	0	0	0	0	0	0	0	0	29	0	0	0	0	19	0	0	0	0	0	204	0	0	45	0	54	0	0	0	0	0	0	89
d__Bacteria;p__Campilobacterota;c__Campylobacteria;o__Campylobacterales;f__Helicobacteraceae;g__Helicobacter	0	0	0	0	0	0	0	0	0	0	0	0	0	0	0	0	0	0	0	0	0	0	0	0	0	0	0	0	0	0	0	0	0	0	0	0	0	0	0	0	0	0	0	0	0	0	0	7	0
d__Bacteria;p__Firmicutes;c__Bacilli;o__Erysipelotrichales;f__Erysipelotrichaceae;g__Bulleidia	0	0	0	0	0	0	0	0	0	0	0	0	0	0	0	0	0	0	0	0	0	0	0	0	0	0	0	0	0	0	0	0	0	0	0	0	0	0	0	0	0	0	0	0	0	0	0	0	0
d__Bacteria;p__Synergistota;c__Synergistia;o__Synergistales;f__Synergistaceae;g__uncultured	0	0	0	0	0	0	0	0	0	0	0	0	0	0	0	0	0	0	0	0	0	0	0	0	0	0	0	0	0	0	0	0	0	0	0	0	0	0	0	0	0	0	0	0	0	0	0	0	0
d__Bacteria;p__Proteobacteria;c__Alphaproteobacteria;o__Rhizobiales;f__Rhizobiaceae;g__Phyllobacterium	0	0	0	0	0	0	0	0	0	0	0	0	0	0	0	0	0	0	0	0	0	0	0	0	0	0	0	0	0	0	0	0	0	0	0	0	0	0	0	0	0	0	0	0	0	0	0	0	0
d__Bacteria;p__Verrucomicrobiota;c__Verrucomicrobiae;o__Pedosphaerales;f__Pedosphaeraceae;g__Ellin516	0	0	0	0	0	0	0	0	0	0	0	0	0	0	0	0	0	0	0	0	0	0	0	0	0	0	0	0	0	0	0	0	0	0	0	0	0	0	0	0	0	0	0	0	0	0	0	0	0
d__Bacteria;p__Desulfobacterota;c__Desulfovibrionia;o__Desulfovibrionales;f__Desulfovibrionaceae;__unclassification	0	0	0	0	0	0	0	0	0	0	0	0	0	0	0	0	0	0	0	0	0	0	0	0	0	0	0	0	0	0	0	0	0	0	0	0	0	0	0	0	0	0	0	0	0	0	0	0	0
d__Bacteria;p__Actinobacteriota;c__Actinobacteria;o__Corynebacteriales;f__Dietziaceae;g__Dietzia	0	0	0	0	0	0	0	0	0	0	0	0	0	0	0	0	0	0	0	0	0	0	0	0	0	0	0	0	0	0	0	0	0	0	0	0	0	0	0	0	0	0	0	0	0	0	0	0	0
d__Bacteria;p__Bacteroidota;c__Bacteroidia;o__Flavobacteriales;f__Weeksellaceae;g__Cloacibacterium	0	0	0	0	0	0	0	0	0	0	0	0	0	0	0	0	0	0	0	0	0	0	0	0	0	0	0	0	0	0	0	0	0	0	0	0	0	0	0	0	0	0	0	0	0	0	0	0	0
d__Bacteria;p__Desulfobacterota;c__Desulfuromonadia;o__Bradymonadales;f__Bradymonadales;g__Bradymonadales	0	0	0	0	0	0	0	0	0	0	0	0	0	0	0	0	0	0	0	0	0	0	0	0	0	0	0	0	0	0	0	0	0	0	0	0	0	0	0	0	0	0	0	0	0	0	0	0	0
d__Bacteria;p__Bacteroidota;c__Bacteroidia;o__Sphingobacteriales;f__Sphingobacteriaceae;g__Pedobacter	0	0	0	0	0	0	0	0	0	0	0	0	0	0	0	0	0	0	0	0	0	0	0	0	0	0	0	0	0	0	0	0	0	0	0	0	0	0	0	0	0	0	0	0	0	0	0	0	0
d__Bacteria;p__Firmicutes;c__Bacilli;o__Erysipelotrichales;f__Erysipelotrichaceae;g__Erysipelotrichaceae_UCG-006	0	0	0	0	0	0	0	0	0	0	0	0	0	0	0	0	0	0	0	0	0	0	0	0	0	0	0	0	0	0	0	0	0	0	0	0	0	0	0	0	0	0	0	0	0	0	0	0	0
d__Bacteria;p__Firmicutes;c__Clostridia;o__Clostridiales;f__Clostridiaceae;g__Clostridium_sensu_stricto_12	0	0	0	0	0	0	0	0	0	0	0	0	0	0	0	0	0	0	0	0	0	0	0	0	0	0	0	0	0	0	0	0	0	0	0	0	0	0	0	0	0	0	0	0	0	0	0	0	0
d__Bacteria;p__Firmicutes;c__Bacilli;o__Erysipelotrichales;f__Erysipelatoclostridiaceae;__unclassification	0	0	0	0	0	0	0	0	0	0	0	0	0	0	0	0	0	0	0	0	0	0	0	0	0	0	0	0	0	0	0	0	0	0	0	0	0	0	0	0	0	0	0	0	0	0	0	0	0
d__Bacteria;p__Firmicutes;c__Bacilli;o__Erysipelotrichales;f__Erysipelotrichaceae;g__Breznakia	0	0	0	0	0	0	0	0	0	0	0	0	0	0	0	0	0	0	0	0	0	0	0	0	0	0	0	0	0	0	0	0	0	0	0	0	0	0	0	0	0	0	0	0	0	0	0	0	0
d__Bacteria;p__Proteobacteria;c__Gammaproteobacteria;o__Alteromonadales;f__Shewanellaceae;g__Shewanella	0	0	0	0	0	0	0	0	0	0	0	0	0	0	0	0	0	0	0	0	0	0	0	0	0	0	0	0	0	0	0	0	0	0	0	0	0	0	0	42	0	0	0	0	0	0	0	0	0
d__Bacteria;p__Actinobacteriota;c__Actinobacteria;o__Micrococcales;f__Dermabacteraceae;g__Brachybacterium	0	0	0	0	0	0	0	0	0	0	0	0	0	0	0	0	0	0	0	0	0	0	0	0	0	0	0	0	0	0	0	0	0	0	0	0	0	0	0	0	0	58	0	0	0	0	0	0	0
d__Bacteria;p__Proteobacteria;c__Alphaproteobacteria;o__Azospirillales;f__Azospirillaceae;g__Niveispirillum	0	0	0	0	0	0	0	0	0	0	0	0	0	0	0	0	0	0	0	0	0	0	0	0	0	0	0	0	0	0	0	0	0	0	0	0	0	0	0	0	0	0	0	0	0	0	0	44	0
d__Bacteria;p__Firmicutes;c__Clostridia;o__Peptostreptococcales-Tissierellales;f__Sedimentibacteraceae;g__Sedimentibacter	0	0	0	0	0	0	0	0	0	0	0	0	0	0	0	0	0	0	0	0	0	0	0	0	0	0	0	0	0	0	0	0	0	0	0	0	0	0	0	0	0	0	0	0	0	0	0	0	0
d__Bacteria;p__Patescibacteria;c__Saccharimonadia;o__Saccharimonadales;__unclassification;__unclassification	0	0	0	0	0	0	0	0	0	0	0	0	0	0	0	0	0	0	0	0	0	0	0	0	0	0	0	0	0	0	0	0	0	0	0	0	0	0	0	0	0	0	0	0	0	0	0	0	0
d__Bacteria;p__Firmicutes;c__Bacilli;o__Mycoplasmatales;f__Mycoplasmataceae;g__Ureaplasma	0	0	0	0	0	0	0	0	0	0	0	0	0	0	0	0	0	0	0	0	0	0	0	0	0	0	0	0	0	0	0	0	0	0	0	0	0	0	0	0	0	0	0	0	0	0	0	0	0
d__Bacteria;p__Firmicutes;c__Clostridia;o__Lachnospirales;f__Lachnospiraceae;g__Robinsoniella	0	0	0	0	0	0	0	0	0	0	0	0	0	0	0	0	0	0	0	0	0	0	0	0	0	0	0	0	0	0	0	0	0	0	0	0	0	0	0	0	0	0	0	0	0	0	0	0	0
d__Bacteria;p__Firmicutes;c__Clostridia;o__Lachnospirales;f__Lachnospiraceae;g__Lachnospiraceae_XPB1014_group	0	0	0	0	0	0	0	0	0	0	0	0	0	0	0	0	0	0	0	0	0	0	0	0	0	0	0	0	0	0	0	0	0	0	0	0	0	0	0	0	0	0	0	0	0	0	0	0	0
d__Bacteria;p__Proteobacteria;c__Gammaproteobacteria;o__Burkholderiales;f__Methylophilaceae;__unclassification	0	0	0	0	0	0	0	0	0	0	0	0	14	0	0	0	0	0	0	0	0	0	0	0	0	0	0	0	0	0	0	0	0	0	0	0	0	0	0	0	0	0	0	0	0	0	0	0	0
d__Bacteria;p__Proteobacteria;c__Alphaproteobacteria;o__Rhizobiales;f__Xanthobacteraceae;g__Afipia	0	0	0	0	0	0	0	0	0	0	0	0	0	0	0	0	0	0	0	0	0	0	0	0	0	0	0	0	0	0	0	0	0	0	0	0	0	0	0	0	0	0	0	0	0	0	0	13	0
d__Bacteria;p__Proteobacteria;c__Gammaproteobacteria;o__Burkholderiales;f__Neisseriaceae;g__Kingella	0	0	0	0	0	0	0	0	0	0	0	0	0	0	0	0	0	0	0	0	0	0	0	0	0	0	0	0	0	0	0	0	0	0	0	0	0	0	0	0	0	0	0	0	0	0	0	8	0
d__Bacteria;p__Proteobacteria;c__Gammaproteobacteria;o__Enterobacterales;f__Morganellaceae;g__Providencia	0	0	0	0	0	0	0	0	0	0	0	0	0	0	0	0	0	0	0	0	0	0	0	0	0	0	0	0	0	0	0	0	0	0	0	0	0	0	0	0	0	0	0	0	0	0	0	0	0
d__Bacteria;p__Actinobacteriota;c__Actinobacteria;o__Micrococcales;f__Dermabacteraceae;g__Helcobacillus	0	0	0	0	0	0	0	0	0	0	0	0	0	0	0	0	0	0	0	0	0	0	0	0	0	0	0	0	0	0	0	0	0	0	0	0	0	0	0	0	0	10	0	0	0	0	0	0	0
d__Bacteria;p__Actinobacteriota;c__Coriobacteriia;o__Coriobacteriales;f__Atopobiaceae;g__Coriobacteriaceae_UCG-002	0	0	0	0	0	0	0	0	0	0	0	0	0	0	0	0	0	0	0	0	0	0	0	0	0	0	0	0	0	0	0	0	0	0	0	0	0	0	0	0	0	0	0	0	0	0	0	0	0
d__Bacteria;p__Firmicutes;c__Clostridia;o__Clostridiales;f__Clostridiaceae;g__Clostridium_sensu_stricto_18	0	0	0	0	0	0	0	0	0	0	0	0	0	0	0	0	0	0	0	0	0	0	0	0	0	0	0	0	0	0	0	0	0	0	0	0	0	0	0	0	0	0	0	0	0	0	0	0	0
d__Bacteria;p__Firmicutes;c__Clostridia;o__Lachnospirales;f__Lachnospiraceae;g__Johnsonella	0	0	0	0	0	0	0	0	0	0	0	0	0	0	0	0	0	0	0	0	0	0	0	0	0	0	0	0	0	0	0	0	0	0	0	0	0	0	0	0	0	0	0	0	0	0	0	0	0
d__Bacteria;p__Firmicutes;c__Clostridia;o__Clostridiales;f__Clostridiaceae;g__Sarcina	0	0	0	0	0	0	0	0	0	0	0	0	0	0	0	0	0	0	0	0	0	0	0	0	0	0	0	0	0	0	0	0	0	0	0	31	0	0	0	0	0	0	0	0	0	0	0	0	0
d__Bacteria;p__Firmicutes;c__Clostridia;o__Lachnospirales;f__Lachnospiraceae;g__Lachnoanaerobaculum	0	0	0	0	0	0	0	0	0	0	0	0	0	0	0	0	0	0	0	0	0	0	0	0	0	0	0	0	0	0	0	0	0	0	0	0	0	0	0	0	0	0	0	0	0	0	0	0	0
d__Bacteria;p__Firmicutes;c__Limnochordia;o__MBA03;f__MBA03;g__MBA03	0	0	0	0	0	0	0	0	0	0	0	0	0	0	0	0	0	0	0	0	0	0	0	0	0	0	0	0	0	0	0	0	0	0	0	0	0	0	0	0	0	0	0	0	0	0	0	0	0
d__Bacteria;p__Proteobacteria;c__Gammaproteobacteria;o__Oceanospirillales;f__Halomonadaceae;g__Halomonas	0	0	0	0	0	0	0	0	0	0	0	0	0	0	0	0	0	0	0	0	0	0	0	0	0	0	0	0	0	0	0	0	0	0	0	0	0	0	0	0	0	0	0	0	0	0	0	0	0
d__Bacteria;p__Cyanobacteria;c__Cyanobacteriia;o__Cyanobacteriales;f__Chroococcidiopsaceae;g__Aliterella	0	0	0	0	0	0	0	0	0	0	0	0	0	0	0	0	0	0	0	0	0	0	0	0	0	0	0	0	0	0	0	0	0	0	0	0	0	0	0	0	0	0	0	0	0	0	0	0	0
d__Bacteria;p__Firmicutes;c__Clostridia;o__Lachnospirales;f__Lachnospiraceae;g__A2	0	0	0	0	0	0	0	0	0	0	0	0	0	0	0	0	0	0	0	0	0	0	0	0	0	0	0	0	0	0	0	0	0	0	0	0	0	0	0	0	0	0	0	0	0	0	0	31	0
d__Bacteria;p__Proteobacteria;c__Gammaproteobacteria;__unclassification;__unclassification;__unclassification	0	0	0	0	0	0	0	0	0	0	0	0	0	0	0	0	0	0	0	0	0	0	0	0	0	0	0	0	0	0	0	0	0	0	0	0	0	0	0	0	0	0	0	0	0	0	0	0	0
d__Bacteria;p__Bacteroidota;c__Bacteroidia;o__Sphingobacteriales;f__Lentimicrobiaceae;g__Lentimicrobium	0	0	0	0	0	0	0	0	0	0	0	0	0	0	0	0	0	0	0	0	0	0	0	24	0	0	0	0	0	0	0	0	0	0	0	0	0	0	0	0	0	0	0	0	0	0	0	0	0
d__Bacteria;p__Firmicutes;c__Clostridia;o__Peptostreptococcales-Tissierellales;f__Peptostreptococcales-Tissierellales;__unclassification	0	0	0	0	0	0	0	0	0	0	0	0	0	0	0	0	0	0	0	0	0	0	0	0	0	0	0	0	0	0	0	0	0	0	0	0	0	0	0	0	0	0	0	0	0	0	0	0	0
d__Bacteria;p__Bacteroidota;c__Bacteroidia;o__Bacteroidales;f__Rikenellaceae;g__Rikenellaceae	0	0	0	0	0	0	0	0	0	0	0	0	0	0	0	0	0	0	0	0	0	0	0	0	0	0	0	0	0	0	0	0	0	0	0	0	0	0	0	0	0	0	0	0	0	0	0	0	0
d__Bacteria;p__Firmicutes;c__Clostridia;o__Lachnospirales;f__Lachnospiraceae;g__Herbinix	0	0	0	0	0	0	0	0	0	0	0	0	0	0	0	0	0	0	0	0	0	0	0	0	0	0	0	0	0	0	0	0	0	0	0	0	0	0	0	0	0	0	0	0	0	0	0	0	0
d__Bacteria;p__Actinobacteriota;c__Coriobacteriia;o__Coriobacteriales;f__Atopobiaceae;g__Libanicoccus	0	0	0	0	0	0	0	0	0	0	0	0	0	0	0	0	26	0	0	0	0	0	0	0	0	0	0	0	0	0	0	18	0	0	0	0	0	0	0	0	0	0	0	0	0	0	0	0	0
d__Bacteria;p__Firmicutes;c__Clostridia;o__Peptostreptococcales-Tissierellales;f__Peptostreptococcaceae;g__Paraclostridium	0	0	0	0	0	0	0	0	0	0	0	0	0	0	0	0	0	0	0	0	0	0	0	0	0	0	0	0	0	0	0	0	0	0	0	0	0	0	0	0	0	0	0	0	0	0	0	0	0
d__Bacteria;p__Firmicutes;c__Clostridia;o__Lachnospirales;f__Lachnospiraceae;g__Epulopiscium	0	0	0	0	0	0	0	0	0	0	0	0	0	0	0	0	0	0	0	0	0	0	0	0	0	0	0	0	0	0	0	0	0	0	0	0	0	0	0	0	0	0	0	0	0	0	0	13	50
d__Bacteria;p__Actinobacteriota;c__Actinobacteria;o__Actinomycetales;f__Actinomycetaceae;g__Actinobaculum	0	0	0	0	0	0	0	0	0	0	0	0	0	0	0	0	0	20	0	0	0	0	0	0	0	0	0	0	0	0	0	0	0	0	0	0	0	0	0	0	0	0	0	0	0	0	0	0	0
d__Bacteria;p__Actinobacteriota;c__Actinobacteria;o__Micrococcales;__unclassification;__unclassification	0	0	0	0	0	0	0	0	0	0	0	0	0	0	0	0	0	0	0	0	0	0	0	0	0	0	0	0	0	0	0	0	0	0	0	0	0	0	0	0	0	0	0	0	0	0	0	10	0
d__Bacteria;p__Bacteroidota;c__Bacteroidia;o__Chitinophagales;f__Chitinophagaceae;g__Asinibacterium	0	0	0	0	0	0	0	0	0	0	0	0	60	0	0	0	0	0	0	0	0	0	0	0	0	0	0	0	0	0	0	0	0	0	0	0	0	0	0	0	0	0	0	0	0	0	0	0	0
d__Bacteria;p__Firmicutes;c__Bacilli;o__Lactobacillales;f__Carnobacteriaceae;g__Trichococcus	0	0	0	0	0	0	0	0	0	0	0	0	0	0	0	0	0	0	0	0	0	0	0	0	0	0	0	0	0	0	0	0	0	0	0	0	0	0	0	0	0	0	0	0	0	0	0	0	0
d__Bacteria;p__Proteobacteria;c__Gammaproteobacteria;o__Xanthomonadales;f__Xanthomonadaceae;g__Luteimonas	0	0	0	0	0	0	0	0	0	0	0	0	0	0	0	0	0	0	0	0	0	0	0	0	0	0	0	0	0	0	0	0	0	0	0	0	0	0	0	0	0	0	0	0	0	0	0	0	0
d__Bacteria;p__Proteobacteria;c__Alphaproteobacteria;o__Caulobacterales;f__Caulobacteraceae;g__Caulobacter	0	0	0	0	0	0	0	0	0	0	0	0	0	0	0	0	0	0	0	0	0	0	0	0	0	0	0	0	0	0	0	0	0	0	0	0	0	0	0	0	0	0	0	0	0	0	0	47	0
d__Bacteria;p__Firmicutes;c__Clostridia;o__Eubacteriales;f__Eubacteriaceae;g__Pseudoramibacter	0	0	0	0	0	0	0	0	0	0	0	0	0	0	0	0	0	0	0	0	0	0	0	0	0	0	0	0	0	0	0	0	0	0	0	0	0	0	0	0	0	0	0	0	0	0	0	0	0
d__Bacteria;p__Proteobacteria;c__Alphaproteobacteria;o__Rhodobacterales;f__Rhodobacteraceae;__unclassification	0	0	0	0	0	0	0	0	0	0	0	0	0	0	0	0	0	0	0	0	8	0	0	0	0	0	0	0	0	0	0	0	0	0	0	0	0	0	0	0	0	0	0	0	0	0	0	0	0
d__Bacteria;p__Proteobacteria;c__Alphaproteobacteria;o__Micropepsales;f__Micropepsaceae;g__uncultured	0	0	0	0	0	0	0	0	0	0	0	0	0	0	0	0	0	0	0	0	0	0	0	0	0	0	0	0	0	0	0	0	0	0	0	0	0	0	0	0	0	0	0	0	0	0	0	0	0
d__Bacteria;p__Planctomycetota;c__Planctomycetes;o__Pirellulales;f__Pirellulaceae;g__p-1088-a5_gut_group	0	0	0	0	0	0	0	0	0	0	0	0	0	0	0	0	0	0	0	0	0	0	0	0	0	0	0	0	0	0	0	0	0	0	0	0	0	0	0	0	0	0	0	0	0	0	0	0	0
d__Bacteria;p__Firmicutes;c__Clostridia;o__Clostridiales;f__Clostridiaceae;g__Clostridium_sensu_stricto_13	0	0	0	0	0	0	0	0	0	0	0	0	0	0	0	0	0	0	0	0	0	0	0	0	0	0	0	0	0	0	0	0	0	0	0	0	0	0	0	0	0	0	0	0	0	0	0	0	0
d__Bacteria;p__Firmicutes;c__Negativicutes;o__Veillonellales-Selenomonadales;f__Veillonellaceae;g__uncultured	0	0	0	0	0	0	0	0	0	0	0	0	0	0	0	0	0	0	0	0	0	0	0	0	0	0	0	0	0	0	0	0	0	0	0	0	0	0	0	0	0	0	0	0	0	0	0	0	0
d__Bacteria;p__Proteobacteria;c__Gammaproteobacteria;o__Vibrionales;f__Vibrionaceae;g__Vibrio	0	0	0	0	0	0	0	0	0	0	0	0	0	0	0	0	0	0	0	0	0	0	0	0	0	0	0	0	0	0	0	0	0	0	0	0	0	0	0	0	0	0	0	0	0	0	0	0	0
d__Bacteria;p__Proteobacteria;c__Alphaproteobacteria;o__Rhizobiales;f__Rhizobiaceae;g__Ochrobactrum	0	0	0	0	0	0	0	0	0	0	0	0	0	0	0	0	0	0	0	0	0	0	0	0	0	0	0	0	0	0	0	0	0	0	0	0	0	0	0	0	0	0	0	0	0	0	0	0	0
d__Bacteria;p__Proteobacteria;c__Alphaproteobacteria;o__Rickettsiales;f__SM2D12;g__SM2D12	0	0	0	0	0	0	0	0	0	0	0	0	0	0	0	0	0	0	0	0	0	0	0	0	0	0	0	0	0	0	0	0	0	0	0	0	0	0	0	0	0	0	0	0	0	0	0	0	0
d__Bacteria;p__Proteobacteria;c__Gammaproteobacteria;o__Enterobacterales;f__Yersiniaceae;g__Yersinia	0	0	0	0	0	0	0	0	0	0	0	0	0	0	0	0	0	0	0	0	0	0	0	0	0	0	0	0	0	0	0	0	0	0	0	0	0	0	0	0	0	0	0	0	0	0	0	0	0
d__Bacteria;p__Proteobacteria;c__Alphaproteobacteria;o__Rhizobiales;f__Rhizobiales_Incertae_Sedis;g__Phreatobacter	0	0	0	0	0	0	0	0	0	0	0	0	0	0	0	0	0	0	0	0	0	0	0	0	0	0	0	0	0	0	0	0	0	0	0	0	0	0	0	0	0	0	0	0	0	0	0	0	0
d__Bacteria;p__Bacteroidota;c__Bacteroidia;o__Flavobacteriales;f__Flavobacteriaceae;g__Myroides	0	0	0	0	0	0	0	0	0	0	0	0	0	0	0	0	0	0	0	0	0	0	0	0	0	0	0	0	0	0	0	0	0	0	0	0	0	0	0	0	0	0	0	0	0	0	0	0	0
d__Bacteria;p__Proteobacteria;c__Gammaproteobacteria;o__Burkholderiales;f__Rhodocyclaceae;g__Dechlorobacter	0	0	0	0	0	0	0	0	0	0	0	0	0	0	0	0	0	0	0	0	0	0	0	0	0	0	0	0	0	0	0	0	0	0	0	0	0	0	0	0	0	0	0	0	0	0	0	0	0
d__Bacteria;p__Proteobacteria;c__Gammaproteobacteria;o__Burkholderiales;f__Methylophilaceae;g__Methylophilus	0	0	0	0	0	0	0	0	0	0	0	0	0	0	0	0	0	0	0	0	0	0	0	0	0	0	0	0	0	0	0	0	0	0	0	0	0	0	0	0	0	0	0	0	0	0	0	0	0
d__Bacteria;p__Actinobacteriota;c__Actinobacteria;__unclassification;__unclassification;__unclassification	0	0	0	0	0	0	0	0	0	0	0	0	0	0	0	0	0	0	0	0	0	0	2	0	0	0	0	0	0	0	0	0	0	0	0	0	0	0	0	0	0	2	0	0	0	0	0	0	0
d__Bacteria;p__Actinobacteriota;c__Actinobacteria;o__Actinomycetales;f__Actinomycetaceae;g__Arcanobacterium	0	0	0	0	0	0	0	0	0	0	0	0	0	0	62	17	0	0	0	0	0	0	0	0	0	0	0	0	0	0	55	0	0	0	0	0	0	0	0	20	0	0	0	0	0	0	0	0	192
d__Bacteria;p__Firmicutes;c__Clostridia;o__Lachnospirales;f__Lachnospiraceae;g__Lachnospiraceae_UCG-006	0	0	0	0	0	0	0	0	0	0	0	0	0	0	0	0	0	0	0	0	0	0	0	0	0	0	0	0	0	0	0	0	0	0	0	0	0	0	0	0	0	0	0	0	0	0	0	0	0
d__Bacteria;p__Bacteroidota;c__Bacteroidia;o__Flavobacteriales;f__Weeksellaceae;g__Bergeyella	0	0	0	0	0	0	0	0	0	0	0	0	0	0	0	0	0	0	0	0	0	0	0	0	0	0	0	0	0	0	0	0	0	0	0	0	0	0	0	0	0	0	0	0	0	0	0	0	0
d__Bacteria;p__Bacteroidota;c__Bacteroidia;o__Bacteroidales;f__Prevotellaceae;g__Prevotellaceae_UCG-004	0	0	0	0	0	0	0	0	0	0	0	0	0	0	0	0	0	0	0	0	0	0	0	0	0	0	0	0	0	0	0	0	0	0	0	0	0	0	0	0	0	0	0	0	0	0	0	0	0
d__Bacteria;p__Proteobacteria;c__Alphaproteobacteria;o__Sphingomonadales;f__Sphingomonadaceae;g__Blastomonas	0	0	0	0	0	0	0	0	0	0	0	0	0	0	0	0	0	0	0	0	0	0	0	0	0	0	0	0	0	0	0	0	0	0	0	0	0	0	0	0	0	0	0	0	0	0	0	0	0
d__Bacteria;p__Verrucomicrobiota;c__Verrucomicrobiae;o__Chthoniobacterales;f__Chthoniobacteraceae;g__Candidatus_Udaeobacter	0	0	0	0	0	0	0	0	0	0	0	0	0	0	0	0	0	0	0	0	0	0	0	0	0	0	0	0	0	0	0	0	0	0	0	0	0	0	0	0	0	0	0	0	0	0	0	0	0
d__Bacteria;p__Actinobacteriota;c__Actinobacteria;o__Micrococcales;f__Micrococcaceae;g__Arthrobacter	0	0	0	0	0	0	0	0	0	0	0	0	0	0	0	0	0	0	0	0	0	0	0	0	0	0	0	0	0	0	0	0	0	0	0	0	0	0	0	0	0	0	0	0	0	0	0	0	0
d__Bacteria;p__Firmicutes;c__Bacilli;__unclassification;__unclassification;__unclassification	0	0	0	0	0	0	0	0	0	0	0	0	0	0	0	0	0	0	0	0	0	0	0	0	0	0	0	0	0	12	0	0	0	0	0	0	0	0	0	0	0	0	0	0	0	0	0	0	0
d__Bacteria;p__Proteobacteria;c__Gammaproteobacteria;o__Pseudomonadales;f__Moraxellaceae;g__Moraxella	0	0	0	0	0	0	0	0	0	0	0	0	0	0	0	0	0	0	0	0	0	0	0	0	0	0	0	0	0	0	0	0	0	0	0	0	0	0	0	0	0	0	0	0	0	0	0	0	0
d__Bacteria;p__Firmicutes;c__Clostridia;o__Peptostreptococcales-Tissierellales;f__Peptostreptococcaceae;g__Clostridioides	0	0	0	0	0	0	0	0	0	0	0	0	0	0	0	0	0	0	0	0	0	0	0	0	0	0	0	0	0	0	0	0	0	0	0	31	0	0	0	116	0	0	0	0	0	0	0	0	0
d__Bacteria;p__Proteobacteria;c__Gammaproteobacteria;o__Enterobacterales;f__Enterobacteriaceae;g__Salmonella	0	0	0	0	0	0	0	0	0	0	0	0	0	0	0	0	0	0	0	0	0	0	0	0	0	0	0	0	0	0	0	0	0	0	0	0	0	0	0	0	0	0	0	0	0	0	0	0	0
d__Bacteria;p__Proteobacteria;c__Alphaproteobacteria;o__Sphingomonadales;f__Sphingomonadaceae;g__Sphingobium	0	0	0	0	0	0	0	0	0	0	0	0	12	0	0	0	0	0	0	0	0	0	0	0	0	0	0	0	0	0	0	0	0	0	0	0	0	0	0	0	0	0	0	0	0	0	0	0	0
d__Bacteria;p__Firmicutes;c__Bacilli;o__Erysipelotrichales;f__Erysipelatoclostridiaceae;g__Sharpea	0	0	0	0	0	0	0	0	0	0	0	0	0	0	0	0	0	0	0	0	0	0	0	0	0	0	0	0	0	0	0	0	0	0	0	0	0	0	0	0	0	0	0	0	0	0	0	0	0
d__Bacteria;p__Proteobacteria;c__Gammaproteobacteria;o__Enterobacterales;f__Budviciaceae;g__Leminorella	0	0	0	0	0	0	0	0	0	0	0	0	0	0	0	0	0	0	0	0	0	0	0	0	0	0	0	0	0	0	0	0	0	0	0	0	0	0	0	0	0	0	0	0	0	0	0	0	0
d__Bacteria;p__Proteobacteria;c__Gammaproteobacteria;o__Burkholderiales;f__Oxalobacteraceae;g__Herbaspirillum	0	0	0	0	0	0	0	0	0	0	0	0	0	0	0	0	0	0	0	0	0	0	0	0	0	0	0	0	0	0	0	0	0	0	0	0	0	0	0	0	0	0	0	0	0	0	0	0	0
d__Bacteria;p__Bacteroidota;c__Bacteroidia;o__Bacteroidales;f__Tannerellaceae;__unclassification	0	0	0	0	0	0	0	0	0	0	0	0	0	0	0	0	0	0	0	0	0	0	0	0	0	0	0	0	0	0	0	0	0	0	0	0	0	0	0	0	0	0	0	0	0	0	0	0	0
d__Bacteria;p__Proteobacteria;c__Alphaproteobacteria;o__Caulobacterales;f__Caulobacteraceae;g__uncultured	0	0	0	0	0	0	0	0	0	0	0	0	0	0	0	0	0	0	0	0	0	0	0	0	0	0	0	0	0	0	0	0	0	0	0	0	0	0	0	0	0	0	0	0	0	0	0	0	0
d__Bacteria;p__Firmicutes;c__Bacilli;o__Lactobacillales;f__Enterococcaceae;__unclassification	0	0	0	0	0	0	0	0	0	0	0	0	0	0	0	0	0	0	0	0	0	0	0	0	0	0	0	0	0	0	0	0	0	0	0	0	0	0	0	0	0	0	0	0	0	0	0	0	0
d__Bacteria;p__Firmicutes;c__Clostridia;o__Oscillospirales;f__Ethanoligenenaceae;g__uncultured	0	0	0	0	0	0	0	0	0	0	0	0	0	0	0	0	0	0	0	0	0	0	0	0	0	0	0	0	0	0	0	0	0	0	0	0	0	0	0	0	0	0	0	0	0	0	0	0	0
d__Bacteria;p__Proteobacteria;c__Alphaproteobacteria;o__Rhizobiales;f__Rhizobiaceae;g__Ensifer	0	0	0	0	23	15	0	0	0	0	0	0	0	0	0	0	0	54	0	0	33	0	34	0	0	0	11	0	0	0	13	0	0	0	37	0	0	0	0	0	0	0	0	0	32	0	0	0	0
d__Bacteria;p__Firmicutes;c__Clostridia;o__Oscillospirales;f__UCG-011;g__UCG-011	0	0	0	0	0	0	0	0	0	0	0	0	0	4	0	0	0	0	0	0	0	0	0	0	0	0	0	0	0	0	0	0	0	0	0	0	0	0	0	0	0	0	0	0	0	0	0	0	0
d__Bacteria;p__Fusobacteriota;c__Fusobacteriia;o__Fusobacteriales;f__Leptotrichiaceae;__unclassification	0	0	0	0	0	0	0	0	0	0	0	0	0	0	0	0	0	0	0	0	0	0	0	0	0	0	0	0	0	0	0	0	0	0	0	0	0	0	0	0	0	0	0	0	0	0	0	0	0
d__Bacteria;p__Cyanobacteria;c__Sericytochromatia;o__Sericytochromatia;f__Sericytochromatia;g__Sericytochromatia	0	0	0	0	0	0	0	0	0	0	0	0	0	0	0	0	0	0	0	0	0	0	2	0	0	0	0	0	0	0	0	0	0	0	0	0	0	0	0	0	0	0	0	0	0	0	0	0	0
d__Bacteria;p__Firmicutes;c__Clostridia;o__Clostridiales;f__Clostridiaceae;__unclassification	0	0	0	0	0	0	0	0	0	0	0	0	0	0	0	0	0	0	0	0	0	0	0	0	0	0	0	0	0	0	0	0	0	0	0	0	0	0	0	0	0	0	0	0	0	0	0	0	0
d__Bacteria;p__Bacteroidota;c__Bacteroidia;o__Chitinophagales;f__Saprospiraceae;g__uncultured	0	0	0	0	0	0	0	0	0	0	0	0	0	0	0	0	0	0	0	0	0	0	0	0	0	0	0	0	0	0	0	0	0	0	0	0	0	0	0	0	0	0	0	0	0	0	0	0	0
d__Bacteria;p__Proteobacteria;c__Gammaproteobacteria;o__Enterobacterales;f__Pectobacteriaceae;g__Pectobacterium	0	0	0	0	0	0	0	0	0	0	0	0	0	0	0	0	0	0	0	0	0	0	0	0	0	0	0	0	0	0	0	0	0	0	0	0	0	0	0	0	0	0	0	0	0	0	0	0	0
d__Bacteria;p__Firmicutes;c__Clostridia;o__Lachnospirales;f__Lachnospiraceae;g__Syntrophococcus	0	0	0	0	0	0	0	0	0	0	0	0	0	0	0	0	0	0	0	0	0	0	0	0	0	0	0	0	0	0	0	0	0	0	0	0	0	0	0	0	0	0	0	0	0	0	0	0	0
d__Bacteria;p__Firmicutes;c__Clostridia;o__Clostridiales;f__Clostridiaceae;g__Clostridium_sensu_stricto_3	0	0	0	0	0	0	0	0	0	0	0	0	0	0	0	0	0	0	0	0	0	0	0	0	0	0	0	0	0	0	0	0	0	0	0	0	0	0	0	0	0	0	0	0	0	0	0	0	0
d__Bacteria;p__Bacteroidota;c__Bacteroidia;o__Bacteroidales;f__Bacteroidales_Incertae_Sedis;g__Phocaeicola	0	0	0	0	0	0	0	0	0	0	0	0	0	0	0	0	0	0	0	0	0	0	0	0	0	0	0	0	0	0	0	0	0	0	0	0	0	0	0	0	0	0	0	0	0	0	0	0	0
d__Bacteria;p__Proteobacteria;c__Gammaproteobacteria;o__Burkholderiales;f__Alcaligenaceae;__unclassification	0	0	0	0	0	0	0	0	0	0	0	0	0	0	0	0	0	0	0	0	0	0	0	0	0	0	0	0	0	0	0	0	0	0	0	0	0	0	0	0	0	0	0	0	0	0	0	0	0
d__Bacteria;p__Bacteroidota;c__Bacteroidia;o__Flavobacteriales;f__Weeksellaceae;g__Chryseobacterium	0	0	0	0	0	0	0	0	0	0	0	0	0	0	0	0	0	0	0	0	0	0	0	0	0	0	0	0	0	0	0	0	0	0	0	0	0	0	0	0	0	0	0	0	0	0	0	0	0
d__Bacteria;p__Firmicutes;c__Clostridia;o__Lachnospirales;f__Lachnospiraceae;g__Catonella	0	0	0	0	0	0	0	0	0	0	0	8	0	0	0	0	0	0	0	0	0	0	0	0	0	0	0	0	0	0	0	0	0	0	0	0	0	0	0	0	0	0	0	0	0	0	0	0	0
d__Bacteria;p__Actinobacteriota;c__Actinobacteria;o__PeM15;f__PeM15;g__PeM15	0	0	0	0	0	0	0	0	0	0	0	0	0	0	0	0	0	0	0	0	0	0	0	0	0	0	0	0	0	0	0	0	0	0	0	0	0	0	0	0	0	0	0	0	0	0	0	0	0
d__Bacteria;p__Actinobacteriota;c__Coriobacteriia;o__Coriobacteriales;f__Coriobacteriaceae;g__Enorma	0	0	0	0	0	0	0	0	0	0	0	0	0	0	0	0	0	0	0	0	0	0	0	0	0	0	0	0	0	0	0	0	0	0	0	0	0	0	0	0	0	0	0	0	0	0	0	0	0
d__Bacteria;p__Proteobacteria;c__Alphaproteobacteria;o__Acetobacterales;f__Acetobacteraceae;g__Acetobacter	0	0	0	0	0	0	0	0	0	0	0	0	0	0	0	0	0	0	0	0	0	0	0	0	0	0	0	0	0	0	0	0	0	0	0	0	0	0	0	0	0	0	0	0	0	0	0	0	0
d__Bacteria;p__RCP2-54;c__RCP2-54;o__RCP2-54;f__RCP2-54;g__RCP2-54	0	0	0	0	0	0	0	0	0	0	0	0	0	0	0	0	0	0	0	0	0	0	0	0	0	0	0	0	0	0	0	0	0	0	0	0	0	0	0	0	0	0	0	0	0	0	0	0	0
d__Bacteria;p__Actinobacteriota;c__Coriobacteriia;o__Coriobacteriales;f__Eggerthellaceae;g__Parvibacter	0	0	0	0	0	0	0	0	0	0	0	0	0	0	0	0	0	0	0	0	0	0	0	0	0	0	0	0	0	0	0	0	0	0	0	0	0	0	0	0	0	0	0	0	0	0	0	0	0
d__Bacteria;p__Verrucomicrobiota;c__Lentisphaeria;o__Victivallales;f__Victivallaceae;__unclassification	0	0	0	0	0	0	0	0	0	0	0	0	0	0	0	0	0	0	0	0	0	0	0	0	0	0	0	0	0	0	0	0	0	0	0	0	0	0	0	0	0	0	0	0	0	0	0	0	0
d__Bacteria;p__Cyanobacteria;c__Cyanobacteriia;o__Phormidesmiales;f__Nodosilineaceae;g__Nodosilinea_PCC-7104	0	0	0	0	0	0	0	0	0	0	0	0	0	0	0	0	0	0	0	0	0	0	0	0	0	0	0	0	0	0	0	0	0	0	0	0	0	0	0	0	0	0	0	0	0	0	0	0	0
d__Bacteria;p__Firmicutes;c__Bacilli;o__Erysipelotrichales;__unclassification;__unclassification	0	0	0	0	0	0	0	0	0	0	0	0	0	0	0	0	0	0	0	0	0	0	0	0	0	0	0	0	0	0	0	0	0	0	0	0	0	0	0	0	0	0	0	0	0	0	0	0	0
d__Bacteria;p__Firmicutes;c__Clostridia;o__Clostridiales;f__Clostridiaceae;g__Clostridium_sensu_stricto_2	0	0	0	0	0	0	0	0	0	0	0	0	0	0	0	0	0	0	0	0	0	0	0	0	0	0	0	0	0	0	0	0	0	0	0	0	0	0	0	0	0	0	0	0	0	0	0	0	0
d__Bacteria;p__Firmicutes;c__Thermoanaerobacteria;o__Thermoanaerobacterales;f__Thermoanaerobacteraceae;g__Thermoanaerobacter	0	0	0	0	0	0	0	0	0	0	0	0	0	0	0	0	0	0	0	0	0	0	0	0	0	0	0	0	0	0	0	0	0	0	0	0	0	0	0	0	0	0	0	0	0	0	0	8	0
d__Bacteria;p__Proteobacteria;c__Alphaproteobacteria;o__Caulobacterales;f__Caulobacteraceae;__unclassification	0	0	0	0	0	0	0	0	0	0	0	0	0	0	0	0	0	0	0	0	0	0	0	0	0	0	0	0	0	0	0	0	0	0	0	0	0	0	0	0	0	0	0	0	0	0	0	0	0
d__Bacteria;p__Proteobacteria;c__Gammaproteobacteria;o__Burkholderiales;f__Burkholderiaceae;g__Cupriavidus	0	0	0	0	0	0	0	0	0	0	0	0	0	0	0	0	0	0	0	0	0	0	0	0	0	0	0	0	0	0	0	0	0	0	0	0	0	0	0	0	0	0	0	0	0	0	0	0	0
d__Bacteria;p__Actinobacteriota;c__Actinobacteria;o__Micrococcales;f__Dermatophilaceae;g__Mobilicoccus	0	0	0	0	0	0	0	0	0	0	0	0	0	0	0	0	0	0	0	0	31	0	0	0	0	0	0	0	0	0	0	0	0	0	0	0	0	0	0	0	0	0	0	0	0	0	0	0	0
d__Bacteria;p__Firmicutes;c__Negativicutes;o__Veillonellales-Selenomonadales;f__Veillonellaceae;g__Veillonellaceae	0	0	0	0	0	0	0	0	0	0	0	0	0	0	0	0	0	0	0	0	0	2	0	0	0	0	0	0	0	0	0	0	0	0	0	0	0	0	0	0	0	0	0	0	0	0	0	0	0
d__Bacteria;p__Firmicutes;c__Negativicutes;o__Veillonellales-Selenomonadales;__unclassification;__unclassification	0	0	0	0	0	0	0	0	0	0	0	0	0	0	0	0	0	0	0	0	0	0	0	0	0	0	0	0	0	0	0	0	0	0	0	0	0	0	0	0	0	0	0	0	0	0	0	0	0
d__Bacteria;p__Gemmatimonadota;c__Gemmatimonadetes;o__Gemmatimonadales;f__Gemmatimonadaceae;g__Roseisolibacter	0	0	0	0	0	0	0	0	0	0	0	0	0	0	0	0	0	0	0	0	0	0	0	0	0	0	0	0	0	0	0	0	0	0	0	0	0	0	0	0	0	0	0	0	0	0	0	0	0
[truncated: 788 more columns]

## Sheet: Table S4
Supplementary Table S4. The differences in the overall microbial taxonomic group in fecal samples between CRC patients and healthy control group
(A) The differences in the overall microbial taxonomic group in fecal samples between CRC patients and healthy control group in the female samlpes						(B) The differences in the overall microbial taxonomic group in fecal samples between CRC patients and healthy control group in the male samlpes
Taxon	value	group	LDA_score	p-value		Taxon	value	group	LDA_score	p-value
d__Bacteria.p__Firmicutes	5.80946	F.CRC	5.0078	1.54E-09		d__Bacteria.p__Firmicutes	5.77834	M.CRC	5.03032	6.59E-11
d__Bacteria.p__Actinobacteriota	4.98788	F.CRC	4.57776	2.22E-08		d__Bacteria.p__Actinobacteriota	5.08871	M.CRC	4.75001	1.96E-18
d__Bacteria.p__Campilobacterota	4.11701	F.CRC	3.83598	2.17E-11		d__Bacteria.p__Proteobacteria	5.05043	M.CRC	4.20545	0.0314787
d__Bacteria.p__Fusobacteriota	3.60446	F.CRC	3.17043	0.000762889		d__Bacteria.p__Fusobacteriota	4.18265	M.CRC	3.70581	0.00308083
d__Bacteria.p__Bacteroidota	5.67312	F.Normal	5.24758	2.64E-20		d__Bacteria.p__Campilobacterota	3.82076	M.CRC	3.55957	1.38E-16
d__Bacteria.p__Verrucomicrobiota	3.89147	F.Normal	3.23886	0.00119037		d__Bacteria.p__Verrucomicrobiota	3.81888	M.CRC	3.39182	0.0017672
d__Bacteria.p__Desulfobacterota	3.49025	F.Normal	3.03226	1.72E-06		d__Bacteria.p__Bacteroidota	5.70506	M.Normal	5.26888	4.53E-24
d__Bacteria.p__Firmicutes.c__Bacilli	5.23537	F.CRC	4.85191	5.49E-09		d__Bacteria.p__Desulfobacterota	3.81121	M.Normal	3.50406	1.25E-07
d__Bacteria.p__Firmicutes.c__Clostridia	5.65948	F.CRC	4.58482	0.00948436		d__Bacteria.p__Firmicutes.c__Clostridia	5.64991	M.CRC	4.74513	0.000976569
d__Bacteria.p__Actinobacteriota.c__Actinobacteria	4.94678	F.CRC	4.54351	1.88E-07		d__Bacteria.p__Firmicutes.c__Bacilli	5.10681	M.CRC	4.7206	1.43E-10
d__Bacteria.p__Campilobacterota.c__Campylobacteria	4.11701	F.CRC	3.83619	2.17E-11		d__Bacteria.p__Actinobacteriota.c__Actinobacteria	5.02973	M.CRC	4.69411	1.14E-13
d__Bacteria.p__Fusobacteriota.c__Fusobacteriia	3.60446	F.CRC	3.16905	0.000762889		d__Bacteria.p__Proteobacteria.c__Gammaproteobacteria	5.02264	M.CRC	4.13806	0.0148374
d__Bacteria.p__Bacteroidota.c__Bacteroidia	5.67312	F.Normal	5.24758	2.64E-20		d__Bacteria.p__Actinobacteriota.c__Coriobacteriia	4.19245	M.CRC	3.83206	7.47E-05
d__Bacteria.p__Firmicutes.c__Negativicutes	4.44721	F.Normal	3.76581	0.000241201		d__Bacteria.p__Fusobacteriota.c__Fusobacteriia	4.18265	M.CRC	3.70657	0.00308083
d__Bacteria.p__Verrucomicrobiota.c__Verrucomicrobiae	3.87182	F.Normal	3.21001	0.00862644		d__Bacteria.p__Campilobacterota.c__Campylobacteria	3.82076	M.CRC	3.55954	1.38E-16
d__Bacteria.p__Desulfobacterota.c__Desulfovibrionia	3.49025	F.Normal	3.02408	1.72E-06		d__Bacteria.p__Proteobacteria.c__Alphaproteobacteria	3.84263	M.CRC	3.47821	1.26E-07
d__Bacteria.p__Verrucomicrobiota.c__Lentisphaeria	2.53718	F.Normal	2.23177	0.00080696		d__Bacteria.p__Bacteroidota.c__Bacteroidia	5.70506	M.Normal	5.26888	4.53E-24
d__Bacteria.p__Firmicutes.c__Clostridia.o__Peptostreptococcales_Tissierellales	5.39094	F.CRC	5.1054	4.08E-13		d__Bacteria.p__Desulfobacterota.c__Desulfovibrionia	3.81121	M.Normal	3.50419	1.22E-07
d__Bacteria.p__Firmicutes.c__Bacilli.o__Lactobacillales	5.21089	F.CRC	4.86438	5.44E-14		d__Bacteria.p__Firmicutes.c__Negativicutes	4.46102	M.Normal	3.45246	0.00360118
d__Bacteria.p__Actinobacteriota.c__Actinobacteria.o__Corynebacteriales	4.26987	F.CRC	3.91928	9.59E-79		d__Bacteria.p__Verrucomicrobiota.c__Lentisphaeria	2.71404	M.Normal	2.40907	1.04E-06
d__Bacteria.p__Campilobacterota.c__Campylobacteria.o__Campylobacterales	4.11701	F.CRC	3.83616	2.17E-11		d__Bacteria.p__Firmicutes.c__Clostridia.o__Peptostreptococcales_Tissierellales	5.39734	M.CRC	5.10401	2.44E-22
d__Bacteria.p__Actinobacteriota.c__Actinobacteria.o__Actinomycetales	3.99885	F.CRC	3.73567	1.10E-22		d__Bacteria.p__Firmicutes.c__Bacilli.o__Lactobacillales	4.93292	M.CRC	4.56318	1.49E-10
d__Bacteria.p__Proteobacteria.c__Gammaproteobacteria.o__Pseudomonadales	3.93153	F.CRC	3.60838	4.91E-13		d__Bacteria.p__Actinobacteriota.c__Actinobacteria.o__Corynebacteriales	4.78007	M.CRC	4.48215	2.62E-43
d__Bacteria.p__Bacteroidota.c__Bacteroidia.o__Sphingobacteriales	3.73242	F.CRC	3.35492	2.50E-38		d__Bacteria.p__Firmicutes.c__Bacilli.o__Staphylococcales	4.53749	M.CRC	4.24449	9.78E-31
d__Bacteria.p__Fusobacteriota.c__Fusobacteriia.o__Fusobacteriales	3.60446	F.CRC	3.17117	0.000762889		d__Bacteria.p__Proteobacteria.c__Gammaproteobacteria.o__Pseudomonadales	4.51622	M.CRC	4.18708	6.61E-13
d__Bacteria.p__Proteobacteria.c__Gammaproteobacteria.o__Xanthomonadales	3.48123	F.CRC	3.14025	1.38E-31		d__Bacteria.p__Actinobacteriota.c__Actinobacteria.o__Bifidobacteriales	4.35947	M.CRC	3.88681	0.0115145
d__Bacteria.p__Firmicutes.c__Bacilli.o__Staphylococcales	3.41552	F.CRC	3.13986	8.22E-24		d__Bacteria.p__Actinobacteriota.c__Actinobacteria.o__Propionibacteriales	4.1954	M.CRC	3.86268	1.73E-24
d__Bacteria.p__Proteobacteria.c__Alphaproteobacteria.o__Rhizobiales	3.36257	F.CRC	3.01302	0.0157206		d__Bacteria.p__Actinobacteriota.c__Coriobacteriia.o__Coriobacteriales	4.19245	M.CRC	3.83206	7.47E-05
d__Bacteria.p__Actinobacteriota.c__Actinobacteria.o__Propionibacteriales	3.03197	F.CRC	2.70231	6.98E-56		d__Bacteria.p__Fusobacteriota.c__Fusobacteriia.o__Fusobacteriales	4.18265	M.CRC	3.70359	0.00308083
d__Bacteria.p__Firmicutes.c__Clostridia.o__Clostridia	2.77713	F.CRC	2.49643	0.00192909		d__Bacteria.p__Campilobacterota.c__Campylobacteria.o__Campylobacterales	3.82076	M.CRC	3.55956	1.38E-16
d__Bacteria.p__Proteobacteria.c__Gammaproteobacteria.o__Aeromonadales	2.73313	F.CRC	2.27443	3.93E-05		d__Bacteria.p__Bacteroidota.c__Bacteroidia.o__Sphingobacteriales	3.78683	M.CRC	3.44718	1.14E-12
d__Bacteria.p__Proteobacteria.c__Alphaproteobacteria.o__Caulobacterales	2.50161	F.CRC	2.1256	1.78E-11		d__Bacteria.p__Actinobacteriota.c__Actinobacteria.o__Actinomycetales	3.66285	M.CRC	3.40484	1.75E-12
d__Bacteria.p__Bacteroidota.c__Bacteroidia.o__Bacteroidales	5.67309	F.Normal	5.25342	2.15E-20		d__Bacteria.p__Proteobacteria.c__Alphaproteobacteria.o__Rhizobiales	3.57463	M.CRC	3.26165	0.00146883
d__Bacteria.p__Firmicutes.c__Clostridia.o__Oscillospirales	5.37727	F.Normal	4.92159	6.83E-15		d__Bacteria.p__Proteobacteria.c__Gammaproteobacteria.o__Xanthomonadales	3.56612	M.CRC	3.21145	7.10E-12
d__Bacteria.p__Proteobacteria.c__Gammaproteobacteria.o__Burkholderiales	4.30912	F.Normal	3.86517	1.05E-11		d__Bacteria.p__Actinobacteriota.c__Actinobacteria.o__Micrococcales	3.55707	M.CRC	3.18694	0.00051033
d__Bacteria.p__Firmicutes.c__Negativicutes.o__Acidaminococcales	4.12072	F.Normal	3.76803	5.77E-07		d__Bacteria.p__Firmicutes.c__Clostridia.o__Clostridia	3.33946	M.CRC	3.0594	3.80E-07
d__Bacteria.p__Firmicutes.c__Clostridia.o__Clostridia_UCG_014	3.99379	F.Normal	3.66023	1.61E-05		d__Bacteria.p__Proteobacteria.c__Alphaproteobacteria.o__Caulobacterales	2.74213	M.CRC	2.39034	8.34E-11
d__Bacteria.p__Firmicutes.c__Clostridia.o__Christensenellales	4.02227	F.Normal	3.569	9.92E-06		d__Bacteria.p__Bacteroidota.c__Bacteroidia.o__Flavobacteriales	2.71669	M.CRC	2.26812	0.00338332
d__Bacteria.p__Firmicutes.c__Bacilli.o__Erysipelotrichales	4.09112	F.Normal	3.40911	3.34E-06		d__Bacteria.p__Bacteroidota.c__Bacteroidia.o__Bacteroidales	5.70502	M.Normal	5.27587	3.73E-24
d__Bacteria.p__Verrucomicrobiota.c__Verrucomicrobiae.o__Verrucomicrobiales	3.85051	F.Normal	3.20433	0.0314479		d__Bacteria.p__Firmicutes.c__Clostridia.o__Oscillospirales	5.31966	M.Normal	4.82837	9.66E-17
d__Bacteria.p__Proteobacteria.c__Gammaproteobacteria.o__Pasteurellales	3.6548	F.Normal	3.11776	3.82E-05		d__Bacteria.p__Proteobacteria.c__Gammaproteobacteria.o__Burkholderiales	4.39144	M.Normal	3.90005	3.38E-13
d__Bacteria.p__Desulfobacterota.c__Desulfovibrionia.o__Desulfovibrionales	3.49025	F.Normal	3.03136	1.72E-06		d__Bacteria.p__Firmicutes.c__Clostridia.o__Lachnospirales	5.06172	M.Normal	3.88638	0.00115715
d__Bacteria.p__Proteobacteria.c__Alphaproteobacteria.o__Rhodospirillales	3.21954	F.Normal	2.92675	0.041599		d__Bacteria.p__Firmicutes.c__Negativicutes.o__Acidaminococcales	4.05166	M.Normal	3.6569	9.13E-06
d__Bacteria.p__Firmicutes.c__Clostridia.o__Monoglobales	3.20421	F.Normal	2.87569	3.46E-15		d__Bacteria.p__Desulfobacterota.c__Desulfovibrionia.o__Desulfovibrionales	3.81121	M.Normal	3.50419	1.22E-07
d__Bacteria.p__Firmicutes.c__Clostridia.o__Clostridia_vadinBB60_group	3.14847	F.Normal	2.76699	3.52E-06		d__Bacteria.p__Firmicutes.c__Clostridia.o__Clostridia_UCG_014	3.84199	M.Normal	3.48714	4.53E-06
d__Bacteria.p__Firmicutes.c__Bacilli.o__RF39	3.04711	F.Normal	2.7519	2.16E-07		d__Bacteria.p__Firmicutes.c__Clostridia.o__Christensenellales	3.77299	M.Normal	3.24392	0.00108659
d__Bacteria.p__Firmicutes.c__Bacilli.o__Izemoplasmatales	2.65262	F.Normal	2.34051	0.0348391		d__Bacteria.p__Firmicutes.c__Bacilli.o__Erysipelotrichales	4.00996	M.Normal	3.13427	4.24E-07
d__Bacteria.p__Verrucomicrobiota.c__Lentisphaeria.o__Victivallales	2.53718	F.Normal	2.22566	0.00080696		d__Bacteria.p__Proteobacteria.c__Gammaproteobacteria.o__Pasteurellales	3.67127	M.Normal	3.12166	7.10E-06
d__Bacteria.p__Firmicutes.c__Clostridia.o__Peptostreptococcales_Tissierellales.f__Peptostreptococcales_Tissierellales	5.31971	F.CRC	5.0363	8.03E-44		d__Bacteria.p__Firmicutes.c__Clostridia.o__Clostridia_vadinBB60_group	3.15119	M.Normal	2.80968	4.29E-06
d__Bacteria.p__Firmicutes.c__Bacilli.o__Lactobacillales.f__Enterococcaceae	5.04258	F.CRC	4.70199	1.86E-07		d__Bacteria.p__Firmicutes.c__Bacilli.o__RF39	2.98019	M.Normal	2.67029	6.02E-08
d__Bacteria.p__Proteobacteria.c__Gammaproteobacteria.o__Enterobacterales.f__Enterobacteriaceae	4.95786	F.CRC	4.52557	0.0480502		d__Bacteria.p__Firmicutes.c__Clostridia.o__Monoglobales	3.07262	M.Normal	2.62925	1.34E-09
d__Bacteria.p__Firmicutes.c__Bacilli.o__Lactobacillales.f__Streptococcaceae	4.64375	F.CRC	4.3023	3.24E-07		d__Bacteria.p__Proteobacteria.c__Gammaproteobacteria.o__Aeromonadales	3.06068	M.Normal	2.47903	0.0260648
d__Bacteria.p__Firmicutes.c__Clostridia.o__Peptostreptococcales_Tissierellales.f__Peptostreptococcaceae	4.48378	F.CRC	4.19473	4.85E-06		d__Bacteria.p__Verrucomicrobiota.c__Lentisphaeria.o__Victivallales	2.71404	M.Normal	2.4055	1.04E-06
d__Bacteria.p__Bacteroidota.c__Bacteroidia.o__Bacteroidales.f__Porphyromonadaceae	4.17015	F.CRC	3.88212	1.53E-28		d__Bacteria.p__Firmicutes.c__Bacilli.o__Izemoplasmatales	2.42378	M.Normal	2.16605	0.00300996
d__Bacteria.p__Campilobacterota.c__Campylobacteria.o__Campylobacterales.f__Campylobacteraceae	4.11701	F.CRC	3.83645	1.47E-11		d__Bacteria.p__Firmicutes.c__Clostridia.o__Peptostreptococcales_Tissierellales.f__Peptostreptococcales_Tissierellales	5.34136	M.CRC	5.05473	4.37E-37
d__Bacteria.p__Actinobacteriota.c__Actinobacteria.o__Corynebacteriales.f__Corynebacteriaceae	4.13222	F.CRC	3.78284	1.05E-79		d__Bacteria.p__Actinobacteriota.c__Actinobacteria.o__Corynebacteriales.f__Corynebacteriaceae	4.75048	M.CRC	4.45431	6.77E-42
d__Bacteria.p__Actinobacteriota.c__Actinobacteria.o__Actinomycetales.f__Actinomycetaceae	3.99885	F.CRC	3.73567	1.10E-22		d__Bacteria.p__Firmicutes.c__Bacilli.o__Staphylococcales.f__Staphylococcaceae	4.52246	M.CRC	4.22998	1.45E-29
d__Bacteria.p__Proteobacteria.c__Gammaproteobacteria.o__Pseudomonadales.f__Pseudomonadaceae	3.90054	F.CRC	3.58037	5.88E-18		d__Bacteria.p__Firmicutes.c__Bacilli.o__Lactobacillales.f__Enterococcaceae	4.58841	M.CRC	4.22933	0.000659576
d__Bacteria.p__Bacteroidota.c__Bacteroidia.o__Sphingobacteriales.f__Sphingobacteriaceae	3.73242	F.CRC	3.37735	1.34E-41		d__Bacteria.p__Firmicutes.c__Bacilli.o__Lactobacillales.f__Streptococcaceae	4.56184	M.CRC	4.18456	1.26E-06
d__Bacteria.p__Actinobacteriota.c__Actinobacteria.o__Corynebacteriales.f__Nocardiaceae	3.70387	F.CRC	3.36308	7.02E-39		d__Bacteria.p__Proteobacteria.c__Gammaproteobacteria.o__Pseudomonadales.f__Pseudomonadaceae	4.49524	M.CRC	4.16887	1.89E-16
d__Bacteria.p__Actinobacteriota.c__Coriobacteriia.o__Coriobacteriales.f__Atopobiaceae	3.54641	F.CRC	3.17421	0.00113697		d__Bacteria.p__Firmicutes.c__Clostridia.o__Peptostreptococcales_Tissierellales.f__Peptostreptococcaceae	4.40128	M.CRC	4.06049	1.13E-07
d__Bacteria.p__Proteobacteria.c__Gammaproteobacteria.o__Burkholderiales.f__Comamonadaceae	3.55019	F.CRC	3.17374	0.0333384		d__Bacteria.p__Bacteroidota.c__Bacteroidia.o__Bacteroidales.f__Porphyromonadaceae	4.33904	M.CRC	4.01396	9.64E-25
d__Bacteria.p__Fusobacteriota.c__Fusobacteriia.o__Fusobacteriales.f__Fusobacteriaceae	3.59472	F.CRC	3.15895	0.000122208		d__Bacteria.p__Actinobacteriota.c__Actinobacteria.o__Bifidobacteriales.f__Bifidobacteriaceae	4.35947	M.CRC	3.88681	0.0115145
d__Bacteria.p__Proteobacteria.c__Gammaproteobacteria.o__Xanthomonadales.f__Xanthomonadaceae	3.48123	F.CRC	3.12359	1.38E-31		d__Bacteria.p__Actinobacteriota.c__Actinobacteria.o__Propionibacteriales.f__Propionibacteriaceae	4.19491	M.CRC	3.86214	1.73E-24
d__Bacteria.p__Firmicutes.c__Bacilli.o__Lactobacillales.f__Carnobacteriaceae	3.28434	F.CRC	3.10186	0.030604		d__Bacteria.p__Actinobacteriota.c__Coriobacteriia.o__Coriobacteriales.f__Coriobacteriaceae	4.08919	M.CRC	3.74277	0.00555243
d__Bacteria.p__Firmicutes.c__Bacilli.o__Erysipelotrichales.f__Erysipelotrichaceae	3.71559	F.CRC	3.01637	0.0136156		d__Bacteria.p__Fusobacteriota.c__Fusobacteriia.o__Fusobacteriales.f__Fusobacteriaceae	4.17783	M.CRC	3.70081	0.000301329
d__Bacteria.p__Actinobacteriota.c__Coriobacteriia.o__Coriobacteriales.f__Coriobacteriaceae	3.56603	F.CRC	2.98416	0.0496808		d__Bacteria.p__Campilobacterota.c__Campylobacteria.o__Campylobacterales.f__Campylobacteraceae	3.81879	M.CRC	3.55784	2.54E-15
d__Bacteria.p__Firmicutes.c__Bacilli.o__Staphylococcales.f__Staphylococcaceae	3.1827	F.CRC	2.88894	1.52E-48		d__Bacteria.p__Bacteroidota.c__Bacteroidia.o__Sphingobacteriales.f__Sphingobacteriaceae	3.78572	M.CRC	3.42719	7.10E-12
d__Bacteria.p__Firmicutes.c__Bacilli.o__Staphylococcales.f__Gemellaceae	3.03354	F.CRC	2.79946	1.02E-05		d__Bacteria.p__Actinobacteriota.c__Actinobacteria.o__Actinomycetales.f__Actinomycetaceae	3.66285	M.CRC	3.4048	1.75E-12
d__Bacteria.p__Proteobacteria.c__Alphaproteobacteria.o__Rhizobiales.f__Rhizobiaceae	3.12553	F.CRC	2.74468	0.00277326		d__Bacteria.p__Firmicutes.c__Clostridia.o__Peptostreptococcales_Tissierellales.f__Anaerovoracaceae	3.69906	M.CRC	3.32989	0.0200037
d__Bacteria.p__Actinobacteriota.c__Actinobacteria.o__Propionibacteriales.f__Propionibacteriaceae	3.03197	F.CRC	2.70233	6.98E-56		d__Bacteria.p__Actinobacteriota.c__Actinobacteria.o__Corynebacteriales.f__Nocardiaceae	3.59307	M.CRC	3.27324	1.11E-11
d__Bacteria.p__Proteobacteria.c__Alphaproteobacteria.o__Rhizobiales.f__Devosiaceae	2.96924	F.CRC	2.61293	3.28E-38		d__Bacteria.p__Proteobacteria.c__Gammaproteobacteria.o__Xanthomonadales.f__Xanthomonadaceae	3.56612	M.CRC	3.20957	7.10E-12
d__Bacteria.p__Firmicutes.c__Clostridia.o__Clostridia.f__Hungateiclostridiaceae	2.77713	F.CRC	2.43542	0.00192909		d__Bacteria.p__Firmicutes.c__Clostridia.o__Clostridia.f__Hungateiclostridiaceae	3.33946	M.CRC	3.05707	3.80E-07
d__Bacteria.p__Proteobacteria.c__Gammaproteobacteria.o__Pseudomonadales.f__Moraxellaceae	2.76951	F.CRC	2.42865	1.75E-06		d__Bacteria.p__Proteobacteria.c__Gammaproteobacteria.o__Burkholderiales.f__Hydrogenophilaceae	3.35429	M.CRC	3.0078	1.83E-06
d__Bacteria.p__Firmicutes.c__Bacilli.o__Lactobacillales.f__Aerococcaceae	2.69198	F.CRC	2.38974	1.92E-18		d__Bacteria.p__Actinobacteriota.c__Coriobacteriia.o__Coriobacteriales.f__Eggerthellaceae	3.29617	M.CRC	2.84041	0.0248292
d__Bacteria.p__Proteobacteria.c__Gammaproteobacteria.o__Aeromonadales.f__Aeromonadaceae	2.73313	F.CRC	2.36903	4.60E-17		d__Bacteria.p__Proteobacteria.c__Gammaproteobacteria.o__Pseudomonadales.f__Moraxellaceae	3.18977	M.CRC	2.7992	0.000320253
d__Bacteria.p__Proteobacteria.c__Gammaproteobacteria.o__Enterobacterales.f__Morganellaceae	2.71026	F.CRC	2.32755	0.0194555		d__Bacteria.p__Actinobacteriota.c__Coriobacteriia.o__Coriobacteriales.f__Atopobiaceae	3.09583	M.CRC	2.75454	0.00152452
d__Bacteria.p__Proteobacteria.c__Alphaproteobacteria.o__Caulobacterales.f__Caulobacteraceae	2.50161	F.CRC	2.1553	1.78E-11		d__Bacteria.p__Firmicutes.c__Bacilli.o__Staphylococcales.f__Gemellaceae	3.06923	M.CRC	2.7482	3.75E-09
d__Bacteria.p__Bacteroidota.c__Bacteroidia.o__Bacteroidales.f__Bacteroidaceae	5.38536	F.Normal	5.04832	5.13E-20		d__Bacteria.p__Firmicutes.c__Bacilli.o__Lactobacillales.f__Carnobacteriaceae	2.96343	M.CRC	2.66292	0.0379513
d__Bacteria.p__Firmicutes.c__Clostridia.o__Oscillospirales.f__Ruminococcaceae	5.24102	F.Normal	4.78843	4.30E-14		d__Bacteria.p__Proteobacteria.c__Alphaproteobacteria.o__Rhizobiales.f__Rhizobiaceae	2.99392	M.CRC	2.64841	0.0130129
d__Bacteria.p__Bacteroidota.c__Bacteroidia.o__Bacteroidales.f__Prevotellaceae	5.22964	F.Normal	4.68153	0.0436431		d__Bacteria.p__Actinobacteriota.c__Actinobacteria.o__Micrococcales.f__Dermabacteraceae	3.00797	M.CRC	2.53762	1.83E-06
d__Bacteria.p__Firmicutes.c__Clostridia.o__Oscillospirales.f__Oscillospiraceae	4.58918	F.Normal	4.08563	3.75E-11		d__Bacteria.p__Proteobacteria.c__Alphaproteobacteria.o__Rhizobiales.f__Devosiaceae	2.85766	M.CRC	2.51416	9.36E-09
d__Bacteria.p__Bacteroidota.c__Bacteroidia.o__Bacteroidales.f__Tannerellaceae	4.32965	F.Normal	4.00183	1.26E-18		d__Bacteria.p__Proteobacteria.c__Gammaproteobacteria.o__Aeromonadales.f__Aeromonadaceae	2.75965	M.CRC	2.40721	5.56E-07
d__Bacteria.p__Bacteroidota.c__Bacteroidia.o__Bacteroidales.f__Rikenellaceae	4.31924	F.Normal	3.9929	3.57E-15		d__Bacteria.p__Proteobacteria.c__Alphaproteobacteria.o__Caulobacterales.f__Caulobacteraceae	2.74213	M.CRC	2.40624	8.34E-11
d__Bacteria.p__Proteobacteria.c__Gammaproteobacteria.o__Burkholderiales.f__Sutterellaceae	4.30471	F.Normal	3.94732	2.92E-14		d__Bacteria.p__Firmicutes.c__Bacilli.o__Lactobacillales.f__Aerococcaceae	2.70849	M.CRC	2.32836	9.81E-05
d__Bacteria.p__Firmicutes.c__Clostridia.o__Oscillospirales.f___Eubacterium__coprostanoligenes_group	4.28486	F.Normal	3.8753	1.36E-09		d__Bacteria.p__Bacteroidota.c__Bacteroidia.o__Flavobacteriales.f__Flavobacteriaceae	2.54279	M.CRC	2.06202	0.0290087
d__Bacteria.p__Firmicutes.c__Negativicutes.o__Acidaminococcales.f__Acidaminococcaceae	4.12072	F.Normal	3.76848	5.77E-07		d__Bacteria.p__Bacteroidota.c__Bacteroidia.o__Bacteroidales.f__Bacteroidaceae	5.32965	M.Normal	5.00384	4.87E-25
d__Bacteria.p__Firmicutes.c__Clostridia.o__Clostridia_UCG_014.f__Clostridia_UCG_014	3.99379	F.Normal	3.65717	1.61E-05		d__Bacteria.p__Bacteroidota.c__Bacteroidia.o__Bacteroidales.f__Prevotellaceae	5.38454	M.Normal	4.87475	2.86E-05
d__Bacteria.p__Firmicutes.c__Clostridia.o__Christensenellales.f__Christensenellaceae	4.02227	F.Normal	3.5647	9.92E-06		d__Bacteria.p__Firmicutes.c__Clostridia.o__Oscillospirales.f__Ruminococcaceae	5.17331	M.Normal	4.67743	1.70E-15
d__Bacteria.p__Firmicutes.c__Bacilli.o__Erysipelotrichales.f__Erysipelatoclostridiaceae	3.91401	F.Normal	3.4899	5.18E-10		d__Bacteria.p__Firmicutes.c__Clostridia.o__Oscillospirales.f__Oscillospiraceae	4.55863	M.Normal	4.04493	1.12E-09
d__Bacteria.p__Bacteroidota.c__Bacteroidia.o__Bacteroidales.f__Muribaculaceae	3.83112	F.Normal	3.48934	0.00548441		d__Bacteria.p__Proteobacteria.c__Gammaproteobacteria.o__Burkholderiales.f__Sutterellaceae	4.38424	M.Normal	4.04058	6.33E-22
d__Bacteria.p__Bacteroidota.c__Bacteroidia.o__Bacteroidales.f__Marinifilaceae	3.65796	F.Normal	3.33356	3.24E-13		d__Bacteria.p__Bacteroidota.c__Bacteroidia.o__Bacteroidales.f__Tannerellaceae	4.25687	M.Normal	3.91524	5.15E-20
d__Bacteria.p__Bacteroidota.c__Bacteroidia.o__Bacteroidales.f__Barnesiellaceae	3.68679	F.Normal	3.29182	5.29E-07		d__Bacteria.p__Bacteroidota.c__Bacteroidia.o__Bacteroidales.f__Rikenellaceae	4.23874	M.Normal	3.91259	1.03E-19
d__Bacteria.p__Verrucomicrobiota.c__Verrucomicrobiae.o__Verrucomicrobiales.f__Akkermansiaceae	3.85051	F.Normal	3.19382	0.0314479		d__Bacteria.p__Firmicutes.c__Clostridia.o__Lachnospirales.f__Lachnospiraceae	5.06149	M.Normal	3.88521	0.00115715
d__Bacteria.p__Firmicutes.c__Clostridia.o__Oscillospirales.f__UCG_010	3.46806	F.Normal	3.14728	4.14E-07		d__Bacteria.p__Firmicutes.c__Clostridia.o__Oscillospirales.f___Eubacterium__coprostanoligenes_group	4.23754	M.Normal	3.78068	6.34E-09
d__Bacteria.p__Proteobacteria.c__Gammaproteobacteria.o__Pasteurellales.f__Pasteurellaceae	3.6548	F.Normal	3.12122	3.82E-05		d__Bacteria.p__Firmicutes.c__Negativicutes.o__Acidaminococcales.f__Acidaminococcaceae	4.05166	M.Normal	3.6569	9.13E-06
d__Bacteria.p__Desulfobacterota.c__Desulfovibrionia.o__Desulfovibrionales.f__Desulfovibrionaceae	3.49025	F.Normal	3.02879	1.72E-06		d__Bacteria.p__Bacteroidota.c__Bacteroidia.o__Bacteroidales.f__Muribaculaceae	3.87846	M.Normal	3.50792	0.00283607
d__Bacteria.p__Firmicutes.c__Clostridia.o__Oscillospirales.f__Butyricicoccaceae	3.48008	F.Normal	2.99591	1.27E-09		d__Bacteria.p__Desulfobacterota.c__Desulfovibrionia.o__Desulfovibrionales.f__Desulfovibrionaceae	3.81121	M.Normal	3.50419	1.22E-07
d__Bacteria.p__Proteobacteria.c__Alphaproteobacteria.o__Rhodospirillales.f__uncultured	3.21954	F.Normal	2.92774	0.041599		d__Bacteria.p__Firmicutes.c__Clostridia.o__Clostridia_UCG_014.f__Clostridia_UCG_014	3.84199	M.Normal	3.48718	4.53E-06
d__Bacteria.p__Firmicutes.c__Clostridia.o__Monoglobales.f__Monoglobaceae	3.20421	F.Normal	2.87499	3.46E-15		d__Bacteria.p__Bacteroidota.c__Bacteroidia.o__Bacteroidales.f__Marinifilaceae	3.61275	M.Normal	3.27969	2.97E-15
d__Bacteria.p__Firmicutes.c__Clostridia.o__Clostridia_vadinBB60_group.f__Clostridia_vadinBB60_group	3.14847	F.Normal	2.76387	3.52E-06		d__Bacteria.p__Firmicutes.c__Clostridia.o__Christensenellales.f__Christensenellaceae	3.77299	M.Normal	3.24392	0.00108659
d__Bacteria.p__Firmicutes.c__Bacilli.o__RF39.f__RF39	3.04711	F.Normal	2.75168	2.16E-07		d__Bacteria.p__Bacteroidota.c__Bacteroidia.o__Bacteroidales.f__Barnesiellaceae	3.55992	M.Normal	3.21744	6.56E-10
d__Bacteria.p__Firmicutes.c__Bacilli.o__Izemoplasmatales.f__Izemoplasmatales	2.65262	F.Normal	2.33527	0.0348391		d__Bacteria.p__Firmicutes.c__Clostridia.o__Oscillospirales.f__UCG_010	3.48801	M.Normal	3.17399	3.06E-07
d__Bacteria.p__Firmicutes.c__Bacilli.o__Lactobacillales.f__Leuconostocaceae	2.64781	F.Normal	2.31873	8.80E-06		d__Bacteria.p__Proteobacteria.c__Gammaproteobacteria.o__Pasteurellales.f__Pasteurellaceae	3.67127	M.Normal	3.12599	7.10E-06
d__Bacteria.p__Verrucomicrobiota.c__Lentisphaeria.o__Victivallales.f__Victivallaceae	2.39966	F.Normal	2.10098	0.00028219		d__Bacteria.p__Firmicutes.c__Clostridia.o__Oscillospirales.f__Butyricicoccaceae	3.49311	M.Normal	3.05264	2.10E-13
d__Bacteria.p__Firmicutes.c__Bacilli.o__Lactobacillales.f__Enterococcaceae.g__Enterococcus	5.04258	F.CRC	4.70205	1.86E-07		d__Bacteria.p__Firmicutes.c__Bacilli.o__Erysipelotrichales.f__Erysipelotrichaceae	3.6992	M.Normal	3.04958	0.000450182
d__Bacteria.p__Proteobacteria.c__Gammaproteobacteria.o__Enterobacterales.f__Enterobacteriaceae.g__Escherichia_Shigella	4.88737	F.CRC	4.53835	0.00579107		d__Bacteria.p__Firmicutes.c__Bacilli.o__Erysipelotrichales.f__Erysipelatoclostridiaceae	3.71845	M.Normal	2.97162	1.72E-09
d__Bacteria.p__Firmicutes.c__Clostridia.o__Peptostreptococcales_Tissierellales.f__Peptostreptococcales_Tissierellales.g__Finegoldia	4.81763	F.CRC	4.5296	2.23E-98		d__Bacteria.p__Firmicutes.c__Clostridia.o__Clostridia_vadinBB60_group.f__Clostridia_vadinBB60_group	3.15119	M.Normal	2.80966	4.29E-06
d__Bacteria.p__Firmicutes.c__Clostridia.o__Peptostreptococcales_Tissierellales.f__Peptostreptococcales_Tissierellales.g__Peptoniphilus	4.69075	F.CRC	4.40753	1.51E-54		d__Bacteria.p__Firmicutes.c__Bacilli.o__RF39.f__RF39	2.98019	M.Normal	2.66866	6.02E-08
d__Bacteria.p__Firmicutes.c__Bacilli.o__Lactobacillales.f__Streptococcaceae.g__Streptococcus	4.64287	F.CRC	4.30273	2.03E-07		d__Bacteria.p__Firmicutes.c__Clostridia.o__Monoglobales.f__Monoglobaceae	3.07262	M.Normal	2.63555	1.34E-09
d__Bacteria.p__Firmicutes.c__Clostridia.o__Peptostreptococcales_Tissierellales.f__Peptostreptococcales_Tissierellales.g__Anaerococcus	4.45534	F.CRC	4.18131	1.10E-84		d__Bacteria.p__Verrucomicrobiota.c__Lentisphaeria.o__Victivallales.f__Victivallaceae	2.60156	M.Normal	2.3177	1.79E-06
d__Bacteria.p__Firmicutes.c__Clostridia.o__Peptostreptococcales_Tissierellales.f__Peptostreptococcales_Tissierellales.g__Ezakiella	4.39834	F.CRC	4.10745	2.83E-28		d__Bacteria.p__Firmicutes.c__Bacilli.o__Lactobacillales.f__Leuconostocaceae	2.67938	M.Normal	2.17963	0.000125971
d__Bacteria.p__Firmicutes.c__Clostridia.o__Peptostreptococcales_Tissierellales.f__Peptostreptococcales_Tissierellales.g__Fenollaria	4.36558	F.CRC	4.06601	5.41E-24		d__Bacteria.p__Firmicutes.c__Bacilli.o__Izemoplasmatales.f__Izemoplasmatales	2.42378	M.Normal	2.16535	0.00300996
d__Bacteria.p__Actinobacteriota.c__Actinobacteria.o__Bifidobacteriales.f__Bifidobacteriaceae.g__Gardnerella	4.40157	F.CRC	4.01367	2.07E-11		d__Bacteria.p__Firmicutes.c__Clostridia.o__Peptostreptococcales_Tissierellales.f__Peptostreptococcales_Tissierellales.g__Finegoldia	5.02434	M.CRC	4.73021	1.47E-41
d__Bacteria.p__Firmicutes.c__Clostridia.o__Peptostreptococcales_Tissierellales.f__Peptostreptococcaceae.g__Peptostreptococcus	4.20092	F.CRC	3.97821	5.63E-20		d__Bacteria.p__Actinobacteriota.c__Actinobacteria.o__Corynebacteriales.f__Corynebacteriaceae.g__Corynebacterium	4.71215	M.CRC	4.41649	7.98E-40
d__Bacteria.p__Actinobacteriota.c__Actinobacteria.o__Bifidobacteriales.f__Bifidobacteriaceae.g__Bifidobacterium	4.50901	F.CRC	3.96543	0.0241323		d__Bacteria.p__Firmicutes.c__Clostridia.o__Peptostreptococcales_Tissierellales.f__Peptostreptococcales_Tissierellales.g__Peptoniphilus	4.65926	M.CRC	4.3777	4.05E-38
d__Bacteria.p__Bacteroidota.c__Bacteroidia.o__Bacteroidales.f__Porphyromonadaceae.g__Porphyromonas	4.17015	F.CRC	3.88213	1.53E-28		d__Bacteria.p__Firmicutes.c__Bacilli.o__Staphylococcales.f__Staphylococcaceae.g__Staphylococcus	4.52246	M.CRC	4.22998	1.45E-29
d__Bacteria.p__Campilobacterota.c__Campylobacteria.o__Campylobacterales.f__Campylobacteraceae.g__Campylobacter	4.11701	F.CRC	3.83647	1.47E-11		d__Bacteria.p__Firmicutes.c__Bacilli.o__Lactobacillales.f__Enterococcaceae.g__Enterococcus	4.58841	M.CRC	4.20633	0.000659576
d__Bacteria.p__Actinobacteriota.c__Actinobacteria.o__Corynebacteriales.f__Corynebacteriaceae.g__Corynebacterium	4.05929	F.CRC	3.68424	3.27E-81		d__Bacteria.p__Firmicutes.c__Bacilli.o__Lactobacillales.f__Streptococcaceae.g__Streptococcus	4.55751	M.CRC	4.18201	5.98E-07
d__Bacteria.p__Firmicutes.c__Clostridia.o__Peptostreptococcales_Tissierellales.f__Peptostreptococcales_Tissierellales.g__Parvimonas	3.87243	F.CRC	3.67748	8.21E-37		d__Bacteria.p__Proteobacteria.c__Gammaproteobacteria.o__Pseudomonadales.f__Pseudomonadaceae.g__Pseudomonas	4.49524	M.CRC	4.16888	1.89E-16
d__Bacteria.p__Actinobacteriota.c__Actinobacteria.o__Actinomycetales.f__Actinomycetaceae.g__Actinomyces	3.86597	F.CRC	3.61382	5.24E-19		d__Bacteria.p__Firmicutes.c__Clostridia.o__Peptostreptococcales_Tissierellales.f__Peptostreptococcales_Tissierellales.g__Anaerococcus	4.43246	M.CRC	4.15351	6.77E-42
d__Bacteria.p__Proteobacteria.c__Gammaproteobacteria.o__Pseudomonadales.f__Pseudomonadaceae.g__Pseudomonas	3.90054	F.CRC	3.58042	5.88E-18		d__Bacteria.p__Firmicutes.c__Clostridia.o__Lachnospirales.f__Lachnospiraceae.g__Blautia	4.47553	M.CRC	4.08037	0.0143484
d__Bacteria.p__Firmicutes.c__Clostridia.o__Peptostreptococcales_Tissierellales.f__Peptostreptococcales_Tissierellales.g__Murdochiella	3.85673	F.CRC	3.57541	5.80E-31		d__Bacteria.p__Bacteroidota.c__Bacteroidia.o__Bacteroidales.f__Porphyromonadaceae.g__Porphyromonas	4.33904	M.CRC	4.01396	9.64E-25
d__Bacteria.p__Firmicutes.c__Clostridia.o__Peptostreptococcales_Tissierellales.f__Anaerovoracaceae.g__S5_A14a	3.77991	F.CRC	3.50242	7.91E-52		d__Bacteria.p__Firmicutes.c__Clostridia.o__Peptostreptococcales_Tissierellales.f__Peptostreptococcales_Tissierellales.g__Fenollaria	4.25486	M.CRC	3.98814	4.18E-22
d__Bacteria.p__Bacteroidota.c__Bacteroidia.o__Sphingobacteriales.f__Sphingobacteriaceae.g__Sphingobacterium	3.7288	F.CRC	3.38441	1.34E-41		d__Bacteria.p__Actinobacteriota.c__Actinobacteria.o__Propionibacteriales.f__Propionibacteriaceae.g__Cutibacterium	4.1946	M.CRC	3.86178	1.39E-23
d__Bacteria.p__Actinobacteriota.c__Actinobacteria.o__Corynebacteriales.f__Nocardiaceae.g__Rhodococcus	3.70387	F.CRC	3.33846	7.02E-39		d__Bacteria.p__Firmicutes.c__Clostridia.o__Peptostreptococcales_Tissierellales.f__Peptostreptococcales_Tissierellales.g__Ezakiella	4.05793	M.CRC	3.76495	5.53E-19
d__Bacteria.p__Firmicutes.c__Clostridia.o__Lachnospirales.f__Lachnospiraceae.g__Roseburia	3.84387	F.CRC	3.19316	1.46E-08		d__Bacteria.p__Actinobacteriota.c__Actinobacteria.o__Bifidobacteriales.f__Bifidobacteriaceae.g__Bifidobacterium	4.25938	M.CRC	3.74928	0.00189512
d__Bacteria.p__Fusobacteriota.c__Fusobacteriia.o__Fusobacteriales.f__Fusobacteriaceae.g__Fusobacterium	3.59472	F.CRC	3.18269	9.13E-05		d__Bacteria.p__Actinobacteriota.c__Coriobacteriia.o__Coriobacteriales.f__Coriobacteriaceae.g__Collinsella	4.08919	M.CRC	3.74279	0.00515212
d__Bacteria.p__Proteobacteria.c__Gammaproteobacteria.o__Burkholderiales.f__Comamonadaceae.g__Delftia	3.53216	F.CRC	3.17384	6.40E-07		d__Bacteria.p__Fusobacteriota.c__Fusobacteriia.o__Fusobacteriales.f__Fusobacteriaceae.g__Fusobacterium	4.17783	M.CRC	3.69984	0.000301329
d__Bacteria.p__Firmicutes.c__Clostridia.o__Lachnospirales.f__Lachnospiraceae.g__Fusicatenibacter	3.78073	F.CRC	3.17291	0.0011661		d__Bacteria.p__Firmicutes.c__Clostridia.o__Lachnospirales.f__Lachnospiraceae.g___Ruminococcus__torques_group	4.07362	M.CRC	3.67963	0.00958521
d__Bacteria.p__Actinobacteriota.c__Coriobacteriia.o__Coriobacteriales.f__Atopobiaceae.g__Atopobium	3.53302	F.CRC	3.1543	2.95E-10		d__Bacteria.p__Firmicutes.c__Clostridia.o__Peptostreptococcales_Tissierellales.f__Peptostreptococcaceae.g__Peptostreptococcus	3.94143	M.CRC	3.62302	8.85E-16
d__Bacteria.p__Proteobacteria.c__Gammaproteobacteria.o__Xanthomonadales.f__Xanthomonadaceae.g__Stenotrophomonas	3.48123	F.CRC	3.10481	1.38E-31		d__Bacteria.p__Firmicutes.c__Clostridia.o__Peptostreptococcales_Tissierellales.f__Peptostreptococcales_Tissierellales.g__Murdochiella	3.86452	M.CRC	3.59225	3.87E-22
d__Bacteria.p__Firmicutes.c__Clostridia.o__Peptostreptococcales_Tissierellales.f__Peptostreptococcales_Tissierellales.g__Gallicola	3.3009	F.CRC	3.01203	7.83E-35		d__Bacteria.p__Campilobacterota.c__Campylobacteria.o__Campylobacterales.f__Campylobacteraceae.g__Campylobacter	3.81879	M.CRC	3.55795	2.54E-15
d__Bacteria.p__Actinobacteriota.c__Coriobacteriia.o__Coriobacteriales.f__Coriobacteriaceae.g__Collinsella	3.56272	F.CRC	2.97399	0.0302469		d__Bacteria.p__Firmicutes.c__Clostridia.o__Lachnospirales.f__Lachnospiraceae.g__Dorea	3.88803	M.CRC	3.46681	0.00132545
d__Bacteria.p__Actinobacteriota.c__Actinobacteria.o__Corynebacteriales.f__Corynebacteriaceae.g__Lawsonella	3.14724	F.CRC	2.91622	1.20E-45		d__Bacteria.p__Bacteroidota.c__Bacteroidia.o__Sphingobacteriales.f__Sphingobacteriaceae.g__Sphingobacterium	3.78325	M.CRC	3.42994	7.10E-12
d__Bacteria.p__Firmicutes.c__Bacilli.o__Staphylococcales.f__Staphylococcaceae.g__Staphylococcus	3.1827	F.CRC	2.8727	1.52E-48		d__Bacteria.p__Firmicutes.c__Clostridia.o__Peptostreptococcales_Tissierellales.f__Anaerovoracaceae.g__S5_A14a	3.581	M.CRC	3.30816	1.04E-22
d__Bacteria.p__Actinobacteriota.c__Actinobacteria.o__Actinomycetales.f__Actinomycetaceae.g__Mobiluncus	3.15718	F.CRC	2.86511	2.07E-11		d__Bacteria.p__Actinobacteriota.c__Actinobacteria.o__Corynebacteriales.f__Nocardiaceae.g__Rhodococcus	3.59307	M.CRC	3.28248	1.11E-11
d__Bacteria.p__Firmicutes.c__Bacilli.o__Staphylococcales.f__Gemellaceae.g__Gemella	3.03354	F.CRC	2.76725	1.02E-05		d__Bacteria.p__Actinobacteriota.c__Actinobacteria.o__Corynebacteriales.f__Corynebacteriaceae.g__Lawsonella	3.56677	M.CRC	3.28246	2.98E-19
d__Bacteria.p__Firmicutes.c__Clostridia.o__Peptococcales.f__Peptococcaceae.g__Peptococcus	3.07207	F.CRC	2.76692	0.0258962		d__Bacteria.p__Actinobacteriota.c__Actinobacteria.o__Bifidobacteriales.f__Bifidobacteriaceae.g__Alloscardovia	3.63439	M.CRC	3.27738	0.000534782
d__Bacteria.p__Actinobacteriota.c__Actinobacteria.o__Propionibacteriales.f__Propionibacteriaceae.g__Cutibacterium	3.03197	F.CRC	2.70233	6.98E-56		d__Bacteria.p__Firmicutes.c__Clostridia.o__Peptostreptococcales_Tissierellales.f__Peptostreptococcales_Tissierellales.g__Parvimonas	3.54517	M.CRC	3.25793	3.46E-19
d__Bacteria.p__Firmicutes.c__Clostridia.o__Lachnospirales.f__Lachnospiraceae.g__Cellulosilyticum	2.93441	F.CRC	2.69587	0.041825		d__Bacteria.p__Proteobacteria.c__Gammaproteobacteria.o__Xanthomonadales.f__Xanthomonadaceae.g__Stenotrophomonas	3.54605	M.CRC	3.20723	2.64E-10
d__Bacteria.p__Actinobacteriota.c__Actinobacteria.o__Bifidobacteriales.f__Bifidobacteriaceae.g__Alloscardovia	3.03237	F.CRC	2.6816	7.04E-10		d__Bacteria.p__Proteobacteria.c__Gammaproteobacteria.o__Burkholderiales.f__Comamonadaceae.g__Delftia	3.5642	M.CRC	3.1984	0.0014227
d__Bacteria.p__Actinobacteriota.c__Actinobacteria.o__Corynebacteriales.f__Corynebacteriaceae.g__Corynebacteriaceae	2.83754	F.CRC	2.62905	0.000112508		d__Bacteria.p__Firmicutes.c__Bacilli.o__Erysipelotrichales.f__Erysipelotrichaceae.g__Turicibacter	3.3301	M.CRC	3.11761	0.00611906
d__Bacteria.p__Actinobacteriota.c__Actinobacteria.o__Actinomycetales.f__Actinomycetaceae.g__Varibaculum	2.89737	F.CRC	2.60963	2.50E-38		d__Bacteria.p__Firmicutes.c__Clostridia.o__Clostridia.f__Hungateiclostridiaceae.g__Fastidiosipila	3.33946	M.CRC	3.07456	1.07E-11
d__Bacteria.p__Proteobacteria.c__Alphaproteobacteria.o__Rhizobiales.f__Devosiaceae.g__Devosia	2.96924	F.CRC	2.60872	3.28E-38		d__Bacteria.p__Actinobacteriota.c__Actinobacteria.o__Actinomycetales.f__Actinomycetaceae.g__Actinomyces	3.3379	M.CRC	3.06433	5.26E-07
d__Bacteria.p__Firmicutes.c__Negativicutes.o__Veillonellales_Selenomonadales.f__Veillonellaceae.g__Negativicoccus	2.85991	F.CRC	2.58588	1.01E-41		d__Bacteria.p__Proteobacteria.c__Gammaproteobacteria.o__Burkholderiales.f__Hydrogenophilaceae.g__Hydrogenophilus	3.35429	M.CRC	3.04221	1.83E-06
d__Bacteria.p__Firmicutes.c__Clostridia.o__Peptostreptococcales_Tissierellales.f__Peptostreptococcales_Tissierellales.g__W5053	2.78807	F.CRC	2.48569	2.05E-21		d__Bacteria.p__Actinobacteriota.c__Actinobacteria.o__Actinomycetales.f__Actinomycetaceae.g__Mobiluncus	3.27003	M.CRC	3.01629	2.64E-10
d__Bacteria.p__Firmicutes.c__Clostridia.o__Clostridia.f__Hungateiclostridiaceae.g__Fastidiosipila	2.75576	F.CRC	2.46156	2.83E-18		d__Bacteria.p__Firmicutes.c__Negativicutes.o__Veillonellales_Selenomonadales.f__Veillonellaceae.g__Anaeroglobus	3.21245	M.CRC	2.76582	0.0155187
d__Bacteria.p__Proteobacteria.c__Alphaproteobacteria.o__Rhizobiales.f__Rhizobiaceae.g__Ensifer	2.78779	F.CRC	2.44181	4.17E-28		d__Bacteria.p__Firmicutes.c__Bacilli.o__Staphylococcales.f__Gemellaceae.g__Gemella	3.06923	M.CRC	2.75229	3.75E-09
d__Bacteria.p__Proteobacteria.c__Alphaproteobacteria.o__Rhizobiales.f__Rhizobiaceae.g__Pseudochrobactrum	2.79665	F.CRC	2.43965	9.33E-25		d__Bacteria.p__Firmicutes.c__Clostridia.o__Peptococcales.f__Peptococcaceae.g__Peptococcus	3.01303	M.CRC	2.67179	0.0385727
d__Bacteria.p__Firmicutes.c__Bacilli.o__Erysipelotrichales.f__Erysipelotrichaceae.g__Solobacterium	2.6866	F.CRC	2.41217	1.35E-08		d__Bacteria.p__Proteobacteria.c__Gammaproteobacteria.o__Pseudomonadales.f__Moraxellaceae.g__Acinetobacter	3.02412	M.CRC	2.62335	0.0192748
d__Bacteria.p__Firmicutes.c__Bacilli.o__Lactobacillales.f__Aerococcaceae.g__Facklamia	2.68811	F.CRC	2.36943	9.33E-25		d__Bacteria.p__Firmicutes.c__Clostridia.o__Lachnospirales.f__Lachnospiraceae.g__Tyzzerella	3.06206	M.CRC	2.58066	0.000221087
d__Bacteria.p__Proteobacteria.c__Gammaproteobacteria.o__Aeromonadales.f__Aeromonadaceae.g__Aeromonas	2.73313	F.CRC	2.36654	4.60E-17		d__Bacteria.p__Actinobacteriota.c__Coriobacteriia.o__Coriobacteriales.f__Atopobiaceae.g__Atopobium	2.84308	M.CRC	2.55749	0.00213954
d__Bacteria.p__Proteobacteria.c__Gammaproteobacteria.o__Enterobacterales.f__Morganellaceae.g__Morganella	2.70704	F.CRC	2.35453	0.00620734		d__Bacteria.p__Actinobacteriota.c__Actinobacteria.o__Micrococcales.f__Dermabacteraceae.g__Dermabacter	2.99347	M.CRC	2.53348	1.83E-06
d__Bacteria.p__Proteobacteria.c__Gammaproteobacteria.o__Pseudomonadales.f__Moraxellaceae.g__Psychrobacter	2.66679	F.CRC	2.30771	3.08E-28		d__Bacteria.p__Proteobacteria.c__Alphaproteobacteria.o__Rhizobiales.f__Devosiaceae.g__Devosia	2.85766	M.CRC	2.52108	9.36E-09
d__Bacteria.p__Firmicutes.c__Clostridia.o__Clostridiales.f__Clostridiaceae.g__Clostridium_sensu_stricto_6	2.62739	F.CRC	2.23975	0.000112508		d__Bacteria.p__Synergistota.c__Synergistia.o__Synergistales.f__Synergistaceae.g__Pyramidobacter	2.80589	M.CRC	2.46906	0.0164056
d__Bacteria.p__Firmicutes.c__Clostridia.o__Lachnospirales.f__Lachnospiraceae.g__Frisingicoccus	2.43982	F.CRC	2.15136	0.00136425		d__Bacteria.p__Firmicutes.c__Negativicutes.o__Veillonellales_Selenomonadales.f__Veillonellaceae.g__Negativicoccus	2.65931	M.CRC	2.40019	2.82E-14
d__Bacteria.p__Proteobacteria.c__Alphaproteobacteria.o__Caulobacterales.f__Caulobacteraceae.g__Brevundimonas	2.50161	F.CRC	2.14303	1.78E-11		d__Bacteria.p__Proteobacteria.c__Gammaproteobacteria.o__Aeromonadales.f__Aeromonadaceae.g__Aeromonas	2.75965	M.CRC	2.39684	5.56E-07
d__Bacteria.p__Firmicutes.c__Clostridia.o__Peptostreptococcales_Tissierellales.f__Peptostreptococcaceae.g__Clostridioides	2.36987	F.CRC	2.06277	4.59E-08		d__Bacteria.p__Actinobacteriota.c__Actinobacteria.o__Actinomycetales.f__Actinomycetaceae.g__Varibaculum	2.60047	M.CRC	2.35883	2.64E-10
d__Bacteria.p__Firmicutes.c__Clostridia.o__Lachnospirales.f__Lachnospiraceae.g__Moryella	2.48547	F.CRC	2.01462	0.000136394		d__Bacteria.p__Proteobacteria.c__Alphaproteobacteria.o__Rhizobiales.f__Rhizobiaceae.g__Pseudochrobactrum	2.68092	M.CRC	2.34897	5.48E-08
d__Bacteria.p__Bacteroidota.c__Bacteroidia.o__Bacteroidales.f__Bacteroidaceae.g__Bacteroides	5.38536	F.Normal	5.04832	5.13E-20		d__Bacteria.p__Proteobacteria.c__Gammaproteobacteria.o__Pseudomonadales.f__Moraxellaceae.g__Psychrobacter	2.64271	M.CRC	2.31613	9.36E-09
d__Bacteria.p__Firmicutes.c__Clostridia.o__Oscillospirales.f__Ruminococcaceae.g__Faecalibacterium	5.12145	F.Normal	4.68837	4.80E-14		d__Bacteria.p__Firmicutes.c__Clostridia.o__Peptostreptococcales_Tissierellales.f__Peptostreptococcaceae.g__Filifactor	2.76203	M.CRC	2.30951	0.00196166
d__Bacteria.p__Bacteroidota.c__Bacteroidia.o__Bacteroidales.f__Tannerellaceae.g__Parabacteroides	4.32965	F.Normal	4.00186	1.26E-18		d__Bacteria.p__Proteobacteria.c__Alphaproteobacteria.o__Rhizobiales.f__Rhizobiaceae.g__Ensifer	2.61203	M.CRC	2.2866	3.18E-07
d__Bacteria.p__Bacteroidota.c__Bacteroidia.o__Bacteroidales.f__Rikenellaceae.g__Alistipes	4.27111	F.Normal	3.93991	1.81E-14		d__Bacteria.p__Firmicutes.c__Clostridia.o__Peptostreptococcales_Tissierellales.f__Peptostreptococcales_Tissierellales.g__W5053	2.57863	M.CRC	2.27509	5.48E-08
d__Bacteria.p__Firmicutes.c__Clostridia.o__Oscillospirales.f___Eubacterium__coprostanoligenes_group.g___Eubacterium__coprostanoligenes_group	4.28486	F.Normal	3.8753	1.36E-09		d__Bacteria.p__Actinobacteriota.c__Coriobacteriia.o__Coriobacteriales.f__Atopobiaceae.g__Olsenella	2.71468	M.CRC	2.25422	0.045391
d__Bacteria.p__Proteobacteria.c__Gammaproteobacteria.o__Burkholderiales.f__Sutterellaceae.g__Sutterella	4.18322	F.Normal	3.81603	6.62E-08		d__Bacteria.p__Proteobacteria.c__Alphaproteobacteria.o__Caulobacterales.f__Caulobacteraceae.g__Brevundimonas	2.60343	M.CRC	2.24675	1.87E-08
d__Bacteria.p__Firmicutes.c__Negativicutes.o__Acidaminococcales.f__Acidaminococcaceae.g__Phascolarctobacterium	4.09674	F.Normal	3.76712	4.94E-08		d__Bacteria.p__Actinobacteriota.c__Coriobacteriia.o__Coriobacteriales.f__Eggerthellaceae.g__Adlercreutzia	2.68177	M.CRC	2.23521	0.00636964
d__Bacteria.p__Firmicutes.c__Clostridia.o__Lachnospirales.f__Lachnospiraceae.g__Lachnospira	4.12243	F.Normal	3.75861	3.10E-14		d__Bacteria.p__Firmicutes.c__Clostridia.o__Peptostreptococcales_Tissierellales.f__Peptostreptococcales_Tissierellales.g__Gallicola	2.57802	M.CRC	2.22885	2.64E-10
d__Bacteria.p__Firmicutes.c__Clostridia.o__Lachnospirales.f__Lachnospiraceae.g__Lachnospiraceae_NK4A136_group	4.16632	F.Normal	3.74253	9.72E-13		d__Bacteria.p__Firmicutes.c__Clostridia.o__Oscillospirales.f__Ruminococcaceae.g__Incertae_Sedis	2.92058	M.CRC	2.17001	0.0112918
d__Bacteria.p__Firmicutes.c__Clostridia.o__Clostridia_UCG_014.f__Clostridia_UCG_014.g__Clostridia_UCG_014	3.99379	F.Normal	3.65649	1.61E-05		d__Bacteria.p__Firmicutes.c__Clostridia.o__Oscillospirales.f__Oscillospiraceae.g__uncultured	3.03144	M.CRC	2.13845	0.0164069
d__Bacteria.p__Firmicutes.c__Clostridia.o__Oscillospirales.f__Ruminococcaceae.g__Subdoligranulum	4.11295	F.Normal	3.60369	2.21E-07		d__Bacteria.p__Firmicutes.c__Bacilli.o__Lactobacillales.f__Aerococcaceae.g__Facklamia	2.40226	M.CRC	2.09288	0.000339774
d__Bacteria.p__Firmicutes.c__Clostridia.o__Oscillospirales.f__Ruminococcaceae.g__Ruminococcus	4.17533	F.Normal	3.59919	3.78E-05		d__Bacteria.p__Bacteroidota.c__Bacteroidia.o__Bacteroidales.f__Bacteroidaceae.g__Bacteroides	5.32965	M.Normal	5.00384	4.87E-25
d__Bacteria.p__Firmicutes.c__Clostridia.o__Christensenellales.f__Christensenellaceae.g__Christensenellaceae_R_7_group	4.01207	F.Normal	3.55525	1.92E-05		d__Bacteria.p__Bacteroidota.c__Bacteroidia.o__Bacteroidales.f__Prevotellaceae.g__Prevotella	5.3291	M.Normal	4.808	0.00144382
d__Bacteria.p__Proteobacteria.c__Gammaproteobacteria.o__Enterobacterales.f__Enterobacteriaceae.g__Klebsiella	3.93883	F.Normal	3.55421	0.0151339		d__Bacteria.p__Firmicutes.c__Clostridia.o__Oscillospirales.f__Ruminococcaceae.g__Faecalibacterium	5.06564	M.Normal	4.60192	8.35E-17
d__Bacteria.p__Firmicutes.c__Clostridia.o__Lachnospirales.f__Lachnospiraceae.g__Lachnoclostridium	4.03848	F.Normal	3.53818	5.98E-08		d__Bacteria.p__Proteobacteria.c__Gammaproteobacteria.o__Burkholderiales.f__Sutterellaceae.g__Sutterella	4.32733	M.Normal	3.98809	1.24E-16
d__Bacteria.p__Firmicutes.c__Clostridia.o__Oscillospirales.f__Oscillospiraceae.g__UCG_002	4.18241	F.Normal	3.53477	5.54E-06		d__Bacteria.p__Bacteroidota.c__Bacteroidia.o__Bacteroidales.f__Tannerellaceae.g__Parabacteroides	4.25686	M.Normal	3.91713	2.26E-20
d__Bacteria.p__Bacteroidota.c__Bacteroidia.o__Bacteroidales.f__Prevotellaceae.g__Paraprevotella	3.79061	F.Normal	3.46868	7.63E-08		d__Bacteria.p__Firmicutes.c__Clostridia.o__Lachnospirales.f__Lachnospiraceae.g__Lachnospiraceae_NK4A136_group	4.19246	M.Normal	3.8351	5.47E-16
d__Bacteria.p__Bacteroidota.c__Bacteroidia.o__Bacteroidales.f__Muribaculaceae.g__Muribaculaceae	3.81161	F.Normal	3.45564	0.00366192		d__Bacteria.p__Bacteroidota.c__Bacteroidia.o__Bacteroidales.f__Rikenellaceae.g__Alistipes	4.16073	M.Normal	3.83035	5.24E-19
d__Bacteria.p__Firmicutes.c__Clostridia.o__Oscillospirales.f__Oscillospiraceae.g__UCG_005	3.8702	F.Normal	3.42323	4.15E-07		d__Bacteria.p__Firmicutes.c__Clostridia.o__Lachnospirales.f__Lachnospiraceae.g__Lachnospira	4.1244	M.Normal	3.78431	4.12E-20
d__Bacteria.p__Firmicutes.c__Clostridia.o__Lachnospirales.f__Lachnospiraceae.g__Agathobacter	3.90605	F.Normal	3.3731	5.68E-09		d__Bacteria.p__Firmicutes.c__Clostridia.o__Oscillospirales.f___Eubacterium__coprostanoligenes_group.g___Eubacterium__coprostanoligenes_group	4.23754	M.Normal	3.78068	6.34E-09
d__Bacteria.p__Proteobacteria.c__Gammaproteobacteria.o__Burkholderiales.f__Sutterellaceae.g__Parasutterella	3.69215	F.Normal	3.36241	2.09E-07		d__Bacteria.p__Proteobacteria.c__Gammaproteobacteria.o__Enterobacterales.f__Enterobacteriaceae.g__Klebsiella	4.12333	M.Normal	3.7607	0.000453185
d__Bacteria.p__Firmicutes.c__Clostridia.o__Lachnospirales.f__Lachnospiraceae.g___Eubacterium__ruminantium_group	3.69742	F.Normal	3.36031	4.06E-05		d__Bacteria.p__Firmicutes.c__Negativicutes.o__Acidaminococcales.f__Acidaminococcaceae.g__Phascolarctobacterium	4.00364	M.Normal	3.61666	2.93E-05
d__Bacteria.p__Firmicutes.c__Clostridia.o__Lachnospirales.f__Lachnospiraceae.g__Lachnospiraceae_UCG_001	3.59649	F.Normal	3.29033	1.25E-11		d__Bacteria.p__Firmicutes.c__Clostridia.o__Oscillospirales.f__Ruminococcaceae.g__Ruminococcus	4.02098	M.Normal	3.55226	1.01E-06
d__Bacteria.p__Firmicutes.c__Clostridia.o__Oscillospirales.f__Oscillospiraceae.g__NK4A214_group	3.65458	F.Normal	3.24658	1.15E-07		d__Bacteria.p__Bacteroidota.c__Bacteroidia.o__Bacteroidales.f__Prevotellaceae.g__Paraprevotella	3.84	M.Normal	3.54748	1.90E-09
d__Bacteria.p__Firmicutes.c__Clostridia.o__Oscillospirales.f__Oscillospiraceae.g__UCG_003	3.61547	F.Normal	3.24447	6.61E-13		d__Bacteria.p__Firmicutes.c__Clostridia.o__Oscillospirales.f__Oscillospiraceae.g__UCG_002	4.16599	M.Normal	3.50908	0.000520441
d__Bacteria.p__Firmicutes.c__Clostridia.o__Lachnospirales.f__Lachnospiraceae.g___Eubacterium__eligens_group	3.72867	F.Normal	3.22249	1.44E-08		d__Bacteria.p__Bacteroidota.c__Bacteroidia.o__Bacteroidales.f__Muribaculaceae.g__Muribaculaceae	3.85361	M.Normal	3.49435	0.00253765
d__Bacteria.p__Firmicutes.c__Clostridia.o__Oscillospirales.f__Ruminococcaceae.g___Eubacterium__siraeum_group	3.56482	F.Normal	3.2216	9.84E-05		d__Bacteria.p__Firmicutes.c__Clostridia.o__Clostridia_UCG_014.f__Clostridia_UCG_014.g__Clostridia_UCG_014	3.84199	M.Normal	3.48861	4.53E-06
d__Bacteria.p__Verrucomicrobiota.c__Verrucomicrobiae.o__Verrucomicrobiales.f__Akkermansiaceae.g__Akkermansia	3.85051	F.Normal	3.20699	0.0314479		d__Bacteria.p__Firmicutes.c__Clostridia.o__Lachnospirales.f__Lachnospiraceae.g__Lachnoclostridium	3.97919	M.Normal	3.4403	4.25E-12
d__Bacteria.p__Bacteroidota.c__Bacteroidia.o__Bacteroidales.f__Barnesiellaceae.g__Barnesiella	3.60467	F.Normal	3.19211	2.20E-05		d__Bacteria.p__Firmicutes.c__Clostridia.o__Oscillospirales.f__Oscillospiraceae.g__UCG_005	3.83931	M.Normal	3.35624	2.74E-05
d__Bacteria.p__Firmicutes.c__Clostridia.o__Oscillospirales.f__Ruminococcaceae.g__uncultured	3.5057	F.Normal	3.16544	1.79E-12		d__Bacteria.p__Firmicutes.c__Clostridia.o__Lachnospirales.f__Lachnospiraceae.g__Roseburia	3.82798	M.Normal	3.25002	1.22E-12
d__Bacteria.p__Firmicutes.c__Clostridia.o__Oscillospirales.f__UCG_010.g__UCG_010	3.46806	F.Normal	3.14662	4.14E-07		d__Bacteria.p__Firmicutes.c__Clostridia.o__Lachnospirales.f__Lachnospiraceae.g___Eubacterium__ruminantium_group	3.606	M.Normal	3.24848	9.69E-06
d__Bacteria.p__Firmicutes.c__Clostridia.o__Lachnospirales.f__Lachnospiraceae.g__Coprococcus	3.922	F.Normal	3.12374	0.0402405		d__Bacteria.p__Firmicutes.c__Clostridia.o__Oscillospirales.f__Oscillospiraceae.g__NK4A214_group	3.59854	M.Normal	3.23658	1.71E-08
d__Bacteria.p__Proteobacteria.c__Gammaproteobacteria.o__Pasteurellales.f__Pasteurellaceae.g__Haemophilus	3.64905	F.Normal	3.12141	1.60E-05		d__Bacteria.p__Firmicutes.c__Clostridia.o__Christensenellales.f__Christensenellaceae.g__Christensenellaceae_R_7_group	3.76477	M.Normal	3.23108	0.00122735
d__Bacteria.p__Bacteroidota.c__Bacteroidia.o__Bacteroidales.f__Marinifilaceae.g__Odoribacter	3.41992	F.Normal	3.1014	6.17E-11		d__Bacteria.p__Firmicutes.c__Clostridia.o__Lachnospirales.f__Lachnospiraceae.g___Eubacterium__eligens_group	3.6158	M.Normal	3.22528	1.25E-11
d__Bacteria.p__Firmicutes.c__Clostridia.o__Oscillospirales.f__Oscillospiraceae.g__Oscillibacter	3.33462	F.Normal	3.00077	1.04E-13		d__Bacteria.p__Firmicutes.c__Clostridia.o__Oscillospirales.f__Oscillospiraceae.g__UCG_003	3.59608	M.Normal	3.22318	6.40E-14
d__Bacteria.p__Firmicutes.c__Clostridia.o__Oscillospirales.f__Butyricicoccaceae.g__Butyricicoccus	3.43115	F.Normal	2.95917	6.59E-10		d__Bacteria.p__Firmicutes.c__Clostridia.o__Lachnospirales.f__Lachnospiraceae.g__Lachnospiraceae_UCG_001	3.51144	M.Normal	3.21398	1.48E-12
d__Bacteria.p__Firmicutes.c__Bacilli.o__Erysipelotrichales.f__Erysipelotrichaceae.g__Holdemanella	3.49615	F.Normal	2.95291	0.0299401		d__Bacteria.p__Firmicutes.c__Clostridia.o__Oscillospirales.f__UCG_010.g__UCG_010	3.48801	M.Normal	3.17375	3.06E-07
d__Bacteria.p__Bacteroidota.c__Bacteroidia.o__Bacteroidales.f__Marinifilaceae.g__Butyricimonas	3.28102	F.Normal	2.94853	6.83E-08		d__Bacteria.p__Proteobacteria.c__Gammaproteobacteria.o__Pasteurellales.f__Pasteurellaceae.g__Haemophilus	3.66858	M.Normal	3.16248	1.95E-06
d__Bacteria.p__Firmicutes.c__Bacilli.o__Erysipelotrichales.f__Erysipelatoclostridiaceae.g__Erysipelotrichaceae_UCG_003	3.35045	F.Normal	2.93654	5.35E-08		d__Bacteria.p__Proteobacteria.c__Gammaproteobacteria.o__Burkholderiales.f__Sutterellaceae.g__Parasutterella	3.47349	M.Normal	3.09752	3.23E-07
d__Bacteria.p__Desulfobacterota.c__Desulfovibrionia.o__Desulfovibrionales.f__Desulfovibrionaceae.g__Bilophila	3.3719	F.Normal	2.92942	3.75E-07		d__Bacteria.p__Firmicutes.c__Clostridia.o__Oscillospirales.f__Ruminococcaceae.g__uncultured	3.49855	M.Normal	3.09666	7.86E-12
d__Bacteria.p__Proteobacteria.c__Alphaproteobacteria.o__Rhodospirillales.f__uncultured.g__uncultured	3.21954	F.Normal	2.9283	0.041599		d__Bacteria.p__Firmicutes.c__Clostridia.o__Lachnospirales.f__Lachnospiraceae.g__Agathobacter	3.86812	M.Normal	3.07024	5.56E-05
d__Bacteria.p__Firmicutes.c__Clostridia.o__Lachnospirales.f__Lachnospiraceae.g__Anaerostipes	3.66148	F.Normal	2.92176	0.000100788		d__Bacteria.p__Bacteroidota.c__Bacteroidia.o__Bacteroidales.f__Barnesiellaceae.g__Barnesiella	3.41756	M.Normal	3.06795	6.74E-08
d__Bacteria.p__Firmicutes.c__Clostridia.o__Oscillospirales.f__Ruminococcaceae.g__CAG_352	3.42469	F.Normal	2.90497	0.0180327		d__Bacteria.p__Firmicutes.c__Clostridia.o__Oscillospirales.f__Butyricicoccaceae.g__Butyricicoccus	3.45254	M.Normal	3.03551	3.71E-14
d__Bacteria.p__Firmicutes.c__Clostridia.o__Lachnospirales.f__Lachnospiraceae.g__Lachnospiraceae_UCG_004	3.31828	F.Normal	2.88542	5.27E-09		d__Bacteria.p__Bacteroidota.c__Bacteroidia.o__Bacteroidales.f__Marinifilaceae.g__Odoribacter	3.35938	M.Normal	3.01881	3.05E-14
d__Bacteria.p__Firmicutes.c__Clostridia.o__Oscillospirales.f__Oscillospiraceae.g__Flavonifractor	3.21057	F.Normal	2.88296	2.93E-10		d__Bacteria.p__Firmicutes.c__Bacilli.o__Erysipelotrichales.f__Erysipelotrichaceae.g__Holdemanella	3.55025	M.Normal	2.98543	0.012116
d__Bacteria.p__Firmicutes.c__Clostridia.o__Monoglobales.f__Monoglobaceae.g__Monoglobus	3.20421	F.Normal	2.87594	3.46E-15		d__Bacteria.p__Firmicutes.c__Clostridia.o__Oscillospirales.f__Oscillospiraceae.g__Oscillibacter	3.27259	M.Normal	2.93068	2.45E-18
d__Bacteria.p__Firmicutes.c__Negativicutes.o__Veillonellales_Selenomonadales.f__Veillonellaceae.g__Veillonella	3.59396	F.Normal	2.84491	0.00183828		d__Bacteria.p__Bacteroidota.c__Bacteroidia.o__Bacteroidales.f__Marinifilaceae.g__Butyricimonas	3.25769	M.Normal	2.93067	3.21E-09
d__Bacteria.p__Firmicutes.c__Clostridia.o__Lachnospirales.f__Lachnospiraceae.g___Eubacterium__ventriosum_group	3.18404	F.Normal	2.83158	1.66E-12		d__Bacteria.p__Desulfobacterota.c__Desulfovibrionia.o__Desulfovibrionales.f__Desulfovibrionaceae.g__Bilophila	3.34793	M.Normal	2.92869	2.96E-08
d__Bacteria.p__Firmicutes.c__Clostridia.o__Clostridia_vadinBB60_group.f__Clostridia_vadinBB60_group.g__Clostridia_vadinBB60_group	3.14847	F.Normal	2.76089	3.52E-06		d__Bacteria.p__Firmicutes.c__Clostridia.o__Oscillospirales.f__Ruminococcaceae.g__Subdoligranulum	3.98798	M.Normal	2.88744	0.00275838
d__Bacteria.p__Firmicutes.c__Bacilli.o__RF39.f__RF39.g__RF39	3.04711	F.Normal	2.75456	2.16E-07		d__Bacteria.p__Firmicutes.c__Clostridia.o__Lachnospirales.f__Lachnospiraceae.g__Lachnospiraceae_UCG_004	3.2968	M.Normal	2.86723	8.29E-10
d__Bacteria.p__Firmicutes.c__Clostridia.o__Lachnospirales.f__Lachnospiraceae.g__Lachnospiraceae_UCG_003	3.04069	F.Normal	2.74064	0.00296352		d__Bacteria.p__Firmicutes.c__Negativicutes.o__Veillonellales_Selenomonadales.f__Veillonellaceae.g__Veillonella	3.53174	M.Normal	2.83756	0.00260637
d__Bacteria.p__Firmicutes.c__Clostridia.o__Oscillospirales.f__Oscillospiraceae.g__Colidextribacter	3.1598	F.Normal	2.67645	1.22E-10		d__Bacteria.p__Firmicutes.c__Clostridia.o__Oscillospirales.f__Oscillospiraceae.g__Flavonifractor	3.18947	M.Normal	2.8362	1.30E-11
d__Bacteria.p__Firmicutes.c__Clostridia.o__Lachnospirales.f__Lachnospiraceae.g___Eubacterium__xylanophilum_group	3.00205	F.Normal	2.67293	1.57E-05		d__Bacteria.p__Firmicutes.c__Clostridia.o__Lachnospirales.f__Lachnospiraceae.g__Anaerostipes	3.58647	M.Normal	2.8209	3.05E-06
d__Bacteria.p__Firmicutes.c__Clostridia.o__Lachnospirales.f__Lachnospiraceae.g__Lachnospiraceae_UCG_010	3.20774	F.Normal	2.53825	3.16E-09		d__Bacteria.p__Firmicutes.c__Clostridia.o__Clostridia_vadinBB60_group.f__Clostridia_vadinBB60_group.g__Clostridia_vadinBB60_group	3.15119	M.Normal	2.81347	4.29E-06
d__Bacteria.p__Bacteroidota.c__Bacteroidia.o__Bacteroidales.f__Barnesiellaceae.g__Coprobacter	2.83019	F.Normal	2.52941	0.000359551		d__Bacteria.p__Firmicutes.c__Clostridia.o__Oscillospirales.f__Ruminococcaceae.g__CAG_352	3.37527	M.Normal	2.79744	0.011335
d__Bacteria.p__Proteobacteria.c__Gammaproteobacteria.o__Enterobacterales.f__Enterobacteriaceae.g__Citrobacter	2.93864	F.Normal	2.52405	0.0395705		d__Bacteria.p__Firmicutes.c__Bacilli.o__Erysipelotrichales.f__Erysipelatoclostridiaceae.g__Erysipelotrichaceae_UCG_003	3.27741	M.Normal	2.78687	2.87E-09
d__Bacteria.p__Firmicutes.c__Clostridia.o__Oscillospirales.f__Oscillospiraceae.g__uncultured	3.05803	F.Normal	2.50144	1.36E-08		d__Bacteria.p__Firmicutes.c__Bacilli.o__RF39.f__RF39.g__RF39	2.98019	M.Normal	2.6678	6.02E-08
d__Bacteria.p__Firmicutes.c__Clostridia.o__Lachnospirales.f__Lachnospiraceae.g__uncultured	3.01802	F.Normal	2.45292	3.29E-08		d__Bacteria.p__Firmicutes.c__Clostridia.o__Oscillospirales.f__Oscillospiraceae.g__Colidextribacter	3.09458	M.Normal	2.64235	5.72E-12
d__Bacteria.p__Firmicutes.c__Clostridia.o__Lachnospirales.f__Lachnospiraceae.g__CAG_56	2.90159	F.Normal	2.45206	2.17E-05		d__Bacteria.p__Bacteroidota.c__Bacteroidia.o__Bacteroidales.f__Barnesiellaceae.g__Coprobacter	2.97039	M.Normal	2.63589	0.000101883
d__Bacteria.p__Firmicutes.c__Clostridia.o__Oscillospirales.f__Ruminococcaceae.g__Incertae_Sedis	3.03716	F.Normal	2.42491	2.27E-05		d__Bacteria.p__Firmicutes.c__Clostridia.o__Monoglobales.f__Monoglobaceae.g__Monoglobus	3.07262	M.Normal	2.63385	1.34E-09
d__Bacteria.p__Firmicutes.c__Bacilli.o__Izemoplasmatales.f__Izemoplasmatales.g__Izemoplasmatales	2.65262	F.Normal	2.33158	0.0348391		d__Bacteria.p__Firmicutes.c__Clostridia.o__Oscillospirales.f__Ruminococcaceae.g___Eubacterium__siraeum_group	3.18412	M.Normal	2.61842	0.0144092
d__Bacteria.p__Firmicutes.c__Bacilli.o__Erysipelotrichales.f__Erysipelotrichaceae.g__Holdemania	2.58357	F.Normal	2.28702	7.03E-13		d__Bacteria.p__Firmicutes.c__Clostridia.o__Lachnospirales.f__Lachnospiraceae.g__Lachnospiraceae_UCG_003	2.86659	M.Normal	2.5575	0.000646525
d__Bacteria.p__Firmicutes.c__Negativicutes.o__Acidaminococcales.f__Acidaminococcaceae.g__Succiniclasticum	2.59322	F.Normal	2.26427	0.00748075		d__Bacteria.p__Firmicutes.c__Clostridia.o__Lachnospirales.f__Lachnospiraceae.g___Eubacterium__ventriosum_group	2.94083	M.Normal	2.49372	8.82E-13
d__Bacteria.p__Firmicutes.c__Clostridia.o__Peptostreptococcales_Tissierellales.f__Anaerovoracaceae.g__Family_XIII_AD3011_group	2.90354	F.Normal	2.25797	9.04E-05		d__Bacteria.p__Firmicutes.c__Clostridia.o__Lachnospirales.f__Lachnospiraceae.g__Lachnospiraceae_UCG_010	3.12317	M.Normal	2.4831	1.73E-07
d__Bacteria.p__Firmicutes.c__Bacilli.o__Lactobacillales.f__Leuconostocaceae.g__Weissella	2.54321	F.Normal	2.2086	9.81E-05		d__Bacteria.p__Firmicutes.c__Bacilli.o__Erysipelotrichales.f__Erysipelatoclostridiaceae.g__Asteroleplasma	2.73501	M.Normal	2.42322	0.0373902
d__Bacteria.p__Firmicutes.c__Clostridia.o__Oscillospirales.f__Ruminococcaceae.g__UBA1819	2.71831	F.Normal	2.18813	9.46E-06		d__Bacteria.p__Firmicutes.c__Clostridia.o__Lachnospirales.f__Lachnospiraceae.g___Eubacterium__xylanophilum_group	2.7091	M.Normal	2.38793	0.000216595
d__Bacteria.p__Firmicutes.c__Bacilli.o__Erysipelotrichales.f__Erysipelatoclostridiaceae.g__UCG_004	2.42346	F.Normal	2.12247	0.0025183		d__Bacteria.p__Firmicutes.c__Clostridia.o__Lachnospirales.f__Lachnospiraceae.g__uncultured	3.08406	M.Normal	2.37957	0.00103125
d__Bacteria.p__Verrucomicrobiota.c__Lentisphaeria.o__Victivallales.f__Victivallaceae.g__Victivallis	2.31028	F.Normal	2.00911	0.000430362		d__Bacteria.p__Verrucomicrobiota.c__Lentisphaeria.o__Victivallales.f__Victivallaceae.g__Victivallis	2.56118	M.Normal	2.28453	5.15E-06
d__Bacteria.p__Firmicutes.c__Bacilli.o__Lactobacillales.f__Streptococcaceae.g__Streptococcus.s__Streptococcus_agalactiae	4.22351	F.CRC	4.02778	3.70E-14		d__Bacteria.p__Firmicutes.c__Bacilli.o__Erysipelotrichales.f__Erysipelotrichaceae.g__Holdemania	2.5294	M.Normal	2.2237	2.32E-15
d__Bacteria.p__Actinobacteriota.c__Actinobacteria.o__Bifidobacteriales.f__Bifidobacteriaceae.g__Gardnerella.s__Gardnerella_vaginalis	4.4015	F.CRC	4.02194	2.07E-11		d__Bacteria.p__Firmicutes.c__Clostridia.o__Peptostreptococcales_Tissierellales.f__Anaerovoracaceae.g__Family_XIII_AD3011_group	2.8854	M.Normal	2.19272	0.000694773
d__Bacteria.p__Bacteroidota.c__Bacteroidia.o__Bacteroidales.f__Prevotellaceae.g__Prevotella.s__Prevotella_disiens	4.18832	F.CRC	3.85382	0.00579351		d__Bacteria.p__Firmicutes.c__Bacilli.o__Izemoplasmatales.f__Izemoplasmatales.g__Izemoplasmatales	2.42378	M.Normal	2.16765	0.00300996
d__Bacteria.p__Bacteroidota.c__Bacteroidia.o__Bacteroidales.f__Prevotellaceae.g__Prevotella.s__Prevotella_timonensis	4.15416	F.CRC	3.81447	1.64E-09		d__Bacteria.p__Firmicutes.c__Bacilli.o__Erysipelotrichales.f__Erysipelatoclostridiaceae.g__UCG_004	2.43061	M.Normal	2.15666	0.000101905
d__Bacteria.p__Firmicutes.c__Bacilli.o__Lactobacillales.f__Streptococcaceae.g__Streptococcus.s__Streptococcus_anginosus	4.17262	F.CRC	3.77264	2.82E-10		d__Bacteria.p__Firmicutes.c__Bacilli.o__Erysipelotrichales.f__Erysipelotrichaceae.g__Faecalitalea	2.50831	M.Normal	2.14417	0.0217846
d__Bacteria.p__Firmicutes.c__Clostridia.o__Peptostreptococcales_Tissierellales.f__Peptostreptococcales_Tissierellales.g__Peptoniphilus.s__uncultured_organism	3.96291	F.CRC	3.69394	5.61E-52		d__Bacteria.p__Firmicutes.c__Clostridia.o__Lachnospirales.f__Lachnospiraceae.g__CAG_56	2.78516	M.Normal	2.02373	0.000350457
d__Bacteria.p__Campilobacterota.c__Campylobacteria.o__Campylobacterales.f__Campylobacteraceae.g__Campylobacter.s__Campylobacter_hominis	3.92821	F.CRC	3.68028	1.38E-15		d__Bacteria.p__Bacteroidota.c__Bacteroidia.o__Bacteroidales.f__Prevotellaceae.g__Prevotella.s__Prevotella_corporis	4.27876	M.CRC	4.02687	2.72E-10
d__Bacteria.p__Firmicutes.c__Clostridia.o__Peptostreptococcales_Tissierellales.f__Peptostreptococcales_Tissierellales.g__Anaerococcus.s__Anaerococcus_vaginalis	3.94865	F.CRC	3.65645	2.37E-62		d__Bacteria.p__Actinobacteriota.c__Actinobacteria.o__Corynebacteriales.f__Corynebacteriaceae.g__Corynebacterium.s__Corynebacterium_tuberculostearicum	4.21728	M.CRC	3.89805	6.19E-31
d__Bacteria.p__Actinobacteriota.c__Actinobacteria.o__Bifidobacteriales.f__Bifidobacteriaceae.g__Bifidobacterium.s__Bifidobacterium_longum	3.94565	F.CRC	3.53509	0.0125072		d__Bacteria.p__Actinobacteriota.c__Actinobacteria.o__Corynebacteriales.f__Corynebacteriaceae.g__Corynebacterium.s__Corynebacterium_amycolatum	4.11531	M.CRC	3.84954	1.14E-12
d__Bacteria.p__Firmicutes.c__Clostridia.o__Peptostreptococcales_Tissierellales.f__Peptostreptococcales_Tissierellales.g__Peptoniphilus.s__Peptoniphilus_coxii	3.78823	F.CRC	3.49988	1.52E-48		d__Bacteria.p__Firmicutes.c__Bacilli.o__Lactobacillales.f__Streptococcaceae.g__Streptococcus.s__Streptococcus_anginosus	4.04632	M.CRC	3.81765	1.21E-07
d__Bacteria.p__Firmicutes.c__Clostridia.o__Peptostreptococcales_Tissierellales.f__Peptostreptococcaceae.g__Peptostreptococcus.s__Peptostreptococcus_anaerobius	3.75228	F.CRC	3.49848	3.29E-11		d__Bacteria.p__Firmicutes.c__Clostridia.o__Peptostreptococcales_Tissierellales.f__Peptostreptococcales_Tissierellales.g__Peptoniphilus.s__uncultured_organism	4.11542	M.CRC	3.80467	2.89E-32
d__Bacteria.p__Bacteroidota.c__Bacteroidia.o__Bacteroidales.f__Prevotellaceae.g__Prevotella.s__Prevotella_buccalis	3.73853	F.CRC	3.48265	3.26E-37		d__Bacteria.p__Bacteroidota.c__Bacteroidia.o__Bacteroidales.f__Porphyromonadaceae.g__Porphyromonas.s__Porphyromonas_gingivalis	4.13234	M.CRC	3.79999	0.00291032
d__Bacteria.p__Actinobacteriota.c__Actinobacteria.o__Corynebacteriales.f__Corynebacteriaceae.g__Corynebacterium.s__Corynebacterium_tuberculostearicum	3.8542	F.CRC	3.46147	7.91E-52		d__Bacteria.p__Bacteroidota.c__Bacteroidia.o__Bacteroidales.f__Prevotellaceae.g__Prevotella.s__Prevotella_buccalis	3.9342	M.CRC	3.65738	2.86E-21
d__Bacteria.p__Bacteroidota.c__Bacteroidia.o__Bacteroidales.f__Porphyromonadaceae.g__Porphyromonas.s__Porphyromonas_bennonis	3.76317	F.CRC	3.43891	8.38E-30		d__Bacteria.p__Actinobacteriota.c__Actinobacteria.o__Corynebacteriales.f__Corynebacteriaceae.g__Corynebacterium.s__Corynebacterium_simulans	3.95194	M.CRC	3.62687	1.58E-09
d__Bacteria.p__Firmicutes.c__Clostridia.o__Peptostreptococcales_Tissierellales.f__Peptostreptococcales_Tissierellales.g__Peptoniphilus.s__Peptoniphilus_duerdenii	3.67897	F.CRC	3.41752	3.37E-34		d__Bacteria.p__Firmicutes.c__Clostridia.o__Peptostreptococcales_Tissierellales.f__Peptostreptococcales_Tissierellales.g__Anaerococcus.s__Anaerococcus_vaginalis	3.86847	M.CRC	3.60318	5.46E-30
d__Bacteria.p__Firmicutes.c__Clostridia.o__Peptostreptococcales_Tissierellales.f__Anaerovoracaceae.g__S5_A14a.s__uncultured_Anaerovorax	3.66106	F.CRC	3.39513	2.09E-48		d__Bacteria.p__Bacteroidota.c__Bacteroidia.o__Bacteroidales.f__Prevotellaceae.g__Prevotella.s__Prevotella_disiens	3.85318	M.CRC	3.56418	2.93E-07
d__Bacteria.p__Firmicutes.c__Negativicutes.o__Veillonellales_Selenomonadales.f__Veillonellaceae.g__Dialister.s__Dialister_propionicifaciens	3.67411	F.CRC	3.37715	4.28E-44		d__Bacteria.p__Campilobacterota.c__Campylobacteria.o__Campylobacterales.f__Campylobacteraceae.g__Campylobacter.s__Campylobacter_hominis	3.76446	M.CRC	3.52402	2.80E-15
d__Bacteria.p__Firmicutes.c__Clostridia.o__Peptostreptococcales_Tissierellales.f__Peptostreptococcales_Tissierellales.g__Murdochiella.s__Murdochiella_asaccharolytica	3.69459	F.CRC	3.37706	6.40E-18		d__Bacteria.p__Actinobacteriota.c__Actinobacteria.o__Bifidobacteriales.f__Bifidobacteriaceae.g__Bifidobacterium.s__Bifidobacterium_adolescentis	3.89679	M.CRC	3.51355	0.00372248
d__Bacteria.p__Bacteroidota.c__Bacteroidia.o__Bacteroidales.f__Prevotellaceae.g__Prevotella.s__Prevotella_corporis	3.61623	F.CRC	3.3743	0.00154967		d__Bacteria.p__Firmicutes.c__Clostridia.o__Peptostreptococcales_Tissierellales.f__Peptostreptococcales_Tissierellales.g__Murdochiella.s__Murdochiella_asaccharolytica	3.77446	M.CRC	3.49741	2.95E-19
d__Bacteria.p__Bacteroidota.c__Bacteroidia.o__Sphingobacteriales.f__Sphingobacteriaceae.g__Sphingobacterium.s__Sphingobacterium_faecium	3.70848	F.CRC	3.36815	1.34E-41		d__Bacteria.p__Firmicutes.c__Clostridia.o__Peptostreptococcales_Tissierellales.f__Peptostreptococcales_Tissierellales.g__Peptoniphilus.s__Peptoniphilus_duerdenii	3.7012	M.CRC	3.4474	4.34E-15
d__Bacteria.p__Bacteroidota.c__Bacteroidia.o__Bacteroidales.f__Prevotellaceae.g__Prevotella.s__Prevotella_bivia	3.62562	F.CRC	3.3442	0.0369177		d__Bacteria.p__Bacteroidota.c__Bacteroidia.o__Sphingobacteriales.f__Sphingobacteriaceae.g__Sphingobacterium.s__Sphingobacterium_faecium	3.75787	M.CRC	3.41261	7.10E-12
d__Bacteria.p__Actinobacteriota.c__Actinobacteria.o__Actinomycetales.f__Actinomycetaceae.g__Actinomyces.s__Chlamydia_trachomatis	3.56761	F.CRC	3.33202	7.91E-10		d__Bacteria.p__Firmicutes.c__Clostridia.o__Lachnospirales.f__Lachnospiraceae.g__Dorea.s__uncultured_bacterium	3.71107	M.CRC	3.30077	0.0104119
d__Bacteria.p__Campilobacterota.c__Campylobacteria.o__Campylobacterales.f__Campylobacteraceae.g__Campylobacter.s__Campylobacter_ureolyticus	3.66424	F.CRC	3.316	9.03E-28		d__Bacteria.p__Firmicutes.c__Clostridia.o__Peptostreptococcales_Tissierellales.f__Anaerovoracaceae.g__S5_A14a.s__uncultured_Anaerovorax	3.56381	M.CRC	3.29939	4.17E-20
d__Bacteria.p__Firmicutes.c__Clostridia.o__Peptostreptococcales_Tissierellales.f__Peptostreptococcales_Tissierellales.g__Peptoniphilus.s__Peptoniphilus_lacrimalis	3.56421	F.CRC	3.27797	5.57E-48		d__Bacteria.p__Actinobacteriota.c__Actinobacteria.o__Bifidobacteriales.f__Bifidobacteriaceae.g__Alloscardovia.s__Alloscardovia_omnicolens	3.6343	M.CRC	3.26781	5.95E-05
d__Bacteria.p__Firmicutes.c__Clostridia.o__Peptostreptococcales_Tissierellales.f__Peptostreptococcales_Tissierellales.g__Anaerococcus.s__Anaerococcus_mediterraneensis	3.52928	F.CRC	3.26628	2.50E-38		d__Bacteria.p__Firmicutes.c__Clostridia.o__Peptostreptococcales_Tissierellales.f__Peptostreptococcales_Tissierellales.g__Peptoniphilus.s__Peptoniphilus_urinimassiliensis	3.53072	M.CRC	3.25301	2.82E-14
d__Bacteria.p__Actinobacteriota.c__Actinobacteria.o__Bifidobacteriales.f__Bifidobacteriaceae.g__Bifidobacterium.s__Bifidobacterium_adolescentis	3.85728	F.CRC	3.21874	0.00829527		d__Bacteria.p__Firmicutes.c__Clostridia.o__Peptostreptococcales_Tissierellales.f__Peptostreptococcales_Tissierellales.g__Anaerococcus.s__Anaerococcus_prevotii	3.59334	M.CRC	3.23544	4.34E-15
d__Bacteria.p__Firmicutes.c__Clostridia.o__Lachnospirales.f__Lachnospiraceae.g__Fusicatenibacter.s__uncultured_organism	3.78048	F.CRC	3.18282	0.00126781		d__Bacteria.p__Bacteroidota.c__Bacteroidia.o__Bacteroidales.f__Prevotellaceae.g__Prevotella.s__Prevotella_timonensis	3.53601	M.CRC	3.21978	0.00120497
d__Bacteria.p__Bacteroidota.c__Bacteroidia.o__Bacteroidales.f__Prevotellaceae.g__Prevotella.s__Massiliprevotella_massiliensis	3.4471	F.CRC	3.16785	0.000691228		d__Bacteria.p__Firmicutes.c__Clostridia.o__Peptostreptococcales_Tissierellales.f__Peptostreptococcales_Tissierellales.g__Fenollaria.s__uncultured_bacterium	3.44566	M.CRC	3.18298	3.18E-07
d__Bacteria.p__Firmicutes.c__Clostridia.o__Peptostreptococcales_Tissierellales.f__Peptostreptococcales_Tissierellales.g__Anaerococcus.s__Anaerococcus_lactolyticus	3.38679	F.CRC	3.12202	6.12E-07		d__Bacteria.p__Firmicutes.c__Bacilli.o__Lactobacillales.f__Streptococcaceae.g__Streptococcus.s__Streptococcus_constellatus	3.52552	M.CRC	3.16203	1.72E-05
d__Bacteria.p__Actinobacteriota.c__Coriobacteriia.o__Coriobacteriales.f__Atopobiaceae.g__Atopobium.s__Atopobium_vaginae	3.44326	F.CRC	3.07392	9.58E-15		d__Bacteria.p__Firmicutes.c__Clostridia.o__Peptostreptococcales_Tissierellales.f__Peptostreptococcales_Tissierellales.g__Peptoniphilus.s__Peptoniphilus_lacrimalis	3.41469	M.CRC	3.14259	6.26E-21
d__Bacteria.p__Bacteroidota.c__Bacteroidia.o__Bacteroidales.f__Porphyromonadaceae.g__Porphyromonas.s__Porphyromonas_asaccharolytica	3.38124	F.CRC	3.0664	1.03E-21		d__Bacteria.p__Proteobacteria.c__Gammaproteobacteria.o__Xanthomonadales.f__Xanthomonadaceae.g__Stenotrophomonas.s__Stenotrophomonas_rhizophila	3.48055	M.CRC	3.11162	1.58E-09
d__Bacteria.p__Proteobacteria.c__Gammaproteobacteria.o__Xanthomonadales.f__Xanthomonadaceae.g__Stenotrophomonas.s__Stenotrophomonas_rhizophila	3.42207	F.CRC	3.05857	1.83E-31		d__Bacteria.p__Firmicutes.c__Clostridia.o__Peptostreptococcales_Tissierellales.f__Peptostreptococcales_Tissierellales.g__Finegoldia.s__Finegoldia_magna	3.34242	M.CRC	3.08069	0.0155187
d__Bacteria.p__Actinobacteriota.c__Actinobacteria.o__Actinomycetales.f__Actinomycetaceae.g__Actinomyces.s__Schaalia_turicensis	3.34077	F.CRC	3.02006	4.97E-15		d__Bacteria.p__Firmicutes.c__Clostridia.o__Clostridia.f__Hungateiclostridiaceae.g__Fastidiosipila.s__Clostridiales_bacterium	3.33201	M.CRC	3.07132	1.07E-11
d__Bacteria.p__Bacteroidota.c__Bacteroidia.o__Bacteroidales.f__Porphyromonadaceae.g__Porphyromonas.s__Porphyromonas_uenonis	3.21547	F.CRC	3.0086	6.69E-23		d__Bacteria.p__Actinobacteriota.c__Actinobacteria.o__Corynebacteriales.f__Corynebacteriaceae.g__Lawsonella.s__uncultured_bacterium	3.38491	M.CRC	3.04406	5.95E-05
d__Bacteria.p__Firmicutes.c__Clostridia.o__Peptostreptococcales_Tissierellales.f__Peptostreptococcales_Tissierellales.g__Anaerococcus.s__Anaerococcus_prevotii	3.27273	F.CRC	3.00011	3.28E-38		d__Bacteria.p__Firmicutes.c__Clostridia.o__Peptostreptococcales_Tissierellales.f__Peptostreptococcales_Tissierellales.g__Peptoniphilus.s__Peptoniphilus_coxii	3.31636	M.CRC	3.03153	7.10E-12
d__Bacteria.p__Firmicutes.c__Clostridia.o__Peptostreptococcales_Tissierellales.f__Peptostreptococcales_Tissierellales.g__Gallicola.s__uncultured_bacterium	3.3009	F.CRC	2.9891	7.83E-35		d__Bacteria.p__Actinobacteriota.c__Actinobacteria.o__Actinomycetales.f__Actinomycetaceae.g__Mobiluncus.s__Mobiluncus_curtisii	3.26919	M.CRC	3.01696	2.64E-10
d__Bacteria.p__Firmicutes.c__Clostridia.o__Peptostreptococcales_Tissierellales.f__Peptostreptococcales_Tissierellales.g__Murdochiella.s__Murdochiella_vaginalis	3.17841	F.CRC	2.94734	4.59E-08		d__Bacteria.p__Firmicutes.c__Negativicutes.o__Veillonellales_Selenomonadales.f__Veillonellaceae.g__Dialister.s__Dialister_propionicifaciens	3.2985	M.CRC	3.01571	2.98E-19
d__Bacteria.p__Firmicutes.c__Clostridia.o__Peptostreptococcales_Tissierellales.f__Peptostreptococcales_Tissierellales.g__Peptoniphilus.s__Peptoniphilus_urinimassiliensis	3.23386	F.CRC	2.93865	7.83E-35		d__Bacteria.p__Firmicutes.c__Clostridia.o__Peptostreptococcales_Tissierellales.f__Peptostreptococcaceae.g__Peptostreptococcus.s__Peptostreptococcus_anaerobius	3.21091	M.CRC	2.9431	1.83E-05
d__Bacteria.p__Actinobacteriota.c__Actinobacteria.o__Bifidobacteriales.f__Bifidobacteriaceae.g__Bifidobacterium.s__Bifidobacterium_pseudolongum	3.33038	F.CRC	2.89664	4.59E-08		d__Bacteria.p__Firmicutes.c__Clostridia.o__Peptostreptococcales_Tissierellales.f__Peptostreptococcales_Tissierellales.g__Anaerococcus.s__Anaerococcus_mediterraneensis	3.15943	M.CRC	2.94004	4.36E-11
d__Bacteria.p__Firmicutes.c__Bacilli.o__Lactobacillales.f__Streptococcaceae.g__Streptococcus.s__Streptococcus_constellatus	3.12626	F.CRC	2.87115	0.000286147		d__Bacteria.p__Actinobacteriota.c__Actinobacteria.o__Corynebacteriales.f__Corynebacteriaceae.g__Corynebacterium.s__Corynebacterium_glucuronolyticum	3.09117	M.CRC	2.84812	0.00196166
d__Bacteria.p__Firmicutes.c__Clostridia.o__Oscillospirales.f__Ruminococcaceae.g__Ruminococcus.s__metagenome	3.20821	F.CRC	2.85594	0.0104602		d__Bacteria.p__Firmicutes.c__Clostridia.o__Lachnospirales.f__Lachnospiraceae.g__Roseburia.s__uncultured_Roseburia	3.10833	M.CRC	2.83981	0.00417611
d__Bacteria.p__Actinobacteriota.c__Actinobacteria.o__Corynebacteriales.f__Corynebacteriaceae.g__Corynebacterium.s__Corynebacterium_glucuronolyticum	3.14145	F.CRC	2.78003	9.58E-15		d__Bacteria.p__Bacteroidota.c__Bacteroidia.o__Bacteroidales.f__Prevotellaceae.g__Alloprevotella.s__Prevotellaceae_bacterium	3.58786	M.CRC	2.83737	0.0449627
d__Bacteria.p__Actinobacteriota.c__Actinobacteria.o__Actinomycetales.f__Actinomycetaceae.g__Mobiluncus.s__Mobiluncus_curtisii	3.02292	F.CRC	2.7472	2.07E-11		d__Bacteria.p__Bacteroidota.c__Bacteroidia.o__Bacteroidales.f__Porphyromonadaceae.g__Porphyromonas.s__Porphyromonas_bennonis	3.09925	M.CRC	2.83199	2.98E-19
d__Bacteria.p__Bacteroidota.c__Bacteroidia.o__Bacteroidales.f__Bacteroidaceae.g__Bacteroides.s__Bacteroides_fluxus	2.99489	F.CRC	2.73888	0.000112508		d__Bacteria.p__Bacteroidota.c__Bacteroidia.o__Bacteroidales.f__Prevotellaceae.g__Prevotella.s__Massiliprevotella_massiliensis	3.19156	M.CRC	2.78357	0.000359492
d__Bacteria.p__Fusobacteriota.c__Fusobacteriia.o__Fusobacteriales.f__Fusobacteriaceae.g__Fusobacterium.s__Fusobacterium_nucleatum	2.8723	F.CRC	2.66579	7.35E-05		d__Bacteria.p__Firmicutes.c__Negativicutes.o__Veillonellales_Selenomonadales.f__Veillonellaceae.g__Anaeroglobus.s__Anaeroglobus_geminatus	3.21245	M.CRC	2.78352	0.0155187
d__Bacteria.p__Actinobacteriota.c__Actinobacteria.o__Bifidobacteriales.f__Bifidobacteriaceae.g__Alloscardovia.s__Alloscardovia_omnicolens	3.03237	F.CRC	2.66316	7.04E-10		d__Bacteria.p__Firmicutes.c__Bacilli.o__Lactobacillales.f__Streptococcaceae.g__Streptococcus.s__Streptococcus_salivarius	3.61618	M.CRC	2.72461	0.0224687
d__Bacteria.p__Actinobacteriota.c__Actinobacteria.o__Corynebacteriales.f__Corynebacteriaceae.g__Corynebacterium.s__Corynebacterium_amycolatum	2.81895	F.CRC	2.64833	2.05E-21		d__Bacteria.p__Fusobacteriota.c__Fusobacteriia.o__Fusobacteriales.f__Fusobacteriaceae.g__Fusobacterium.s__Fusobacterium_gonidiaformans	3.03715	M.CRC	2.71919	0.00254696
d__Bacteria.p__Actinobacteriota.c__Actinobacteria.o__Corynebacteriales.f__Corynebacteriaceae.g__Corynebacteriaceae.s__Corynebacterium_sp_	2.83754	F.CRC	2.635	0.000112508		d__Bacteria.p__Actinobacteriota.c__Actinobacteria.o__Bifidobacteriales.f__Bifidobacteriaceae.g__Bifidobacterium.s__Bifidobacterium_longum	3.42035	M.CRC	2.71131	0.000616724
d__Bacteria.p__Firmicutes.c__Clostridia.o__Lachnospirales.f__Lachnospiraceae.g__Cellulosilyticum.s__uncultured_bacterium	2.93441	F.CRC	2.63292	0.0222203		d__Bacteria.p__Firmicutes.c__Clostridia.o__Peptococcales.f__Peptococcaceae.g__Peptococcus.s__Peptococcus_niger	2.99047	M.CRC	2.69102	1.14E-12
d__Bacteria.p__Firmicutes.c__Clostridia.o__Peptostreptococcales_Tissierellales.f__Peptostreptococcales_Tissierellales.g__Peptoniphilus.s__Peptoniphilus_koenoeneniae	2.86909	F.CRC	2.60942	2.05E-21		d__Bacteria.p__Proteobacteria.c__Gammaproteobacteria.o__Pseudomonadales.f__Pseudomonadaceae.g__Pseudomonas.s__Pseudomonas_veronii	2.97319	M.CRC	2.66967	1.04E-05
d__Bacteria.p__Firmicutes.c__Clostridia.o__Oscillospirales.f__Ruminococcaceae.g__Ruminococcus.s__Ruminococcus_callidus	3.26018	F.CRC	2.60379	0.0211865		d__Bacteria.p__Firmicutes.c__Clostridia.o__Peptostreptococcales_Tissierellales.f__Peptostreptococcales_Tissierellales.g__Peptoniphilus.s__Clostridiales_bacterium	2.91568	M.CRC	2.65192	1.58E-09
d__Bacteria.p__Bacteroidota.c__Bacteroidia.o__Bacteroidales.f__Porphyromonadaceae.g__Porphyromonas.s__Porphyromonas_somerae	2.87475	F.CRC	2.58513	4.17E-28		d__Bacteria.p__Actinobacteriota.c__Actinobacteria.o__Actinomycetales.f__Actinomycetaceae.g__Actinomyces.s__Schaalia_turicensis	2.85908	M.CRC	2.64673	9.36E-09
d__Bacteria.p__Firmicutes.c__Clostridia.o__Peptostreptococcales_Tissierellales.f__Peptostreptococcales_Tissierellales.g__Ezakiella.s__Ezakiella_massiliensis	2.83332	F.CRC	2.56226	4.45E-18		d__Bacteria.p__Bacteroidota.c__Bacteroidia.o__Bacteroidales.f__Porphyromonadaceae.g__Porphyromonas.s__Porphyromonas_asaccharolytica	2.92585	M.CRC	2.6323	4.26E-14
d__Bacteria.p__Firmicutes.c__Negativicutes.o__Veillonellales_Selenomonadales.f__Veillonellaceae.g__Megasphaera.s__Megasphaera_micronuciformis	2.85684	F.CRC	2.52428	0.000263635		d__Bacteria.p__Firmicutes.c__Clostridia.o__Peptostreptococcales_Tissierellales.f__Peptostreptococcales_Tissierellales.g__Anaerococcus.s__Anaerococcus_provencensis	2.91711	M.CRC	2.62714	2.64E-10
d__Bacteria.p__Firmicutes.c__Clostridia.o__Clostridiales.f__Clostridiaceae.g__Clostridium_sensu_stricto_1.s__uncultured_Clostridium	2.98912	F.CRC	2.52387	0.0106125		d__Bacteria.p__Firmicutes.c__Clostridia.o__Peptostreptococcales_Tissierellales.f__Peptostreptococcales_Tissierellales.g__Peptoniphilus.s__unidentified_marine	2.8829	M.CRC	2.60199	1.04E-05
d__Bacteria.p__Firmicutes.c__Clostridia.o__Peptostreptococcales_Tissierellales.f__Peptostreptococcales_Tissierellales.g__Peptoniphilus.s__Peptoniphilaceae_bacterium	2.82315	F.CRC	2.51477	4.17E-28		d__Bacteria.p__Bacteroidota.c__Bacteroidia.o__Bacteroidales.f__Prevotellaceae.g__Prevotella.s__uncultured_Bacteroidetes	2.80966	M.CRC	2.5184	5.48E-08
d__Bacteria.p__Firmicutes.c__Clostridia.o__Peptococcales.f__Peptococcaceae.g__Peptococcus.s__Peptococcus_niger	2.78697	F.CRC	2.51041	1.83E-31		d__Bacteria.p__Actinobacteriota.c__Actinobacteria.o__Actinomycetales.f__Actinomycetaceae.g__Actinomyces.s__Winkia_neuii	2.78974	M.CRC	2.47894	5.48E-08
d__Bacteria.p__Actinobacteriota.c__Actinobacteria.o__Actinomycetales.f__Actinomycetaceae.g__Actinomyces.s__Winkia_neuii	2.78432	F.CRC	2.50895	9.33E-25		d__Bacteria.p__Firmicutes.c__Negativicutes.o__Veillonellales_Selenomonadales.f__Selenomonadaceae.g__uncultured.s__uncultured_rumen	2.70902	M.CRC	2.47325	0.0116616
d__Bacteria.p__Firmicutes.c__Bacilli.o__Erysipelotrichales.f__Erysipelotrichaceae.g__Solobacterium.s__Solobacterium_moorei	2.67531	F.CRC	2.49826	1.76E-35		d__Bacteria.p__Firmicutes.c__Bacilli.o__Staphylococcales.f__Gemellaceae.g__Gemella.s__uncultured_organism	2.73499	M.CRC	2.4632	1.74E-08
d__Bacteria.p__Firmicutes.c__Clostridia.o__Peptostreptococcales_Tissierellales.f__Peptostreptococcales_Tissierellales.g__W5053.s__unidentified_marine	2.78807	F.CRC	2.48315	2.05E-21		d__Bacteria.p__Firmicutes.c__Clostridia.o__Peptostreptococcales_Tissierellales.f__Peptostreptococcales_Tissierellales.g__Peptoniphilus.s__Peptoniphilus_obesi	2.79981	M.CRC	2.44852	7.10E-12
d__Bacteria.p__Firmicutes.c__Clostridia.o__Peptostreptococcales_Tissierellales.f__Peptostreptococcales_Tissierellales.g__Peptoniphilus.s__Peptoniphilus_obesi	2.76127	F.CRC	2.46705	4.17E-28		d__Bacteria.p__Firmicutes.c__Clostridia.o__Clostridia_UCG_014.f__Clostridia_UCG_014.g__Clostridia_UCG_014.s__Clostridiales_bacterium	2.67903	M.CRC	2.44677	5.95E-05
d__Bacteria.p__Firmicutes.c__Negativicutes.o__Veillonellales_Selenomonadales.f__Veillonellaceae.g__Dialister.s__Dialister_pneumosintes	2.70338	F.CRC	2.46033	1.35E-25		d__Bacteria.p__Actinobacteriota.c__Coriobacteriia.o__Coriobacteriales.f__Atopobiaceae.g__Atopobium.s__Olsenella_sp_	2.7264	M.CRC	2.44558	0.000339774
d__Bacteria.p__Actinobacteriota.c__Actinobacteria.o__Corynebacteriales.f__Corynebacteriaceae.g__Corynebacterium.s__Corynebacterium_pyruviciproducens	2.89545	F.CRC	2.45206	9.33E-25		d__Bacteria.p__Bacteroidota.c__Bacteroidia.o__Bacteroidales.f__Prevotellaceae.g__Prevotella.s__Prevotella_sp_	2.68664	M.CRC	2.42662	0.0116616
d__Bacteria.p__Firmicutes.c__Clostridia.o__Peptostreptococcales_Tissierellales.f__Peptostreptococcales_Tissierellales.g__Fenollaria.s__uncultured_bacterium	2.67552	F.CRC	2.43543	6.93E-09		d__Bacteria.p__Campilobacterota.c__Campylobacteria.o__Campylobacterales.f__Campylobacteraceae.g__Campylobacter.s__Campylobacter_ureolyticus	2.75802	M.CRC	2.41717	1.67E-12
d__Bacteria.p__Actinobacteriota.c__Actinobacteria.o__Corynebacteriales.f__Corynebacteriaceae.g__Corynebacterium.s__Corynebacterium_simulans	2.79552	F.CRC	2.43507	9.58E-15		d__Bacteria.p__Bacteroidota.c__Bacteroidia.o__Bacteroidales.f__Prevotellaceae.g__Alloprevotella.s__Alloprevotella_tannerae	2.63212	M.CRC	2.4059	0.00196166
d__Bacteria.p__Firmicutes.c__Bacilli.o__Lactobacillales.f__Aerococcaceae.g__Facklamia.s__Facklamia_hominis	2.68811	F.CRC	2.37686	9.33E-25		d__Bacteria.p__Firmicutes.c__Bacilli.o__Lactobacillales.f__Lactobacillaceae.g__Lactobacillus.s__Lactobacillus_murinus	2.76224	M.CRC	2.38909	0.000339774
d__Bacteria.p__Firmicutes.c__Clostridia.o__Peptococcales.f__Peptococcaceae.g__Peptococcus.s__Peptococcus_simiae	2.61706	F.CRC	2.35879	9.58E-15		d__Bacteria.p__Actinobacteriota.c__Actinobacteria.o__Corynebacteriales.f__Corynebacteriaceae.g__Corynebacterium.s__Corynebacterium_imitans	2.6758	M.CRC	2.38629	5.95E-05
d__Bacteria.p__Firmicutes.c__Clostridia.o__Clostridia.f__Hungateiclostridiaceae.g__Fastidiosipila.s__Clostridiales_bacterium	2.64758	F.CRC	2.34324	1.27E-08		d__Bacteria.p__Bacteroidota.c__Bacteroidia.o__Bacteroidales.f__Porphyromonadaceae.g__Porphyromonas.s__Porphyromonas_uenonis	2.62471	M.CRC	2.35603	5.26E-07
d__Bacteria.p__Firmicutes.c__Negativicutes.o__Veillonellales_Selenomonadales.f__Veillonellaceae.g__Negativicoccus.s__uncultured_bacterium	2.53545	F.CRC	2.30819	9.58E-15		d__Bacteria.p__Firmicutes.c__Clostridia.o__Peptostreptococcales_Tissierellales.f__Peptostreptococcales_Tissierellales.g__Peptoniphilus.s__Peptoniphilaceae_bacterium	2.63418	M.CRC	2.35308	4.36E-11
d__Bacteria.p__Firmicutes.c__Bacilli.o__Staphylococcales.f__Gemellaceae.g__Gemella.s__uncultured_organism	2.517	F.CRC	2.29873	4.51E-08		d__Bacteria.p__Firmicutes.c__Clostridia.o__Oscillospirales.f__Ruminococcaceae.g__Ruminococcus.s__metagenome	2.96166	M.CRC	2.35136	0.000819286
d__Bacteria.p__Firmicutes.c__Negativicutes.o__Veillonellales_Selenomonadales.f__Veillonellaceae.g__Dialister.s__Dialister_micraerophilus	2.57015	F.CRC	2.25833	8.47E-12		d__Bacteria.p__Firmicutes.c__Clostridia.o__Peptostreptococcales_Tissierellales.f__Peptostreptococcaceae.g__Filifactor.s__Filifactor_alocis	2.76203	M.CRC	2.35103	0.00196166
d__Bacteria.p__Bacteroidota.c__Bacteroidia.o__Bacteroidales.f__Bacteroidaceae.g__Bacteroides.s__Bacteroides_barnesiae	2.39035	F.CRC	2.25744	0.000112508		d__Bacteria.p__Firmicutes.c__Negativicutes.o__Veillonellales_Selenomonadales.f__Veillonellaceae.g__Veillonella.s__Veillonella_atypica	2.82377	M.CRC	2.31974	0.0142816
d__Bacteria.p__Fusobacteriota.c__Fusobacteriia.o__Fusobacteriales.f__Fusobacteriaceae.g__Fusobacterium.s__Fusobacterium_varium	2.62098	F.CRC	2.24818	0.0261029		d__Bacteria.p__Firmicutes.c__Clostridia.o__Peptostreptococcales_Tissierellales.f__Peptostreptococcales_Tissierellales.g__W5053.s__unidentified_marine	2.57863	M.CRC	2.26797	5.48E-08
d__Bacteria.p__Firmicutes.c__Clostridia.o__Peptostreptococcales_Tissierellales.f__Peptostreptococcales_Tissierellales.g__Peptoniphilus.s__Clostridiales_bacterium	2.54801	F.CRC	2.24413	4.45E-18		d__Bacteria.p__Actinobacteriota.c__Actinobacteria.o__Corynebacteriales.f__Corynebacteriaceae.g__Corynebacterium.s__Corynebacterium_aurimucosum	2.52545	M.CRC	2.26727	0.000339774
d__Bacteria.p__Firmicutes.c__Bacilli.o__Lactobacillales.f__Lactobacillaceae.g__Lactobacillus.s__Lactobacillus_amylovorus	2.52438	F.CRC	2.22545	1.58E-05		d__Bacteria.p__Actinobacteriota.c__Actinobacteria.o__Corynebacteriales.f__Corynebacteriaceae.g__Corynebacterium.s__Corynebacterium_pyruviciproducens	2.53154	M.CRC	2.26628	1.58E-09
d__Bacteria.p__Firmicutes.c__Clostridia.o__Lachnospirales.f__Lachnospiraceae.g___Eubacterium__hallii_group.s__uncultured_bacterium	2.49671	F.CRC	2.22183	6.12E-07		d__Bacteria.p__Fusobacteriota.c__Fusobacteriia.o__Fusobacteriales.f__Fusobacteriaceae.g__Fusobacterium.s__Fusobacterium_nucleatum	2.44029	M.CRC	2.23784	0.021106
d__Bacteria.p__Actinobacteriota.c__Coriobacteriia.o__Coriobacteriales.f__Atopobiaceae.g__Atopobium.s__Atopobium_minutum	2.50987	F.CRC	2.21566	4.59E-08		d__Bacteria.p__Firmicutes.c__Clostridia.o__Peptostreptococcales_Tissierellales.f__Peptostreptococcales_Tissierellales.g__Gallicola.s__uncultured_bacterium	2.57498	M.CRC	2.23104	2.64E-10
d__Bacteria.p__Firmicutes.c__Clostridia.o__Clostridiales.f__Clostridiaceae.g__Clostridium_sensu_stricto_6.s__Clostridium_bornimense	2.62739	F.CRC	2.19687	0.000112508		d__Bacteria.p__Bacteroidota.c__Bacteroidia.o__Bacteroidales.f__Muribaculaceae.g__Muribaculaceae.s__uncultured_Porphyromonadaceae	2.68305	M.CRC	2.2307	0.00782753
d__Bacteria.p__Firmicutes.c__Negativicutes.o__Veillonellales_Selenomonadales.f__Veillonellaceae.g__Negativicoccus.s__Negativicoccus_massiliensis	2.48174	F.CRC	2.16626	1.37E-21		d__Bacteria.p__Bacteroidota.c__Bacteroidia.o__Bacteroidales.f__Prevotellaceae.g__Prevotellaceae_NK3B31_group.s__uncultured_bacterium	2.60282	M.CRC	2.19358	0.00274688
d__Bacteria.p__Firmicutes.c__Clostridia.o__Lachnospirales.f__Lachnospiraceae.g__Moryella.s__Moryella_indoligenes	2.41022	F.CRC	2.12983	2.07E-11		d__Bacteria.p__Firmicutes.c__Negativicutes.o__Veillonellales_Selenomonadales.f__Veillonellaceae.g__Negativicoccus.s__Negativicoccus_succinicivorans	2.38181	M.CRC	2.17683	5.95E-05
d__Bacteria.p__Actinobacteriota.c__Coriobacteriia.o__Coriobacteriales.f__Eggerthellaceae.g__Slackia.s__Slackia_exigua	2.43408	F.CRC	2.11166	1.27E-08		d__Bacteria.p__Firmicutes.c__Clostridia.o__Lachnospirales.f__Lachnospiraceae.g__Agathobacter.s__Eubacterium_ramulus	2.86577	M.CRC	2.14781	0.0313743
d__Bacteria.p__Actinobacteriota.c__Actinobacteria.o__Actinomycetales.f__Actinomycetaceae.g__Actinomyces.s__Schaalia_cardiffensis	2.25937	F.CRC	2.08239	0.000112508		d__Bacteria.p__Firmicutes.c__Bacilli.o__Lactobacillales.f__Streptococcaceae.g__Streptococcus.s__Streptococcus_dysgalactiae	2.42005	M.CRC	2.12969	0.0116616
d__Bacteria.p__Bacteroidota.c__Bacteroidia.o__Bacteroidales.f__Prevotellaceae.g__Prevotella.s__Prevotella_sp_	2.40252	F.CRC	2.07544	0.000303034		d__Bacteria.p__Firmicutes.c__Clostridia.o__Lachnospirales.f__Lachnospiraceae.g___Ruminococcus__torques_group.s__Ruminococcus_lactaris	2.75077	M.CRC	2.12966	0.000590885
d__Bacteria.p__Firmicutes.c__Clostridia.o__Lachnospirales.f__Lachnospiraceae.g___Ruminococcus__gauvreauii_group.s__uncultured_organism	2.33245	F.CRC	2.06364	0.000112508		d__Bacteria.p__Firmicutes.c__Clostridia.o__Peptostreptococcales_Tissierellales.f__Anaerovoracaceae.g___Eubacterium__nodatum_group.s___Eubacterium__nodatum	2.50961	M.CRC	2.10235	0.0116616
d__Bacteria.p__Firmicutes.c__Bacilli.o__Lactobacillales.f__Enterococcaceae.g__Enterococcus.s__Enterococcus_avium	2.41522	F.CRC	2.06264	0.0106125		d__Bacteria.p__Firmicutes.c__Clostridia.o__Oscillospirales.f__Ruminococcaceae.g__Incertae_Sedis.s___Clostridium__leptum	2.40772	M.CRC	2.09885	0.0483681
d__Bacteria.p__Firmicutes.c__Clostridia.o__Peptostreptococcales_Tissierellales.f__Peptostreptococcales_Tissierellales.g__Murdochiella.s__Murdochiella_sp_	2.36491	F.CRC	2.05097	0.000112508		d__Bacteria.p__Firmicutes.c__Negativicutes.o__Veillonellales_Selenomonadales.f__Veillonellaceae.g__Dialister.s__Dialister_pneumosintes	2.346	M.CRC	2.08875	1.15E-07
d__Bacteria.p__Firmicutes.c__Clostridia.o__Peptostreptococcales_Tissierellales.f__Peptostreptococcaceae.g__Clostridioides.s__Clostridioides_difficile	2.36987	F.CRC	2.05045	4.59E-08		d__Bacteria.p__Firmicutes.c__Clostridia.o__Clostridiales.f__Clostridiaceae.g__Clostridium_sensu_stricto_1.s__metagenome	2.68014	M.CRC	2.08258	0.0265131
d__Bacteria.p__Firmicutes.c__Bacilli.o__Lactobacillales.f__Streptococcaceae.g__Streptococcus.s__Streptococcus_dysgalactiae	2.33174	F.CRC	2.04335	0.000112508		d__Bacteria.p__Firmicutes.c__Bacilli.o__Lactobacillales.f__Aerococcaceae.g__Facklamia.s__Facklamia_hominis	2.38526	M.CRC	2.07463	0.00196166
d__Bacteria.p__Firmicutes.c__Clostridia.o__Oscillospirales.f__Ruminococcaceae.g__Ruminococcus.s__Ruminococcus_sp_	2.23706	F.CRC	2.02878	1.52E-05		d__Bacteria.p__Actinobacteriota.c__Actinobacteria.o__Corynebacteriales.f__Corynebacteriaceae.g__Corynebacterium.s__Corynebacterium_jeikeium	2.34206	M.CRC	2.07184	0.00196166
d__Bacteria.p__Bacteroidota.c__Bacteroidia.o__Bacteroidales.f__Bacteroidaceae.g__Bacteroides.s__Bacteroides_plebeius	4.78285	F.Normal	4.47266	6.42E-14		d__Bacteria.p__Firmicutes.c__Negativicutes.o__Veillonellales_Selenomonadales.f__Veillonellaceae.g__Dialister.s__Dialister_micraerophilus	2.35218	M.CRC	2.0308	5.95E-05
d__Bacteria.p__Bacteroidota.c__Bacteroidia.o__Bacteroidales.f__Bacteroidaceae.g__Bacteroides.s__Bacteroides_vulgatus	4.784	F.Normal	4.45309	5.67E-14		d__Bacteria.p__Firmicutes.c__Clostridia.o__Peptostreptococcales_Tissierellales.f__Peptostreptococcales_Tissierellales.g__Anaerococcus.s__Anaerococcus_hydrogenalis	2.29397	M.CRC	2.02314	0.0116616
d__Bacteria.p__Bacteroidota.c__Bacteroidia.o__Bacteroidales.f__Bacteroidaceae.g__Bacteroides.s__Bacteroides_uniformis	4.46533	F.Normal	4.14682	7.34E-17		d__Bacteria.p__Firmicutes.c__Clostridia.o__Christensenellales.f__Christensenellaceae.g__Christensenellaceae_R_7_group.s__uncultured_prokaryote	2.88907	M.CRC	2.00736	0.0431354
d__Bacteria.p__Bacteroidota.c__Bacteroidia.o__Bacteroidales.f__Prevotellaceae.g__Prevotella.s__metagenome	4.41243	F.Normal	4.07256	0.00281665		d__Bacteria.p__Bacteroidota.c__Bacteroidia.o__Bacteroidales.f__Porphyromonadaceae.g__Porphyromonas.s__Porphyromonas_endodontalis	2.29056	M.CRC	2.00178	0.0159715
d__Bacteria.p__Bacteroidota.c__Bacteroidia.o__Bacteroidales.f__Bacteroidaceae.g__Bacteroides.s__Bacteroides_coprocola	4.22724	F.Normal	3.92409	5.07E-05		d__Bacteria.p__Actinobacteriota.c__Coriobacteriia.o__Coriobacteriales.f__Eggerthellaceae.g__Slackia.s__Slackia_exigua	2.35793	M.CRC	2.00017	0.00196166
d__Bacteria.p__Bacteroidota.c__Bacteroidia.o__Bacteroidales.f__Prevotellaceae.g__Prevotella.s__Prevotella_stercorea	4.04651	F.Normal	3.70673	0.0348925		d__Bacteria.p__Bacteroidota.c__Bacteroidia.o__Bacteroidales.f__Bacteroidaceae.g__Bacteroides.s__Bacteroides_plebeius	4.75572	M.Normal	4.46001	3.33E-17
d__Bacteria.p__Bacteroidota.c__Bacteroidia.o__Bacteroidales.f__Tannerellaceae.g__Parabacteroides.s__Parabacteroides_merdae	4.00486	F.Normal	3.69913	1.81E-14		d__Bacteria.p__Bacteroidota.c__Bacteroidia.o__Bacteroidales.f__Bacteroidaceae.g__Bacteroides.s__Bacteroides_vulgatus	4.70178	M.Normal	4.35435	8.82E-14
d__Bacteria.p__Bacteroidota.c__Bacteroidia.o__Bacteroidales.f__Bacteroidaceae.g__Bacteroides.s__Bacteroides_dorei	3.99592	F.Normal	3.67261	0.00675174		d__Bacteria.p__Bacteroidota.c__Bacteroidia.o__Bacteroidales.f__Prevotellaceae.g__Prevotella.s__metagenome	4.5898	M.Normal	4.2759	1.92E-05
d__Bacteria.p__Firmicutes.c__Negativicutes.o__Acidaminococcales.f__Acidaminococcaceae.g__Phascolarctobacterium.s__Phascolarctobacterium_faecium	3.9515	F.Normal	3.65031	1.81E-08		d__Bacteria.p__Bacteroidota.c__Bacteroidia.o__Bacteroidales.f__Bacteroidaceae.g__Bacteroides.s__Bacteroides_uniformis	4.26211	M.Normal	3.93524	1.13E-17
d__Bacteria.p__Firmicutes.c__Clostridia.o__Oscillospirales.f__Ruminococcaceae.g__Ruminococcus.s__Ruminococcus_bicirculans	4.02742	F.Normal	3.64584	1.94E-08		d__Bacteria.p__Bacteroidota.c__Bacteroidia.o__Bacteroidales.f__Bacteroidaceae.g__Bacteroides.s__Bacteroides_coprocola	4.22727	M.Normal	3.92279	1.02E-09
d__Bacteria.p__Firmicutes.c__Clostridia.o__Oscillospirales.f___Eubacterium__coprostanoligenes_group.g___Eubacterium__coprostanoligenes_group.s__gut_metagenome	4.00165	F.Normal	3.64459	2.00E-06		d__Bacteria.p__Bacteroidota.c__Bacteroidia.o__Bacteroidales.f__Bacteroidaceae.g__Bacteroides.s__Bacteroides_coprophilus	3.96564	M.Normal	3.6507	3.74E-05
d__Bacteria.p__Bacteroidota.c__Bacteroidia.o__Bacteroidales.f__Bacteroidaceae.g__Bacteroides.s__Bacteroides_coprophilus	3.94507	F.Normal	3.64032	0.000319195		d__Bacteria.p__Firmicutes.c__Clostridia.o__Oscillospirales.f___Eubacterium__coprostanoligenes_group.g___Eubacterium__coprostanoligenes_group.s__gut_metagenome	4.01107	M.Normal	3.6455	7.15E-10
d__Bacteria.p__Bacteroidota.c__Bacteroidia.o__Bacteroidales.f__Bacteroidaceae.g__Bacteroides.s__Bacteroides_stercoris	3.91355	F.Normal	3.63362	4.38E-07		d__Bacteria.p__Bacteroidota.c__Bacteroidia.o__Bacteroidales.f__Bacteroidaceae.g__Bacteroides.s__Bacteroides_stercoris	3.96372	M.Normal	3.64063	1.02E-08
d__Bacteria.p__Bacteroidota.c__Bacteroidia.o__Bacteroidales.f__Bacteroidaceae.g__Bacteroides.s__Bacteroides_ovatus	3.97942	F.Normal	3.61708	1.22E-11		d__Bacteria.p__Bacteroidota.c__Bacteroidia.o__Bacteroidales.f__Bacteroidaceae.g__Bacteroides.s__Bacteroides_ovatus	3.86277	M.Normal	3.56608	8.11E-15
d__Bacteria.p__Bacteroidota.c__Bacteroidia.o__Bacteroidales.f__Tannerellaceae.g__Parabacteroides.s__Parabacteroides_distasonis	3.95307	F.Normal	3.60311	3.90E-13		d__Bacteria.p__Bacteroidota.c__Bacteroidia.o__Bacteroidales.f__Tannerellaceae.g__Parabacteroides.s__Parabacteroides_merdae	3.87534	M.Normal	3.54958	5.83E-16
d__Bacteria.p__Proteobacteria.c__Gammaproteobacteria.o__Burkholderiales.f__Sutterellaceae.g__Sutterella.s__Sutterella_wadsworthensis	3.77253	F.Normal	3.45777	3.74E-05		d__Bacteria.p__Firmicutes.c__Clostridia.o__Oscillospirales.f__Ruminococcaceae.g__Ruminococcus.s__Ruminococcus_bicirculans	3.8642	M.Normal	3.54031	5.68E-12
d__Bacteria.p__Firmicutes.c__Clostridia.o__Lachnospirales.f__Lachnospiraceae.g__Lachnospira.s__uncultured_bacterium	3.84021	F.Normal	3.44808	2.21E-08		d__Bacteria.p__Bacteroidota.c__Bacteroidia.o__Bacteroidales.f__Tannerellaceae.g__Parabacteroides.s__Parabacteroides_distasonis	3.86992	M.Normal	3.52377	6.46E-17
d__Bacteria.p__Bacteroidota.c__Bacteroidia.o__Bacteroidales.f__Muribaculaceae.g__Muribaculaceae.s__uncultured_bacterium	3.77075	F.Normal	3.42174	0.00282292		d__Bacteria.p__Proteobacteria.c__Gammaproteobacteria.o__Burkholderiales.f__Sutterellaceae.g__Sutterella.s__Sutterella_wadsworthensis	3.81733	M.Normal	3.5134	7.74E-08
d__Bacteria.p__Firmicutes.c__Clostridia.o__Lachnospirales.f__Lachnospiraceae.g__Coprococcus.s__unidentified	3.70141	F.Normal	3.38703	1.18E-05		d__Bacteria.p__Bacteroidota.c__Bacteroidia.o__Bacteroidales.f__Muribaculaceae.g__Muribaculaceae.s__uncultured_bacterium	3.82319	M.Normal	3.51204	3.32E-05
d__Bacteria.p__Firmicutes.c__Clostridia.o__Lachnospirales.f__Lachnospiraceae.g___Eubacterium__ruminantium_group.s__uncultured_bacterium	3.69735	F.Normal	3.36054	4.06E-05		d__Bacteria.p__Bacteroidota.c__Bacteroidia.o__Bacteroidales.f__Bacteroidaceae.g__Bacteroides.s__Bacteroides_dorei	3.84602	M.Normal	3.50873	0.0402718
d__Bacteria.p__Firmicutes.c__Clostridia.o__Oscillospirales.f__Ruminococcaceae.g__Subdoligranulum.s__uncultured_bacterium	3.74729	F.Normal	3.35262	9.99E-11		d__Bacteria.p__Firmicutes.c__Clostridia.o__Lachnospirales.f__Lachnospiraceae.g__Lachnospira.s__uncultured_bacterium	3.87133	M.Normal	3.50796	6.86E-15
d__Bacteria.p__Bacteroidota.c__Bacteroidia.o__Bacteroidales.f__Bacteroidaceae.g__Bacteroides.s__Bacteroides_caccae	3.67367	F.Normal	3.33927	3.91E-08		d__Bacteria.p__Proteobacteria.c__Gammaproteobacteria.o__Burkholderiales.f__Sutterellaceae.g__Sutterella.s__uncultured_bacterium	3.83424	M.Normal	3.44645	0.0416827
d__Bacteria.p__Bacteroidota.c__Bacteroidia.o__Bacteroidales.f__Bacteroidaceae.g__Bacteroides.s__Bacteroides_thetaiotaomicron	3.70326	F.Normal	3.33784	3.22E-12		d__Bacteria.p__Bacteroidota.c__Bacteroidia.o__Bacteroidales.f__Prevotellaceae.g__Paraprevotella.s__uncultured_bacterium	3.66988	M.Normal	3.37688	1.32E-07
d__Bacteria.p__Bacteroidota.c__Bacteroidia.o__Bacteroidales.f__Prevotellaceae.g__Paraprevotella.s__uncultured_bacterium	3.59874	F.Normal	3.27809	2.45E-06		d__Bacteria.p__Firmicutes.c__Negativicutes.o__Acidaminococcales.f__Acidaminococcaceae.g__Phascolarctobacterium.s__Phascolarctobacterium_faecium	3.69791	M.Normal	3.37393	5.82E-06
d__Bacteria.p__Firmicutes.c__Clostridia.o__Oscillospirales.f__Oscillospiraceae.g__UCG_002.s__uncultured_organism	3.7872	F.Normal	3.22314	2.10E-06		d__Bacteria.p__Firmicutes.c__Clostridia.o__Oscillospirales.f__Oscillospiraceae.g__UCG_002.s__uncultured_organism	3.82085	M.Normal	3.33692	4.62E-08
d__Bacteria.p__Firmicutes.c__Clostridia.o__Lachnospirales.f__Lachnospiraceae.g__Lachnoclostridium.s__uncultured_organism	3.51597	F.Normal	3.17291	1.04E-13		d__Bacteria.p__Bacteroidota.c__Bacteroidia.o__Bacteroidales.f__Bacteroidaceae.g__Bacteroides.s__Bacteroides_thetaiotaomicron	3.6505	M.Normal	3.31277	7.16E-17
d__Bacteria.p__Bacteroidota.c__Bacteroidia.o__Bacteroidales.f__Rikenellaceae.g__Alistipes.s__Alistipes_shahii	3.41805	F.Normal	3.10985	5.57E-12		d__Bacteria.p__Firmicutes.c__Clostridia.o__Lachnospirales.f__Lachnospiraceae.g__Coprococcus.s__unidentified	3.56678	M.Normal	3.2701	1.26E-07
d__Bacteria.p__Bacteroidota.c__Bacteroidia.o__Bacteroidales.f__Marinifilaceae.g__Odoribacter.s__Odoribacter_splanchnicus	3.40603	F.Normal	3.08727	7.33E-11		d__Bacteria.p__Firmicutes.c__Clostridia.o__Lachnospirales.f__Lachnospiraceae.g___Eubacterium__ruminantium_group.s__uncultured_bacterium	3.60585	M.Normal	3.24803	9.69E-06
d__Bacteria.p__Firmicutes.c__Bacilli.o__Lactobacillales.f__Streptococcaceae.g__Streptococcus.s__Streptococcus_salivarius	3.60623	F.Normal	3.08133	2.42E-05		d__Bacteria.p__Bacteroidota.c__Bacteroidia.o__Bacteroidales.f__Bacteroidaceae.g__Bacteroides.s__Bacteroides_caccae	3.48379	M.Normal	3.14749	8.41E-09
d__Bacteria.p__Bacteroidota.c__Bacteroidia.o__Bacteroidales.f__Bacteroidaceae.g__Bacteroides.s__Bacteroides_cellulosilyticus	3.44225	F.Normal	3.07262	2.19E-06		d__Bacteria.p__Firmicutes.c__Clostridia.o__Oscillospirales.f__Ruminococcaceae.g__Subdoligranulum.s__uncultured_bacterium	3.61269	M.Normal	3.11609	5.27E-06
d__Bacteria.p__Firmicutes.c__Clostridia.o__Oscillospirales.f__Ruminococcaceae.g__Faecalibacterium.s__metagenome	3.50404	F.Normal	3.03105	0.000111204		d__Bacteria.p__Firmicutes.c__Clostridia.o__Lachnospirales.f__Lachnospiraceae.g__Lachnoclostridium.s__uncultured_organism	3.53411	M.Normal	3.1074	3.08E-12
d__Bacteria.p__Firmicutes.c__Clostridia.o__Lachnospirales.f__Lachnospiraceae.g__Lachnospiraceae_NK4A136_group.s__uncultured_organism	3.34615	F.Normal	3.02908	1.56E-15		d__Bacteria.p__Proteobacteria.c__Gammaproteobacteria.o__Burkholderiales.f__Sutterellaceae.g__Sutterella.s__gut_metagenome	3.36142	M.Normal	3.03134	1.95E-05
d__Bacteria.p__Firmicutes.c__Clostridia.o__Oscillospirales.f__Ruminococcaceae.g___Eubacterium__siraeum_group.s___Eubacterium__siraeum	3.39757	F.Normal	3.0173	0.00597351		d__Bacteria.p__Bacteroidota.c__Bacteroidia.o__Bacteroidales.f__Marinifilaceae.g__Odoribacter.s__Odoribacter_splanchnicus	3.35727	M.Normal	3.0191	1.31E-14
d__Bacteria.p__Firmicutes.c__Clostridia.o__Oscillospirales.f__Oscillospiraceae.g__UCG_005.s__uncultured_organism	3.41025	F.Normal	3.00977	2.90E-06		d__Bacteria.p__Firmicutes.c__Clostridia.o__Lachnospirales.f__Lachnospiraceae.g__Lachnospiraceae_NK4A136_group.s__uncultured_organism	3.37029	M.Normal	3.01801	7.70E-13
d__Bacteria.p__Firmicutes.c__Clostridia.o__Oscillospirales.f__Oscillospiraceae.g__UCG_003.s__uncultured_organism	3.41702	F.Normal	2.99681	2.77E-07		d__Bacteria.p__Firmicutes.c__Clostridia.o__Oscillospirales.f__Oscillospiraceae.g__UCG_003.s__uncultured_organism	3.4142	M.Normal	3.00161	1.21E-08
d__Bacteria.p__Firmicutes.c__Negativicutes.o__Veillonellales_Selenomonadales.f__Veillonellaceae.g__Dialister.s__Dialister_sp_	3.32045	F.Normal	2.99233	0.025762		d__Bacteria.p__Bacteroidota.c__Bacteroidia.o__Bacteroidales.f__Rikenellaceae.g__Alistipes.s__Alistipes_onderdonkii	3.31838	M.Normal	2.98551	1.40E-06
d__Bacteria.p__Firmicutes.c__Bacilli.o__Erysipelotrichales.f__Erysipelotrichaceae.g__Holdemanella.s__uncultured_bacterium	3.488	F.Normal	2.95238	0.0330041		d__Bacteria.p__Bacteroidota.c__Bacteroidia.o__Bacteroidales.f__Rikenellaceae.g__Alistipes.s__Alistipes_shahii	3.28875	M.Normal	2.96865	3.64E-12
d__Bacteria.p__Bacteroidota.c__Bacteroidia.o__Bacteroidales.f__Rikenellaceae.g__Alistipes.s__Alistipes_onderdonkii	3.412	F.Normal	2.95159	2.34E-05		d__Bacteria.p__Firmicutes.c__Bacilli.o__Erysipelotrichales.f__Erysipelotrichaceae.g__Holdemanella.s__uncultured_bacterium	3.53505	M.Normal	2.95218	0.0137729
d__Bacteria.p__Firmicutes.c__Negativicutes.o__Veillonellales_Selenomonadales.f__Veillonellaceae.g__Dialister.s__Dialister_invisus	3.25712	F.Normal	2.94655	0.00238458		d__Bacteria.p__Firmicutes.c__Clostridia.o__Oscillospirales.f__Oscillospiraceae.g__UCG_005.s__uncultured_organism	3.43684	M.Normal	2.90539	0.000437197
d__Bacteria.p__Firmicutes.c__Clostridia.o__Oscillospirales.f__Oscillospiraceae.g__NK4A214_group.s__metagenome	3.29779	F.Normal	2.94288	9.88E-07		d__Bacteria.p__Firmicutes.c__Clostridia.o__Oscillospirales.f__Ruminococcaceae.g__uncultured.s__gut_metagenome	3.24473	M.Normal	2.87357	0.00418713
d__Bacteria.p__Proteobacteria.c__Gammaproteobacteria.o__Burkholderiales.f__Sutterellaceae.g__Sutterella.s__gut_metagenome	3.2816	F.Normal	2.93234	0.00619713		d__Bacteria.p__Bacteroidota.c__Bacteroidia.o__Bacteroidales.f__Bacteroidaceae.g__Bacteroides.s__Bacteroides_xylanisolvens	3.17582	M.Normal	2.86865	1.69E-05
d__Bacteria.p__Firmicutes.c__Clostridia.o__Oscillospirales.f__Ruminococcaceae.g__uncultured.s__gut_metagenome	3.25811	F.Normal	2.9201	0.000506481		d__Bacteria.p__Firmicutes.c__Clostridia.o__Oscillospirales.f__Oscillospiraceae.g__NK4A214_group.s__metagenome	3.22873	M.Normal	2.83855	5.48E-05
d__Bacteria.p__Firmicutes.c__Clostridia.o__Clostridia_UCG_014.f__Clostridia_UCG_014.g__Clostridia_UCG_014.s__gut_metagenome	3.24951	F.Normal	2.91676	0.0149012		d__Bacteria.p__Firmicutes.c__Clostridia.o__Oscillospirales.f__Oscillospiraceae.g__Oscillibacter.s__uncultured_organism	3.16135	M.Normal	2.81587	5.09E-15
d__Bacteria.p__Bacteroidota.c__Bacteroidia.o__Bacteroidales.f__Bacteroidaceae.g__Bacteroides.s__Bacteroides_finegoldii	3.18141	F.Normal	2.90284	0.00408779		d__Bacteria.p__Firmicutes.c__Negativicutes.o__Veillonellales_Selenomonadales.f__Veillonellaceae.g__Dialister.s__Dialister_sp_	3.1073	M.Normal	2.78662	0.00871015
d__Bacteria.p__Firmicutes.c__Clostridia.o__Lachnospirales.f__Lachnospiraceae.g__Lachnospiraceae_UCG_001.s__metagenome	3.20493	F.Normal	2.8921	1.30E-06		d__Bacteria.p__Firmicutes.c__Clostridia.o__Oscillospirales.f__Ruminococcaceae.g__CAG_352.s__uncultured_bacterium	3.36499	M.Normal	2.7819	0.0190834
d__Bacteria.p__Firmicutes.c__Clostridia.o__Oscillospirales.f__Oscillospiraceae.g__Oscillibacter.s__uncultured_organism	3.22076	F.Normal	2.88733	3.00E-11		d__Bacteria.p__Bacteroidota.c__Bacteroidia.o__Bacteroidales.f__Prevotellaceae.g__Prevotella.s__uncultured_Wautersiella	3.10036	M.Normal	2.77666	0.00795693
d__Bacteria.p__Proteobacteria.c__Gammaproteobacteria.o__Pasteurellales.f__Pasteurellaceae.g__Haemophilus.s__Haemophilus_parainfluenzae	3.41763	F.Normal	2.8863	7.61E-06		d__Bacteria.p__Firmicutes.c__Clostridia.o__Oscillospirales.f__UCG_010.g__UCG_010.s__uncultured_bacterium	3.11149	M.Normal	2.77509	2.60E-05
d__Bacteria.p__Firmicutes.c__Clostridia.o__Oscillospirales.f__UCG_010.g__UCG_010.s__uncultured_bacterium	3.12473	F.Normal	2.81299	6.66E-05		d__Bacteria.p__Firmicutes.c__Clostridia.o__Clostridia_UCG_014.f__Clostridia_UCG_014.g__Clostridia_UCG_014.s__gut_metagenome	3.08373	M.Normal	2.76813	0.000544544
d__Bacteria.p__Firmicutes.c__Clostridia.o__Oscillospirales.f__Ruminococcaceae.g___Eubacterium__siraeum_group.s__uncultured_bacterium	3.05975	F.Normal	2.77973	0.000869257		d__Bacteria.p__Firmicutes.c__Clostridia.o__Lachnospirales.f__Lachnospiraceae.g__Roseburia.s__Roseburia_hominis	3.05209	M.Normal	2.76566	9.48E-11
d__Bacteria.p__Firmicutes.c__Clostridia.o__Oscillospirales.f__Butyricicoccaceae.g__Butyricicoccus.s__uncultured_bacterium	3.11932	F.Normal	2.76102	6.95E-09		d__Bacteria.p__Firmicutes.c__Clostridia.o__Lachnospirales.f__Lachnospiraceae.g__Lachnospiraceae_UCG_001.s__metagenome	3.05342	M.Normal	2.7595	2.49E-07
d__Bacteria.p__Proteobacteria.c__Gammaproteobacteria.o__Burkholderiales.f__Sutterellaceae.g__Parasutterella.s__uncultured_bacterium	3.04298	F.Normal	2.7536	0.00116903		d__Bacteria.p__Proteobacteria.c__Gammaproteobacteria.o__Pasteurellales.f__Pasteurellaceae.g__Haemophilus.s__Haemophilus_parainfluenzae	3.36382	M.Normal	2.75641	4.17E-06
d__Bacteria.p__Firmicutes.c__Clostridia.o__Monoglobales.f__Monoglobaceae.g__Monoglobus.s__uncultured_organism	3.06285	F.Normal	2.73675	5.59E-13		d__Bacteria.p__Firmicutes.c__Clostridia.o__Oscillospirales.f__Butyricicoccaceae.g__Butyricicoccus.s__uncultured_bacterium	3.11861	M.Normal	2.75095	2.89E-11
d__Bacteria.p__Firmicutes.c__Clostridia.o__Lachnospirales.f__Lachnospiraceae.g__Lachnospiraceae_UCG_003.s__uncultured_bacterium	3.04064	F.Normal	2.73044	0.00296352		d__Bacteria.p__Firmicutes.c__Clostridia.o__Oscillospirales.f__Ruminococcaceae.g__Faecalibacterium.s__metagenome	3.30519	M.Normal	2.71743	0.000692841
d__Bacteria.p__Firmicutes.c__Clostridia.o__Oscillospirales.f__Oscillospiraceae.g__UCG_002.s__uncultured_rumen	3.24455	F.Normal	2.71627	5.11E-05		d__Bacteria.p__Bacteroidota.c__Bacteroidia.o__Bacteroidales.f__Bacteroidaceae.g__Bacteroides.s__Bacteroides_cellulosilyticus	3.09069	M.Normal	2.71651	5.14E-06
d__Bacteria.p__Bacteroidota.c__Bacteroidia.o__Bacteroidales.f__Bacteroidaceae.g__Bacteroides.s__Bacteroides_eggerthii	3.02124	F.Normal	2.68373	0.0172269		d__Bacteria.p__Bacteroidota.c__Bacteroidia.o__Bacteroidales.f__Tannerellaceae.g__Parabacteroides.s__Parabacteroides_goldsteinii	3.1338	M.Normal	2.70764	0.000411548
d__Bacteria.p__Firmicutes.c__Clostridia.o__Lachnospirales.f__Lachnospiraceae.g__Roseburia.s__Roseburia_hominis	3.18064	F.Normal	2.66955	4.29E-07		d__Bacteria.p__Bacteroidota.c__Bacteroidia.o__Bacteroidales.f__Bacteroidaceae.g__Bacteroides.s__Bacteroides_intestinalis	3.04054	M.Normal	2.69819	0.00185036
d__Bacteria.p__Firmicutes.c__Bacilli.o__Lactobacillales.f__Lactobacillaceae.g__Lactobacillus.s__Lactobacillus_ruminis	2.96806	F.Normal	2.64985	0.00583147		d__Bacteria.p__Firmicutes.c__Clostridia.o__Lachnospirales.f__Lachnospiraceae.g__Lachnospiraceae_UCG_001.s__Lachnospiraceae_bacterium	2.90688	M.Normal	2.62379	0.000206265
d__Bacteria.p__Bacteroidota.c__Bacteroidia.o__Bacteroidales.f__Rikenellaceae.g__Alistipes.s__Alistipes_finegoldii	2.95763	F.Normal	2.61345	0.00221335		d__Bacteria.p__Firmicutes.c__Clostridia.o__Oscillospirales.f__Oscillospiraceae.g__UCG_002.s__uncultured_rumen	3.13456	M.Normal	2.57453	5.89E-05
d__Bacteria.p__Firmicutes.c__Clostridia.o__Lachnospirales.f__Lachnospiraceae.g__Lachnospiraceae_UCG_001.s__Lachnospiraceae_bacterium	2.89463	F.Normal	2.57848	0.000484717		d__Bacteria.p__Firmicutes.c__Negativicutes.o__Veillonellales_Selenomonadales.f__Veillonellaceae.g__Dialister.s__uncultured_bacterium	3.21013	M.Normal	2.56651	0.0395405
d__Bacteria.p__Bacteroidota.c__Bacteroidia.o__Bacteroidales.f__Barnesiellaceae.g__Barnesiella.s__uncultured_bacterium	2.81446	F.Normal	2.54973	0.0148312		d__Bacteria.p__Bacteroidota.c__Bacteroidia.o__Bacteroidales.f__Bacteroidaceae.g__Bacteroides.s__Bacteroides_finegoldii	2.91787	M.Normal	2.56305	0.000327306
d__Bacteria.p__Bacteroidota.c__Bacteroidia.o__Bacteroidales.f__Rikenellaceae.g__Alistipes.s__Alistipes_obesi	2.84521	F.Normal	2.54356	2.77E-06		d__Bacteria.p__Firmicutes.c__Clostridia.o__Lachnospirales.f__Lachnospiraceae.g__Lachnospiraceae_UCG_003.s__uncultured_bacterium	2.86659	M.Normal	2.55585	0.000646525
d__Bacteria.p__Bacteroidota.c__Bacteroidia.o__Bacteroidales.f__Bacteroidaceae.g__Bacteroides.s__Bacteroides_xylanisolvens	2.90773	F.Normal	2.5371	0.00154918		d__Bacteria.p__Firmicutes.c__Clostridia.o__Clostridia_vadinBB60_group.f__Clostridia_vadinBB60_group.g__Clostridia_vadinBB60_group.s__uncultured_bacterium	2.8128	M.Normal	2.52799	4.20E-05
d__Bacteria.p__Bacteroidota.c__Bacteroidia.o__Bacteroidales.f__Tannerellaceae.g__Parabacteroides.s__Parabacteroides_goldsteinii	2.81152	F.Normal	2.51301	7.63E-06		d__Bacteria.p__Bacteroidota.c__Bacteroidia.o__Bacteroidales.f__Prevotellaceae.g__Prevotella.s__uncultured_bacterium	2.87495	M.Normal	2.52454	0.000104753
d__Bacteria.p__Bacteroidota.c__Bacteroidia.o__Bacteroidales.f__Bacteroidaceae.g__Bacteroides.s__Bacteroides_intestinalis	2.83478	F.Normal	2.49009	0.0177581		d__Bacteria.p__Firmicutes.c__Bacilli.o__Lactobacillales.f__Lactobacillaceae.g__Lactobacillus.s__Lactobacillus_ruminis	2.83961	M.Normal	2.52127	0.0408432
d__Bacteria.p__Firmicutes.c__Clostridia.o__Lachnospirales.f__Lachnospiraceae.g__Tyzzerella.s__unidentified	2.74665	F.Normal	2.45807	2.98E-06		d__Bacteria.p__Proteobacteria.c__Gammaproteobacteria.o__Burkholderiales.f__Sutterellaceae.g__Parasutterella.s__uncultured_bacterium	2.89205	M.Normal	2.51369	0.00131562
d__Bacteria.p__Bacteroidota.c__Bacteroidia.o__Bacteroidales.f__Marinifilaceae.g__Butyricimonas.s__uncultured_organism	2.75082	F.Normal	2.45171	0.000318649		d__Bacteria.p__Bacteroidota.c__Bacteroidia.o__Bacteroidales.f__Barnesiellaceae.g__Coprobacter.s__uncultured_organism	2.82348	M.Normal	2.48944	0.0308028
d__Bacteria.p__Firmicutes.c__Clostridia.o__Lachnospirales.f__Lachnospiraceae.g__CAG_56.s__uncultured_bacterium	2.90155	F.Normal	2.44897	2.32E-05		d__Bacteria.p__Firmicutes.c__Clostridia.o__Monoglobales.f__Monoglobaceae.g__Monoglobus.s__uncultured_organism	2.94373	M.Normal	2.47811	3.80E-07
d__Bacteria.p__Bacteroidota.c__Bacteroidia.o__Bacteroidales.f__Bacteroidaceae.g__Bacteroides.s__Bacteroides_caecigallinarum	2.73563	F.Normal	2.43115	0.0172269		d__Bacteria.p__Firmicutes.c__Clostridia.o__Oscillospirales.f__Oscillospiraceae.g__NK4A214_group.s__uncultured_rumen	2.82429	M.Normal	2.46391	0.000639949
d__Bacteria.p__Firmicutes.c__Clostridia.o__Oscillospirales.f__Oscillospiraceae.g__uncultured.s__Clostridium_sp_	2.7219	F.Normal	2.41966	8.64E-11		d__Bacteria.p__Bacteroidota.c__Bacteroidia.o__Bacteroidales.f__Rikenellaceae.g__Alistipes.s__Alistipes_finegoldii	2.76213	M.Normal	2.45886	8.20E-05
d__Bacteria.p__Firmicutes.c__Clostridia.o__Oscillospirales.f__Oscillospiraceae.g__NK4A214_group.s__uncultured_rumen	2.84162	F.Normal	2.40831	0.00404283		d__Bacteria.p__Firmicutes.c__Clostridia.o__Oscillospirales.f__UCG_010.g__UCG_010.s__metagenome	2.72565	M.Normal	2.44448	9.52E-06
d__Bacteria.p__Firmicutes.c__Clostridia.o__Clostridia_vadinBB60_group.f__Clostridia_vadinBB60_group.g__Clostridia_vadinBB60_group.s__uncultured_bacterium	2.79387	F.Normal	2.38581	0.0016268		d__Bacteria.p__Bacteroidota.c__Bacteroidia.o__Bacteroidales.f__Marinifilaceae.g__Butyricimonas.s__uncultured_bacterium	2.73364	M.Normal	2.42656	2.17E-06
d__Bacteria.p__Firmicutes.c__Clostridia.o__Oscillospirales.f__Ruminococcaceae.g__uncultured.s__uncultured_bacterium	2.69174	F.Normal	2.36653	1.01E-08		d__Bacteria.p__Bacteroidota.c__Bacteroidia.o__Bacteroidales.f__Rikenellaceae.g__Alistipes.s__Alistipes_obesi	2.749	M.Normal	2.41452	7.69E-08
d__Bacteria.p__Bacteroidota.c__Bacteroidia.o__Bacteroidales.f__Marinifilaceae.g__Butyricimonas.s__uncultured_bacterium	2.67393	F.Normal	2.35744	4.15E-05		d__Bacteria.p__Firmicutes.c__Clostridia.o__Oscillospirales.f__Ruminococcaceae.g__uncultured.s__human_gut	2.70067	M.Normal	2.4112	7.90E-13
d__Bacteria.p__Bacteroidota.c__Bacteroidia.o__Bacteroidales.f__Rikenellaceae.g__Alistipes.s__Alistipes_indistinctus	2.62992	F.Normal	2.35667	1.29E-05		d__Bacteria.p__Firmicutes.c__Clostridia.o__Oscillospirales.f__Oscillospiraceae.g__uncultured.s__Clostridium_sp_	2.70165	M.Normal	2.40472	4.79E-13
d__Bacteria.p__Firmicutes.c__Clostridia.o__Lachnospirales.f__Lachnospiraceae.g___Ruminococcus__torques_group.s__Ruminococcus_lactaris	2.81207	F.Normal	2.35216	1.27E-05		d__Bacteria.p__Bacteroidota.c__Bacteroidia.o__Bacteroidales.f__Bacteroidaceae.g__Bacteroides.s__Bacteroides_salyersiae	2.79592	M.Normal	2.39857	0.0178548
d__Bacteria.p__Firmicutes.c__Bacilli.o__RF39.f__RF39.g__RF39.s__uncultured_bacterium	2.62408	F.Normal	2.3496	8.39E-06		d__Bacteria.p__Bacteroidota.c__Bacteroidia.o__Bacteroidales.f__Bacteroidaceae.g__Bacteroides.s__Bacteroides_caecigallinarum	2.70171	M.Normal	2.3937	0.0028836
d__Bacteria.p__Firmicutes.c__Clostridia.o__Oscillospirales.f__UCG_010.g__UCG_010.s__metagenome	2.65099	F.Normal	2.34722	0.000204186		d__Bacteria.p__Firmicutes.c__Bacilli.o__RF39.f__RF39.g__RF39.s__uncultured_bacterium	2.69485	M.Normal	2.39281	1.45E-07
d__Bacteria.p__Bacteroidota.c__Bacteroidia.o__Bacteroidales.f__Rikenellaceae.g__Alistipes.s__Alistipes_sp_	2.65228	F.Normal	2.3252	5.79E-05		d__Bacteria.p__Firmicutes.c__Clostridia.o__Clostridia_vadinBB60_group.f__Clostridia_vadinBB60_group.g__Clostridia_vadinBB60_group.s__gut_metagenome	2.73871	M.Normal	2.38349	0.000117086
d__Bacteria.p__Firmicutes.c__Clostridia.o__Oscillospirales.f__Oscillospiraceae.g__Colidextribacter.s__uncultured_organism	2.72853	F.Normal	2.32445	5.82E-08		d__Bacteria.p__Bacteroidota.c__Bacteroidia.o__Bacteroidales.f__Marinifilaceae.g__Butyricimonas.s__uncultured_organism	2.65772	M.Normal	2.37701	3.96E-06
d__Bacteria.p__Firmicutes.c__Clostridia.o__Lachnospirales.f__Lachnospiraceae.g__uncultured.s__metagenome	2.63048	F.Normal	2.32109	5.42E-06		d__Bacteria.p__Firmicutes.c__Clostridia.o__Lachnospirales.f__Lachnospiraceae.g__Tyzzerella.s__unidentified	2.63223	M.Normal	2.32747	4.53E-07
d__Bacteria.p__Firmicutes.c__Clostridia.o__Clostridia_vadinBB60_group.f__Clostridia_vadinBB60_group.g__Clostridia_vadinBB60_group.s__gut_metagenome	2.57601	F.Normal	2.31876	2.10E-05		d__Bacteria.p__Bacteroidota.c__Bacteroidia.o__Bacteroidales.f__Rikenellaceae.g__Alistipes.s__Alistipes_indistinctus	2.61265	M.Normal	2.32171	8.64E-06
d__Bacteria.p__Firmicutes.c__Clostridia.o__Lachnospirales.f__Lachnospiraceae.g__Lachnospiraceae_UCG_010.s__uncultured_organism	3.07047	F.Normal	2.31824	2.78E-05		d__Bacteria.p__Bacteroidota.c__Bacteroidia.o__Bacteroidales.f__Tannerellaceae.g__Parabacteroides.s__uncultured_bacterium	2.61639	M.Normal	2.31917	0.0460104
d__Bacteria.p__Firmicutes.c__Negativicutes.o__Acidaminococcales.f__Acidaminococcaceae.g__Succiniclasticum.s__uncultured_bacterium	2.59309	F.Normal	2.26772	0.00748075		d__Bacteria.p__Firmicutes.c__Clostridia.o__Oscillospirales.f__Ruminococcaceae.g___Eubacterium__siraeum_group.s__uncultured_bacterium	2.6409	M.Normal	2.31848	0.010681
d__Bacteria.p__Firmicutes.c__Clostridia.o__Lachnospirales.f__Lachnospiraceae.g__Lachnospiraceae_NK4A136_group.s__uncultured_Clostridium	2.54537	F.Normal	2.24362	9.34E-07		d__Bacteria.p__Firmicutes.c__Clostridia.o__Christensenellales.f__Christensenellaceae.g__Christensenellaceae_R_7_group.s__uncultured_spirochete	2.76515	M.Normal	2.30277	0.0414019
d__Bacteria.p__Firmicutes.c__Clostridia.o__Oscillospirales.f__Ruminococcaceae.g__uncultured.s__human_gut	2.5594	F.Normal	2.24038	5.60E-07		d__Bacteria.p__Firmicutes.c__Clostridia.o__Oscillospirales.f__UCG_010.g__UCG_010.s__gut_metagenome	2.6057	M.Normal	2.30163	0.000867896
d__Bacteria.p__Firmicutes.c__Clostridia.o__Christensenellales.f__Christensenellaceae.g__Christensenellaceae_R_7_group.s__uncultured_prokaryote	2.93385	F.Normal	2.23055	0.000702985		d__Bacteria.p__Firmicutes.c__Clostridia.o__Oscillospirales.f__Oscillospiraceae.g__UCG_005.s__uncultured_bacterium	2.77176	M.Normal	2.29214	0.000551321
d__Bacteria.p__Firmicutes.c__Clostridia.o__Peptostreptococcales_Tissierellales.f__Anaerovoracaceae.g__Family_XIII_AD3011_group.s__uncultured_organism	2.73118	F.Normal	2.22772	9.37E-06		d__Bacteria.p__Firmicutes.c__Clostridia.o__Lachnospirales.f__Lachnospiraceae.g__uncultured.s__uncultured_organism	2.72032	M.Normal	2.28193	0.000355862
d__Bacteria.p__Bacteroidota.c__Bacteroidia.o__Bacteroidales.f__Barnesiellaceae.g__Coprobacter.s__uncultured_organism	2.51734	F.Normal	2.22536	0.018105		d__Bacteria.p__Bacteroidota.c__Bacteroidia.o__Bacteroidales.f__Rikenellaceae.g__Alistipes.s__Bacteroides_sp_	2.55116	M.Normal	2.27317	0.000119925
d__Bacteria.p__Firmicutes.c__Clostridia.o__Lachnospirales.f__Lachnospiraceae.g__Lachnospiraceae_UCG_010.s__uncultured_bacterium	2.53067	F.Normal	2.21312	8.63E-12		d__Bacteria.p__Firmicutes.c__Clostridia.o__Oscillospirales.f__Oscillospiraceae.g__Colidextribacter.s__uncultured_organism	2.7041	M.Normal	2.26015	1.60E-08
d__Bacteria.p__Firmicutes.c__Clostridia.o__Lachnospirales.f__Lachnospiraceae.g___Eubacterium__ventriosum_group.s__uncultured_bacterium	2.52272	F.Normal	2.20652	1.62E-06		d__Bacteria.p__Firmicutes.c__Clostridia.o__Lachnospirales.f__Lachnospiraceae.g__Lachnospiraceae_UCG_010.s__uncultured_organism	2.97978	M.Normal	2.2371	2.56E-05
d__Bacteria.p__Bacteroidota.c__Bacteroidia.o__Bacteroidales.f__Bacteroidaceae.g__Bacteroides.s__Bacteroides_nordii	2.49583	F.Normal	2.20097	0.000107584		d__Bacteria.p__Firmicutes.c__Clostridia.o__Lachnospirales.f__Lachnospiraceae.g__Lachnospiraceae_NK4A136_group.s__metagenome	2.5647	M.Normal	2.20744	0.00705646
d__Bacteria.p__Firmicutes.c__Clostridia.o__Oscillospirales.f__Ruminococcaceae.g__UBA1819.s__uncultured_organism	2.71601	F.Normal	2.19704	1.43E-05		d__Bacteria.p__Firmicutes.c__Clostridia.o__Peptostreptococcales_Tissierellales.f__Anaerovoracaceae.g__Family_XIII_AD3011_group.s__uncultured_organism	2.73426	M.Normal	2.20346	7.05E-07
d__Bacteria.p__Bacteroidota.c__Bacteroidia.o__Bacteroidales.f__Rikenellaceae.g__Alistipes.s__Bacteroides_sp_	2.51201	F.Normal	2.15075	0.0225522		d__Bacteria.p__Bacteroidota.c__Bacteroidia.o__Bacteroidales.f__Bacteroidaceae.g__Bacteroides.s__Bacteroides_clarus	2.49578	M.Normal	2.16995	0.0174794
d__Bacteria.p__Firmicutes.c__Clostridia.o__Oscillospirales.f__Oscillospiraceae.g__UCG_005.s__uncultured_bacterium	2.70943	F.Normal	2.14041	0.00513645		d__Bacteria.p__Firmicutes.c__Clostridia.o__Lachnospirales.f__Lachnospiraceae.g__uncultured.s__metagenome	2.6261	M.Normal	2.16299	4.76E-05
d__Bacteria.p__Firmicutes.c__Clostridia.o__Oscillospirales.f__UCG_010.g__UCG_010.s__gut_metagenome	2.51862	F.Normal	2.12947	0.0421669		d__Bacteria.p__Firmicutes.c__Clostridia.o__Lachnospirales.f__Lachnospiraceae.g__Lachnospiraceae_UCG_010.s__uncultured_bacterium	2.46853	M.Normal	2.1548	3.15E-14
d__Bacteria.p__Firmicutes.c__Clostridia.o__Lachnospirales.f__Lachnospiraceae.g__Roseburia.s__uncultured_Roseburia	2.57398	F.Normal	2.11071	0.0235593		d__Bacteria.p__Firmicutes.c__Clostridia.o__Oscillospirales.f__Ruminococcaceae.g__uncultured.s__uncultured_bacterium	2.55744	M.Normal	2.15112	2.15E-08
d__Bacteria.p__Firmicutes.c__Clostridia.o__Oscillospirales.f__Oscillospiraceae.g__UCG_003.s__uncultured_bacterium	2.39985	F.Normal	2.10705	0.000249715		d__Bacteria.p__Firmicutes.c__Bacilli.o__Erysipelotrichales.f__Erysipelatoclostridiaceae.g__UCG_004.s__uncultured_bacterium	2.42899	M.Normal	2.14672	0.000129126
d__Bacteria.p__Firmicutes.c__Bacilli.o__RF39.f__RF39.g__RF39.s__gut_metagenome	2.39134	F.Normal	2.10179	0.000514279		d__Bacteria.p__Firmicutes.c__Clostridia.o__Lachnospirales.f__Lachnospiraceae.g__Lachnospiraceae_NK4A136_group.s__uncultured_Clostridium	2.49886	M.Normal	2.1445	2.82E-06
d__Bacteria.p__Firmicutes.c__Clostridia.o__Oscillospirales.f__Oscillospiraceae.g__UCG_005.s__gut_metagenome	2.67617	F.Normal	2.09899	0.00084242		d__Bacteria.p__Firmicutes.c__Bacilli.o__Izemoplasmatales.f__Izemoplasmatales.g__Izemoplasmatales.s__gut_metagenome	2.3999	M.Normal	2.136	0.00461838
d__Bacteria.p__Firmicutes.c__Bacilli.o__Erysipelotrichales.f__Erysipelatoclostridiaceae.g__UCG_004.s__uncultured_bacterium	2.39148	F.Normal	2.08489	0.00348281		d__Bacteria.p__Firmicutes.c__Clostridia.o__Oscillospirales.f__Oscillospiraceae.g__NK4A214_group.s__gut_metagenome	2.46511	M.Normal	2.13488	0.0156367
d__Bacteria.p__Firmicutes.c__Clostridia.o__Monoglobales.f__Monoglobaceae.g__Monoglobus.s__uncultured_bacterium	2.38286	F.Normal	2.06669	0.000430362		d__Bacteria.p__Bacteroidota.c__Bacteroidia.o__Bacteroidales.f__Barnesiellaceae.g__Barnesiella.s__uncultured_bacterium	2.39308	M.Normal	2.09833	0.00300996
d__Bacteria.p__Bacteroidota.c__Bacteroidia.o__Bacteroidales.f__Tannerellaceae.g__Parabacteroides.s__Parabacteroides_sp_	2.37296	F.Normal	2.06552	0.00806747		d__Bacteria.p__Bacteroidota.c__Bacteroidia.o__Bacteroidales.f__Rikenellaceae.g__Alistipes.s__Alistipes_sp_	2.43426	M.Normal	2.09108	0.000105835
d__Bacteria.p__Firmicutes.c__Bacilli.o__RF39.f__RF39.g__RF39.s__human_gut	2.36894	F.Normal	2.0435	0.0190259		d__Bacteria.p__Firmicutes.c__Clostridia.o__Lachnospirales.f__Lachnospiraceae.g___Eubacterium__ventriosum_group.s__uncultured_bacterium	2.42281	M.Normal	2.09015	1.54E-07
d__Bacteria.p__Firmicutes.c__Clostridia.o__Oscillospirales.f__Ruminococcaceae.g__Incertae_Sedis.s___Clostridium__leptum	2.33031	F.Normal	2.03069	0.00122397		d__Bacteria.p__Verrucomicrobiota.c__Lentisphaeria.o__Victivallales.f__Victivallaceae.g__Victivallis.s__Victivallis_vadensis	2.36078	M.Normal	2.0812	0.000516072
d__Bacteria.p__Bacteroidota.c__Bacteroidia.o__Bacteroidales.f__Muribaculaceae.g__Muribaculaceae.s__uncultured_Porphyromonadaceae	2.26513	F.Normal	2.01937	7.03E-05		d__Bacteria.p__Firmicutes.c__Bacilli.o__Erysipelotrichales.f__Erysipelotrichaceae.g__Faecalitalea.s__Absiella_argi	2.45293	M.Normal	2.07545	0.0497966
						d__Bacteria.p__Firmicutes.c__Clostridia.o__Lachnospirales.f__Lachnospiraceae.g__CAG_56.s__uncultured_bacterium	2.78516	M.Normal	2.03844	0.000350457

## Sheet: Table S5
Supplementary Table S5. The alpha diversity of microbial clusters by stage based on gender in CRC patients
Sample-id	Observed features	Chao1 index	Shannon's index	Simpson's index	Pielou's evenness	group_type
322035	31	32.4286	1.3665	0.362525	0.275828	F.CRC_Stage2
347423	105	105	5.04243	0.929281	0.751004	F.CRC_Stage1
361833	130	142.353	4.23918	0.851523	0.603668	M.CRC_Stage2
370083	198	227.176	5.54322	0.921915	0.726565	F.CRC_Stage1
450834	236	265.118	6.22503	0.967101	0.789714	M.CRC_Stage3
468931	141	149.885	4.65096	0.878547	0.651436	M.CRC_Stage1
468963	61	70.5455	2.4035	0.617541	0.405262	F.CRC_Stage1
19756484	155	161.067	5.61504	0.945773	0.771707	M.CRC_Stage1
467498	81	85.5	4.26321	0.884725	0.672446	F.CRC_Stage1
18803921	145	148.438	5.52735	0.952154	0.769836	F.CRC_Stage1
17667711	144	152.571	5.12181	0.912672	0.714346	M.CRC_Stage1
19540038	35	35	3.15994	0.751237	0.61606	M.CRC_Stage1
17347257	63	64.5	4.44475	0.920211	0.743607	M.CRC_Stage1
18740107	76	76.375	4.53125	0.92339	0.72524	F.CRC_Stage1
19485542	68	68	5.51063	0.970981	0.905243	F.CRC_Stage1
10760448	127	128.111	5.64859	0.952966	0.808249	F.CRC_Stage1
456567	127	133.429	5.67524	0.962295	0.812062	M.CRC_Stage1
506507	74	75.2	4.69479	0.927533	0.756071	F.CRC_Stage1
10040959	65	71	2.93995	0.669799	0.488172	M.CRC_Stage1
10074983	193	206.034	6.15162	0.971613	0.810228	M.CRC_Stage3
10112195	145	150.526	5.41886	0.936989	0.754725	M.CRC_Stage1
10355257	143	145.143	5.91265	0.965969	0.825804	M.CRC_Stage2
10633630	107	117.909	4.34648	0.900986	0.644738	M.CRC_Stage2
10735682	49	51	2.88834	0.741438	0.514424	F.CRC_Stage2
10786589	79	87.5	3.039	0.791412	0.482091	M.CRC_Stage1
10850985	171	193.235	5.87769	0.967201	0.79237	F.CRC_Stage2
10974898	28	30.5	2.04116	0.678505	0.42459	M.CRC_Stage2
10996704	110	117.059	4.70866	0.917248	0.694354	M.CRC_Stage3
11132008	115	125.5	5.14075	0.943446	0.750969	F.CRC_Stage2
11359740	130	137.5	4.92006	0.91708	0.700626	M.CRC_Stage3
16511459	41	42.5	2.65333	0.749593	0.49525	F.CRC_Stage1
16647606	126	138.364	5.42624	0.955164	0.777701	M.CRC_Stage3
16920705	175	188.053	4.71656	0.896489	0.632992	M.CRC_Stage3
16959020	249	280.571	6.12133	0.960858	0.769011	F.CRC_Stage3
17033387	119	122	5.15728	0.935542	0.747993	F.CRC_Stage3
17069401	136	155.25	5.5838	0.961106	0.787841	F.CRC_Stage2
17190468	134	157.077	5.23182	0.937055	0.740412	M.CRC_Stage3
17491123	125	148	5.5378	0.96482	0.795001	F.CRC_Stage3
17663524	129	130.071	5.73904	0.9656	0.81855	F.CRC_Stage3
17704122	51	51.4615	3.05675	0.771166	0.538879	M.CRC_Stage3
17973120	182	198.235	6.03797	0.967349	0.804227	M.CRC_Stage1
18155660	152	157.571	5.94298	0.967581	0.819955	M.CRC_Stage2
18310575	116	125.562	4.92526	0.932795	0.71818	F.CRC_Stage3
18438846	202	235.476	6.20341	0.974913	0.810034	F.CRC_Stage3
18522424	100	109.067	4.05316	0.884918	0.610062	M.CRC_Stage2
18620791	177	192.333	5.74464	0.948358	0.769275	M.CRC_Stage3
18903667	146	154.261	5.8195	0.97067	0.809408	M.CRC_Stage3
19177764	116	142.4	4.3929	0.891612	0.640553	M.CRC_Stage3
19423777	135	168.067	5.14194	0.944258	0.726589	M.CRC_Stage1
19476175	129	136.5	4.98935	0.927883	0.711623	M.CRC_Stage1
19737250	61	64.6	3.25252	0.799668	0.548418	F.CRC_Stage2
19740744	44	46.5455	1.11852	0.2577	0.204878	F.CRC_Stage2
19828808	50	53.5	2.24192	0.597187	0.397232	M.CRC_Stage3
19829135	20	21	2.64868	0.77552	0.612846	M.CRC_Stage2
19830700	133	150.273	5.06025	0.922511	0.717228	F.CRC_Stage1
19836717	132	138	5.53294	0.953316	0.785438	F.CRC_Stage1
19837933	116	125.625	4.47131	0.884286	0.651987	M.CRC_Stage3
19840760	88	98.9091	3.92247	0.841277	0.607246	M.CRC_Stage3
19841184	160	169.545	5.77285	0.958296	0.788433	M.CRC_Stage1
19846049	52	52	4.50865	0.924889	0.790929	M.CRC_Stage2
19847156	130	137.773	4.23121	0.880021	0.602533	M.CRC_Stage2
19847886	87	87.3333	4.95634	0.94271	0.769267	F.CRC_Stage2
11144342	46	47.5	2.42463	0.607871	0.438962	F.CRC_Stage2
19576772	164	170	5.50259	0.926429	0.747883	M.CRC_Stage2
19590336	109	114.6	5.2393	0.948149	0.774107	F.CRC_Stage2
349011	171	182	5.7227	0.959297	0.771477	M.CRC_Stage2
17439860	119	119.25	5.35279	0.944353	0.77635	M.CRC_Stage2
10249840	77	78	4.94089	0.925345	0.788425	M.CRC_Stage2
417340	84	84.75	3.63317	0.788691	0.568364	M.CRC_Stage2
18822597	42	42.1667	1.9637	0.483176	0.364166	M.CRC_Stage2
19012627	143	147.667	6.12688	0.975161	0.855725	M.CRC_Stage2
10136540	186	197.875	6.32155	0.974878	0.838495	M.CRC_Stage2
19445582	96	96	5.72578	0.96632	0.869524	M.CRC_Stage2
471082	88	88	5.11829	0.936501	0.792374	F.CRC_Stage2
19010025	125	128	5.57296	0.955941	0.800048	M.CRC_Stage2
430592	46	46	4.78401	0.946923	0.866109	M.CRC_Stage3
399610	118	118.6	5.70559	0.967973	0.828983	M.CRC_Stage3
19504049	158	160.25	6.14041	0.972932	0.840717	M.CRC_Stage3
19078850	145	147.154	6.14019	0.976328	0.85519	M.CRC_Stage3
11294843	55	55	3.10729	0.71971	0.537467	F.CRC_Stage3
19472717	10	10	1.22697	0.410803	0.369354	F.CRC_Stage3
16857845	150	157.5	5.21089	0.892215	0.72085	F.CRC_Stage3
313848	31	31.5	1.92874	0.445493	0.389315	M.CRC_Stage3
428069	69	73.4	2.89525	0.741808	0.473969	M.CRC_Stage3
10875814	83	85.1429	4.83048	0.941734	0.757717	F.CRC_Stage3
19593289	124	137	5.41029	0.943149	0.777989	M.CRC_Stage3
379119	16	16.5	0.532657	0.12105	0.133164	F.CRC_Stage3
409698	35	35	3.57426	0.815766	0.696833	M.CRC_Stage3
400004	92	92.2	5.52111	0.95507	0.846334	F.CRC_Stage3

## Sheet: Table S6
Supplementary Table S6.The differences in overall microbial taxonomic group based on gender and stage in CRC patients
(A)The differences in overall microbial taxonomic group based on gender and stage in female CRC patients samples						(B)The differences in overall microbial taxonomic group based on gender and stage in male CRC patients samples
Feature	Value	Group	LDA_score	P-value		Feature	Value	Group	LDA_score	P-value
d__Bacteria.p__Proteobacteria.c__Gammaproteobacteria.o__Enterobacterales.f__Enterobacteriaceae	5.21004	F.CRC_Stage2	4.84914	0.010266		d__Bacteria.p__Firmicutes.c__Clostridia.o__Peptostreptococcales_Tissierellales	5.50962	M.CRC_Stage3	4.76779	0.0420733
d__Bacteria.p__Firmicutes.c__Bacilli.o__Staphylococcales.f__Staphylococcaceae.g__Staphylococcus	3.51899	F.CRC_Stage2	3.19576	0.0186948		d__Bacteria.p__Proteobacteria.c__Gammaproteobacteria.o__Enterobacterales.f__Enterobacteriaceae.g__Enterobacter	4.37417	M.CRC_Stage1	4.06002	0.025889
d__Bacteria.p__Proteobacteria.c__Alphaproteobacteria	3.90227	F.CRC_Stage2	3.67359	0.00127002		d__Bacteria.p__Bacteroidota.c__Bacteroidia.o__Sphingobacteriales	4.31949	M.CRC_Stage1	4.03355	0.000260726
d__Bacteria.p__Proteobacteria.c__Gammaproteobacteria.o__Burkholderiales.f__Comamonadaceae	4.00935	F.CRC_Stage2	3.78224	0.00181501		d__Bacteria.p__Bacteroidota.c__Bacteroidia.o__Sphingobacteriales.f__Sphingobacteriaceae	4.31949	M.CRC_Stage1	4.03355	0.000275966
d__Bacteria.p__Proteobacteria.c__Alphaproteobacteria.o__Rhizobiales.f__Rhizobiaceae.g__Ensifer	3.25872	F.CRC_Stage2	3.03087	0.0249175		d__Bacteria.p__Bacteroidota.c__Bacteroidia.o__Sphingobacteriales.f__Sphingobacteriaceae.g__Sphingobacterium	4.31761	M.CRC_Stage1	4.03143	0.000275966
d__Bacteria.p__Proteobacteria.c__Gammaproteobacteria.o__Pseudomonadales.f__Moraxellaceae.g__Psychrobacter	3.14163	F.CRC_Stage2	2.91989	0.00846748		d__Bacteria.p__Actinobacteriota.c__Actinobacteria.o__Corynebacteriales.f__Nocardiaceae.g__Rhodococcus	4.13385	M.CRC_Stage1	3.90332	0.000301718
d__Bacteria.p__Proteobacteria.c__Gammaproteobacteria.o__Xanthomonadales.f__Xanthomonadaceae	3.95078	F.CRC_Stage2	3.72447	0.0132764		d__Bacteria.p__Actinobacteriota.c__Actinobacteria.o__Corynebacteriales.f__Nocardiaceae	4.13385	M.CRC_Stage1	3.90331	0.000301718
d__Bacteria.p__Proteobacteria.c__Alphaproteobacteria.o__Rhizobiales.f__Rhizobiaceae	3.60105	F.CRC_Stage2	3.37305	0.0292327		d__Bacteria.p__Proteobacteria.c__Gammaproteobacteria.o__Burkholderiales.f__Comamonadaceae	4.11195	M.CRC_Stage1	3.83301	0.000245875
d__Bacteria.p__Proteobacteria.c__Gammaproteobacteria.o__Enterobacterales	5.21442	F.CRC_Stage2	4.85563	0.010266		d__Bacteria.p__Proteobacteria.c__Gammaproteobacteria.o__Burkholderiales	4.20679	M.CRC_Stage1	3.8181	0.0408194
d__Bacteria.p__Proteobacteria.c__Alphaproteobacteria.o__Caulobacterales.f__Caulobacteraceae.g__Brevundimonas	2.9941	F.CRC_Stage2	2.77261	0.00776292		d__Bacteria.p__Proteobacteria.c__Gammaproteobacteria.o__Burkholderiales.f__Comamonadaceae.g__Delftia	4.09397	M.CRC_Stage1	3.81553	0.000260726
d__Bacteria.p__Bacteroidota.c__Bacteroidia.o__Sphingobacteriales	4.20785	F.CRC_Stage2	3.98037	0.00155398		d__Bacteria.p__Proteobacteria.c__Gammaproteobacteria.o__Xanthomonadales	4.06972	M.CRC_Stage1	3.76719	0.0010144
d__Bacteria.p__Proteobacteria.c__Alphaproteobacteria.o__Rhizobiales.f__Devosiaceae	3.43052	F.CRC_Stage2	3.20555	0.00615838		d__Bacteria.p__Proteobacteria.c__Gammaproteobacteria.o__Xanthomonadales.f__Xanthomonadaceae	4.06972	M.CRC_Stage1	3.76719	0.0010144
d__Bacteria.p__Proteobacteria.c__Gammaproteobacteria.o__Pseudomonadales.f__Moraxellaceae.g__Acinetobacter	2.56912	F.CRC_Stage2	2.42866	0.0343702		d__Bacteria.p__Proteobacteria.c__Gammaproteobacteria.o__Xanthomonadales.f__Xanthomonadaceae.g__Stenotrophomonas	4.06905	M.CRC_Stage1	3.76663	0.0009784
d__Bacteria.p__Proteobacteria.c__Gammaproteobacteria.o__Xanthomonadales	3.95078	F.CRC_Stage2	3.72445	0.0132764		d__Bacteria.p__Proteobacteria.c__Alphaproteobacteria.o__Rhizobiales	3.80403	M.CRC_Stage1	3.5346	0.00455958
d__Bacteria.p__Bacteroidota.c__Bacteroidia.o__Bacteroidales.f__Prevotellaceae.g__Prevotella	5.01911	F.CRC_Stage3	4.6644	0.0147554		d__Bacteria.p__Firmicutes.c__Clostridia.o__Lachnospirales.f__Lachnospiraceae.g__Anaerostipes	3.71856	M.CRC_Stage1	3.34125	0.0228258
d__Bacteria.p__Firmicutes.c__Clostridia.o__Peptostreptococcales_Tissierellales.f__Peptostreptococcales_Tissierellales.g__Finegoldia.s__Finegoldia_magna	2.25407	F.CRC_Stage3	2.10527	0.0474807		d__Bacteria.p__Actinobacteriota.c__Actinobacteria.o__Actinomycetales.f__Actinomycetaceae.g__Mobiluncus	3.64276	M.CRC_Stage3	3.33288	0.00240727
d__Bacteria.p__Proteobacteria.c__Gammaproteobacteria.o__Xanthomonadales.f__Xanthomonadaceae.g__Stenotrophomonas	3.95078	F.CRC_Stage2	3.72445	0.0132764		d__Bacteria.p__Firmicutes.c__Clostridia.o__Clostridia.f__Hungateiclostridiaceae	3.64849	M.CRC_Stage3	3.30255	0.049338
d__Bacteria.p__Bacteroidota.c__Bacteroidia.o__Sphingobacteriales.f__Sphingobacteriaceae	4.20785	F.CRC_Stage2	3.98037	0.00155398		d__Bacteria.p__Firmicutes.c__Clostridia.o__Clostridia	3.64849	M.CRC_Stage3	3.29452	0.049338
d__Bacteria.p__Firmicutes.c__Bacilli.o__Staphylococcales.f__Staphylococcaceae	3.51899	F.CRC_Stage2	3.19486	0.0186948		d__Bacteria.p__Proteobacteria.c__Alphaproteobacteria.o__Rhizobiales.f__Rhizobiaceae	3.53574	M.CRC_Stage1	3.26803	9.27E-05
d__Bacteria.p__Proteobacteria.c__Alphaproteobacteria.o__Rhizobiales	3.83285	F.CRC_Stage2	3.60556	0.00406513		d__Bacteria.p__Proteobacteria.c__Gammaproteobacteria.o__Aeromonadales	3.49434	M.CRC_Stage1	3.11872	2.51E-05
d__Bacteria.p__Proteobacteria.c__Gammaproteobacteria.o__Pseudomonadales.f__Moraxellaceae	3.24461	F.CRC_Stage2	3.02161	0.00934749		d__Bacteria.p__Proteobacteria.c__Alphaproteobacteria.o__Rhizobiales.f__Devosiaceae	3.37456	M.CRC_Stage1	3.10105	0.00294398
d__Bacteria.p__Actinobacteriota.c__Actinobacteria.o__Actinomycetales.f__Actinomycetaceae.g__Mobiluncus	3.62206	F.CRC_Stage3	3.2358	0.0474807		d__Bacteria.p__Proteobacteria.c__Alphaproteobacteria.o__Rhizobiales.f__Devosiaceae.g__Devosia	3.37456	M.CRC_Stage1	3.10105	0.00294398
d__Bacteria.p__Proteobacteria.c__Alphaproteobacteria.o__Caulobacterales.f__Caulobacteraceae	2.9941	F.CRC_Stage2	2.77259	0.00776292		d__Bacteria.p__Proteobacteria.c__Gammaproteobacteria.o__Pseudomonadales.f__Moraxellaceae	3.30406	M.CRC_Stage1	2.99921	0.0235782
d__Bacteria.p__Bacteroidota.c__Bacteroidia.o__Bacteroidales.f__Prevotellaceae.g__Prevotella.s__Massiliprevotella_massiliensis	3.91198	F.CRC_Stage1	3.53433	0.0474807		d__Bacteria.p__Proteobacteria.c__Alphaproteobacteria.o__Rhizobiales.f__Rhizobiaceae.g__Pseudochrobactrum	3.21829	M.CRC_Stage1	2.96217	0.00226212
d__Bacteria.p__Firmicutes.c__Clostridia.o__Oscillospirales.f__Oscillospiraceae.g__UCG_002.s__uncultured_organism	3.78033	F.CRC_Stage1	3.31881	0.0379898		d__Bacteria.p__Proteobacteria.c__Gammaproteobacteria.o__Aeromonadales.f__Aeromonadaceae.g__Aeromonas	3.25429	M.CRC_Stage1	2.94652	0.00328998
d__Bacteria.p__Bacteroidota.c__Bacteroidia.o__Bacteroidales.f__Prevotellaceae	5.03612	F.CRC_Stage3	4.68118	0.0148831		d__Bacteria.p__Proteobacteria.c__Gammaproteobacteria.o__Aeromonadales.f__Aeromonadaceae	3.25429	M.CRC_Stage1	2.94652	0.00328998
d__Bacteria.p__Bacteroidota.c__Bacteroidia.o__Bacteroidales.f__Prevotellaceae.g__Prevotella.s__Prevotella_stercorea	3.4996	F.CRC_Stage1	3.16428	0.015222		d__Bacteria.p__Firmicutes.c__Negativicutes.o__Veillonellales_Selenomonadales.f__Selenomonadaceae.g__uncultured	3.38357	M.CRC_Stage1	2.91876	0.0402215
d__Bacteria.p__Proteobacteria.c__Gammaproteobacteria	5.32246	F.CRC_Stage2	4.97534	0.013668		d__Bacteria.p__Synergistota.c__Synergistia	3.18998	M.CRC_Stage3	2.90263	0.0356874
d__Bacteria.p__Proteobacteria	5.33866	F.CRC_Stage2	4.99648	0.0124602		d__Bacteria.p__Synergistota	3.18998	M.CRC_Stage3	2.89231	0.0356874
d__Bacteria.p__Proteobacteria.c__Alphaproteobacteria.o__Rhizobiales.f__Devosiaceae.g__Devosia	3.43052	F.CRC_Stage2	3.20553	0.00615838		d__Bacteria.p__Synergistota.c__Synergistia.o__Synergistales.f__Synergistaceae	3.18998	M.CRC_Stage3	2.89228	0.0356874
d__Bacteria.p__Firmicutes.c__Clostridia.o__Oscillospirales.f__Oscillospiraceae.g__UCG_005.s__uncultured_organism	3.109	F.CRC_Stage1	2.83731	0.014036		d__Bacteria.p__Proteobacteria.c__Alphaproteobacteria.o__Rhizobiales.f__Rhizobiaceae.g__Ensifer	3.15954	M.CRC_Stage1	2.88823	0.000891776
d__Bacteria.p__Actinobacteriota.c__Actinobacteria.o__Corynebacteriales.f__Nocardiaceae	4.16648	F.CRC_Stage2	3.93586	0.00406505		d__Bacteria.p__Synergistota.c__Synergistia.o__Synergistales	3.18998	M.CRC_Stage3	2.87887	0.0356874
d__Bacteria.p__Firmicutes.c__Clostridia.o__Peptostreptococcales_Tissierellales.f__Anaerovoracaceae.g__Family_XIII_AD3011_group.s__uncultured_organism	2.80543	F.CRC_Stage1	2.53419	0.00456429		d__Bacteria.p__Proteobacteria.c__Gammaproteobacteria.o__Pseudomonadales.f__Moraxellaceae.g__Psychrobacter	3.14331	M.CRC_Stage1	2.85179	0.00294398
d__Bacteria.p__Proteobacteria.c__Alphaproteobacteria.o__Caulobacterales	2.9941	F.CRC_Stage2	2.77174	0.00776292		d__Bacteria.p__Bacteroidota.c__Bacteroidia.o__Flavobacteriales	2.94912	M.CRC_Stage1	2.66413	0.0128973
d__Bacteria.p__Firmicutes.c__Clostridia.o__Oscillospirales.f___Eubacterium__coprostanoligenes_group.g___Eubacterium__coprostanoligenes_group	3.82485	F.CRC_Stage1	3.43373	0.0242565		d__Bacteria.p__Proteobacteria.c__Gammaproteobacteria.o__Aeromonadales.f__Succinivibrionaceae	3.12236	M.CRC_Stage1	2.64545	0.00736119
d__Bacteria.p__Desulfobacterota.c__Desulfovibrionia.o__Desulfovibrionales.f__Desulfovibrionaceae.g__Desulfovibrio	2.81367	F.CRC_Stage1	2.57823	0.0499374		d__Bacteria.p__Proteobacteria.c__Alphaproteobacteria.o__Caulobacterales.f__Caulobacteraceae	2.9674	M.CRC_Stage1	2.64361	0.0191532
d__Bacteria.p__Firmicutes.c__Clostridia.o__Oscillospirales.f___Eubacterium__coprostanoligenes_group	3.82485	F.CRC_Stage1	3.42843	0.0242565		d__Bacteria.p__Proteobacteria.c__Alphaproteobacteria.o__Caulobacterales	2.9674	M.CRC_Stage1	2.64063	0.0191532
d__Bacteria.p__Desulfobacterota.c__Desulfovibrionia.o__Desulfovibrionales.f__Desulfovibrionaceae.g__Desulfovibrio.s__Desulfovibrio_piger	2.61491	F.CRC_Stage1	2.45067	0.0474807		d__Bacteria.p__Proteobacteria.c__Gammaproteobacteria.o__Aeromonadales.f__Succinivibrionaceae.g__Succinivibrio	3.12236	M.CRC_Stage1	2.63655	0.00736119
d__Bacteria.p__Proteobacteria.c__Gammaproteobacteria.o__Burkholderiales.f__Comamonadaceae.g__Delftia	3.99324	F.CRC_Stage2	3.76609	0.00192541		d__Bacteria.p__Bacteroidota.c__Bacteroidia.o__Flavobacteriales.f__Flavobacteriaceae	2.87636	M.CRC_Stage2	2.59466	0.00493972
d__Bacteria.p__Bacteroidota.c__Bacteroidia.o__Sphingobacteriales.f__Sphingobacteriaceae.g__Sphingobacterium	4.20399	F.CRC_Stage2	3.97651	0.00155398		d__Bacteria.p__Actinobacteriota.c__Actinobacteria.o__Micrococcales.f__Sanguibacteraceae	2.6342	M.CRC_Stage1	2.34843	0.00736119
d__Bacteria.p__Bacteroidota.c__Bacteroidia.o__Sphingobacteriales.f__Sphingobacteriaceae.g__Sphingobacterium.s__Sphingobacterium_faecium	4.18426	F.CRC_Stage2	3.95673	0.00155398		d__Bacteria.p__Actinobacteriota.c__Actinobacteria.o__Micrococcales.f__Sanguibacteraceae.g__Sanguibacter	2.6342	M.CRC_Stage1	2.3385	0.00736119
d__Bacteria.p__Proteobacteria.c__Gammaproteobacteria.o__Xanthomonadales.f__Xanthomonadaceae.g__Stenotrophomonas.s__Stenotrophomonas_rhizophila	3.89385	F.CRC_Stage2	3.66736	0.01029		d__Bacteria.p__Bacteroidota.c__Bacteroidia.o__Flavobacteriales.f__Flavobacteriaceae.g__Flavobacterium	2.52619	M.CRC_Stage1	2.21102	0.00163755
d__Bacteria.p__Proteobacteria.c__Gammaproteobacteria.o__Pseudomonadales.f__Moraxellaceae.g__Acinetobacter.s__Acinetobacter_lwoffii	2.56021	F.CRC_Stage2	2.42032	0.0343702		d__Bacteria.p__Actinobacteriota.c__Actinobacteria.o__Micrococcales.f__Micrococcaceae.g__Paeniglutamicibacter	2.37993	M.CRC_Stage1	2.09127	0.0402215
d__Bacteria.p__Actinobacteriota.c__Actinobacteria.o__Actinomycetales.f__Actinomycetaceae.g__Mobiluncus.s__Mobiluncus_curtisii	3.4878	F.CRC_Stage3	3.09876	0.0474807		d__Bacteria.p__Actinobacteriota.c__Actinobacteria.o__Corynebacteriales.f__Dietziaceae.g__Dietzia	2.33643	M.CRC_Stage1	2.05895	0.0402215
d__Bacteria.p__Actinobacteriota.c__Actinobacteria.o__Corynebacteriales.f__Nocardiaceae.g__Rhodococcus	4.16648	F.CRC_Stage2	3.93586	0.00406505		d__Bacteria.p__Actinobacteriota.c__Actinobacteria.o__Corynebacteriales.f__Dietziaceae	2.33643	M.CRC_Stage1	2.04457	0.0402215
						d__Bacteria.p__Firmicutes.c__Clostridia.o__Clostridia.f__Hungateiclostridiaceae.g__Fastidiosipila	3.64849	M.CRC_Stage3	3.28415	0.049338
						d__Bacteria.p__Firmicutes.c__Clostridia.o__Peptostreptococcales_Tissierellales.f__Peptostreptococcaceae.g__Intestinibacter	3.59205	M.CRC_Stage3	3.20058	0.0157112
						d__Bacteria.p__Firmicutes.c__Clostridia.o__Oscillospirales.f__Oscillospiraceae.g__uncultured	3.22899	M.CRC_Stage3	2.89683	0.01428
						d__Bacteria.p__Bacteroidota.c__Bacteroidia.o__Sphingobacteriales.f__Sphingobacteriaceae.g__Sphingobacterium.s__Sphingobacterium_faecium	4.29018	M.CRC_Stage1	4.00387	0.000275966
						d__Bacteria.p__Actinobacteriota.c__Actinobacteria.o__Corynebacteriales.f__Corynebacteriaceae.g__Corynebacterium.s__Corynebacterium_simulans	4.20425	M.CRC_Stage1	4.00005	0.039234
						d__Bacteria.p__Proteobacteria.c__Gammaproteobacteria.o__Xanthomonadales.f__Xanthomonadaceae.g__Stenotrophomonas.s__Stenotrophomonas_rhizophila	4.00655	M.CRC_Stage1	3.70764	0.00297662
						d__Bacteria.p__Firmicutes.c__Clostridia.o__Peptostreptococcales_Tissierellales.f__Peptostreptococcaceae.g__Peptostreptococcus.s__Peptostreptococcus_anaerobius	3.7917	M.CRC_Stage1	3.5174	0.00689396
						d__Bacteria.p__Firmicutes.c__Negativicutes.o__Veillonellales_Selenomonadales.f__Selenomonadaceae.g__uncultured.s__uncultured_rumen	3.32747	M.CRC_Stage1	2.85919	0.0402215
						d__Bacteria.p__Firmicutes.c__Clostridia.o__Lachnospirales.f__Lachnospiraceae.g__Lachnoclostridium.s__uncultured_organism	3.17995	M.CRC_Stage1	2.74525	0.047965
						d__Bacteria.p__Firmicutes.c__Bacilli.o__Staphylococcales.f__Staphylococcaceae.g__Staphylococcus.s__Staphylococcus_lugdunensis	2.74552	M.CRC_Stage1	2.5456	0.0402215
						d__Bacteria.p__Actinobacteriota.c__Actinobacteria.o__Micrococcales.f__Dermabacteraceae.g__Dermabacter.s__uncultured_bacterium	2.60821	M.CRC_Stage1	2.36151	0.0402215
						d__Bacteria.p__Firmicutes.c__Bacilli.o__Lactobacillales.f__Lactobacillaceae.g__Lactobacillus.s__Lactobacillus_ruminis	2.50463	M.CRC_Stage1	2.11761	0.0416101
						d__Bacteria.p__Actinobacteriota.c__Actinobacteria.o__Corynebacteriales.f__Dietziaceae.g__Dietzia.s__Dietzia_maris	2.33643	M.CRC_Stage1	2.06542	0.0402215
						d__Bacteria.p__Firmicutes.c__Bacilli.o__Lactobacillales.f__Streptococcaceae.g__Streptococcus.s__Streptococcus_sanguinis	3.13479	M.CRC_Stage2	2.81125	0.0285281
						d__Bacteria.p__Bacteroidota.c__Bacteroidia.o__Bacteroidales.f__Prevotellaceae.g__Prevotella.s__gut_metagenome	3.03288	M.CRC_Stage2	2.76793	0.0285281
						d__Bacteria.p__Actinobacteriota.c__Actinobacteria.o__Actinomycetales.f__Actinomycetaceae.g__Mobiluncus.s__Mobiluncus_curtisii	3.64189	M.CRC_Stage3	3.3358	0.00240727
						d__Bacteria.p__Firmicutes.c__Clostridia.o__Clostridia.f__Hungateiclostridiaceae.g__Fastidiosipila.s__Clostridiales_bacterium	3.63949	M.CRC_Stage3	3.28958	0.049338
						d__Bacteria.p__Proteobacteria.c__Gammaproteobacteria.o__Pseudomonadales.f__Pseudomonadaceae.g__Pseudomonas.s__Pseudomonas_veronii	3.36316	M.CRC_Stage3	3.03617	0.00825784
						d__Bacteria.p__Actinobacteriota.c__Actinobacteria.o__Corynebacteriales.f__Corynebacteriaceae.g__Corynebacterium.s__Corynebacterium_imitans	3.06577	M.CRC_Stage3	2.79547	0.0198143

## Sheet: TableS7
Supplementary Table S7. The microbiota genera with significant LDA score (p < 0.05) to clinical parameters across colorectal cancer patients, categorized by gender, cancer origin, and TNM group (T/TN)
(A) The microbiota genera with significant LDA score (p < 0.05) between the T and TN group of colorectal cancer derived from distal in female (F.Distal.T, TN)
Group	LDA_score	p.value	Taxon
F.Distal.T	4.61092	0.0222392	g__Escherichia_Shigella
F.Distal.T	3.85001	0.044553	g__Rhodococcus
F.Distal.T	3.39043	0.0339079	g__Gemella
F.Distal.TN	3.29991	0.0288052	g__Frisingicoccus
F.Distal.TN	2.96679	0.0288052	g__Eisenbergiella
(B) The microbiota genera with significant LDA score (p < 0.05) between the T and TN group of colorectal cancer derived from distal in male(M.Distal.T, TN)
Group	LDA_score	p.value	Taxon
M.Distal.T	4.31818	0.0460882	g__Streptococcus
M.Distal.T	4.0666	0.0291854	g__Cutibacterium
M.Distal.T	3.98082	0.00451773	g__Sphingobacterium
M.Distal.T	3.79094	0.00451773	g__Rhodococcus
M.Distal.T	3.69812	0.00451773	g__Delftia
M.Distal.T	3.64009	0.0084159	g__Stenotrophomonas
M.Distal.T	3.05267	0.0152592	g__Devosia
M.Distal.T	2.91026	0.0152592	g__Pseudochrobactrum
M.Distal.T	2.87439	0.0455316	g__Aeromonas
M.Distal.T	2.82543	0.0152592	g__Ensifer
M.Distal.T	2.79843	0.0152592	g__Psychrobacter
M.Distal.T	2.71143	0.0305053	g__Brevundimonas
M.Distal.T	2.57864	0.0152592	g__Acinetobacter
M.Distal.TN	3.84273	0.0189606	g__Anaerococcus
M.Distal.TN	3.53705	0.0208686	g__Christensenellaceae_R_7_group
M.Distal.TN	3.52857	0.0131762	g__Clostridia_vadinBB60_group
M.Distal.TN	3.42335	0.00798977	g__Mobiluncus
M.Distal.TN	3.02262	0.00158272	g__Pyramidobacter
M.Distal.TN	2.98489	0.00254001	f__Oscillospiraceae;g__uncultured
M.Distal.TN	2.92726	0.0468518	g__Cloacibacillus
M.Distal.TN	2.88625	0.00160468	g__Intestinibacter
M.Distal.TN	2.79324	0.0255808	g__Parabacteroides
M.Distal.TN	2.70095	0.00597035	f__Anaerovoracaceae;g__Family_XIII_UCG_001
M.Distal.TN	2.56041	0.0123438	g__Negativibacillus
M.Distal.TN	2.54534	0.0252422	g__Mogibacterium
M.Distal.TN	2.5288	0.0329053	g__Erysipelatoclostridium
M.Distal.TN	2.50429	0.0481339	g__Gallicola
M.Distal.TN	2.47506	0.0326391	f__Ruminococcaceae;g__uncultured
M.Distal.TN	2.37126	0.0329761	f__Eggerthellaceae;g__uncultured
M.Distal.TN	2.29322	0.00451868	g__Eubacterium
M.Distal.TN	2.29056	0.0329761	o__Oscillospirales;g__UCG_010
M.Distal.TN	2.25831	0.0329053	o__Coriobacteriales;g__uncultured
(C) The microbiota genera with significant LDA score (p < 0.05) between the T and TN group of colorectal cancer derived from proximal in male(M.proximal.T, TN)
Group	LDA_score	p.value	Taxon
F.Proximal.T	3.27311	0.00931441	g__Rhodococcus
F.Proximal.T	3.15939	0.00931441	g__Sphingobacterium
F.Proximal.T	3.05879	0.00320979	g__Delftia
F.Proximal.T	2.9417	0.0235941	g__Stenotrophomonas
F.Proximal.T	2.85804	0.0235941	g__Psychrobacter
F.Proximal.T	2.7929	0.0235941	g__Ensifer
F.Proximal.T	2.65553	0.00320979	g__Devosia
(D) The microbiota genera with significant LDA score (p < 0.05) between the T and TN group of colorectal cancer derived from proximal in male (M.proximal.T, TN)
Group	LDA_score	p.value	Taxon
M.Proximal.T	3.65821	0.0455161	g__Enterobacter
M.Proximal.T	3.41097	0.0496247	g__Aeromonas
M.Proximal.T	3.38635	0.0276947	g__Sphingobacterium
M.Proximal.T	3.38416	0.0496247	g__Flavonifractor
M.Proximal.T	3.34097	0.0496247	g__Stenotrophomonas
M.Proximal.T	3.2964	0.0148879	g__Delftia
M.Proximal.T	3.2772	0.0451424	g__Roseburia
M.Proximal.T	3.25754	0.0385962	g__Fusicatenibacter
M.Proximal.T	3.17907	0.0148879	g__Rhodococcus
M.Proximal.TN	4.45485	0.032088	g__Pseudomonas
M.Proximal.TN	3.45831	0.0238742	g__Mobiluncus

## Sheet: Table S8
Supplementary Table S8. The networks and correlations between microorganisms in colorectal cancer patients classified by gender, cancer origin, and TNM group (T/TN)
(A) Networks and correlations between microorganisms in colorectal cancer patients classified by TNM group (T/TN) in female						(B) Networks and correlations between microorganisms in colorectal cancer patients classified by TNM group (T/TN) in male						(C) Networks and correlations between microorganisms in colorectal cancer patients classified by TNM group (T/TN) in female						(D) Networks and correlations between microorganisms in colorectal cancer patients classified by TNM group (T/TN) in male
Group	Taxon1	Taxon2	Correlation	P.Value		Group	Taxon1	Taxon2	Correlation	P.Value		Group	Taxon1	Taxon2	Correlation	P.Value		Group	Taxon1	Taxon2	Correlation	P.Value
female_T_TN	__unclassification	g__Anaerococcus	-0.4514	0.0297		male T_TN	__unclassification	g__Aeromonas	0.4072	0.0198		female_proximal vs distal	__unclassification	g__Anaerococcus	-0.4419	0.0099		male_proximal vs distal	__unclassification	g__Porphyromonas	-0.4389	0.0099
female_T_TN	__unclassification	g__Campylobacter	-0.519	0.0297		male T_TN	__unclassification	g__Brevundimonas	0.4263	0.0099		female_proximal vs distal	__unclassification	g__Campylobacter	-0.501	0.0099		male_proximal vs distal	g__Aeromonas	g__Brevundimonas	0.738	0.0099
female_T_TN	__unclassification	g__Stenotrophomonas	0.4365	0.0297		male T_TN	__unclassification	g__Delftia	0.424	0.0198		female_proximal vs distal	__unclassification	g__Collinsella	-0.4076	0.0396		male_proximal vs distal	g__Aeromonas	g__Cutibacterium	0.4644	0.0099
female_T_TN	__unclassification	g__Varibaculum	-0.4485	0.0396		male T_TN	__unclassification	g__Fastidiosipila	-0.4066	0.0099		female_proximal vs distal	__unclassification	g__Lachnospira	0.4616	0.0099		male_proximal vs distal	g__Aeromonas	g__Delftia	0.8811	0.0099
female_T_TN	g__Acinetobacter	g__Aeromonas	0.7195	0.0099		male T_TN	__unclassification	g__Mobiluncus	-0.4422	0.0198		female_proximal vs distal	g__Actinomyces	g__Blautia	-0.4683	0.0099		male_proximal vs distal	g__Aeromonas	g__Enterobacter	0.7071	0.0099
female_T_TN	g__Acinetobacter	g__Campylobacter	-0.4735	0.0396		male T_TN	__unclassification	g__Porphyromonas	-0.4348	0.0198		female_proximal vs distal	g__Actinomyces	g__Corynebacterium	0.4112	0.0396		male_proximal vs distal	g__Aeromonas	g__Pseudomonas	0.5653	0.0099
female_T_TN	g__Acinetobacter	g__Collinsella	-0.4667	0.0099		male T_TN	__unclassification	g__Rhodococcus	0.4159	0.0099		female_proximal vs distal	g__Actinomyces	g__Eubacterium_hallii_group	-0.4536	0.0099		male_proximal vs distal	g__Aeromonas	g__Rhodococcus	0.8719	0.0099
female_T_TN	g__Acinetobacter	g__Coprococcus	-0.5311	0.0099		male T_TN	__unclassification	g__Sphingobacterium	0.4294	0.0099		female_proximal vs distal	g__Actinomyces	g__Lachnospira	-0.5033	0.0198		male_proximal vs distal	g__Aeromonas	g__Sphingobacterium	0.8973	0.0099
female_T_TN	g__Acinetobacter	g__Cutibacterium	0.4317	0.0099		male T_TN	__unclassification	g__Staphylococcus	0.4665	0.0297		female_proximal vs distal	g__Actinomyces	g__Lachnospiraceae_ND3007_group	-0.5125	0.0099		male_proximal vs distal	g__Aeromonas	g__Staphylococcus	0.4233	0.0099
female_T_TN	g__Acinetobacter	g__Delftia	0.689	0.0099		male T_TN	g__Actinomyces	g__Fastidiosipila	0.4878	0.0099		female_proximal vs distal	g__Actinomyces	g__Lawsonella	0.4672	0.0099		male_proximal vs distal	g__Agathobacter	g__Anaerococcus	-0.4253	0.0099
female_T_TN	g__Acinetobacter	g__Devosia	0.7143	0.0099		male T_TN	g__Actinomyces	g__Lawsonella	0.4483	0.0198		female_proximal vs distal	g__Actinomyces	g__Ruminococcus	-0.472	0.0099		male_proximal vs distal	g__Agathobacter	g__Anaerostipes	0.4084	0.0198
female_T_TN	g__Acinetobacter	g__Dorea	-0.4277	0.0495		male T_TN	g__Actinomyces	g__Negativicoccus	0.4052	0.0099		female_proximal vs distal	g__Actinomyces	g__Ruminococcus_gauvreauii_group	-0.5279	0.0099		male_proximal vs distal	g__Agathobacter	g__Blautia	0.5714	0.0099
female_T_TN	g__Acinetobacter	g__Ensifer	0.8087	0.0099		male T_TN	g__Aeromonas	__unclassification	0.4072	0.0198		female_proximal vs distal	g__Actinomyces	g__Solobacterium	0.4539	0.0099		male_proximal vs distal	g__Agathobacter	g__Faecalibacterium	0.5152	0.0099
female_T_TN	g__Acinetobacter	g__Enterobacter	0.6274	0.0099		male T_TN	g__Aeromonas	g__Brevundimonas	0.7268	0.0099		female_proximal vs distal	g__Actinomyces	g__Staphylococcus	0.4819	0.0099		male_proximal vs distal	g__Agathobacter	g__Fusicatenibacter	0.4642	0.0099
female_T_TN	g__Acinetobacter	g__Enterococcus	0.4087	0.0396		male T_TN	g__Aeromonas	g__Christensenellaceae_R_7_group	-0.4941	0.0099		female_proximal vs distal	g__Actinomyces	g__Varibaculum	0.463	0.0198		male_proximal vs distal	g__Agathobacter	g__Negativicoccus	-0.4252	0.0099
female_T_TN	g__Acinetobacter	g__Eubacterium_coprostanoligenes_group	-0.6068	0.0099		male T_TN	g__Aeromonas	g__Clostridia_UCG_014	-0.4497	0.0198		female_proximal vs distal	g__Agathobacter	g__Alistipes	-0.4006	0.0297		male_proximal vs distal	g__Alloprevotella	g__Catenibacterium	0.4278	0.0099
female_T_TN	g__Acinetobacter	g__Ezakiella	-0.4567	0.0297		male T_TN	g__Aeromonas	g__Collinsella	-0.4287	0.0396		female_proximal vs distal	g__Agathobacter	g__Corynebacterium	-0.4257	0.0198		male_proximal vs distal	g__Anaerococcus	g__Agathobacter	-0.4253	0.0099
female_T_TN	g__Acinetobacter	g__Faecalibacterium	-0.5699	0.0099		male T_TN	g__Aeromonas	g__Coprococcus	-0.4699	0.0099		female_proximal vs distal	g__Agathobacter	g__Dorea	0.5175	0.0099		male_proximal vs distal	g__Anaerococcus	g__Finegoldia	0.6501	0.0099
female_T_TN	g__Acinetobacter	g__Lachnoclostridium	-0.4056	0.0495		male T_TN	g__Aeromonas	g__Cutibacterium	0.4782	0.0099		female_proximal vs distal	g__Agathobacter	g__Eggerthella	-0.4445	0.0198		male_proximal vs distal	g__Anaerococcus	g__Lachnospiraceae_NK4A136_group	-0.4403	0.0099
female_T_TN	g__Acinetobacter	g__Lachnospiraceae_NK4A136_group	-0.499	0.0198		male T_TN	g__Aeromonas	g__Delftia	0.8602	0.0099		female_proximal vs distal	g__Agathobacter	g__Eubacterium_hallii_group	0.5311	0.0099		male_proximal vs distal	g__Anaerococcus	g__Murdochiella	0.4173	0.0099
female_T_TN	g__Acinetobacter	g__Pseudomonas	0.4028	0.0099		male T_TN	g__Aeromonas	g__Devosia	0.8584	0.0099		female_proximal vs distal	g__Agathobacter	g__Faecalibacterium	0.5132	0.0099		male_proximal vs distal	g__Anaerococcus	g__Negativicoccus	0.4754	0.0099
female_T_TN	g__Acinetobacter	g__Psychrobacter	0.7719	0.0099		male T_TN	g__Aeromonas	g__Ensifer	0.8055	0.0099		female_proximal vs distal	g__Agathobacter	g__Fusicatenibacter	0.4814	0.0099		male_proximal vs distal	g__Anaerococcus	g__Peptoniphilus	0.7617	0.0099
female_T_TN	g__Acinetobacter	g__Rhodococcus	0.6221	0.0099		male T_TN	g__Aeromonas	g__Enterobacter	0.6869	0.0099		female_proximal vs distal	g__Agathobacter	g__Lachnospira	0.592	0.0099		male_proximal vs distal	g__Anaerococcus	g__Ruminococcus	-0.4578	0.0099
female_T_TN	g__Acinetobacter	g__Sphingobacterium	0.6882	0.0099		male T_TN	g__Aeromonas	g__Intestinibacter	-0.4353	0.0099		female_proximal vs distal	g__Agathobacter	g__Lachnospiraceae_ND3007_group	0.5316	0.0099		male_proximal vs distal	g__Anaerostipes	g__Agathobacter	0.4084	0.0198
female_T_TN	g__Acinetobacter	g__Stenotrophomonas	0.6909	0.0099		male T_TN	g__Aeromonas	g__Negativibacillus	-0.4321	0.0198		female_proximal vs distal	g__Agathobacter	g__Lawsonella	-0.4176	0.0099		male_proximal vs distal	g__Bacteroides	g__Lachnoclostridium	0.4259	0.0099
female_T_TN	g__Acinetobacter	g__Sutterella	-0.4345	0.0099		male T_TN	g__Aeromonas	g__Parabacteroides	-0.5114	0.0099		female_proximal vs distal	g__Agathobacter	g__Ruminococcus_gauvreauii_group	0.4063	0.0198		male_proximal vs distal	g__Bifidobacterium	g__Blautia	0.4286	0.0099
female_T_TN	g__Acinetobacter	g__UCG_002	-0.5506	0.0198		male T_TN	g__Aeromonas	g__Pseudochrobactrum	0.8148	0.0099		female_proximal vs distal	g__Agathobacter	g__Solobacterium	-0.4692	0.0099		male_proximal vs distal	g__Bilophila	g__Parabacteroides	0.4227	0.0198
female_T_TN	g__Acinetobacter	g__uncultured	-0.5696	0.0297		male T_TN	g__Aeromonas	g__Pseudomonas	0.4346	0.0099		female_proximal vs distal	g__Agathobacter	g__Subdoligranulum	0.6665	0.0099		male_proximal vs distal	g__Blautia	g__Agathobacter	0.5714	0.0099
female_T_TN	g__Actinomyces	g__Blautia	-0.5709	0.0099		male T_TN	g__Aeromonas	g__Psychrobacter	0.7995	0.0099		female_proximal vs distal	g__Alistipes	g__Agathobacter	-0.4006	0.0297		male_proximal vs distal	g__Blautia	g__Bifidobacterium	0.4286	0.0099
female_T_TN	g__Actinomyces	g__Corynebacterium	0.5444	0.0198		male T_TN	g__Aeromonas	g__Rhodococcus	0.8593	0.0099		female_proximal vs distal	g__Alistipes	g__Gallicola	-0.492	0.0297		male_proximal vs distal	g__Blautia	g__Dorea	0.5203	0.0099
female_T_TN	g__Actinomyces	g__Eubacterium_coprostanoligenes_group	-0.402	0.0198		male T_TN	g__Aeromonas	g__Romboutsia	-0.433	0.0099		female_proximal vs distal	g__Alistipes	g__Murdochiella	-0.4555	0.0198		male_proximal vs distal	g__Blautia	g__Faecalibacterium	0.6294	0.0099
female_T_TN	g__Actinomyces	g__Eubacterium_hallii_group	-0.4292	0.0396		male T_TN	g__Aeromonas	g__Sphingobacterium	0.8799	0.0099		female_proximal vs distal	g__Alistipes	g__Parabacteroides	0.6365	0.0099		male_proximal vs distal	g__Blautia	g__Fusicatenibacter	0.4158	0.0099
female_T_TN	g__Actinomyces	g__Facklamia	0.4007	0.0297		male T_TN	g__Aeromonas	g__Staphylococcus	0.4414	0.0099		female_proximal vs distal	g__Alloprevotella	g__Bifidobacterium	-0.4583	0.0099		male_proximal vs distal	g__Brevundimonas	g__Aeromonas	0.738	0.0099
female_T_TN	g__Actinomyces	g__Faecalibacterium	-0.4546	0.0396		male T_TN	g__Aeromonas	g__Stenotrophomonas	0.8584	0.0099		female_proximal vs distal	g__Alloprevotella	g__Family_XIII_AD3011_group	0.4963	0.0099		male_proximal vs distal	g__Brevundimonas	g__Collinsella	-0.4555	0.0099
female_T_TN	g__Actinomyces	g__Lachnospira	-0.6357	0.0099		male T_TN	g__Aeromonas	g__uncultured	-0.5504	0.0099		female_proximal vs distal	g__Anaerococcus	__unclassification	-0.4419	0.0099		male_proximal vs distal	g__Brevundimonas	g__Coprococcus	-0.4479	0.0099
female_T_TN	g__Actinomyces	g__Lachnospiraceae_ND3007_group	-0.4578	0.0495		male T_TN	g__Agathobacter	g__Anaerostipes	0.4423	0.0099		female_proximal vs distal	g__Anaerococcus	g__Desulfovibrio	-0.4397	0.0198		male_proximal vs distal	g__Brevundimonas	g__Cutibacterium	0.6102	0.0099
female_T_TN	g__Actinomyces	g__Lawsonella	0.4916	0.0198		male T_TN	g__Agathobacter	g__Bifidobacterium	0.4276	0.0198		female_proximal vs distal	g__Anaerococcus	g__Finegoldia	0.653	0.0099		male_proximal vs distal	g__Brevundimonas	g__Delftia	0.7293	0.0099
female_T_TN	g__Actinomyces	g__Peptostreptococcus	0.443	0.0099		male T_TN	g__Agathobacter	g__Blautia	0.4422	0.0099		female_proximal vs distal	g__Anaerococcus	g__Lawsonella	0.443	0.0198		male_proximal vs distal	g__Brevundimonas	g__Enterobacter	0.5984	0.0099
female_T_TN	g__Actinomyces	g__Ruminococcus	-0.5836	0.0099		male T_TN	g__Agathobacter	g__Corynebacterium	-0.4072	0.0297		female_proximal vs distal	g__Anaerococcus	g__NK4A214_group	-0.4951	0.0198		male_proximal vs distal	g__Brevundimonas	g__Prevotella	-0.466	0.0099
female_T_TN	g__Actinomyces	g__Ruminococcus_gauvreauii_group	-0.4555	0.0396		male T_TN	g__Agathobacter	g__Faecalibacterium	0.4653	0.0099		female_proximal vs distal	g__Anaerococcus	g__Peptoniphilus	0.6325	0.0099		male_proximal vs distal	g__Brevundimonas	g__Pseudomonas	0.5748	0.0099
female_T_TN	g__Actinomyces	g__Ruminococcus_torques_group	-0.5631	0.0099		male T_TN	g__Agathobacter	g__Fusicatenibacter	0.4382	0.0099		female_proximal vs distal	g__Anaerococcus	g__Prevotella	0.4932	0.0198		male_proximal vs distal	g__Brevundimonas	g__Rhodococcus	0.732	0.0099
female_T_TN	g__Actinomyces	g__Staphylococcus	0.474	0.0396		male T_TN	g__Agathobacter	g__Mobiluncus	-0.4173	0.0099		female_proximal vs distal	g__Anaerococcus	g__Ruminococcus_gauvreauii_group	-0.5223	0.0099		male_proximal vs distal	g__Brevundimonas	g__Sphingobacterium	0.7512	0.0099
female_T_TN	g__Aeromonas	g__Acinetobacter	0.7195	0.0099		male T_TN	g__Agathobacter	g__Negativicoccus	-0.4324	0.0099		female_proximal vs distal	g__Atopobium	g__Cutibacterium	0.4332	0.0099		male_proximal vs distal	g__Brevundimonas	g__Staphylococcus	0.4637	0.0099
female_T_TN	g__Aeromonas	g__Campylobacter	-0.6068	0.0099		male T_TN	g__Agathobacter	g__Ruminococcus	0.4407	0.0099		female_proximal vs distal	g__Bacteroides	g__Blautia	0.4558	0.0198		male_proximal vs distal	g__Butyricicoccus	g__Faecalibacterium	0.4064	0.0099
female_T_TN	g__Aeromonas	g__Collinsella	-0.4428	0.0396		male T_TN	g__Agathobacter	g__Ruminococcus_torques_group	0.4122	0.0099		female_proximal vs distal	g__Bacteroides	g__Ruminococcus_torques_group	0.4781	0.0198		male_proximal vs distal	g__Butyricicoccus	g__Roseburia	0.4017	0.0198
female_T_TN	g__Aeromonas	g__Coprococcus	-0.5277	0.0297		male T_TN	g__Akkermansia	g__Butyricimonas	0.496	0.0099		female_proximal vs distal	g__Bacteroides	g__Streptococcus	0.4637	0.0198		male_proximal vs distal	g__Campylobacter	g__Peptoniphilus	0.426	0.0099
female_T_TN	g__Aeromonas	g__Corynebacterium	0.4972	0.0297		male T_TN	g__Akkermansia	g__Clostridium_sensu_stricto_1	0.4593	0.0198		female_proximal vs distal	g__Bifidobacterium	g__Alloprevotella	-0.4583	0.0099		male_proximal vs distal	g__Catenibacterium	g__Alloprevotella	0.4278	0.0099
female_T_TN	g__Aeromonas	g__Delftia	0.8043	0.0099		male T_TN	g__Akkermansia	g__Dorea	-0.4665	0.0099		female_proximal vs distal	g__Bilophila	g__Gallicola	-0.4927	0.0099		male_proximal vs distal	g__Christensenellaceae_R_7_group	g__Family_XIII_AD3011_group	0.447	0.0099
female_T_TN	g__Aeromonas	g__Devosia	0.8453	0.0099		male T_TN	g__Akkermansia	g__Faecalibacterium	-0.5219	0.0099		female_proximal vs distal	g__Bilophila	g__UCG_002	0.4174	0.0297		male_proximal vs distal	g__Christensenellaceae_R_7_group	g__uncultured	0.4692	0.0099
female_T_TN	g__Aeromonas	g__Dorea	-0.6912	0.0099		male T_TN	g__Akkermansia	g__Lawsonella	0.4437	0.0099		female_proximal vs distal	g__Blautia	g__Actinomyces	-0.4683	0.0099		male_proximal vs distal	g__Clostridium_sensu_stricto_1	g__Dorea	-0.426	0.0099
female_T_TN	g__Aeromonas	g__Ensifer	0.7233	0.0099		male T_TN	g__Akkermansia	g__Subdoligranulum	-0.5169	0.0099		female_proximal vs distal	g__Blautia	g__Bacteroides	0.4558	0.0198		male_proximal vs distal	g__Clostridium_sensu_stricto_1	g__Romboutsia	0.5173	0.0099
female_T_TN	g__Aeromonas	g__Enterobacter	0.7524	0.0099		male T_TN	g__Alistipes	g__Bilophila	0.4156	0.0099		female_proximal vs distal	g__Blautia	g__Corynebacterium	-0.5867	0.0099		male_proximal vs distal	g__Collinsella	g__Brevundimonas	-0.4555	0.0099
female_T_TN	g__Aeromonas	g__Enterococcus	0.5177	0.0099		male T_TN	g__Alistipes	g__Catenibacterium	-0.4546	0.0099		female_proximal vs distal	g__Blautia	g__Cutibacterium	-0.4133	0.0198		male_proximal vs distal	g__Collinsella	g__Coprococcus	0.5966	0.0099
female_T_TN	g__Aeromonas	g__Escherichia_Shigella	0.5382	0.0198		male T_TN	g__Alistipes	g__Parabacteroides	0.4074	0.0198		female_proximal vs distal	g__Blautia	g__Enterococcus	-0.4457	0.0198		male_proximal vs distal	g__Collinsella	g__Cutibacterium	-0.5501	0.0099
female_T_TN	g__Aeromonas	g__Eubacterium_coprostanoligenes_group	-0.4405	0.0297		male T_TN	g__Alloprevotella	g__Butyricicoccus	0.5032	0.0099		female_proximal vs distal	g__Blautia	g__Faecalibacterium	0.5398	0.0099		male_proximal vs distal	g__Collinsella	g__Dorea	0.459	0.0099
female_T_TN	g__Aeromonas	g__Ezakiella	-0.6384	0.0099		male T_TN	g__Alloprevotella	g__Butyricimonas	-0.4192	0.0099		female_proximal vs distal	g__Blautia	g__Lachnoclostridium	0.6642	0.0099		male_proximal vs distal	g__Collinsella	g__Enterococcus	-0.4944	0.0099
female_T_TN	g__Aeromonas	g__Faecalibacterium	-0.5695	0.0099		male T_TN	g__Alloprevotella	g__Catenibacterium	0.6139	0.0099		female_proximal vs distal	g__Blautia	g__Lachnospira	0.4506	0.0099		male_proximal vs distal	g__Collinsella	g__Eubacterium_hallii_group	0.614	0.0099
female_T_TN	g__Aeromonas	g__Lachnoclostridium	-0.4522	0.0396		male T_TN	g__Alloprevotella	g__Coprococcus	0.4231	0.0198		female_proximal vs distal	g__Blautia	g__Lachnospiraceae_ND3007_group	0.4736	0.0099		male_proximal vs distal	g__Collinsella	g__Rothia	-0.5935	0.0099
female_T_TN	g__Aeromonas	g__Prevotella	-0.5219	0.0099		male T_TN	g__Alloprevotella	g__Faecalibacterium	0.4375	0.0099		female_proximal vs distal	g__Blautia	g__Ruminococcus_torques_group	0.4454	0.0099		male_proximal vs distal	g__Collinsella	g__Subdoligranulum	0.4596	0.0099
female_T_TN	g__Aeromonas	g__Pseudomonas	0.5078	0.0099		male T_TN	g__Alloprevotella	g__Fusicatenibacter	0.4419	0.0099		female_proximal vs distal	g__Blautia	g__Subdoligranulum	0.509	0.0099		male_proximal vs distal	g__Coprococcus	g__Brevundimonas	-0.4479	0.0099
female_T_TN	g__Aeromonas	g__Psychrobacter	0.8162	0.0099		male T_TN	g__Alloprevotella	g__Lachnospiraceae_NK4A136_group	0.4618	0.0099		female_proximal vs distal	g__Butyricicoccus	g__Fusicatenibacter	0.4784	0.0099		male_proximal vs distal	g__Coprococcus	g__Collinsella	0.5966	0.0099
female_T_TN	g__Aeromonas	g__Rhodococcus	0.6797	0.0099		male T_TN	g__Alloprevotella	g__Lachnospiraceae_UCG_010	0.4151	0.0396		female_proximal vs distal	g__Butyricicoccus	g__Peptococcus	-0.46	0.0099		male_proximal vs distal	g__Coprococcus	g__Dorea	0.4383	0.0099
female_T_TN	g__Aeromonas	g__S5_A14a	-0.444	0.0297		male T_TN	g__Alloprevotella	g__Ruminococcus_torques_group	0.4497	0.0198		female_proximal vs distal	g__Campylobacter	__unclassification	-0.501	0.0099		male_proximal vs distal	g__Coprococcus	g__Eubacterium_hallii_group	0.6669	0.0099
female_T_TN	g__Aeromonas	g__Sphingobacterium	0.7992	0.0099		male T_TN	g__Alloprevotella	g__Subdoligranulum	0.4085	0.0099		female_proximal vs distal	g__Campylobacter	g__Collinsella	0.4976	0.0099		male_proximal vs distal	g__Coprococcus	g__Faecalibacterium	0.4822	0.0099
female_T_TN	g__Aeromonas	g__Staphylococcus	0.5169	0.0198		male T_TN	g__Anaerococcus	g__Campylobacter	0.4047	0.0198		female_proximal vs distal	g__Campylobacter	g__Devosia	-0.401	0.0297		male_proximal vs distal	g__Coprococcus	g__Subdoligranulum	0.4232	0.0099
female_T_TN	g__Aeromonas	g__Stenotrophomonas	0.7665	0.0099		male T_TN	g__Anaerococcus	g__Finegoldia	0.6761	0.0099		female_proximal vs distal	g__Campylobacter	g__Dorea	0.4008	0.0495		male_proximal vs distal	g__Corynebacterium	g__Eubacterium_hallii_group	-0.4394	0.0099
female_T_TN	g__Aeromonas	g__UCG_002	-0.4056	0.0396		male T_TN	g__Anaerococcus	g__Negativicoccus	0.4278	0.0198		female_proximal vs distal	g__Campylobacter	g__Ezakiella	0.6832	0.0099		male_proximal vs distal	g__Corynebacterium	g__Negativicoccus	0.4736	0.0099
female_T_TN	g__Aeromonas	g__uncultured	-0.4467	0.0396		male T_TN	g__Anaerococcus	g__Peptoniphilus	0.7507	0.0099		female_proximal vs distal	g__Campylobacter	g__Lactobacillus	-0.4824	0.0099		male_proximal vs distal	g__Corynebacterium	g__Roseburia	-0.4525	0.0099
female_T_TN	g__Agathobacter	g__Alistipes	-0.4208	0.0396		male T_TN	g__Anaerostipes	g__Agathobacter	0.4423	0.0099		female_proximal vs distal	g__Campylobacter	g__Murdochiella	0.4406	0.0198		male_proximal vs distal	g__Corynebacterium	g__Staphylococcus	0.4954	0.0099
female_T_TN	g__Agathobacter	g__Coprococcus	0.4083	0.0297		male T_TN	g__Anaerostipes	g__Bifidobacterium	0.4985	0.0099		female_proximal vs distal	g__Campylobacter	g__Peptococcus	0.4841	0.0198		male_proximal vs distal	g__Cutibacterium	g__Aeromonas	0.4644	0.0099
female_T_TN	g__Agathobacter	g__Dorea	0.4441	0.0198		male T_TN	g__Anaerostipes	g__Fusicatenibacter	0.4227	0.0099		female_proximal vs distal	g__Campylobacter	g__Porphyromonas	0.4583	0.0099		male_proximal vs distal	g__Cutibacterium	g__Brevundimonas	0.6102	0.0099
female_T_TN	g__Agathobacter	g__Eggerthella	-0.4114	0.0198		male T_TN	g__Bacteroides	g__Corynebacterium	-0.443	0.0099		female_proximal vs distal	g__Campylobacter	g__S5_A14a	0.5517	0.0099		male_proximal vs distal	g__Cutibacterium	g__Collinsella	-0.5501	0.0099
female_T_TN	g__Agathobacter	g__Eubacterium_hallii_group	0.5096	0.0198		male T_TN	g__Bifidobacterium	g__Agathobacter	0.4276	0.0198		female_proximal vs distal	g__Campylobacter	g__Sphingobacterium	-0.4019	0.0297		male_proximal vs distal	g__Cutibacterium	g__Delftia	0.4075	0.0099
female_T_TN	g__Agathobacter	g__Fusicatenibacter	0.4955	0.0099		male T_TN	g__Bifidobacterium	g__Anaerostipes	0.4985	0.0099		female_proximal vs distal	g__Christensenellaceae_R_7_group	g__Clostridia_UCG_014	0.6492	0.0099		male_proximal vs distal	g__Cutibacterium	g__Enterococcus	0.4041	0.0099
female_T_TN	g__Agathobacter	g__Lachnospira	0.596	0.0099		male T_TN	g__Bifidobacterium	g__Blautia	0.5162	0.0099		female_proximal vs distal	g__Christensenellaceae_R_7_group	g__Coprococcus	0.4249	0.0198		male_proximal vs distal	g__Cutibacterium	g__Eubacterium_hallii_group	-0.4021	0.0099
female_T_TN	g__Agathobacter	g__Lachnospiraceae_FCS020_group	0.5244	0.0099		male T_TN	g__Bifidobacterium	g__Clostridia_vadinBB60_group	-0.4315	0.0099		female_proximal vs distal	g__Christensenellaceae_R_7_group	g__Eubacterium_coprostanoligenes_group	0.478	0.0099		male_proximal vs distal	g__Cutibacterium	g__Haemophilus	0.4144	0.0099
female_T_TN	g__Agathobacter	g__Lachnospiraceae_ND3007_group	0.6566	0.0099		male T_TN	g__Bifidobacterium	g__Dorea	0.4291	0.0198		female_proximal vs distal	g__Christensenellaceae_R_7_group	g__Family_XIII_AD3011_group	0.4692	0.0099		male_proximal vs distal	g__Cutibacterium	g__Lawsonella	0.4645	0.0099
female_T_TN	g__Agathobacter	g__Lachnospiraceae_UCG_004	0.6392	0.0099		male T_TN	g__Bifidobacterium	g__Faecalibacterium	0.4165	0.0099		female_proximal vs distal	g__Christensenellaceae_R_7_group	g__Murdochiella	-0.4038	0.0396		male_proximal vs distal	g__Cutibacterium	g__Pseudomonas	0.4896	0.0099
female_T_TN	g__Agathobacter	g__Parvimonas	-0.4806	0.0297		male T_TN	g__Bifidobacterium	g__Fusicatenibacter	0.4406	0.0198		female_proximal vs distal	g__Christensenellaceae_R_7_group	g__NK4A214_group	0.5388	0.0099		male_proximal vs distal	g__Cutibacterium	g__Rhodococcus	0.4045	0.0099
female_T_TN	g__Agathobacter	g__Ruminococcus_gauvreauii_group	0.5014	0.0099		male T_TN	g__Bifidobacterium	g__Lachnospira	0.4041	0.0198		female_proximal vs distal	g__Christensenellaceae_R_7_group	g__Romboutsia	0.4274	0.0198		male_proximal vs distal	g__Cutibacterium	g__Rothia	0.5616	0.0099
female_T_TN	g__Agathobacter	g__Senegalimassilia	0.4317	0.0297		male T_TN	g__Bifidobacterium	g__Lachnospiraceae_ND3007_group	0.4367	0.0099		female_proximal vs distal	g__Christensenellaceae_R_7_group	g__Ruminococcus	0.5162	0.0099		male_proximal vs distal	g__Cutibacterium	g__Sphingobacterium	0.411	0.0099
female_T_TN	g__Agathobacter	g__Solobacterium	-0.5745	0.0099		male T_TN	g__Bilophila	g__Alistipes	0.4156	0.0099		female_proximal vs distal	g__Christensenellaceae_R_7_group	g__UCG_005	0.7586	0.0099		male_proximal vs distal	g__Cutibacterium	g__Staphylococcus	0.6337	0.0099
female_T_TN	g__Agathobacter	g__Subdoligranulum	0.5078	0.0099		male T_TN	g__Bilophila	g__Catenibacterium	-0.4271	0.0198		female_proximal vs distal	g__Clostridia_UCG_014	g__Christensenellaceae_R_7_group	0.6492	0.0099		male_proximal vs distal	g__Cutibacterium	g__UCG_002	-0.4541	0.0099
female_T_TN	g__Agathobacter	g__UBA1819	-0.5741	0.0099		male T_TN	g__Bilophila	g__Family_XIII_AD3011_group	0.4442	0.0099		female_proximal vs distal	g__Clostridia_UCG_014	g__Family_XIII_AD3011_group	0.491	0.0099		male_proximal vs distal	g__Delftia	g__Aeromonas	0.8811	0.0099
female_T_TN	g__Alistipes	g__Agathobacter	-0.4208	0.0396		male T_TN	g__Bilophila	g__NK4A214_group	0.531	0.0099		female_proximal vs distal	g__Clostridia_UCG_014	g__NK4A214_group	0.4461	0.0099		male_proximal vs distal	g__Delftia	g__Brevundimonas	0.7293	0.0099
female_T_TN	g__Alistipes	g__Bilophila	0.4537	0.0198		male T_TN	g__Bilophila	g__UCG_003	0.4996	0.0099		female_proximal vs distal	g__Clostridia_UCG_014	g__Prevotella	-0.4152	0.0297		male_proximal vs distal	g__Delftia	g__Cutibacterium	0.4075	0.0099
female_T_TN	g__Alistipes	g__Christensenellaceae_R_7_group	0.4354	0.0198		male T_TN	g__Blautia	g__Agathobacter	0.4422	0.0099		female_proximal vs distal	g__Clostridia_UCG_014	g__Romboutsia	0.5084	0.0099		male_proximal vs distal	g__Delftia	g__Enterobacter	0.8198	0.0099
female_T_TN	g__Alistipes	g__Fusicatenibacter	-0.5898	0.0099		male T_TN	g__Blautia	g__Bifidobacterium	0.5162	0.0099		female_proximal vs distal	g__Clostridia_UCG_014	g__UCG_005	0.6145	0.0099		male_proximal vs distal	g__Delftia	g__Pseudomonas	0.5348	0.0099
female_T_TN	g__Alistipes	g__Fusobacterium	0.4424	0.0297		male T_TN	g__Blautia	g__Collinsella	0.4602	0.0099		female_proximal vs distal	g__Clostridium_sensu_stricto_1	g__Fusicatenibacter	0.4068	0.0297		male_proximal vs distal	g__Delftia	g__Rhodococcus	0.976	0.0099
female_T_TN	g__Alistipes	g__Gallicola	-0.4678	0.0297		male T_TN	g__Blautia	g__Dorea	0.6112	0.0099		female_proximal vs distal	g__Clostridium_sensu_stricto_1	g__Intestinibacter	0.5477	0.0099		male_proximal vs distal	g__Delftia	g__Sphingobacterium	0.9604	0.0099
female_T_TN	g__Alistipes	g__Lachnospiraceae_ND3007_group	-0.5541	0.0099		male T_TN	g__Blautia	g__Enterococcus	-0.4731	0.0099		female_proximal vs distal	g__Clostridium_sensu_stricto_1	g__NK4A214_group	0.4407	0.0099		male_proximal vs distal	g__Dialister	g__Ezakiella	0.4044	0.0099
female_T_TN	g__Alistipes	g__Murdochiella	-0.4687	0.0396		male T_TN	g__Blautia	g__Faecalibacterium	0.6237	0.0099		female_proximal vs distal	g__Clostridium_sensu_stricto_1	g__Romboutsia	0.6579	0.0099		male_proximal vs distal	g__Dorea	g__Blautia	0.5203	0.0099
female_T_TN	g__Alistipes	g__Parabacteroides	0.5906	0.0099		male T_TN	g__Blautia	g__Ruminococcus_torques_group	0.4189	0.0099		female_proximal vs distal	g__Colidextribacter	g__Lachnospiraceae_NK4A136_group	0.5	0.0099		male_proximal vs distal	g__Dorea	g__Clostridium_sensu_stricto_1	-0.426	0.0099
female_T_TN	g__Alistipes	g__Slackia	0.4722	0.0297		male T_TN	g__Blautia	g__Subdoligranulum	0.5586	0.0198		female_proximal vs distal	g__Colidextribacter	g__Negativibacillus	0.5576	0.0198		male_proximal vs distal	g__Dorea	g__Collinsella	0.459	0.0099
female_T_TN	g__Alistipes	g__UCG_005	0.444	0.0198		male T_TN	g__Brevundimonas	__unclassification	0.4263	0.0099		female_proximal vs distal	g__Collinsella	__unclassification	-0.4076	0.0396		male_proximal vs distal	g__Dorea	g__Coprococcus	0.4383	0.0099
female_T_TN	g__Alistipes	g__Veillonella	-0.4281	0.0495		male T_TN	g__Brevundimonas	g__Aeromonas	0.7268	0.0099		female_proximal vs distal	g__Collinsella	g__Campylobacter	0.4976	0.0099		male_proximal vs distal	g__Dorea	g__Enterococcus	-0.4034	0.0099
female_T_TN	g__Alloprevotella	g__Clostridium_sensu_stricto_1	-0.429	0.0297		male T_TN	g__Brevundimonas	g__Collinsella	-0.5479	0.0099		female_proximal vs distal	g__Collinsella	g__Peptococcus	0.4735	0.0297		male_proximal vs distal	g__Dorea	g__Faecalibacterium	0.5419	0.0099
female_T_TN	g__Alloprevotella	g__Ruminococcus_gnavus_group	-0.4176	0.0297		male T_TN	g__Brevundimonas	g__Coprococcus	-0.5056	0.0099		female_proximal vs distal	g__Collinsella	g__Sutterella	0.4109	0.0099		male_proximal vs distal	g__Dorea	g__Pseudomonas	-0.4319	0.0099
female_T_TN	g__Anaerococcus	__unclassification	-0.4514	0.0297		male T_TN	g__Brevundimonas	g__Cutibacterium	0.6518	0.0099		female_proximal vs distal	g__Coprococcus	g__Christensenellaceae_R_7_group	0.4249	0.0198		male_proximal vs distal	g__Dorea	g__Subdoligranulum	0.5588	0.0099
female_T_TN	g__Anaerococcus	g__Desulfovibrio	-0.529	0.0099		male T_TN	g__Brevundimonas	g__Delftia	0.7343	0.0099		female_proximal vs distal	g__Coprococcus	g__Corynebacterium	-0.455	0.0099		male_proximal vs distal	g__Enterobacter	g__Aeromonas	0.7071	0.0099
female_T_TN	g__Anaerococcus	g__Finegoldia	0.8124	0.0099		male T_TN	g__Brevundimonas	g__Devosia	0.7875	0.0099		female_proximal vs distal	g__Coprococcus	g__Cutibacterium	-0.528	0.0099		male_proximal vs distal	g__Enterobacter	g__Brevundimonas	0.5984	0.0099
female_T_TN	g__Anaerococcus	g__Lawsonella	0.4151	0.0495		male T_TN	g__Brevundimonas	g__Ensifer	0.8224	0.0099		female_proximal vs distal	g__Coprococcus	g__Delftia	-0.5585	0.0099		male_proximal vs distal	g__Enterobacter	g__Delftia	0.8198	0.0099
female_T_TN	g__Anaerococcus	g__Murdochiella	0.4053	0.0297		male T_TN	g__Brevundimonas	g__Enterobacter	0.5992	0.0099		female_proximal vs distal	g__Coprococcus	g__Devosia	-0.5638	0.0099		male_proximal vs distal	g__Enterobacter	g__Pseudomonas	0.4355	0.0198
female_T_TN	g__Anaerococcus	g__NK4A214_group	-0.4675	0.0198		male T_TN	g__Brevundimonas	g__Eubacterium_coprostanoligenes_group	-0.417	0.0198		female_proximal vs distal	g__Coprococcus	g__Dorea	0.4687	0.0297		male_proximal vs distal	g__Enterobacter	g__Rhodococcus	0.8217	0.0099
female_T_TN	g__Anaerococcus	g__Peptoniphilus	0.8243	0.0099		male T_TN	g__Brevundimonas	g__Negativibacillus	-0.413	0.0396		female_proximal vs distal	g__Coprococcus	g__Enterobacter	-0.6277	0.0099		male_proximal vs distal	g__Enterobacter	g__Sphingobacterium	0.8142	0.0099
female_T_TN	g__Anaerococcus	g__Prevotella	0.6677	0.0099		male T_TN	g__Brevundimonas	g__Prevotella	-0.5301	0.0099		female_proximal vs distal	g__Coprococcus	g__Enterococcus	-0.5068	0.0099		male_proximal vs distal	g__Enterococcus	g__Collinsella	-0.4944	0.0099
female_T_TN	g__Anaerostipes	g__Butyricicoccus	0.4445	0.0297		male T_TN	g__Brevundimonas	g__Pseudochrobactrum	0.8249	0.0099		female_proximal vs distal	g__Coprococcus	g__Eubacterium_coprostanoligenes_group	0.614	0.0099		male_proximal vs distal	g__Enterococcus	g__Cutibacterium	0.4041	0.0099
female_T_TN	g__Anaerostipes	g__Escherichia_Shigella	-0.5523	0.0099		male T_TN	g__Brevundimonas	g__Pseudomonas	0.5351	0.0099		female_proximal vs distal	g__Coprococcus	g__Eubacterium_eligens_group	0.4118	0.0297		male_proximal vs distal	g__Enterococcus	g__Dorea	-0.4034	0.0099
female_T_TN	g__Anaerostipes	g__Eubacterium_hallii_group	0.4071	0.0495		male T_TN	g__Brevundimonas	g__Psychrobacter	0.8595	0.0099		female_proximal vs distal	g__Coprococcus	g__Faecalibacterium	0.4396	0.0099		male_proximal vs distal	g__Enterococcus	g__Eubacterium_hallii_group	-0.4673	0.0099
female_T_TN	g__Anaerostipes	g__Fusicatenibacter	0.4903	0.0198		male T_TN	g__Brevundimonas	g__Rhodococcus	0.7232	0.0099		female_proximal vs distal	g__Coprococcus	g__Lachnospira	0.4459	0.0099		male_proximal vs distal	g__Enterococcus	g__Rothia	0.4014	0.0099
female_T_TN	g__Anaerostipes	g__Lachnospiraceae_ND3007_group	0.4604	0.0396		male T_TN	g__Brevundimonas	g__Sphingobacterium	0.7575	0.0099		female_proximal vs distal	g__Coprococcus	g__Negativicoccus	-0.5003	0.0099		male_proximal vs distal	g__Eubacterium_coprostanoligenes_group	g__UCG_002	0.7177	0.0099
female_T_TN	g__Anaerostipes	g__Romboutsia	0.6072	0.0099		male T_TN	g__Brevundimonas	g__Staphylococcus	0.4988	0.0099		female_proximal vs distal	g__Coprococcus	g__Pseudomonas	-0.6169	0.0099		male_proximal vs distal	g__Eubacterium_eligens_group	g__Lachnospiraceae_ND3007_group	0.464	0.0099
female_T_TN	g__Anaerostipes	g__Solobacterium	-0.4345	0.0396		male T_TN	g__Brevundimonas	g__Stenotrophomonas	0.7931	0.0099		female_proximal vs distal	g__Coprococcus	g__Rhodococcus	-0.5383	0.0099		male_proximal vs distal	g__Eubacterium_hallii_group	g__Collinsella	0.614	0.0099
female_T_TN	g__Atopobium	g__Cutibacterium	0.4433	0.0396		male T_TN	g__Butyricicoccus	g__Alloprevotella	0.5032	0.0099		female_proximal vs distal	g__Coprococcus	g__Ruminococcus	0.437	0.0099		male_proximal vs distal	g__Eubacterium_hallii_group	g__Coprococcus	0.6669	0.0099
female_T_TN	g__Bacteroides	g__Blautia	0.4142	0.0297		male T_TN	g__Butyricicoccus	g__Erysipelotrichaceae_UCG_003	0.5243	0.0099		female_proximal vs distal	g__Coprococcus	g__Sphingobacterium	-0.5462	0.0099		male_proximal vs distal	g__Eubacterium_hallii_group	g__Corynebacterium	-0.4394	0.0099
female_T_TN	g__Bacteroides	g__Enterococcus	-0.4026	0.0495		male T_TN	g__Butyricicoccus	g__S5_A14a	-0.4236	0.0099		female_proximal vs distal	g__Coprococcus	g__Staphylococcus	-0.4189	0.0099		male_proximal vs distal	g__Eubacterium_hallii_group	g__Cutibacterium	-0.4021	0.0099
female_T_TN	g__Bacteroides	g__Finegoldia	0.466	0.0198		male T_TN	g__Butyricimonas	g__Akkermansia	0.496	0.0099		female_proximal vs distal	g__Coprococcus	g__Stenotrophomonas	-0.4931	0.0099		male_proximal vs distal	g__Eubacterium_hallii_group	g__Enterococcus	-0.4673	0.0099
female_T_TN	g__Bacteroides	g__Parabacteroides	0.4846	0.0297		male T_TN	g__Butyricimonas	g__Alloprevotella	-0.4192	0.0099		female_proximal vs distal	g__Coprococcus	g__UCG_002	0.5185	0.0099		male_proximal vs distal	g__Eubacterium_hallii_group	g__Lachnospiraceae_ND3007_group	0.4543	0.0099
female_T_TN	g__Bacteroides	g__Prevotella	0.5249	0.0198		male T_TN	g__Butyricimonas	g__Catenibacterium	-0.4426	0.0099		female_proximal vs distal	g__Corynebacterium	g__Actinomyces	0.4112	0.0396		male_proximal vs distal	g__Eubacterium_hallii_group	g__Negativicoccus	-0.4652	0.0099
female_T_TN	g__Bacteroides	g__Ruminococcus_torques_group	0.655	0.0198		male T_TN	g__Butyricimonas	g__Desulfovibrio	0.4501	0.0099		female_proximal vs distal	g__Corynebacterium	g__Agathobacter	-0.4257	0.0198		male_proximal vs distal	g__Eubacterium_hallii_group	g__Staphylococcus	-0.4002	0.0099
female_T_TN	g__Bifidobacterium	g__Intestinibacter	0.4155	0.0297		male T_TN	g__Butyricimonas	g__Dorea	-0.413	0.0099		female_proximal vs distal	g__Corynebacterium	g__Blautia	-0.5867	0.0099		male_proximal vs distal	g__Ezakiella	g__Dialister	0.4044	0.0099
female_T_TN	g__Bilophila	g__Alistipes	0.4537	0.0198		male T_TN	g__Butyricimonas	g__Parabacteroides	0.4163	0.0198		female_proximal vs distal	g__Corynebacterium	g__Coprococcus	-0.455	0.0099		male_proximal vs distal	g__Ezakiella	g__Fastidiosipila	0.4092	0.0099
female_T_TN	g__Bilophila	g__Gallicola	-0.6306	0.0198		male T_TN	g__Campylobacter	g__Anaerococcus	0.4047	0.0198		female_proximal vs distal	g__Corynebacterium	g__Delftia	0.508	0.0099		male_proximal vs distal	g__Ezakiella	g__Fenollaria	0.5759	0.0099
female_T_TN	g__Bilophila	g__Porphyromonas	-0.4005	0.0297		male T_TN	g__Campylobacter	g__Dialister	0.4367	0.0099		female_proximal vs distal	g__Corynebacterium	g__Devosia	0.4889	0.0099		male_proximal vs distal	g__Ezakiella	g__Gallicola	0.464	0.0099
female_T_TN	g__Bilophila	g__UCG_002	0.4721	0.0198		male T_TN	g__Campylobacter	g__Finegoldia	0.4155	0.0198		female_proximal vs distal	g__Corynebacterium	g__Dorea	-0.4709	0.0198		male_proximal vs distal	g__Ezakiella	g__Peptococcus	0.4167	0.0099
female_T_TN	g__Blautia	g__Actinomyces	-0.5709	0.0099		male T_TN	g__Campylobacter	g__Peptoniphilus	0.4153	0.0198		female_proximal vs distal	g__Corynebacterium	g__Enterobacter	0.5461	0.0099		male_proximal vs distal	g__Ezakiella	g__Porphyromonas	0.5478	0.0099
female_T_TN	g__Blautia	g__Bacteroides	0.4142	0.0297		male T_TN	g__Catenibacterium	g__Alistipes	-0.4546	0.0099		female_proximal vs distal	g__Corynebacterium	g__Enterococcus	0.5512	0.0099		male_proximal vs distal	g__Ezakiella	g__S5_A14a	0.6034	0.0099
female_T_TN	g__Blautia	g__Corynebacterium	-0.589	0.0099		male T_TN	g__Catenibacterium	g__Alloprevotella	0.6139	0.0099		female_proximal vs distal	g__Corynebacterium	g__Escherichia_Shigella	0.432	0.0495		male_proximal vs distal	g__Faecalibacterium	g__Agathobacter	0.5152	0.0099
female_T_TN	g__Blautia	g__Enterococcus	-0.6054	0.0099		male T_TN	g__Catenibacterium	g__Bilophila	-0.4271	0.0198		female_proximal vs distal	g__Corynebacterium	g__Eubacterium_coprostanoligenes_group	-0.4007	0.0198		male_proximal vs distal	g__Faecalibacterium	g__Blautia	0.6294	0.0099
female_T_TN	g__Blautia	g__Eubacterium_hallii_group	0.4829	0.0198		male T_TN	g__Catenibacterium	g__Butyricimonas	-0.4426	0.0099		female_proximal vs distal	g__Corynebacterium	g__Eubacterium_eligens_group	-0.4174	0.0396		male_proximal vs distal	g__Faecalibacterium	g__Butyricicoccus	0.4064	0.0099
female_T_TN	g__Blautia	g__Facklamia	-0.4442	0.0198		male T_TN	g__Catenibacterium	g__Holdemanella	0.4466	0.0099		female_proximal vs distal	g__Corynebacterium	g__Faecalibacterium	-0.5818	0.0099		male_proximal vs distal	g__Faecalibacterium	g__Coprococcus	0.4822	0.0099
female_T_TN	g__Blautia	g__Faecalibacterium	0.6499	0.0099		male T_TN	g__Catenibacterium	g__Porphyromonas	-0.4258	0.0198		female_proximal vs distal	g__Corynebacterium	g__Lachnoclostridium	-0.591	0.0099		male_proximal vs distal	g__Faecalibacterium	g__Dorea	0.5419	0.0099
female_T_TN	g__Blautia	g__Lachnoclostridium	0.5557	0.0099		male T_TN	g__Catenibacterium	g__Ruminococcus	0.4588	0.0099		female_proximal vs distal	g__Corynebacterium	g__Lachnospira	-0.4828	0.0198		male_proximal vs distal	g__Faecalibacterium	g__Fastidiosipila	-0.4119	0.0099
female_T_TN	g__Blautia	g__Ruminococcus_torques_group	0.761	0.0099		male T_TN	g__Christensenellaceae_R_7_group	g__Aeromonas	-0.4941	0.0099		female_proximal vs distal	g__Corynebacterium	g__Pseudomonas	0.4168	0.0099		male_proximal vs distal	g__Faecalibacterium	g__Fusicatenibacter	0.434	0.0099
female_T_TN	g__Blautia	g__Subdoligranulum	0.4749	0.0198		male T_TN	g__Christensenellaceae_R_7_group	g__Family_XIII_AD3011_group	0.6004	0.0099		female_proximal vs distal	g__Corynebacterium	g__Sphingobacterium	0.499	0.0297		male_proximal vs distal	g__Faecalibacterium	g__Subdoligranulum	0.5744	0.0099
female_T_TN	g__Blautia	g__Varibaculum	-0.4154	0.0396		male T_TN	g__Christensenellaceae_R_7_group	g__Mobiluncus	0.4335	0.0099		female_proximal vs distal	g__Corynebacterium	g__Staphylococcus	0.5546	0.0099		male_proximal vs distal	g__Family_XIII_AD3011_group	g__Christensenellaceae_R_7_group	0.447	0.0099
female_T_TN	g__Butyricicoccus	g__Anaerostipes	0.4445	0.0297		male T_TN	g__Christensenellaceae_R_7_group	g__Negativibacillus	0.5086	0.0099		female_proximal vs distal	g__Corynebacterium	g__Subdoligranulum	-0.5028	0.0099		male_proximal vs distal	g__Family_XIII_AD3011_group	g__Megamonas	-0.4816	0.0099
female_T_TN	g__Butyricicoccus	g__Lachnospiraceae_UCG_004	0.4089	0.0495		male T_TN	g__Christensenellaceae_R_7_group	g__uncultured	0.4737	0.0099		female_proximal vs distal	g__Cutibacterium	g__Atopobium	0.4332	0.0099		male_proximal vs distal	g__Family_XIII_AD3011_group	g__NK4A214_group	0.4055	0.0099
female_T_TN	g__Butyricicoccus	g__Parvimonas	-0.5165	0.0099		male T_TN	g__Clostridia_UCG_014	g__Aeromonas	-0.4497	0.0198		female_proximal vs distal	g__Cutibacterium	g__Blautia	-0.4133	0.0198		male_proximal vs distal	g__Fastidiosipila	g__Ezakiella	0.4092	0.0099
female_T_TN	g__Butyricicoccus	g__Peptococcus	-0.4812	0.0099		male T_TN	g__Clostridia_UCG_014	g__Ensifer	-0.4352	0.0099		female_proximal vs distal	g__Cutibacterium	g__Coprococcus	-0.528	0.0099		male_proximal vs distal	g__Fastidiosipila	g__Faecalibacterium	-0.4119	0.0099
female_T_TN	g__Butyricicoccus	g__Peptostreptococcus	-0.5436	0.0099		male T_TN	g__Clostridia_UCG_014	g__Fenollaria	0.4096	0.0198		female_proximal vs distal	g__Cutibacterium	g__Delftia	0.4874	0.0099		male_proximal vs distal	g__Fastidiosipila	g__Murdochiella	0.5836	0.0099
female_T_TN	g__Butyricicoccus	g__Ruminococcus_gauvreauii_group	0.5374	0.0099		male T_TN	g__Clostridia_UCG_014	g__Klebsiella	-0.4687	0.0099		female_proximal vs distal	g__Cutibacterium	g__Devosia	0.5024	0.0099		male_proximal vs distal	g__Fastidiosipila	g__S5_A14a	0.4513	0.0099
female_T_TN	g__Campylobacter	__unclassification	-0.519	0.0297		male T_TN	g__Clostridia_vadinBB60_group	g__Bifidobacterium	-0.4315	0.0099		female_proximal vs distal	g__Cutibacterium	g__Enterobacter	0.5411	0.0099		male_proximal vs distal	g__Fenollaria	g__Ezakiella	0.5759	0.0099
female_T_TN	g__Campylobacter	g__Acinetobacter	-0.4735	0.0396		male T_TN	g__Clostridia_vadinBB60_group	g__Megasphaera	-0.4195	0.0099		female_proximal vs distal	g__Cutibacterium	g__Enterococcus	0.4885	0.0099		male_proximal vs distal	g__Fenollaria	g__Murdochiella	0.5317	0.0099
female_T_TN	g__Campylobacter	g__Aeromonas	-0.6068	0.0099		male T_TN	g__Clostridium_sensu_stricto_1	g__Akkermansia	0.4593	0.0198		female_proximal vs distal	g__Cutibacterium	g__Eubacterium_coprostanoligenes_group	-0.5685	0.0099		male_proximal vs distal	g__Fenollaria	g__Peptoniphilus	0.4542	0.0099
female_T_TN	g__Campylobacter	g__Collinsella	0.6049	0.0099		male T_TN	g__Clostridium_sensu_stricto_1	g__Romboutsia	0.4444	0.0198		female_proximal vs distal	g__Cutibacterium	g__Faecalibacterium	-0.4575	0.0099		male_proximal vs distal	g__Fenollaria	g__Porphyromonas	0.631	0.0099
female_T_TN	g__Campylobacter	g__Devosia	-0.4589	0.0297		male T_TN	g__Collinsella	g__Aeromonas	-0.4287	0.0396		female_proximal vs distal	g__Cutibacterium	g__Klebsiella	0.4131	0.0297		male_proximal vs distal	g__Fenollaria	g__S5_A14a	0.532	0.0099
female_T_TN	g__Campylobacter	g__Dorea	0.4833	0.0198		male T_TN	g__Collinsella	g__Blautia	0.4602	0.0099		female_proximal vs distal	g__Cutibacterium	g__Lactobacillus	0.4089	0.0099		male_proximal vs distal	g__Finegoldia	g__Anaerococcus	0.6501	0.0099
female_T_TN	g__Campylobacter	g__Ensifer	-0.5414	0.0099		male T_TN	g__Collinsella	g__Brevundimonas	-0.5479	0.0099		female_proximal vs distal	g__Cutibacterium	g__Megasphaera	0.4005	0.0396		male_proximal vs distal	g__Finegoldia	g__Peptoniphilus	0.6719	0.0099
female_T_TN	g__Campylobacter	g__Enterobacter	-0.4753	0.0198		male T_TN	g__Collinsella	g__Coprococcus	0.7336	0.0099		female_proximal vs distal	g__Cutibacterium	g__S5_A14a	-0.4321	0.0198		male_proximal vs distal	g__Fusicatenibacter	g__Agathobacter	0.4642	0.0099
female_T_TN	g__Campylobacter	g__Ezakiella	0.6875	0.0099		male T_TN	g__Collinsella	g__Cutibacterium	-0.5273	0.0099		female_proximal vs distal	g__Cutibacterium	g__Sphingobacterium	0.5221	0.0099		male_proximal vs distal	g__Fusicatenibacter	g__Blautia	0.4158	0.0099
female_T_TN	g__Campylobacter	g__Fenollaria	0.4756	0.0099		male T_TN	g__Collinsella	g__Devosia	-0.4522	0.0198		female_proximal vs distal	g__Cutibacterium	g__Staphylococcus	0.5674	0.0099		male_proximal vs distal	g__Fusicatenibacter	g__Faecalibacterium	0.434	0.0099
female_T_TN	g__Campylobacter	g__Gallicola	0.4708	0.0297		male T_TN	g__Collinsella	g__Dorea	0.516	0.0099		female_proximal vs distal	g__Cutibacterium	g__Stenotrophomonas	0.4196	0.0198		male_proximal vs distal	g__Fusobacterium	g__Lachnospiraceae_ND3007_group	-0.4565	0.0099
female_T_TN	g__Campylobacter	g__Murdochiella	0.4554	0.0297		male T_TN	g__Collinsella	g__Ensifer	-0.4247	0.0198		female_proximal vs distal	g__Cutibacterium	g__UCG_002	-0.5554	0.0099		male_proximal vs distal	g__Fusobacterium	g__Parvimonas	0.4678	0.0099
female_T_TN	g__Campylobacter	g__Oscillibacter	-0.4212	0.0495		male T_TN	g__Collinsella	g__Enterococcus	-0.4751	0.0099		female_proximal vs distal	g__Delftia	g__Coprococcus	-0.5585	0.0099		male_proximal vs distal	g__Fusobacterium	g__Ruminococcus	-0.41	0.0099
female_T_TN	g__Campylobacter	g__Peptococcus	0.6044	0.0099		male T_TN	g__Collinsella	g__Eubacterium_hallii_group	0.5943	0.0099		female_proximal vs distal	g__Delftia	g__Corynebacterium	0.508	0.0099		male_proximal vs distal	g__Gallicola	g__Ezakiella	0.464	0.0099
female_T_TN	g__Campylobacter	g__Porphyromonas	0.5094	0.0099		male T_TN	g__Collinsella	g__Faecalibacterium	0.4661	0.0099		female_proximal vs distal	g__Delftia	g__Cutibacterium	0.4874	0.0099		male_proximal vs distal	g__Gallicola	g__Peptococcus	0.4328	0.0099
female_T_TN	g__Campylobacter	g__Psychrobacter	-0.5258	0.0099		male T_TN	g__Collinsella	g__Prevotella	0.4014	0.0198		female_proximal vs distal	g__Delftia	g__Devosia	0.925	0.0099		male_proximal vs distal	g__Gemella	g__Parvimonas	0.4349	0.0099
female_T_TN	g__Campylobacter	g__Rhodococcus	-0.4589	0.0495		male T_TN	g__Collinsella	g__Pseudochrobactrum	-0.4422	0.0099		female_proximal vs distal	g__Delftia	g__Enterobacter	0.927	0.0099		male_proximal vs distal	g__Gemella	g__Peptostreptococcus	0.4953	0.0099
female_T_TN	g__Campylobacter	g__Ruminococcus_gnavus_group	-0.4707	0.0099		male T_TN	g__Collinsella	g__Psychrobacter	-0.4695	0.0099		female_proximal vs distal	g__Delftia	g__Enterococcus	0.53	0.0099		male_proximal vs distal	g__Gemella	g__Streptococcus	0.4013	0.0099
female_T_TN	g__Campylobacter	g__S5_A14a	0.6163	0.0099		male T_TN	g__Collinsella	g__Subdoligranulum	0.5893	0.0099		female_proximal vs distal	g__Delftia	g__Escherichia_Shigella	0.5435	0.0099		male_proximal vs distal	g__Haemophilus	g__Cutibacterium	0.4144	0.0099
female_T_TN	g__Campylobacter	g__Sphingobacterium	-0.4974	0.0396		male T_TN	g__Collinsella	g__Sutterella	0.4312	0.0099		female_proximal vs distal	g__Delftia	g__Eubacterium_coprostanoligenes_group	-0.4014	0.0297		male_proximal vs distal	g__Haemophilus	g__Rothia	0.521	0.0099
female_T_TN	g__Campylobacter	g__Varibaculum	0.4246	0.0198		male T_TN	g__Collinsella	g__Veillonella	-0.4559	0.0099		female_proximal vs distal	g__Delftia	g__Faecalibacterium	-0.4322	0.0099		male_proximal vs distal	g__Lachnoclostridium	g__Bacteroides	0.4259	0.0099
female_T_TN	g__Christensenellaceae_R_7_group	g__Alistipes	0.4354	0.0198		male T_TN	g__Coprococcus	g__Aeromonas	-0.4699	0.0099		female_proximal vs distal	g__Delftia	g__Lactobacillus	0.4459	0.0297		male_proximal vs distal	g__Lachnospira	g__Lachnospiraceae_ND3007_group	0.5004	0.0099
female_T_TN	g__Christensenellaceae_R_7_group	g__Eubacterium_hallii_group	0.4533	0.0198		male T_TN	g__Coprococcus	g__Alloprevotella	0.4231	0.0198		female_proximal vs distal	g__Delftia	g__Negativicoccus	0.5248	0.0099		male_proximal vs distal	g__Lachnospira	g__Ruminococcus_gauvreauii_group	0.4416	0.0099
female_T_TN	g__Christensenellaceae_R_7_group	g__Facklamia	-0.4738	0.0297		male T_TN	g__Coprococcus	g__Brevundimonas	-0.5056	0.0099		female_proximal vs distal	g__Delftia	g__Pseudomonas	0.6192	0.0099		male_proximal vs distal	g__Lachnospiraceae_ND3007_group	g__Eubacterium_eligens_group	0.464	0.0099
female_T_TN	g__Christensenellaceae_R_7_group	g__NK4A214_group	0.5069	0.0099		male T_TN	g__Coprococcus	g__Collinsella	0.7336	0.0099		female_proximal vs distal	g__Delftia	g__Rhodococcus	0.9093	0.0099		male_proximal vs distal	g__Lachnospiraceae_ND3007_group	g__Eubacterium_hallii_group	0.4543	0.0099
female_T_TN	g__Christensenellaceae_R_7_group	g__Ruminococcus_gnavus_group	-0.4787	0.0198		male T_TN	g__Coprococcus	g__Devosia	-0.5198	0.0099		female_proximal vs distal	g__Delftia	g__Sphingobacterium	0.9459	0.0099		male_proximal vs distal	g__Lachnospiraceae_ND3007_group	g__Fusobacterium	-0.4565	0.0099
female_T_TN	g__Christensenellaceae_R_7_group	g__UCG_005	0.7447	0.0099		male T_TN	g__Coprococcus	g__Dorea	0.4559	0.0099		female_proximal vs distal	g__Delftia	g__Staphylococcus	0.6086	0.0099		male_proximal vs distal	g__Lachnospiraceae_ND3007_group	g__Lachnospira	0.5004	0.0099
female_T_TN	g__Clostridium_sensu_stricto_1	g__Alloprevotella	-0.429	0.0297		male T_TN	g__Coprococcus	g__Ensifer	-0.4352	0.0099		female_proximal vs distal	g__Delftia	g__Stenotrophomonas	0.8764	0.0099		male_proximal vs distal	g__Lachnospiraceae_NK4A136_group	g__Anaerococcus	-0.4403	0.0099
female_T_TN	g__Clostridium_sensu_stricto_1	g__Escherichia_Shigella	-0.4129	0.0297		male T_TN	g__Coprococcus	g__Eubacterium_hallii_group	0.7007	0.0099		female_proximal vs distal	g__Desulfovibrio	g__Anaerococcus	-0.4397	0.0198		male_proximal vs distal	g__Lachnospiraceae_NK4A136_group	g__Negativicoccus	-0.422	0.0099
female_T_TN	g__Clostridium_sensu_stricto_1	g__Fusicatenibacter	0.409	0.0495		male T_TN	g__Coprococcus	g__Faecalibacterium	0.5016	0.0099		female_proximal vs distal	g__Desulfovibrio	g__Lachnospiraceae_NK4A136_group	0.4384	0.0099		male_proximal vs distal	g__Lachnospiraceae_NK4A136_group	g__Roseburia	0.4208	0.0099
female_T_TN	g__Clostridium_sensu_stricto_1	g__Romboutsia	0.5904	0.0099		male T_TN	g__Coprococcus	g__Negativicoccus	-0.4169	0.0198		female_proximal vs distal	g__Desulfovibrio	g__Lawsonella	-0.4066	0.0099		male_proximal vs distal	g__Lachnospiraceae_NK4A136_group	g__Ruminococcus	0.4758	0.0099
female_T_TN	g__Clostridium_sensu_stricto_1	g__S5_A14a	0.5297	0.0198		male T_TN	g__Coprococcus	g__Pseudochrobactrum	-0.5085	0.0099		female_proximal vs distal	g__Desulfovibrio	g__NK4A214_group	0.4064	0.0297		male_proximal vs distal	g__Lawsonella	g__Cutibacterium	0.4645	0.0099
female_T_TN	g__Clostridium_sensu_stricto_1	g__Slackia	-0.5862	0.0099		male T_TN	g__Coprococcus	g__Psychrobacter	-0.5165	0.0099		female_proximal vs distal	g__Desulfovibrio	g__Peptoniphilus	-0.5915	0.0099		male_proximal vs distal	g__Lawsonella	g__Negativicoccus	0.4343	0.0099
female_T_TN	g__Colidextribacter	g__Fusicatenibacter	-0.4044	0.0297		male T_TN	g__Coprococcus	g__Subdoligranulum	0.4704	0.0099		female_proximal vs distal	g__Desulfovibrio	g__Ruminococcus	0.4364	0.0099		male_proximal vs distal	g__Megamonas	g__Family_XIII_AD3011_group	-0.4816	0.0099
female_T_TN	g__Colidextribacter	g__Fusobacterium	0.4907	0.0099		male T_TN	g__Coprococcus	g__UCG_005	0.4097	0.0099		female_proximal vs distal	g__Desulfovibrio	g__UCG_005	0.4354	0.0099		male_proximal vs distal	g__Murdochiella	g__Anaerococcus	0.4173	0.0099
female_T_TN	g__Colidextribacter	g__Lachnospiraceae_FCS020_group	-0.6018	0.0099		male T_TN	g__Corynebacterium	g__Agathobacter	-0.4072	0.0297		female_proximal vs distal	g__Devosia	g__Campylobacter	-0.401	0.0297		male_proximal vs distal	g__Murdochiella	g__Fastidiosipila	0.5836	0.0099
female_T_TN	g__Colidextribacter	g__Lachnospiraceae_NK4A136_group	0.4189	0.0099		male T_TN	g__Corynebacterium	g__Bacteroides	-0.443	0.0099		female_proximal vs distal	g__Devosia	g__Coprococcus	-0.5638	0.0099		male_proximal vs distal	g__Murdochiella	g__Fenollaria	0.5317	0.0099
female_T_TN	g__Colidextribacter	g__Negativibacillus	0.6534	0.0099		male T_TN	g__Corynebacterium	g__Cutibacterium	0.4049	0.0198		female_proximal vs distal	g__Devosia	g__Corynebacterium	0.4889	0.0099		male_proximal vs distal	g__Murdochiella	g__Peptoniphilus	0.4841	0.0099
female_T_TN	g__Colidextribacter	g__Oscillibacter	0.5076	0.0297		male T_TN	g__Corynebacterium	g__Negativicoccus	0.5057	0.0099		female_proximal vs distal	g__Devosia	g__Cutibacterium	0.5024	0.0099		male_proximal vs distal	g__Murdochiella	g__Porphyromonas	0.4594	0.0099
female_T_TN	g__Colidextribacter	g__Tyzzerella	0.4195	0.0495		male T_TN	g__Corynebacterium	g__Staphylococcus	0.4569	0.0099		female_proximal vs distal	g__Devosia	g__Delftia	0.925	0.0099		male_proximal vs distal	g__Murdochiella	g__S5_A14a	0.4162	0.0099
female_T_TN	g__Colidextribacter	g__uncultured	0.4445	0.0297		male T_TN	g__Cutibacterium	g__Aeromonas	0.4782	0.0099		female_proximal vs distal	g__Devosia	g__Dorea	-0.4314	0.0198		male_proximal vs distal	g__Negativicoccus	g__Agathobacter	-0.4252	0.0099
female_T_TN	g__Collinsella	g__Acinetobacter	-0.4667	0.0099		male T_TN	g__Cutibacterium	g__Brevundimonas	0.6518	0.0099		female_proximal vs distal	g__Devosia	g__Enterobacter	0.8693	0.0099		male_proximal vs distal	g__Negativicoccus	g__Anaerococcus	0.4754	0.0099
female_T_TN	g__Collinsella	g__Aeromonas	-0.4428	0.0396		male T_TN	g__Cutibacterium	g__Collinsella	-0.5273	0.0099		female_proximal vs distal	g__Devosia	g__Enterococcus	0.5779	0.0099		male_proximal vs distal	g__Negativicoccus	g__Corynebacterium	0.4736	0.0099
female_T_TN	g__Collinsella	g__Campylobacter	0.6049	0.0099		male T_TN	g__Cutibacterium	g__Corynebacterium	0.4049	0.0198		female_proximal vs distal	g__Devosia	g__Escherichia_Shigella	0.5401	0.0198		male_proximal vs distal	g__Negativicoccus	g__Eubacterium_hallii_group	-0.4652	0.0099
female_T_TN	g__Collinsella	g__Coprococcus	0.6145	0.0099		male T_TN	g__Cutibacterium	g__Delftia	0.4327	0.0099		female_proximal vs distal	g__Devosia	g__Eubacterium_coprostanoligenes_group	-0.4034	0.0396		male_proximal vs distal	g__Negativicoccus	g__Lachnospiraceae_NK4A136_group	-0.422	0.0099
female_T_TN	g__Collinsella	g__Devosia	-0.4882	0.0198		male T_TN	g__Cutibacterium	g__Devosia	0.4987	0.0099		female_proximal vs distal	g__Devosia	g__Faecalibacterium	-0.47	0.0099		male_proximal vs distal	g__Negativicoccus	g__Lawsonella	0.4343	0.0099
female_T_TN	g__Collinsella	g__Dorea	0.4735	0.0297		male T_TN	g__Cutibacterium	g__Ensifer	0.4533	0.0198		female_proximal vs distal	g__Devosia	g__Lactobacillus	0.447	0.0099		male_proximal vs distal	g__NK4A214_group	g__Family_XIII_AD3011_group	0.4055	0.0099
female_T_TN	g__Collinsella	g__Ensifer	-0.4674	0.0297		male T_TN	g__Cutibacterium	g__Eubacterium_coprostanoligenes_group	-0.421	0.0099		female_proximal vs distal	g__Devosia	g__Pseudomonas	0.6259	0.0099		male_proximal vs distal	g__Parabacteroides	g__Bilophila	0.4227	0.0198
female_T_TN	g__Collinsella	g__Oscillibacter	-0.518	0.0099		male T_TN	g__Cutibacterium	g__Eubacterium_hallii_group	-0.4118	0.0099		female_proximal vs distal	g__Devosia	g__Rhodococcus	0.8444	0.0099		male_proximal vs distal	g__Parvimonas	g__Fusobacterium	0.4678	0.0099
female_T_TN	g__Collinsella	g__Peptococcus	0.5525	0.0099		male T_TN	g__Cutibacterium	g__Haemophilus	0.4675	0.0198		female_proximal vs distal	g__Devosia	g__Sphingobacterium	0.8815	0.0099		male_proximal vs distal	g__Parvimonas	g__Gemella	0.4349	0.0099
female_T_TN	g__Collinsella	g__Porphyromonas	0.4358	0.0297		male T_TN	g__Cutibacterium	g__Lawsonella	0.4129	0.0099		female_proximal vs distal	g__Devosia	g__Staphylococcus	0.6163	0.0099		male_proximal vs distal	g__Parvimonas	g__Peptostreptococcus	0.5545	0.0099
female_T_TN	g__Collinsella	g__Pseudomonas	-0.4006	0.0396		male T_TN	g__Cutibacterium	g__Negativicoccus	0.4634	0.0198		female_proximal vs distal	g__Devosia	g__Stenotrophomonas	0.848	0.0099		male_proximal vs distal	g__Peptococcus	g__Ezakiella	0.4167	0.0099
female_T_TN	g__Collinsella	g__Psychrobacter	-0.4681	0.0297		male T_TN	g__Cutibacterium	g__Pseudochrobactrum	0.4922	0.0099		female_proximal vs distal	g__Dorea	g__Agathobacter	0.5175	0.0099		male_proximal vs distal	g__Peptococcus	g__Gallicola	0.4328	0.0099
female_T_TN	g__Collinsella	g__S5_A14a	0.5232	0.0198		male T_TN	g__Cutibacterium	g__Pseudomonas	0.6321	0.0099		female_proximal vs distal	g__Dorea	g__Campylobacter	0.4008	0.0495		male_proximal vs distal	g__Peptoniphilus	g__Anaerococcus	0.7617	0.0099
female_T_TN	g__Collinsella	g__Sutterella	0.4112	0.0297		male T_TN	g__Cutibacterium	g__Psychrobacter	0.5718	0.0099		female_proximal vs distal	g__Dorea	g__Coprococcus	0.4687	0.0297		male_proximal vs distal	g__Peptoniphilus	g__Campylobacter	0.426	0.0099
female_T_TN	g__Coprococcus	g__Acinetobacter	-0.5311	0.0099		male T_TN	g__Cutibacterium	g__Rhodococcus	0.4329	0.0099		female_proximal vs distal	g__Dorea	g__Corynebacterium	-0.4709	0.0198		male_proximal vs distal	g__Peptoniphilus	g__Fenollaria	0.4542	0.0099
female_T_TN	g__Coprococcus	g__Aeromonas	-0.5277	0.0297		male T_TN	g__Cutibacterium	g__Sphingobacterium	0.4467	0.0099		female_proximal vs distal	g__Dorea	g__Devosia	-0.4314	0.0198		male_proximal vs distal	g__Peptoniphilus	g__Finegoldia	0.6719	0.0099
female_T_TN	g__Coprococcus	g__Agathobacter	0.4083	0.0297		male T_TN	g__Cutibacterium	g__Staphylococcus	0.5909	0.0099		female_proximal vs distal	g__Dorea	g__Enterobacter	-0.4408	0.0396		male_proximal vs distal	g__Peptoniphilus	g__Murdochiella	0.4841	0.0099
female_T_TN	g__Coprococcus	g__Collinsella	0.6145	0.0099		male T_TN	g__Cutibacterium	g__Stenotrophomonas	0.4622	0.0099		female_proximal vs distal	g__Dorea	g__Enterococcus	-0.4723	0.0099		male_proximal vs distal	g__Peptoniphilus	g__Porphyromonas	0.4898	0.0099
female_T_TN	g__Coprococcus	g__Corynebacterium	-0.5239	0.0099		male T_TN	g__Cutibacterium	g__UCG_002	-0.4583	0.0099		female_proximal vs distal	g__Dorea	g__Escherichia_Shigella	-0.4035	0.0396		male_proximal vs distal	g__Peptostreptococcus	g__Gemella	0.4953	0.0099
female_T_TN	g__Coprococcus	g__Cutibacterium	-0.4598	0.0396		male T_TN	g__Delftia	__unclassification	0.424	0.0198		female_proximal vs distal	g__Dorea	g__Eubacterium_hallii_group	0.4137	0.0198		male_proximal vs distal	g__Peptostreptococcus	g__Parvimonas	0.5545	0.0099
female_T_TN	g__Coprococcus	g__Delftia	-0.5235	0.0198		male T_TN	g__Delftia	g__Aeromonas	0.8602	0.0099		female_proximal vs distal	g__Dorea	g__Faecalibacterium	0.617	0.0099		male_proximal vs distal	g__Porphyromonas	__unclassification	-0.4389	0.0099
female_T_TN	g__Coprococcus	g__Devosia	-0.5533	0.0099		male T_TN	g__Delftia	g__Brevundimonas	0.7343	0.0099		female_proximal vs distal	g__Dorea	g__Ruminococcus_torques_group	0.4754	0.0099		male_proximal vs distal	g__Porphyromonas	g__Ezakiella	0.5478	0.0099
female_T_TN	g__Coprococcus	g__Dorea	0.6522	0.0099		male T_TN	g__Delftia	g__Cutibacterium	0.4327	0.0099		female_proximal vs distal	g__Dorea	g__Subdoligranulum	0.4914	0.0099		male_proximal vs distal	g__Porphyromonas	g__Fenollaria	0.631	0.0099
female_T_TN	g__Coprococcus	g__Ensifer	-0.5331	0.0099		male T_TN	g__Delftia	g__Devosia	0.8765	0.0099		female_proximal vs distal	g__Eggerthella	g__Agathobacter	-0.4445	0.0198		male_proximal vs distal	g__Porphyromonas	g__Murdochiella	0.4594	0.0099
female_T_TN	g__Coprococcus	g__Enterobacter	-0.6037	0.0099		male T_TN	g__Delftia	g__Ensifer	0.8297	0.0099		female_proximal vs distal	g__Eggerthella	g__Holdemanella	-0.5998	0.0099		male_proximal vs distal	g__Porphyromonas	g__Peptoniphilus	0.4898	0.0099
female_T_TN	g__Coprococcus	g__Enterococcus	-0.4633	0.0198		male T_TN	g__Delftia	g__Enterobacter	0.8214	0.0099		female_proximal vs distal	g__Eggerthella	g__Intestinibacter	0.4052	0.0396		male_proximal vs distal	g__Porphyromonas	g__S5_A14a	0.463	0.0099
female_T_TN	g__Coprococcus	g__Eubacterium_coprostanoligenes_group	0.6408	0.0099		male T_TN	g__Delftia	g__Intestinibacter	-0.461	0.0099		female_proximal vs distal	g__Eggerthella	g__Lawsonella	0.4546	0.0099		male_proximal vs distal	g__Prevotella	g__Brevundimonas	-0.466	0.0099
female_T_TN	g__Coprococcus	g__Eubacterium_eligens_group	0.5457	0.0198		male T_TN	g__Delftia	g__Pseudochrobactrum	0.8234	0.0099		female_proximal vs distal	g__Eggerthella	g__Ruminococcus_gauvreauii_group	-0.4978	0.0099		male_proximal vs distal	g__Pseudomonas	g__Aeromonas	0.5653	0.0099
female_T_TN	g__Coprococcus	g__Eubacterium_hallii_group	0.4233	0.0297		male T_TN	g__Delftia	g__Psychrobacter	0.8562	0.0099		female_proximal vs distal	g__Enterobacter	g__Coprococcus	-0.6277	0.0099		male_proximal vs distal	g__Pseudomonas	g__Brevundimonas	0.5748	0.0099
female_T_TN	g__Coprococcus	g__Ezakiella	0.4347	0.0396		male T_TN	g__Delftia	g__Rhodococcus	0.9809	0.0099		female_proximal vs distal	g__Enterobacter	g__Corynebacterium	0.5461	0.0099		male_proximal vs distal	g__Pseudomonas	g__Cutibacterium	0.4896	0.0099
female_T_TN	g__Coprococcus	g__Faecalibacterium	0.5266	0.0198		male T_TN	g__Delftia	g__Romboutsia	-0.4232	0.0198		female_proximal vs distal	g__Enterobacter	g__Cutibacterium	0.5411	0.0099		male_proximal vs distal	g__Pseudomonas	g__Delftia	0.5348	0.0099
female_T_TN	g__Coprococcus	g__Lachnospira	0.4067	0.0495		male T_TN	g__Delftia	g__Sphingobacterium	0.9625	0.0099		female_proximal vs distal	g__Enterobacter	g__Delftia	0.927	0.0099		male_proximal vs distal	g__Pseudomonas	g__Dorea	-0.4319	0.0099
female_T_TN	g__Coprococcus	g__Lactobacillus	-0.458	0.0396		male T_TN	g__Delftia	g__Stenotrophomonas	0.9156	0.0099		female_proximal vs distal	g__Enterobacter	g__Devosia	0.8693	0.0099		male_proximal vs distal	g__Pseudomonas	g__Enterobacter	0.4355	0.0198
female_T_TN	g__Coprococcus	g__Pseudomonas	-0.508	0.0099		male T_TN	g__Delftia	g__uncultured	-0.5258	0.0099		female_proximal vs distal	g__Enterobacter	g__Dorea	-0.4408	0.0396		male_proximal vs distal	g__Pseudomonas	g__Rhodococcus	0.5253	0.0099
female_T_TN	g__Coprococcus	g__Psychrobacter	-0.5335	0.0099		male T_TN	g__Desulfovibrio	g__Butyricimonas	0.4501	0.0099		female_proximal vs distal	g__Enterobacter	g__Enterococcus	0.5731	0.0099		male_proximal vs distal	g__Pseudomonas	g__Sphingobacterium	0.5559	0.0099
female_T_TN	g__Coprococcus	g__Rhodococcus	-0.4906	0.0297		male T_TN	g__Desulfovibrio	g__Negativibacillus	0.4322	0.0396		female_proximal vs distal	g__Enterobacter	g__Escherichia_Shigella	0.5816	0.0099		male_proximal vs distal	g__Rhodococcus	g__Aeromonas	0.8719	0.0099
female_T_TN	g__Coprococcus	g__Ruminococcus	0.4131	0.0198		male T_TN	g__Devosia	g__Aeromonas	0.8584	0.0099		female_proximal vs distal	g__Enterobacter	g__Eubacterium_coprostanoligenes_group	-0.467	0.0099		male_proximal vs distal	g__Rhodococcus	g__Brevundimonas	0.732	0.0099
female_T_TN	g__Coprococcus	g__Ruminococcus_gnavus_group	-0.5137	0.0198		male T_TN	g__Devosia	g__Brevundimonas	0.7875	0.0099		female_proximal vs distal	g__Enterobacter	g__Faecalibacterium	-0.52	0.0099		male_proximal vs distal	g__Rhodococcus	g__Cutibacterium	0.4045	0.0099
female_T_TN	g__Coprococcus	g__Sphingobacterium	-0.5237	0.0297		male T_TN	g__Devosia	g__Collinsella	-0.4522	0.0198		female_proximal vs distal	g__Enterobacter	g__Klebsiella	0.4017	0.0297		male_proximal vs distal	g__Rhodococcus	g__Delftia	0.976	0.0099
female_T_TN	g__Coprococcus	g__Stenotrophomonas	-0.4499	0.0297		male T_TN	g__Devosia	g__Coprococcus	-0.5198	0.0099		female_proximal vs distal	g__Enterobacter	g__Negativicoccus	0.4874	0.0099		male_proximal vs distal	g__Rhodococcus	g__Enterobacter	0.8217	0.0099
female_T_TN	g__Coprococcus	g__UCG_002	0.5269	0.0099		male T_TN	g__Devosia	g__Cutibacterium	0.4987	0.0099		female_proximal vs distal	g__Enterobacter	g__Pseudomonas	0.5642	0.0099		male_proximal vs distal	g__Rhodococcus	g__Pseudomonas	0.5253	0.0099
female_T_TN	g__Coprococcus	g__UCG_005	0.4884	0.0198		male T_TN	g__Devosia	g__Delftia	0.8765	0.0099		female_proximal vs distal	g__Enterobacter	g__Rhodococcus	0.8465	0.0099		male_proximal vs distal	g__Rhodococcus	g__Sphingobacterium	0.9589	0.0099
female_T_TN	g__Corynebacterium	g__Actinomyces	0.5444	0.0198		male T_TN	g__Devosia	g__Ensifer	0.7932	0.0099		female_proximal vs distal	g__Enterobacter	g__Sphingobacterium	0.8927	0.0099		male_proximal vs distal	g__Romboutsia	g__Clostridium_sensu_stricto_1	0.5173	0.0099
female_T_TN	g__Corynebacterium	g__Aeromonas	0.4972	0.0297		male T_TN	g__Devosia	g__Enterobacter	0.7753	0.0099		female_proximal vs distal	g__Enterobacter	g__Staphylococcus	0.5633	0.0099		male_proximal vs distal	g__Romboutsia	g__Ruminococcus	0.5836	0.0099
female_T_TN	g__Corynebacterium	g__Blautia	-0.589	0.0099		male T_TN	g__Devosia	g__Intestinibacter	-0.4167	0.0099		female_proximal vs distal	g__Enterobacter	g__Stenotrophomonas	0.8268	0.0099		male_proximal vs distal	g__Roseburia	g__Butyricicoccus	0.4017	0.0198
female_T_TN	g__Corynebacterium	g__Coprococcus	-0.5239	0.0099		male T_TN	g__Devosia	g__Pseudochrobactrum	0.8789	0.0099		female_proximal vs distal	g__Enterobacter	g__UCG_002	-0.4481	0.0198		male_proximal vs distal	g__Roseburia	g__Corynebacterium	-0.4525	0.0099
female_T_TN	g__Corynebacterium	g__Delftia	0.5499	0.0099		male T_TN	g__Devosia	g__Pseudomonas	0.4886	0.0198		female_proximal vs distal	g__Enterococcus	g__Blautia	-0.4457	0.0198		male_proximal vs distal	g__Roseburia	g__Lachnospiraceae_NK4A136_group	0.4208	0.0099
female_T_TN	g__Corynebacterium	g__Devosia	0.5111	0.0099		male T_TN	g__Devosia	g__Psychrobacter	0.915	0.0099		female_proximal vs distal	g__Enterococcus	g__Coprococcus	-0.5068	0.0099		male_proximal vs distal	g__Rothia	g__Collinsella	-0.5935	0.0099
female_T_TN	g__Corynebacterium	g__Dorea	-0.5594	0.0198		male T_TN	g__Devosia	g__Rhodococcus	0.8668	0.0099		female_proximal vs distal	g__Enterococcus	g__Corynebacterium	0.5512	0.0099		male_proximal vs distal	g__Rothia	g__Cutibacterium	0.5616	0.0099
female_T_TN	g__Corynebacterium	g__Enterobacter	0.5751	0.0198		male T_TN	g__Devosia	g__Sphingobacterium	0.8954	0.0099		female_proximal vs distal	g__Enterococcus	g__Cutibacterium	0.4885	0.0099		male_proximal vs distal	g__Rothia	g__Enterococcus	0.4014	0.0099
female_T_TN	g__Corynebacterium	g__Enterococcus	0.6531	0.0099		male T_TN	g__Devosia	g__Staphylococcus	0.4198	0.0099		female_proximal vs distal	g__Enterococcus	g__Delftia	0.53	0.0099		male_proximal vs distal	g__Rothia	g__Haemophilus	0.521	0.0099
female_T_TN	g__Corynebacterium	g__Escherichia_Shigella	0.55	0.0099		male T_TN	g__Devosia	g__Stenotrophomonas	0.9292	0.0099		female_proximal vs distal	g__Enterococcus	g__Devosia	0.5779	0.0099		male_proximal vs distal	g__Rothia	g__UCG_002	-0.4564	0.0099
female_T_TN	g__Corynebacterium	g__Eubacterium_coprostanoligenes_group	-0.4703	0.0198		male T_TN	g__Devosia	g__uncultured	-0.5183	0.0099		female_proximal vs distal	g__Enterococcus	g__Dorea	-0.4723	0.0099		male_proximal vs distal	g__Rothia	g__Veillonella	0.4211	0.0099
female_T_TN	g__Corynebacterium	g__Eubacterium_eligens_group	-0.5585	0.0099		male T_TN	g__Dialister	g__Campylobacter	0.4367	0.0099		female_proximal vs distal	g__Enterococcus	g__Enterobacter	0.5731	0.0099		male_proximal vs distal	g__Ruminococcus	g__Anaerococcus	-0.4578	0.0099
female_T_TN	g__Corynebacterium	g__Eubacterium_hallii_group	-0.5632	0.0099		male T_TN	g__Dialister	g__Ezakiella	0.5788	0.0099		female_proximal vs distal	g__Enterococcus	g__Escherichia_Shigella	0.4786	0.0099		male_proximal vs distal	g__Ruminococcus	g__Fusobacterium	-0.41	0.0099
female_T_TN	g__Corynebacterium	g__Faecalibacterium	-0.6856	0.0099		male T_TN	g__Dialister	g__Fenollaria	0.4035	0.0099		female_proximal vs distal	g__Enterococcus	g__Faecalibacterium	-0.6425	0.0099		male_proximal vs distal	g__Ruminococcus	g__Lachnospiraceae_NK4A136_group	0.4758	0.0099
female_T_TN	g__Corynebacterium	g__Lachnoclostridium	-0.6026	0.0099		male T_TN	g__Dialister	g__Mobiluncus	0.4974	0.0198		female_proximal vs distal	g__Enterococcus	g__Lachnospira	-0.4004	0.0198		male_proximal vs distal	g__Ruminococcus	g__Romboutsia	0.5836	0.0099
female_T_TN	g__Corynebacterium	g__Lachnospira	-0.4659	0.0099		male T_TN	g__Dialister	g__Porphyromonas	0.5204	0.0099		female_proximal vs distal	g__Enterococcus	g__Lactobacillus	0.4956	0.0099		male_proximal vs distal	g__Ruminococcus_gauvreauii_group	g__Lachnospira	0.4416	0.0099
female_T_TN	g__Corynebacterium	g__Lachnospiraceae_ND3007_group	-0.4153	0.0297		male T_TN	g__Dialister	g__Prevotella	0.436	0.0198		female_proximal vs distal	g__Enterococcus	g__Pseudomonas	0.4128	0.0099		male_proximal vs distal	g__S5_A14a	g__Ezakiella	0.6034	0.0099
female_T_TN	g__Corynebacterium	g__Prevotella	-0.4126	0.0198		male T_TN	g__Dialister	g__S5_A14a	0.5365	0.0099		female_proximal vs distal	g__Enterococcus	g__Rhodococcus	0.4393	0.0198		male_proximal vs distal	g__S5_A14a	g__Fastidiosipila	0.4513	0.0099
female_T_TN	g__Corynebacterium	g__Ruminococcus	-0.5065	0.0099		male T_TN	g__Dorea	g__Akkermansia	-0.4665	0.0099		female_proximal vs distal	g__Enterococcus	g__Ruminococcus_torques_group	-0.4286	0.0099		male_proximal vs distal	g__S5_A14a	g__Fenollaria	0.532	0.0099
female_T_TN	g__Corynebacterium	g__Ruminococcus_torques_group	-0.542	0.0099		male T_TN	g__Dorea	g__Bifidobacterium	0.4291	0.0198		female_proximal vs distal	g__Enterococcus	g__Sphingobacterium	0.484	0.0198		male_proximal vs distal	g__S5_A14a	g__Murdochiella	0.4162	0.0099
female_T_TN	g__Corynebacterium	g__Sphingobacterium	0.4897	0.0396		male T_TN	g__Dorea	g__Blautia	0.6112	0.0099		female_proximal vs distal	g__Enterococcus	g__Stenotrophomonas	0.4023	0.0198		male_proximal vs distal	g__S5_A14a	g__Porphyromonas	0.463	0.0099
female_T_TN	g__Corynebacterium	g__Staphylococcus	0.5345	0.0099		male T_TN	g__Dorea	g__Butyricimonas	-0.413	0.0099		female_proximal vs distal	g__Erysipelotrichaceae_UCG_003	g__Incertae_Sedis	-0.4355	0.0099		male_proximal vs distal	g__Sphingobacterium	g__Aeromonas	0.8973	0.0099
female_T_TN	g__Corynebacterium	g__Subdoligranulum	-0.4987	0.0099		male T_TN	g__Dorea	g__Collinsella	0.516	0.0099		female_proximal vs distal	g__Erysipelotrichaceae_UCG_003	g__Ruminococcus_gnavus_group	0.6666	0.0099		male_proximal vs distal	g__Sphingobacterium	g__Brevundimonas	0.7512	0.0099
female_T_TN	g__Corynebacterium	g__UCG_002	-0.4151	0.0198		male T_TN	g__Dorea	g__Coprococcus	0.4559	0.0099		female_proximal vs distal	g__Escherichia_Shigella	g__Corynebacterium	0.432	0.0495		male_proximal vs distal	g__Sphingobacterium	g__Cutibacterium	0.411	0.0099
female_T_TN	g__Cutibacterium	g__Acinetobacter	0.4317	0.0099		male T_TN	g__Dorea	g__Enterococcus	-0.416	0.0198		female_proximal vs distal	g__Escherichia_Shigella	g__Delftia	0.5435	0.0099		male_proximal vs distal	g__Sphingobacterium	g__Delftia	0.9604	0.0099
female_T_TN	g__Cutibacterium	g__Atopobium	0.4433	0.0396		male T_TN	g__Dorea	g__Faecalibacterium	0.7174	0.0099		female_proximal vs distal	g__Escherichia_Shigella	g__Devosia	0.5401	0.0198		male_proximal vs distal	g__Sphingobacterium	g__Enterobacter	0.8142	0.0099
female_T_TN	g__Cutibacterium	g__Coprococcus	-0.4598	0.0396		male T_TN	g__Dorea	g__Subdoligranulum	0.5979	0.0099		female_proximal vs distal	g__Escherichia_Shigella	g__Dorea	-0.4035	0.0396		male_proximal vs distal	g__Sphingobacterium	g__Pseudomonas	0.5559	0.0099
female_T_TN	g__Cutibacterium	g__Enterobacter	0.4352	0.0495		male T_TN	g__Ensifer	g__Aeromonas	0.8055	0.0099		female_proximal vs distal	g__Escherichia_Shigella	g__Enterobacter	0.5816	0.0099		male_proximal vs distal	g__Sphingobacterium	g__Rhodococcus	0.9589	0.0099
female_T_TN	g__Cutibacterium	g__Enterococcus	0.5382	0.0198		male T_TN	g__Ensifer	g__Brevundimonas	0.8224	0.0099		female_proximal vs distal	g__Escherichia_Shigella	g__Enterococcus	0.4786	0.0099		male_proximal vs distal	g__Staphylococcus	g__Aeromonas	0.4233	0.0099
female_T_TN	g__Cutibacterium	g__Eubacterium_coprostanoligenes_group	-0.4436	0.0495		male T_TN	g__Ensifer	g__Clostridia_UCG_014	-0.4352	0.0099		female_proximal vs distal	g__Escherichia_Shigella	g__Eubacterium_hallii_group	-0.4121	0.0198		male_proximal vs distal	g__Staphylococcus	g__Brevundimonas	0.4637	0.0099
female_T_TN	g__Cutibacterium	g__Ezakiella	-0.4769	0.0099		male T_TN	g__Ensifer	g__Collinsella	-0.4247	0.0198		female_proximal vs distal	g__Escherichia_Shigella	g__Fenollaria	-0.5515	0.0099		male_proximal vs distal	g__Staphylococcus	g__Corynebacterium	0.4954	0.0099
female_T_TN	g__Cutibacterium	g__Faecalibacterium	-0.4737	0.0198		male T_TN	g__Ensifer	g__Coprococcus	-0.4352	0.0099		female_proximal vs distal	g__Escherichia_Shigella	g__Rhodococcus	0.5251	0.0099		male_proximal vs distal	g__Staphylococcus	g__Cutibacterium	0.6337	0.0099
female_T_TN	g__Cutibacterium	g__Lachnospira	-0.4425	0.0396		male T_TN	g__Ensifer	g__Cutibacterium	0.4533	0.0198		female_proximal vs distal	g__Escherichia_Shigella	g__Sphingobacterium	0.5193	0.0099		male_proximal vs distal	g__Staphylococcus	g__Eubacterium_hallii_group	-0.4002	0.0099
female_T_TN	g__Cutibacterium	g__Lachnospiraceae_NK4A136_group	-0.5221	0.0099		male T_TN	g__Ensifer	g__Delftia	0.8297	0.0099		female_proximal vs distal	g__Escherichia_Shigella	g__Staphylococcus	0.4982	0.0198		male_proximal vs distal	g__Staphylococcus	g__UCG_002	-0.4021	0.0099
female_T_TN	g__Cutibacterium	g__Lactobacillus	0.5776	0.0198		male T_TN	g__Ensifer	g__Devosia	0.7932	0.0099		female_proximal vs distal	g__Escherichia_Shigella	g__Stenotrophomonas	0.4568	0.0099		male_proximal vs distal	g__Staphylococcus	g__UCG_003	-0.4187	0.0099
female_T_TN	g__Cutibacterium	g__Psychrobacter	0.4404	0.0495		male T_TN	g__Ensifer	g__Enterobacter	0.722	0.0099		female_proximal vs distal	g__Eubacterium_coprostanoligenes_group	g__Christensenellaceae_R_7_group	0.478	0.0099		male_proximal vs distal	g__Streptococcus	g__Gemella	0.4013	0.0099
female_T_TN	g__Cutibacterium	g__Ruminococcus_torques_group	-0.4916	0.0495		male T_TN	g__Ensifer	g__Family_XIII_UCG_001	-0.4765	0.0198		female_proximal vs distal	g__Eubacterium_coprostanoligenes_group	g__Coprococcus	0.614	0.0099		male_proximal vs distal	g__Subdoligranulum	g__Collinsella	0.4596	0.0099
female_T_TN	g__Cutibacterium	g__Slackia	0.5087	0.0099		male T_TN	g__Ensifer	g__Negativibacillus	-0.4633	0.0099		female_proximal vs distal	g__Eubacterium_coprostanoligenes_group	g__Corynebacterium	-0.4007	0.0198		male_proximal vs distal	g__Subdoligranulum	g__Coprococcus	0.4232	0.0099
female_T_TN	g__Cutibacterium	g__Sphingobacterium	0.414	0.0297		male T_TN	g__Ensifer	g__Prevotella	-0.4758	0.0099		female_proximal vs distal	g__Eubacterium_coprostanoligenes_group	g__Cutibacterium	-0.5685	0.0099		male_proximal vs distal	g__Subdoligranulum	g__Dorea	0.5588	0.0099
female_T_TN	g__Cutibacterium	g__UCG_002	-0.4298	0.0099		male T_TN	g__Ensifer	g__Pseudochrobactrum	0.819	0.0099		female_proximal vs distal	g__Eubacterium_coprostanoligenes_group	g__Delftia	-0.4014	0.0297		male_proximal vs distal	g__Subdoligranulum	g__Faecalibacterium	0.5744	0.0099
female_T_TN	g__Delftia	g__Acinetobacter	0.689	0.0099		male T_TN	g__Ensifer	g__Pseudomonas	0.4271	0.0099		female_proximal vs distal	g__Eubacterium_coprostanoligenes_group	g__Devosia	-0.4034	0.0396		male_proximal vs distal	g__UCG_002	g__Cutibacterium	-0.4541	0.0099
female_T_TN	g__Delftia	g__Aeromonas	0.8043	0.0099		male T_TN	g__Ensifer	g__Psychrobacter	0.868	0.0099		female_proximal vs distal	g__Eubacterium_coprostanoligenes_group	g__Enterobacter	-0.467	0.0099		male_proximal vs distal	g__UCG_002	g__Eubacterium_coprostanoligenes_group	0.7177	0.0099
female_T_TN	g__Delftia	g__Coprococcus	-0.5235	0.0198		male T_TN	g__Ensifer	g__Rhodococcus	0.8259	0.0099		female_proximal vs distal	g__Eubacterium_coprostanoligenes_group	g__Faecalibacterium	0.4143	0.0099		male_proximal vs distal	g__UCG_002	g__Rothia	-0.4564	0.0099
female_T_TN	g__Delftia	g__Corynebacterium	0.5499	0.0099		male T_TN	g__Ensifer	g__Romboutsia	-0.5014	0.0099		female_proximal vs distal	g__Eubacterium_coprostanoligenes_group	g__Lawsonella	-0.4272	0.0099		male_proximal vs distal	g__UCG_002	g__Staphylococcus	-0.4021	0.0099
female_T_TN	g__Delftia	g__Devosia	0.9143	0.0099		male T_TN	g__Ensifer	g__Ruminococcus_gauvreauii_group	-0.4213	0.0099		female_proximal vs distal	g__Eubacterium_coprostanoligenes_group	g__NK4A214_group	0.4758	0.0099		male_proximal vs distal	g__UCG_002	g__UCG_003	0.4736	0.0099
female_T_TN	g__Delftia	g__Dorea	-0.4885	0.0198		male T_TN	g__Ensifer	g__Sphingobacterium	0.8572	0.0099		female_proximal vs distal	g__Eubacterium_coprostanoligenes_group	g__Pseudomonas	-0.4156	0.0495		male_proximal vs distal	g__UCG_003	g__Staphylococcus	-0.4187	0.0099
female_T_TN	g__Delftia	g__Ensifer	0.7779	0.0099		male T_TN	g__Ensifer	g__Stenotrophomonas	0.8854	0.0099		female_proximal vs distal	g__Eubacterium_coprostanoligenes_group	g__Ruminococcus	0.6961	0.0099		male_proximal vs distal	g__UCG_003	g__UCG_002	0.4736	0.0099
female_T_TN	g__Delftia	g__Enterobacter	0.9087	0.0099		male T_TN	g__Ensifer	g__uncultured	-0.4695	0.0099		female_proximal vs distal	g__Eubacterium_coprostanoligenes_group	g__Sphingobacterium	-0.4897	0.0099		male_proximal vs distal	g__uncultured	g__Christensenellaceae_R_7_group	0.4692	0.0099
female_T_TN	g__Delftia	g__Enterococcus	0.5382	0.0099		male T_TN	g__Enterobacter	g__Aeromonas	0.6869	0.0099		female_proximal vs distal	g__Eubacterium_coprostanoligenes_group	g__Staphylococcus	-0.522	0.0099		male_proximal vs distal	g__Veillonella	g__Rothia	0.4211	0.0099
female_T_TN	g__Delftia	g__Escherichia_Shigella	0.6923	0.0099		male T_TN	g__Enterobacter	g__Brevundimonas	0.5992	0.0099		female_proximal vs distal	g__Eubacterium_coprostanoligenes_group	g__Stenotrophomonas	-0.4452	0.0198
female_T_TN	g__Delftia	g__Eubacterium_coprostanoligenes_group	-0.4027	0.0495		male T_TN	g__Enterobacter	g__Delftia	0.8214	0.0099		female_proximal vs distal	g__Eubacterium_coprostanoligenes_group	g__UCG_002	0.8412	0.0099
female_T_TN	g__Delftia	g__Ezakiella	-0.4576	0.0297		male T_TN	g__Enterobacter	g__Devosia	0.7753	0.0099		female_proximal vs distal	g__Eubacterium_coprostanoligenes_group	g__UCG_005	0.4328	0.0198
female_T_TN	g__Delftia	g__Faecalibacterium	-0.4611	0.0198		male T_TN	g__Enterobacter	g__Ensifer	0.722	0.0099		female_proximal vs distal	g__Eubacterium_coprostanoligenes_group	g__uncultured	0.4361	0.0099
female_T_TN	g__Delftia	g__Lactobacillus	0.5361	0.0099		male T_TN	g__Enterobacter	g__Mobiluncus	-0.4035	0.0099		female_proximal vs distal	g__Eubacterium_eligens_group	g__Coprococcus	0.4118	0.0297
female_T_TN	g__Delftia	g__Pseudomonas	0.5464	0.0198		male T_TN	g__Enterobacter	g__Peptoniphilus	-0.428	0.0198		female_proximal vs distal	g__Eubacterium_eligens_group	g__Corynebacterium	-0.4174	0.0396
female_T_TN	g__Delftia	g__Psychrobacter	0.8345	0.0099		male T_TN	g__Enterobacter	g__Pseudochrobactrum	0.708	0.0099		female_proximal vs distal	g__Eubacterium_eligens_group	g__Lachnoclostridium	0.4172	0.0297
female_T_TN	g__Delftia	g__Rhodococcus	0.886	0.0099		male T_TN	g__Enterobacter	g__Psychrobacter	0.7606	0.0099		female_proximal vs distal	g__Eubacterium_eligens_group	g__Lachnospira	0.4276	0.0198
female_T_TN	g__Delftia	g__Ruminococcus_gnavus_group	0.4464	0.0396		male T_TN	g__Enterobacter	g__Rhodococcus	0.8248	0.0099		female_proximal vs distal	g__Eubacterium_eligens_group	g__Lawsonella	-0.4466	0.0198
female_T_TN	g__Delftia	g__Sphingobacterium	0.931	0.0099		male T_TN	g__Enterobacter	g__Sphingobacterium	0.8141	0.0099		female_proximal vs distal	g__Eubacterium_hallii_group	g__Actinomyces	-0.4536	0.0099
female_T_TN	g__Delftia	g__Staphylococcus	0.5478	0.0099		male T_TN	g__Enterobacter	g__Stenotrophomonas	0.8233	0.0099		female_proximal vs distal	g__Eubacterium_hallii_group	g__Agathobacter	0.5311	0.0099
female_T_TN	g__Delftia	g__Stenotrophomonas	0.8644	0.0099		male T_TN	g__Enterobacter	g__uncultured	-0.5473	0.0099		female_proximal vs distal	g__Eubacterium_hallii_group	g__Dorea	0.4137	0.0198
female_T_TN	g__Delftia	g__uncultured	-0.4324	0.0297		male T_TN	g__Enterococcus	g__Blautia	-0.4731	0.0099		female_proximal vs distal	g__Eubacterium_hallii_group	g__Escherichia_Shigella	-0.4121	0.0198
female_T_TN	g__Desulfovibrio	g__Anaerococcus	-0.529	0.0099		male T_TN	g__Enterococcus	g__Collinsella	-0.4751	0.0099		female_proximal vs distal	g__Eubacterium_hallii_group	g__Faecalibacterium	0.4835	0.0198
female_T_TN	g__Desulfovibrio	g__Ezakiella	-0.406	0.0099		male T_TN	g__Enterococcus	g__Dorea	-0.416	0.0198		female_proximal vs distal	g__Eubacterium_hallii_group	g__Ruminococcus	0.5082	0.0198
female_T_TN	g__Desulfovibrio	g__Fenollaria	-0.4439	0.0495		male T_TN	g__Enterococcus	g__Eubacterium_hallii_group	-0.4429	0.0198		female_proximal vs distal	g__Eubacterium_hallii_group	g__Ruminococcus_torques_group	0.5596	0.0099
[truncated: 874 more rows]

## Sheet: Table S9
Supplementary Table S9.Genus-level microbiota with significant correlations (p < 0.05) to clinical parameters across colorectal cancer patients, categorized by gender, cancer origin, and TNM group (T/TN)
[truncated: 858 more rows]

[truncated: 6 more sheets: Table S10, Table S11, Table S 12, Table S 13, ESM, Table S14]
